# Supplementary material for: Dual Transcriptomic Analysis Reveals a Delayed Antiviral Response of Haliotis diversicolor supertexta against Haliotid Herpesvirus-1
Source: Viruses. 2019 Apr 24;11(4):383. doi: 10.3390/v11040383 (PMC6520846; doi:10.3390/v11040383)
Supplement: Supplementary file 1 [file viruses-11-00383-s001.zip › Table S1-9.xlsx]

## Sheet: Table S1
Table S1. Primers used for qPCR validation of RNA-seq results.
Gene ID	Transcript ID	Annotation	Forward primer 5'->3'	Reverse primer 5'->3'
CASP8	Cluster-1007.37571	caspase 8	GCCCTGCTGAAGTCCTGATT	AAGCCTGGACAAGGATCAGC
CTSC	Cluster-1007.79173	cathepsin C	ACTGCAATCCCTACAAGGGC	ATGACCCAGTCAAGCCAGTG
OAS2-X1	Cluster-1007.78719	2'-5'-oligoadenylate synthase 2-like isoform X1	CCGGAGGATCCAAGACATCG	TGGTTTACCCCATGTCTGCC
IFI44L-1	Cluster-1007.117371	Interferon-induced protein 44-like protein 1	GACCGCAAGCGCTGAAATAG	GAGCGTGACCCACAGTGTTA
IFI44L-2	Cluster-1007.60396	Interferon-induced protein 44-like protein 2	CCATCACACTGTGGCTCCTT	GCGGACGTTACAAATACGCC
GAPDH	Cluster-1007.76498	glyceraldehyde-3-phosphate dehydrogenase	TGTCGGTAAGAGCAATGCCA	GCTTCAAGGCAAGTTGACCG
SOCS	Cluster-1007.76005	Suppressor of Cytokine Signaling	CATGGTTGTAGGGGTGCCAT	GAGCCATAGAGGACGGAAGC
HcHD 1	Cluster-1007.72249	hemocyanin isoform 2	CGCAGCTGCAATGACTCAAA	TTATTTGGTCCTGGGCCGTC

## Sheet: Table S2
Table S2. Functional annotation of the assemble unigenes
Unigene ID	Gene Length	NR ID	NR Description	NT ID	NT Description	KO ID	KO Description	Swissprot ID	Swissprot Description	PFAM ID	PFAM description	Gene Ontology Biological Pathway	BP Description	Gene Ontology Molecular Function	MF Description	Gene Ontology Cellular Component	CC Description	KOG ID	KOG Description
Cluster-1007.26775	4655	EKC32576.1	RING finger protein 31 [Crassostrea gigas]	--	--	K11974	E3 ubiquitin-protein ligase RNF31	Q96EP0	E3 ubiquitin-protein ligase RNF31 OS=Homo sapiens OX=9606 GN=RNF31 PE=1 SV=1	PF00641	Zn-finger in Ran binding protein and others	--	--	GO:0008270	zinc ion binding	--	--	--	--
Cluster-1007.26774	992	--	--	--	--	--	--	--	--	PF00397//PF01607	WW domain//Chitin binding Peritrophin-A domain	GO:0006030	chitin metabolic process	GO:0005515//GO:0008061	protein binding//chitin binding	GO:0005576	extracellular region	--	--
Cluster-1007.26777	746	--	--	LC027358.1	Haliotis diversicolor genomic DNA, BAC clone: 009_rep_c2377	--	--	--	--	--	--	--	--	--	--	--	--	--	--
Cluster-1007.26776	1000	--	--	--	--	--	--	--	--	PF01825	GPCR proteolysis site, GPS, motif	--	--	--	--	GO:0016020	membrane	--	--
Cluster-1007.26771	502	--	--	--	--	--	--	--	--	--	--	--	--	--	--	--	--	--	--
Cluster-1007.26770	232	--	--	--	--	--	--	--	--	--	--	--	--	--	--	--	--	--	--
Cluster-1007.26773	228	--	--	AB183454.1	Haliotis diversicolor MIP-I gene for molluscan indoleamine 2,3-dioxygenase like protein I, exon 1-13, complete cds	--	--	--	--	--	--	--	--	--	--	--	--	--	--
Cluster-1007.26772	531	--	--	--	--	--	--	--	--	--	--	--	--	--	--	--	--	--	--
Cluster-1007.26779	1733	--	--	--	--	--	--	--	--	--	--	--	--	--	--	--	--	--	--
Cluster-1007.26778	315	--	--	--	--	--	--	--	--	--	--	--	--	--	--	--	--	--	--
Cluster-28564.0	1736	XP_009061749.1	hypothetical protein LOTGIDRAFT_166436 [Lottia gigantea]>gi|556098903|gb|ESO87555.1| hypothetical protein LOTGIDRAFT_166436 [Lottia gigantea]	--	--	--	--	Q96KG7	Multiple epidermal growth factor-like domains protein 10 OS=Homo sapiens OX=9606 GN=MEGF10 PE=1 SV=1	PF03955//PF02251	Adenovirus hexon-associated protein (IX)//Proteasome activator pa28 alpha subunit	--	--	GO:0031423	hexon binding	GO:0019012//GO:0008537	virion//proteasome activator complex	--	--
Cluster-1007.54648	393	--	--	HQ650413.1	Haliotis diversicolor clone Hdi138 microsatellite sequence	--	--	--	--	--	--	--	--	--	--	--	--	--	--
Cluster-1007.54649	395	--	--	--	--	--	--	--	--	--	--	--	--	--	--	--	--	--	--
Cluster-1007.54644	4769	XP_011447796.1	PREDICTED: TBC1 domain family member 25-like [Crassostrea gigas]	XM_017722417.1	PREDICTED: Pygocentrus nattereri TBC1 domain family member 25 (tbc1d25), transcript variant X3, mRNA	--	--	A1A5B6	TBC1 domain family member 25 OS=Mus musculus OX=10090 GN=Tbc1d25 PE=1 SV=1	PF01609//PF06888	Transposase DDE domain//Putative Phosphatase	GO:0008152//GO:0006313	metabolic process//transposition, DNA-mediated	GO:0004803//GO:0003677//GO:0016791	transposase activity//DNA binding//phosphatase activity	--	--	KOG2197	Ypt/Rab-specific GTPase-activating protein GYP7 and related proteins
Cluster-1007.54645	2144	--	--	--	--	--	--	--	--	--	--	--	--	--	--	--	--	--	--
Cluster-1007.54646	201	--	--	--	--	--	--	--	--	--	--	--	--	--	--	--	--	--	--
Cluster-1007.54647	415	--	--	LC027314.1	Haliotis diversicolor genomic DNA, BAC clone: 002_c14	--	--	--	--	--	--	--	--	--	--	--	--	--	--
Cluster-1007.54640	1481	XP_002612532.1	hypothetical protein BRAFLDRAFT_214423 [Branchiostoma floridae]>gi|229297909|gb|EEN68541.1| hypothetical protein BRAFLDRAFT_214423, partial [Branchiostoma floridae]	--	--	--	--	Q5M8Z2	Protein preY, mitochondrial OS=Xenopus tropicalis OX=8364 GN=pyurf PE=2 SV=1	PF12424	Plasma membrane calcium transporter ATPase C terminal	GO:0006816	calcium ion transport	GO:0005388	calcium-transporting ATPase activity	GO:0016529	sarcoplasmic reticulum	--	--
Cluster-1007.54641	1090	--	--	LC027342.1	Haliotis diversicolor genomic DNA, BAC clone: 006_rep_c2414	--	--	--	--	--	--	--	--	--	--	--	--	--	--
Cluster-1007.54642	320	--	--	LC027342.1	Haliotis diversicolor genomic DNA, BAC clone: 006_rep_c2414	--	--	--	--	--	--	--	--	--	--	--	--	--	--
Cluster-1007.54643	9143	XP_009050461.1	hypothetical protein LOTGIDRAFT_231195 [Lottia gigantea]>gi|556110177|gb|ESO98829.1| hypothetical protein LOTGIDRAFT_231195 [Lottia gigantea]	--	--	K04437	filamin	O75369	Filamin-B OS=Homo sapiens OX=9606 GN=FLNB PE=1 SV=2	PF00418//PF03776//PF01105//PF01349//PF01483	Tau and MAP protein, tubulin-binding repeat//Septum formation topological specificity factor MinE//emp24/gp25L/p24 family/GOLD//Flavivirus non-structural protein NS4B//Proprotein convertase P-domain	GO:0006370//GO:0009451//GO:0006508//GO:0006396//GO:0006810//GO:0051301//GO:0006144//GO:0032955	7-methylguanosine mRNA capping//RNA modification//proteolysis//RNA processing//transport//cell division//purine nucleobase metabolic process//regulation of barrier septum assembly	GO:0017111//GO:0004252//GO:0004483//GO:0016817//GO:0015631//GO:0004482//GO:0070008//GO:0003968	nucleoside-triphosphatase activity//serine-type endopeptidase activity//mRNA (nucleoside-2'-O-)-methyltransferase activity//hydrolase activity, acting on acid anhydrides//tubulin binding//mRNA (guanine-N7-)-methyltransferase activity//serine-type exopeptidase activity//RNA-directed RNA polymerase activity	GO:0045298//GO:0016021//GO:0031379	tubulin complex//integral component of membrane//RNA-directed RNA polymerase complex	KOG0518	Actin-binding cytoskeleton protein, filamin
Cluster-26776.0	610	XP_005099443.1	PREDICTED: nucleolysin TIAR-like isoform X4 [Aplysia californica]>gi|871235861|ref|XP_012938560.1| PREDICTED: nucleolysin TIAR-like isoform X4 [Aplysia californica]>gi|871235864|ref|XP_012938561.1| PREDICTED: nucleolysin TIAR-like isoform X4 [Aplysia californica]>gi|871235867|ref|XP_012938562.1| PREDICTED: nucleolysin TIAR-like isoform X4 [Aplysia californica]>gi|871235870|ref|XP_012938563.1| PRE…	--	--	--	--	--	--	--	--	--	--	--	--	--	--	--	--
Cluster-1212.0	671	--	--	--	--	--	--	--	--	--	--	--	--	--	--	--	--	--	--
Cluster-1007.59346	8295	XP_012936505.1	PREDICTED: polypyrimidine tract-binding protein 2-like isoform X4 [Aplysia californica]	XM_022458733.1	PREDICTED: Crassostrea virginica polypyrimidine tract-binding protein 1-like (LOC111118990), transcript variant X8, mRNA	K13218	polypyrimidine tract-binding protein 1	Q00438	Polypyrimidine tract-binding protein 1 OS=Rattus norvegicus OX=10116 GN=Ptbp1 PE=1 SV=1	PF00076//PF00939	RNA recognition motif. (a.k.a. RRM, RBD, or RNP domain)//Sodium:sulfate symporter transmembrane region	GO:0006810//GO:0055085//GO:0006814	transport//transmembrane transport//sodium ion transport	GO:0003676//GO:0005215	nucleic acid binding//transporter activity	GO:0016020	membrane	KOG1190	Polypyrimidine tract-binding protein
Cluster-1007.59347	281	XP_011495871.1	PREDICTED: polypyrimidine tract-binding protein 1 isoform X3 [Ceratosolen solmsi marchali]	--	--	--	--	--	--	--	--	--	--	--	--	--	--	--	--
Cluster-1007.59344	868	--	--	--	--	--	--	--	--	PF04977//PF04494//PF16331//PF00038//PF05529	Septum formation initiator//WD40 associated region in TFIID subunit, NTD2 domain//TolA binding protein trimerisation//Intermediate filament protein//B-cell receptor-associated protein 31-like	GO:0070206//GO:0007049//GO:0006355//GO:0006886	protein trimerization//cell cycle//regulation of transcription, DNA-templated//intracellular protein transport	GO:0005198	structural molecule activity	GO:0005783//GO:0005634//GO:0016021//GO:0005882	endoplasmic reticulum//nucleus//integral component of membrane//intermediate filament	--	--
Cluster-1007.59345	833	AHX37217.1	IkB-like protein [Haliotis discus discus]	KF498705.1	Haliotis discus discus IkB-like protein gene, complete cds	K09259	ankyrin only family, other	Q03017	NF-kappa-B inhibitor cactus OS=Drosophila melanogaster OX=7227 GN=cact PE=1 SV=2	PF00023//PF13606	Ankyrin repeat//Ankyrin repeat	--	--	GO:0005515	protein binding	--	--	--	--
Cluster-1007.59342	343	--	--	--	--	--	--	--	--	--	--	--	--	--	--	--	--	--	--
Cluster-1007.59343	540	--	--	--	--	--	--	--	--	--	--	--	--	--	--	--	--	--	--
Cluster-1007.59340	345	--	--	--	--	--	--	--	--	PF13833//PF00036//PF13202//PF13499//PF13405	EF-hand domain pair//EF hand//EF hand//EF-hand domain pair//EF-hand domain	--	--	GO:0005509	calcium ion binding	--	--	--	--
Cluster-1007.59341	277	--	--	--	--	--	--	--	--	--	--	--	--	--	--	--	--	--	--
Cluster-8215.0	249	--	445	--	--	--	--	--	--	--	--	--	--	--	--	--	--	--	--	--
Cluster-1007.78237	1073	--	--	LC027330.1	Haliotis diversicolor genomic DNA, BAC clone: 003_rep_c702	--	--	--	--	--	--	--	--	--	--	--	--	--	--
Cluster-1007.78236	3723	--	--	XM_020994680.1	PREDICTED: Phascolarctos cinereus asparaginyl-tRNA synthetase (NARS), transcript variant X2, mRNA	K01893	asparaginyl-tRNA synthetase	Q2KJG3	Asparagine--tRNA ligase, cytoplasmic OS=Bos taurus OX=9913 GN=NARS PE=2 SV=3	PF01336//PF00152	OB-fold nucleic acid binding domain//tRNA synthetases class II (D, K and N)	GO:0006418	tRNA aminoacylation for protein translation	GO:0005524//GO:0000166//GO:0003676//GO:0004812	ATP binding//nucleotide binding//nucleic acid binding//aminoacyl-tRNA ligase activity	--	--	KOG0555	Asparaginyl-tRNA synthetase
Cluster-1007.78235	3114	--	--	--	--	--	--	--	--	--	--	--	--	--	--	--	--	--	--
Cluster-1007.78234	5383	--	--	--	--	--	--	O42414	Neurofascin OS=Gallus gallus OX=9031 GN=NFASC PE=1 SV=1	PF05393//PF02480//PF06814//PF01561//PF13895//PF08633//PF04207	Human adenovirus early E3A glycoprotein//Alphaherpesvirus glycoprotein E//Lung seven transmembrane receptor//Hantavirus glycoprotein G2//Immunoglobulin domain//Rox3 mediator complex subunit//Tetrahydromethanopterin S-methyltransferase, subunit D	GO:0046656//GO:0006814//GO:0006357//GO:0030683	folic acid biosynthetic process//sodium ion transport//regulation of transcription from RNA polymerase II promoter//evasion or tolerance by virus of host immune response	GO:0005515//GO:0001104//GO:0030269	protein binding//RNA polymerase II transcription cofactor activity//tetrahydromethanopterin S-methyltransferase activity	GO:0019012//GO:0016021//GO:0005737//GO:0012506//GO:0016592//GO:0016020	virion//integral component of membrane//cytoplasm//vesicle membrane//mediator complex//membrane	--	--
Cluster-46047.0	939	--	--	--	--	K01830	prostaglandin-H2 D-isomerase	P46434	Glutathione S-transferase 1 (Fragment) OS=Onchocerca volvulus OX=6282 GN=GST1 PE=1 SV=1	PF02798//PF13417	Glutathione S-transferase, N-terminal domain//Glutathione S-transferase, N-terminal domain	--	--	GO:0005515	protein binding	--	--	--	--
Cluster-1007.78239	1185	--	--	LC027359.1	Haliotis diversicolor genomic DNA, BAC clone: 009_rep_c2378	--	--	--	--	--	--	--	--	--	--	--	--	--	--
Cluster-1007.78238	1577	--	--	--	--	K12947	signal peptidase complex subunit 2	Q5M8Y1	Probable signal peptidase complex subunit 2 OS=Xenopus tropicalis OX=8364 GN=spcs2 PE=2 SV=1	PF06703	Microsomal signal peptidase 25 kDa subunit (SPC25)	GO:0006465	signal peptide processing	GO:0008233	peptidase activity	GO:0016021//GO:0005787	integral component of membrane//signal peptidase complex	KOG4072	Signal peptidase complex, subunit SPC25
Cluster-37938.1	576	--	--	--	--	K01594	sulfinoalanine decarboxylase	Q64611	Cysteine sulfinic acid decarboxylase OS=Rattus norvegicus OX=10116 GN=Csad PE=1 SV=1	PF00282	Pyridoxal-dependent decarboxylase conserved domain	GO:0019752	carboxylic acid metabolic process	GO:0016831//GO:0030170	carboxy-lyase activity//pyridoxal phosphate binding	--	--	KOG0629	Glutamate decarboxylase and related proteins
Cluster-1007.34202	2024	--	--	--	--	K17199	Ras and EF-hand domain-containing protein	Q9BSW2	EF-hand calcium-binding domain-containing protein 4B OS=Homo sapiens OX=9606 GN=CRACR2A PE=1 SV=1	PF00036//PF01322//PF01593//PF13833//PF12763//PF05478//PF13202//PF13405//PF13499//PF10591	EF hand//Cytochrome C'//Flavin containing amine oxidoreductase//EF-hand domain pair//Cytoskeletal-regulatory complex EF hand//Prominin//EF hand//EF-hand domain//EF-hand domain pair//Secreted protein acidic and rich in cysteine Ca binding region	GO:0006118//GO:0007165//GO:0055114	obsolete electron transport//signal transduction//oxidation-reduction process	GO:0005515//GO:0009055//GO:0016491//GO:0005509//GO:0020037//GO:0005506	protein binding//electron carrier activity//oxidoreductase activity//calcium ion binding//heme binding//iron ion binding	GO:0016021//GO:0005578	integral component of membrane//proteinaceous extracellular matrix	--	--
Cluster-1007.34203	1752	--	--	--	--	--	--	--	--	--	--	--	--	--	--	--	--	--	--
Cluster-1007.34200	2271	--	--	--	--	--	--	--	--	--	--	--	--	--	--	--	--	--	--
Cluster-1007.34201	559	--	--	--	--	--	--	--	--	--	--	--	--	--	--	--	--	--	--
Cluster-1007.34206	1078	--	--	KJ160125.1	Haliotis tuberculata tuberculata microsatellite Haltub163 sequence	--	--	--	--	PF02558	Ketopantoate reductase PanE/ApbA	GO:0055114//GO:0015940	oxidation-reduction process//pantothenate biosynthetic process	GO:0008677	2-dehydropantoate 2-reductase activity	--	--	--	--
Cluster-1007.34207	338	--	--	--	--	--	--	--	--	--	--	--	--	--	--	--	--	--	--
Cluster-1007.34204	467	--	--	KT336367.1	Haliotis discus discus signal transducer and activator of transcription 5 (STAT5) gene, complete cds	--	--	--	--	--	--	--	--	--	--	--	--	--	--
Cluster-1007.34205	1148	--	--	KT336367.1	Haliotis discus discus signal transducer and activator of transcription 5 (STAT5) gene, complete cds	--	--	--	--	--	--	--	--	--	--	--	--	--	--
Cluster-1007.34208	4049	--	--	XM_006633757.2	PREDICTED: Lepisosteus oculatus C2 calcium-dependent domain containing 5 (c2cd5), transcript variant X8, mRNA	--	--	Q86YS7	C2 domain-containing protein 5 OS=Homo sapiens OX=9606 GN=C2CD5 PE=1 SV=1	PF16906//PF06973//PF00168//PF03007	Ribosomal proteins L26 eukaryotic, L24P archaeal//Domain of unknown function (DUF1297)//C2 domain//Wax ester synthase-like Acyl-CoA acyltransferase domain	GO:0042254//GO:0006188//GO:0045017//GO:0046486//GO:0006412//GO:0042967	ribosome biogenesis//IMP biosynthetic process//glycerolipid biosynthetic process//glycerolipid metabolic process//translation//acyl-carrier-protein biosynthetic process	GO:0003735//GO:0005515//GO:0000287//GO:0004144//GO:0016879//GO:0005524	structural constituent of ribosome//protein binding//magnesium ion binding//diacylglycerol O-acyltransferase activity//ligase activity, forming carbon-nitrogen bonds//ATP binding	GO:0015934//GO:0005840	large ribosomal subunit//ribosome	KOG1031	Predicted Ca2+-dependent phospholipid-binding protein
Cluster-1007.34209	812	--	--	--	--	--	--	--	--	--	--	--	--	--	--	--	--	--	--
Cluster-35518.0	5442	--	--	--	--	--	--	Q49LS8	XK-related protein 6 OS=Tetraodon nigroviridis OX=99883 GN=xkr6 PE=2 SV=1	PF05502//PF09815//PF02060//PF03184	Dynactin p62 family//XK-related protein//Slow voltage-gated potassium channel//DDE superfamily endonuclease	GO:0006813//GO:0006811	potassium ion transport//ion transport	GO:0005249//GO:0003676	voltage-gated potassium channel activity//nucleic acid binding	GO:0005869//GO:0016021//GO:0008076//GO:0016020	dynactin complex//integral component of membrane//voltage-gated potassium channel complex//membrane	--	--
Cluster-30875.0	398	--	--	--	--	--	--	--	--	--	--	--	--	--	--	--	--	--	--
Cluster-1007.66084	7950	--	--	XM_013084374.1	PREDICTED: Aplysia californica ankyrin repeat and sterile alpha motif domain-containing protein 1B-like (LOC101854647), mRNA	--	--	Q92625	Ankyrin repeat and SAM domain-containing protein 1A OS=Homo sapiens OX=9606 GN=ANKS1A PE=1 SV=4	PF13606//PF00536//PF00640//PF08416//PF07647//PF00023	Ankyrin repeat//SAM domain (Sterile alpha motif)//Phosphotyrosine interaction domain (PTB/PID)//Phosphotyrosine-binding domain//SAM domain (Sterile alpha motif)//Ankyrin repeat	--	--	GO:0005515	protein binding	--	--	--	--
Cluster-1007.33653	1129	--	--	AB177909.1	Haliotis discus hannai DNA, microsatellite marker Awb003	--	--	--	--	--	--	--	--	--	--	--	--	--	--
Cluster-1007.22302	252	--	--	--	--	--	--	--	--	--	--	--	--	--	--	--	--	--	--
Cluster-1007.125912	332	--	--	--	--	--	--	--	--	--	--	--	--	--	--	--	--	--	--
Cluster-1007.2422	551	--	--	--	--	--	--	--	--	PF03333	Adhesin biosynthesis transcription regulatory protein	GO:0006355	regulation of transcription, DNA-templated	--	--	--	--	--	--
Cluster-1007.2423	528	--	--	--	--	--	--	--	--	PF03333	Adhesin biosynthesis transcription regulatory protein	GO:0006355	regulation of transcription, DNA-templated	--	--	--	--	--	--
Cluster-1007.2420	244	--	--	--	--	--	--	--	--	--	--	--	--	--	--	--	--	--	--
Cluster-1007.2421	1838	--	--	--	--	--	--	--	--	--	--	--	--	--	--	--	--	--	--
Cluster-1007.2426	320	--	--	--	--	--	--	--	--	PF05509//PF01472//PF00333	TraY domain//PUA domain//Ribosomal protein S5, N-terminal domain	GO:0042254//GO:0006412//GO:0000746	ribosome biogenesis//translation//conjugation	GO:0003723//GO:0003735//GO:0003677	RNA binding//structural constituent of ribosome//DNA binding	GO:0005840	ribosome	--	--
Cluster-1007.2427	1026	--	--	--	--	--	--	--	--	PF01165	Ribosomal protein S21	GO:0042254//GO:0006412	ribosome biogenesis//translation	GO:0003735	structural constituent of ribosome	GO:0005840	ribosome	--	--
Cluster-1007.2424	1281	--	--	--	--	--	--	--	--	--	--	--	--	--	--	--	--	--	--
Cluster-1007.2425	4685	--	--	--	--	--	--	--	--	PF10371	Domain of unknown function	GO:0055114	oxidation-reduction process	GO:0016903	oxidoreductase activity, acting on the aldehyde or oxo group of donors	--	--	--	--
Cluster-16195.0	622	--	--	--	--	--	--	--	--	--	--	--	--	--	--	--	--	--	--
Cluster-16195.1	395	--	--	--	--	--	--	--	--	--	--	--	--	--	--	--	--	--	--
Cluster-1007.2428	2411	--	--	XM_010781731.1	PREDICTED: Notothenia coriiceps solute carrier family 4 (anion exchanger), member 2 (slc4a2), transcript variant X3, mRNA	K13855	solute carrier family 4 (anion exchanger), member 2	Q9Z0S8	Anion exchange protein 2 OS=Cavia porcellus OX=10141 GN=SLC4A2 PE=2 SV=1	PF06524//PF07565	NOA36 protein//Band 3 cytoplasmic domain	GO:0006820	anion transport	GO:0008270//GO:0008509	zinc ion binding//anion transmembrane transporter activity	GO:0016021//GO:0005634	integral component of membrane//nucleus	--	--
Cluster-1007.2429	901	--	--	--	--	--	--	--	--	--	--	--	--	--	--	--	--	--	--
Cluster-21477.0	459	--	--	--	--	--	--	--	--	PF04277	Oxaloacetate decarboxylase, gamma chain	GO:0006525//GO:0006560//GO:0006090//GO:0071436//GO:0006814	arginine metabolic process//proline metabolic process//pyruvate metabolic process//sodium ion export//sodium ion transport	GO:0015081//GO:0008948	sodium ion transmembrane transporter activity//oxaloacetate decarboxylase activity	GO:0016020	membrane	--	--
Cluster-43977.0	1832	--	--	--	--	K00485	dimethylaniline monooxygenase (N-oxide forming)	Q9EQ76	Dimethylaniline monooxygenase [N-oxide-forming] 3 OS=Rattus norvegicus OX=10116 GN=Fmo3 PE=1 SV=1	PF03325//PF00743	Herpesvirus polymerase accessory protein//Flavin-binding monooxygenase-like	GO:0055114//GO:0006260//GO:0019079	oxidation-reduction process//DNA replication//viral genome replication	GO:0030337//GO:0050661//GO:0050660//GO:0004499//GO:0003824	DNA polymerase processivity factor activity//NADP binding//flavin adenine dinucleotide binding//N,N-dimethylaniline monooxygenase activity//catalytic activity	GO:0042575	DNA polymerase complex	--	--
Cluster-32730.0	348	--	--	--	--	--	--	--	--	--	--	--	--	--	--	--	--	--	--
Cluster-1007.65193	717	--	--	--	--	--	--	--	--	--	--	--	--	--	--	--	--	--	--
Cluster-1007.8216	286	--	--	LC027341.1	Haliotis diversicolor genomic DNA, BAC clone: 006_rep_c2413	--	--	--	--	--	--	--	--	--	--	--	--	--	--
Cluster-1007.96141	2358	--	--	--	--	K10582	ubiquitin-conjugating enzyme E2 Q	Q9VM35	Ubiquitin-conjugating enzyme E2Q-like protein CG4502 OS=Drosophila melanogaster OX=7227 GN=CG4502 PE=2 SV=1	PF04147//PF11705//PF04546//PF04931//PF04281//PF05773	Nop14-like family//DNA-directed RNA polymerase III subunit Rpc31//Sigma-70, non-essential region//DNA polymerase phi//Mitochondrial import receptor subunit Tom22//RWD domain	GO:0006352//GO:0006260//GO:0006351//GO:0006359//GO:0006886//GO:0006355	DNA-templated transcription, initiation//DNA replication//transcription, DNA-templated//regulation of transcription from RNA polymerase III promoter//intracellular protein transport//regulation of transcription, DNA-templated	GO:0003677//GO:0005515//GO:0003887//GO:0016987//GO:0003700	DNA binding//protein binding//DNA-directed DNA polymerase activity//sigma factor activity//transcription factor activity, sequence-specific DNA binding	GO:0032040//GO:0005741//GO:0005667//GO:0042575	small-subunit processome//mitochondrial outer membrane//transcription factor complex//DNA polymerase complex	KOG0897	Predicted ubiquitin-conjugating enzyme
Cluster-1007.96140	241	--	--	JQ906782.1	Haliotis diversicolor hypothetical protein gene, complete cds	--	--	--	--	--	--	--	--	--	--	--	--	--	--
Cluster-1007.96143	350	--	--	GU995621.1	Haliotis discus hannai clone CH1839 microsatellite sequence	--	--	--	--	--	--	--	--	--	--	--	--	--	--
Cluster-1007.96142	430	--	--	LC027294.1	Haliotis diversicolor genomic DNA, BAC clone: 001_rep_c977	--	--	--	--	--	--	--	--	--	--	--	--	--	--
Cluster-1007.96145	2515	--	--	LC027342.1	Haliotis diversicolor genomic DNA, BAC clone: 006_rep_c2414	--	--	--	--	--	--	--	--	--	--	--	--	--	--
Cluster-1007.96144	2147	--	--	--	--	--	--	--	--	--	--	--	--	--	--	--	--	--	--
Cluster-1007.96147	3642	--	--	LC027350.1	Haliotis diversicolor genomic DNA, BAC clone: 008_rep_c1012	K03372	MFS transporter, PAT family, solute carrier family 33 (acetyl-CoA transportor), member 1	Q6AYY8	Acetyl-coenzyme A transporter 1 OS=Rattus norvegicus OX=10116 GN=Slc33a1 PE=2 SV=1	PF13000	Acetyl-coenzyme A transporter 1	GO:0015876	acetyl-CoA transport	GO:0008521	acetyl-CoA transporter activity	GO:0016021	integral component of membrane	KOG3574	Acetyl-CoA transporter
Cluster-1007.96146	4426	--	--	LC027332.1	Haliotis diversicolor genomic DNA, BAC clone: 004_rep_c861	--	--	--	--	--	--	--	--	--	--	--	--	--	--
Cluster-1007.96149	782	--	--	KT336367.1	Haliotis discus discus signal transducer and activator of transcription 5 (STAT5) gene, complete cds	--	--	--	--	--	--	--	--	--	--	--	--	--	--
Cluster-1007.96148	955	--	--	--	--	--	--	A2ASS6	Titin OS=Mus musculus OX=10090 GN=Ttn PE=1 SV=1	PF16656//PF00041	Purple acid Phosphatase, N-terminal domain//Fibronectin type III domain	GO:0006771//GO:0019497	riboflavin metabolic process//hexachlorocyclohexane metabolic process	GO:0046872//GO:0005515//GO:0003993	metal ion binding//protein binding//acid phosphatase activity	--	--	--	--
Cluster-23670.0	238	--	--	AC194815.8	Rhesus Macaque BAC CH250-174M14 () complete sequence	--	--	Q8N7I0	Protein GVQW1 OS=Homo sapiens OX=9606 GN=GVQW1 PE=2 SV=1	--	--	--	--	--	--	--	--	--	--
Cluster-23670.1	256	--	--	AL109965.34	Human DNA sequence from clone RP5-1121G12 on chromosome 20, complete sequence	--	--	Q6UX73	UPF0764 protein C16orf89 OS=Homo sapiens OX=9606 GN=C16orf89 PE=1 SV=2	--	--	--	--	--	--	--	--	--	--
Cluster-23670.2	210	--	--	AC026224.6	Homo sapiens chromosome 10 clone RP11-74N14, complete sequence	K17985	activating molecule in BECN1-regulated autophagy protein 1	Q96MD7	Uncharacterized protein C9orf85 OS=Homo sapiens OX=9606 GN=C9orf85 PE=1 SV=1	--	--	--	--	--	--	--	--	--	--
Cluster-1007.138493	2338	--	--	--	--	--	--	--	--	--	--	--	--	--	--	--	--	--	--
Cluster-6549.1	1061	--	--	--	--	--	--	--	--	--	--	--	--	--	--	--	--	--	--
Cluster-6549.0	420	--	--	--	--	K12302	MFS transporter, ACS family, solute carrier family 17 (sodium-dependent inorganic phosphate cotransporter), member 6/7/8	Q8BFU8	Vesicular glutamate transporter 3 OS=Mus musculus OX=10090 GN=Slc17a8 PE=2 SV=1	PF07690//PF03092	Major Facilitator Superfamily//BT1 family	GO:0006810//GO:0055085	transport//transmembrane transport	--	--	GO:0016021	integral component of membrane	KOG2532	Permease of the major facilitator superfamily
Cluster-6549.2	391	--	--	--	--	--	--	--	--	--	--	--	--	--	--	--	--	--	--
Cluster-34194.0	653	--	--	--	--	--	--	Q9GPR3	TM2 domain-containing protein DDB_G0277895 OS=Dictyostelium discoideum OX=44689 GN=DDB_G0277895 PE=3 SV=1	--	--	--	--	--	--	--	--	--	--
Cluster-5331.0	1665	--	--	XM_008363113.2	PREDICTED: Malus x domestica UDP-glucuronate 4-epimerase 1 (LOC103425033), mRNA	--	--	Q9M0B6	UDP-glucuronate 4-epimerase 1 OS=Arabidopsis thaliana OX=3702 GN=GAE1 PE=1 SV=1	PF01370//PF01073//PF08241//PF00106	NAD dependent epimerase/dehydratase family//3-beta hydroxysteroid dehydrogenase/isomerase family//Methyltransferase domain//short chain dehydrogenase	GO:0006694//GO:0008152//GO:0008209//GO:0055114//GO:0008207//GO:0008210	steroid biosynthetic process//metabolic process//androgen metabolic process//oxidation-reduction process//C21-steroid hormone metabolic process//estrogen metabolic process	GO:0016491//GO:0050662//GO:0003824//GO:0003854//GO:0016616//GO:0008168	oxidoreductase activity//coenzyme binding//catalytic activity//3-beta-hydroxy-delta5-steroid dehydrogenase activity//oxidoreductase activity, acting on the CH-OH group of donors, NAD or NADP as acceptor//methyltransferase activity	--	--	KOG1371	UDP-glucose 4-epimerase/UDP-sulfoquinovose synthase
Cluster-4543.0	648	--	--	--	--	--	--	--	--	--	--	--	--	--	--	--	--	--	--
Cluster-38376.0	1344	--	--	--	--	--	--	--	--	PF12356	Protein of unknown function (DUF3643)	GO:0006915//GO:0016567//GO:0032465	apoptotic process//protein ubiquitination//regulation of cytokinesis	GO:0004842	ubiquitin-protein transferase activity	--	--	--	--
Cluster-1007.70474	2340	--	--	XM_004619423.1	PREDICTED: Sorex araneus coiled-coil domain containing 94 (CCDC94), mRNA	--	--	Q9BW85	Coiled-coil domain-containing protein 94 OS=Homo sapiens OX=9606 GN=CCDC94 PE=1 SV=1	PF03592//PF09057	Terminase small subunit//Second Mitochondria-derived Activator of Caspases	GO:0006919//GO:0006915//GO:0006323	activation of cysteine-type endopeptidase activity involved in apoptotic process//apoptotic process//DNA packaging	--	--	GO:0005739	mitochondrion	KOG2989	Uncharacterized conserved protein
Cluster-30476.0	526	--	--	--	--	--	--	--	--	PF02276	Photosynthetic reaction centre cytochrome C subunit	GO:0006118//GO:0019684	obsolete electron transport//photosynthesis, light reaction	GO:0009055//GO:0020037//GO:0005506	electron carrier activity//heme binding//iron ion binding	GO:0030077	plasma membrane light-harvesting complex	--	--
Cluster-1007.70477	796	--	--	--	--	--	--	P86737	Uncharacterized protein 3 (Fragment) OS=Haliotis asinina OX=109174 PE=1 SV=1	--	--	--	--	--	--	--	--	--	--
Cluster-1007.37579	804	--	--	--	--	--	--	--	--	--	--	--	--	--	--	--	--	--	--
Cluster-1007.37578	458	--	--	--	--	--	--	--	--	--	--	--	--	--	--	--	--	--	--
Cluster-38219.1	1179	--	--	XM_022246141.1	PREDICTED: Acanthaster planci kinesin-like protein KIF1A (LOC110985244), transcript variant X13, mRNA	K17915	kinesin family member 14	L0N7N1	Kinesin-like protein KIF14 OS=Mus musculus OX=10090 GN=Kif14 PE=1 SV=1	PF00498//PF00225//PF04310//PF08214	FHA domain//Kinesin motor domain//MukB N-terminal//Histone acetylation protein	GO:0030261//GO:0016573//GO:0007017//GO:0007059//GO:0007018//GO:0042967//GO:0006355	chromosome condensation//histone acetylation//microtubule-based process//chromosome segregation//microtubule-based movement//acyl-carrier-protein biosynthetic process//regulation of transcription, DNA-templated	GO:0004402//GO:0003677//GO:0005515//GO:0008017//GO:0003777//GO:0005524	histone acetyltransferase activity//DNA binding//protein binding//microtubule binding//microtubule motor activity//ATP binding	GO:0000123//GO:0009295//GO:0045298//GO:0005874	histone acetyltransferase complex//nucleoid//tubulin complex//microtubule	KOG0245	Kinesin-like protein
Cluster-1007.70476	2388	--	--	KF554145.1	Haliotis discus discus peptidoglycan recognition protein (PGRP) gene, complete cds	--	--	--	--	PF00341	PDGF/VEGF domain	GO:0040007//GO:0008283//GO:0007165	growth//cell proliferation//signal transduction	GO:0008083	growth factor activity	GO:0016020	membrane	--	--
Cluster-1007.77163	425	--	--	--	--	--	--	--	--	PF00041	Fibronectin type III domain	--	--	GO:0005515	protein binding	--	--	--	--
Cluster-1007.37571	3313	--	--	--	--	K04398	caspase 8	Q14790	Caspase-8 OS=Homo sapiens OX=9606 GN=CASP8 PE=1 SV=1	PF00619//PF13718//PF00656	Caspase recruitment domain//GNAT acetyltransferase 2//Caspase domain	GO:0006508//GO:0042981//GO:0042967	proteolysis//regulation of apoptotic process//acyl-carrier-protein biosynthetic process	GO:0004197//GO:0008080	cysteine-type endopeptidase activity//N-acetyltransferase activity	--	--	--	--
Cluster-1007.37570	2488	--	--	--	--	--	--	P42573	Cell death protein 3 OS=Caenorhabditis elegans OX=6239 GN=ced-3 PE=1 SV=2	--	--	--	--	--	--	--	--	--	--
Cluster-1007.37573	494	--	--	--	--	--	--	--	--	--	--	--	--	--	--	--	--	--	--
Cluster-1007.37572	1529	--	--	--	--	K07200	5'-AMP-activated protein kinase, regulatory gamma subunit	Q91WG5	5'-AMP-activated protein kinase subunit gamma-2 OS=Mus musculus OX=10090 GN=Prkag2 PE=1 SV=2	PF02119	Flagellar P-ring protein	GO:0071973	bacterial-type flagellum-dependent cell motility	GO:0005198	structural molecule activity	GO:0030288//GO:0009428	outer membrane-bounded periplasmic space//bacterial-type flagellum basal body, distal rod, P ring	KOG1764	5'-AMP-activated protein kinase, gamma subunit
Cluster-1007.37575	476	--	--	--	--	--	--	--	--	--	--	--	--	--	--	--	--	--	--
Cluster-1007.37574	2316	--	--	--	--	K07200	5'-AMP-activated protein kinase, regulatory gamma subunit	Q91WG5	5'-AMP-activated protein kinase subunit gamma-2 OS=Mus musculus OX=10090 GN=Prkag2 PE=1 SV=2	PF02119	Flagellar P-ring protein	GO:0071973	bacterial-type flagellum-dependent cell motility	GO:0005198	structural molecule activity	GO:0009428//GO:0030288	bacterial-type flagellum basal body, distal rod, P ring//outer membrane-bounded periplasmic space	KOG1764	5'-AMP-activated protein kinase, gamma subunit
Cluster-1007.37577	437	--	--	--	--	--	--	--	--	--	--	--	--	--	--	--	--	--	--
Cluster-1007.37576	5478	--	--	--	--	K14388	solute carrier family 5 (sodium-coupled monocarboxylate transporter), member 8/12	Q49B93	Sodium-coupled monocarboxylate transporter 2 OS=Mus musculus OX=10090 GN=Slc5a12 PE=1 SV=1	PF00474//PF10716	Sodium:solute symporter family//NADH dehydrogenase transmembrane subunit	GO:0055085//GO:0055114//GO:0006810//GO:0006118	transmembrane transport//oxidation-reduction process//transport//obsolete electron transport	GO:0016655//GO:0005215	oxidoreductase activity, acting on NAD(P)H, quinone or similar compound as acceptor//transporter activity	GO:0016020	membrane	--	--
Cluster-30403.0	587	--	--	--	--	--	--	--	--	--	--	--	--	--	--	--	--	--	--
Cluster-1007.77161	263	--	--	--	--	--	--	--	--	PF00041	Fibronectin type III domain	--	--	GO:0005515	protein binding	--	--	--	--
Cluster-1007.50361	4808	--	--	LC027337.1	Haliotis diversicolor genomic DNA, BAC clone: 005_rep_c2730	--	--	Q9FWW9	Flavin-containing monooxygenase FMO GS-OX-like 2 OS=Arabidopsis thaliana OX=3702 GN=At1g12200 PE=2 SV=1	PF00743//PF07992//PF00070//PF06689	Flavin-binding monooxygenase-like//Pyridine nucleotide-disulphide oxidoreductase//Pyridine nucleotide-disulphide oxidoreductase//ClpX C4-type zinc finger	GO:0055114	oxidation-reduction process	GO:0050660//GO:0046983//GO:0016491//GO:0004499//GO:0050661//GO:0008270	flavin adenine dinucleotide binding//protein dimerization activity//oxidoreductase activity//N,N-dimethylaniline monooxygenase activity//NADP binding//zinc ion binding	--	--	--	--
Cluster-1007.50360	278	--	--	LC027322.1	Haliotis diversicolor genomic DNA, BAC clone: 002_c22	--	--	--	--	--	--	--	--	--	--	--	--	--	--
Cluster-1007.138491	1868	--	--	--	--	--	--	--	--	PF05404//PF00097	Translocon-associated protein, delta subunit precursor (TRAP-delta)//Zinc finger, C3HC4 type (RING finger)	--	--	GO:0046872	metal ion binding	GO:0005783//GO:0016021	endoplasmic reticulum//integral component of membrane	--	--
Cluster-43857.1	1950	--	--	--	--	--	--	--	--	--	--	--	--	--	--	--	--	--	--
Cluster-40553.0	1029	--	--	--	--	--	--	--	--	--	--	--	--	--	--	--	--	--	--
Cluster-1007.102089	814	--	--	--	--	--	--	--	--	--	--	--	--	--	--	--	--	--	--
Cluster-1007.102088	852	--	--	XM_012824947.1	PREDICTED: Clupea harengus eukaryotic translation initiation factor 2, subunit 2 beta, 38kDa (eif2s2), mRNA	K03238	translation initiation factor 2 subunit 2	Q99L45	Eukaryotic translation initiation factor 2 subunit 2 OS=Mus musculus OX=10090 GN=Eif2s2 PE=1 SV=1	PF01698//PF01873	Floricaula / Leafy protein//Domain found in IF2B/IF5	GO:0006355//GO:0006446//GO:0006413	regulation of transcription, DNA-templated//regulation of translational initiation//translational initiation	GO:0003743//GO:0003677	translation initiation factor activity//DNA binding	GO:0005840	ribosome	KOG2768	Translation initiation factor 2, beta subunit (eIF-2beta)
Cluster-1007.102081	2956	--	--	--	--	--	--	A0MZ66	Shootin-1 OS=Homo sapiens OX=9606 GN=SHTN1 PE=1 SV=4	PF17078//PF06657//PF04632//PF00787//PF06160//PF07820	SWI5-dependent HO expression protein 3//Centrosome microtubule-binding domain of Cep57//Fusaric acid resistance protein family//PX domain//Septation ring formation regulator, EzrA//TraC-like protein	GO:0006810//GO:0048309//GO:0000921//GO:0000746//GO:0051028	transport//endoplasmic reticulum inheritance//septin ring assembly//conjugation//mRNA transport	GO:0008017//GO:0035091	microtubule binding//phosphatidylinositol binding	GO:0016021//GO:0005886//GO:0005940//GO:0045298	integral component of membrane//plasma membrane//septin ring//tubulin complex	--	--
Cluster-1007.102080	1121	--	--	--	--	K04392	Ras-related C3 botulinum toxin substrate 1	Q09914	GTP-binding protein rho1 OS=Schizosaccharomyces pombe (strain 972 / ATCC 24843) OX=284812 GN=rho1 PE=2 SV=1	PF08477//PF03193//PF00071	Ras of Complex, Roc, domain of DAPkinase//Protein of unknown function, DUF258//Ras family	GO:0007264	small GTPase mediated signal transduction	GO:0005525//GO:0003924	GTP binding//GTPase activity	--	--	KOG0393	Ras-related small GTPase, Rho type
Cluster-1007.102083	652	--	--	LC027310.1	Haliotis diversicolor genomic DNA, BAC clone: 002_c10	--	--	--	--	--	--	--	--	--	--	--	--	--	--
Cluster-1007.102082	1012	--	--	--	--	--	--	--	--	--	--	--	--	--	--	--	--	--	--
Cluster-1007.102085	834	--	--	--	--	--	--	--	--	--	--	--	--	--	--	--	--	--	--
Cluster-1007.102084	4278	--	--	XM_011594237.1	PREDICTED: Aquila chrysaetos canadensis Fanconi anemia, complementation group I (FANCI), mRNA	--	--	Q9NVI1	Fanconi anemia group I protein OS=Homo sapiens OX=9606 GN=FANCI PE=1 SV=4	PF04147//PF06179//PF06512	Nop14-like family//Surfeit locus protein 5 subunit 22 of Mediator complex//Sodium ion transport-associated	GO:0006357//GO:0006814	regulation of transcription from RNA polymerase II promoter//sodium ion transport	GO:0005248//GO:0001104	voltage-gated sodium channel activity//RNA polymerase II transcription cofactor activity	GO:0016592//GO:0032040//GO:0001518	mediator complex//small-subunit processome//voltage-gated sodium channel complex	KOG4553	Uncharacterized conserved protein
Cluster-1007.102087	804	--	--	LC027358.1	Haliotis diversicolor genomic DNA, BAC clone: 009_rep_c2377	--	--	--	--	--	--	--	--	--	--	--	--	--	--
Cluster-1007.102086	824	--	--	--	--	--	--	--	--	--	--	--	--	--	--	--	--	--	--
Cluster-1007.138490	614	--	--	--	--	--	--	--	--	--	--	--	--	--	--	--	--	--	--
Cluster-1007.77169	389	--	--	GU995894.1	Haliotis discus hannai microsatellite CHh132 sequence	--	--	--	--	PF13895	Immunoglobulin domain	--	--	GO:0005515	protein binding	--	--	--	--
Cluster-1007.38879	4131	--	--	--	--	--	--	--	--	--	--	--	--	--	--	--	--	--	--
Cluster-1007.38878	257	--	--	--	--	--	--	--	--	--	--	--	--	--	--	--	--	--	--
Cluster-1007.38875	1331	--	--	--	--	--	--	--	--	PF04443	Acyl-protein synthetase, LuxE	GO:0008218	bioluminescence	GO:0047474	long-chain fatty acid luciferin component ligase activity	--	--	--	--
Cluster-1007.38874	305	--	--	--	--	--	--	--	--	--	--	--	--	--	--	--	--	--	--
Cluster-1007.38877	1611	--	--	--	--	--	--	--	--	--	--	--	--	--	--	--	--	--	--
Cluster-1007.38876	752	--	--	--	--	--	--	--	--	--	--	--	--	--	--	--	--	--	--
Cluster-1007.38871	334	--	--	--	--	--	--	--	--	--	--	--	--	--	--	--	--	--	--
Cluster-1007.38870	619	--	--	--	--	K18164	NADH dehydrogenase	Q7L592	Protein arginine methyltransferase NDUFAF7, mitochondrial OS=Homo sapiens OX=9606 GN=NDUFAF7 PE=1 SV=1	--	--	--	--	--	--	--	--	KOG2901	Uncharacterized conserved protein
Cluster-1007.38873	1780	--	--	--	--	--	--	--	--	--	--	--	--	--	--	--	--	--	--
Cluster-1007.38872	418	--	--	--	--	--	--	--	--	--	--	--	--	--	--	--	--	--	--
Cluster-41291.0	831	--	--	--	--	K14621	phospholipase B1, membrane-associated	Q06HQ7	Phospholipase B1, membrane-associated OS=Monodelphis domestica OX=13616 GN=PLB1 PE=2 SV=1	--	--	--	--	--	--	--	--	KOG3670	Phospholipase
Cluster-1007.120951	388	--	--	HQ529712.1	Haliotis diversicolor cysteine aspartic acid-specific protease gene, complete cds	--	--	--	--	--	--	--	--	--	--	--	--	--	--
Cluster-18570.0	579	--	--	--	--	--	--	--	--	--	--	--	--	--	--	--	--	--	--
Cluster-848.0	543	--	--	--	--	--	--	P92523	Uncharacterized mitochondrial protein AtMg00860 OS=Arabidopsis thaliana OX=3702 GN=AtMg00860 PE=4 SV=1	--	--	--	--	--	--	--	--	--	--
Cluster-1007.143548	615	--	--	--	--	--	--	--	--	--	--	--	--	--	--	--	--	--	--
Cluster-3879.0	213	--	--	--	--	--	--	--	--	--	--	--	--	--	--	--	--	--	--
Cluster-32645.0	1339	--	--	LC027339.1	Haliotis diversicolor genomic DNA, BAC clone: 006_rep_c2411	--	--	--	--	--	--	--	--	--	--	--	--	--	--
Cluster-217.0	272	--	--	KU096999.1	Abalone herpesvirus Taiwan/2005, complete genome	--	--	--	--	PF00711	Beta defensin	GO:0006952	defense response	--	--	GO:0005576	extracellular region	--	--
Cluster-8309.0	581	--	--	--	--	--	--	--	--	PF00036//PF13405//PF13202//PF13499//PF13833//PF10591	EF hand//EF-hand domain//EF hand//EF-hand domain pair//EF-hand domain pair//Secreted protein acidic and rich in cysteine Ca binding region	GO:0007165	signal transduction	GO:0005509	calcium ion binding	GO:0005578	proteinaceous extracellular matrix	--	--
Cluster-44742.1	7515	--	--	--	--	--	--	Q2PZL6	Protocadherin Fat 4 OS=Mus musculus OX=10090 GN=Fat4 PE=1 SV=2	PF04879//PF01290//PF00028//PF01325	Molybdopterin oxidoreductase Fe4S4 domain//Thymosin beta-4 family//Cadherin domain//Iron dependent repressor, N-terminal DNA binding domain	GO:0055114//GO:0007156//GO:0007015	oxidation-reduction process//homophilic cell adhesion via plasma membrane adhesion molecules//actin filament organization	GO:0003785//GO:0003677//GO:0016491//GO:0005509	actin monomer binding//DNA binding//oxidoreductase activity//calcium ion binding	GO:0016020	membrane	--	--
Cluster-44742.0	3514	--	--	--	--	--	--	B8V7Q1	Protocadherin-like protein OS=Acropora millepora OX=45264 PE=1 SV=1	PF00028	Cadherin domain	GO:0007156	homophilic cell adhesion via plasma membrane adhesion molecules	GO:0005509	calcium ion binding	GO:0016020	membrane	--	--
Cluster-44742.3	706	--	--	--	--	--	--	Q9VW71	Fat-like cadherin-related tumor suppressor homolog OS=Drosophila melanogaster OX=7227 GN=kug PE=2 SV=3	PF00028	Cadherin domain	GO:0007156	homophilic cell adhesion via plasma membrane adhesion molecules	GO:0005509	calcium ion binding	GO:0016020	membrane	KOG4289	Cadherin EGF LAG seven-pass G-type receptor
Cluster-44742.2	579	--	--	--	--	K16503	cadherin-related family member 3	Q9Y5H4	Protocadherin gamma-A1 OS=Homo sapiens OX=9606 GN=PCDHGA1 PE=2 SV=1	PF00028	Cadherin domain	GO:0007156	homophilic cell adhesion via plasma membrane adhesion molecules	GO:0005509	calcium ion binding	GO:0016020	membrane	--	--
Cluster-44742.4	5425	--	--	--	--	--	--	Q6V0I7	Protocadherin Fat 4 OS=Homo sapiens OX=9606 GN=FAT4 PE=1 SV=2	PF00028//PF01290	Cadherin domain//Thymosin beta-4 family	GO:0007156//GO:0007015	homophilic cell adhesion via plasma membrane adhesion molecules//actin filament organization	GO:0005509//GO:0003785	calcium ion binding//actin monomer binding	GO:0016020	membrane	--	--
Cluster-33897.0	3125	--	--	--	--	--	--	--	--	--	--	--	--	--	--	--	--	--	--
Cluster-33897.1	1529	--	--	--	--	--	--	B3A0P4	Uncharacterized shell protein 26 (Fragment) OS=Lottia gigantea OX=225164 PE=1 SV=1	PF08168//PF00091	NUC205 domain//Tubulin/FtsZ family, GTPase domain	--	--	GO:0003924	GTPase activity	GO:0005634	nucleus	--	--
Cluster-1007.66843	4424	--	--	--	--	--	--	P82094	TATA element modulatory factor OS=Homo sapiens OX=9606 GN=TMF1 PE=1 SV=2	PF04508//PF04977	Viral A-type inclusion protein repeat//Septum formation initiator	GO:0007049//GO:0016032	cell cycle//viral process	--	--	--	--	KOG4673	Transcription factor TMF, TATA element modulatory factor
Cluster-1007.66842	4460	--	--	--	--	--	--	P82094	TATA element modulatory factor OS=Homo sapiens OX=9606 GN=TMF1 PE=1 SV=2	PF04977//PF04508	Septum formation initiator//Viral A-type inclusion protein repeat	GO:0007049//GO:0016032	cell cycle//viral process	--	--	--	--	KOG4673	Transcription factor TMF, TATA element modulatory factor
Cluster-1007.66841	3120	--	--	EF103399.1	Haliotis discus discus putative mitochondrial ATP synthase mRNA, complete cds; nuclear gene for mitochondrial product	K02138	F-type H+-transporting ATPase subunit d	Q24251	ATP synthase subunit d, mitochondrial OS=Drosophila melanogaster OX=7227 GN=ATPsynD PE=2 SV=2	PF14554	VEGF heparin-binding domain	--	--	GO:0008201	heparin binding	--	--	KOG3366	Mitochondrial F1F0-ATP synthase, subunit d/ATP7
Cluster-1007.66840	458	--	--	XM_021331155.1	PREDICTED: Helicoverpa armigera 60S ribosomal protein L23 (LOC110373793), mRNA	K02894	large subunit ribosomal protein L23e	Q9GNE2	60S ribosomal protein L23 OS=Aedes aegypti OX=7159 GN=RpL23-A PE=2 SV=1	PF00238	Ribosomal protein L14p/L23e	GO:0042254//GO:0006412	ribosome biogenesis//translation	GO:0003735	structural constituent of ribosome	GO:0005840	ribosome	KOG0901	60S ribosomal protein L14/L17/L23
Cluster-1007.66847	206	--	--	--	--	--	--	--	--	--	--	--	--	--	--	--	--	--	--
Cluster-1007.66846	3174	--	--	HQ650340.1	Haliotis diversicolor clone Hdi243 microsatellite sequence	K08002	matrix metalloproteinase-24 (membrane-inserted)	Q9XSZ5	Interstitial collagenase OS=Equus caballus OX=9796 GN=MMP1 PE=2 SV=1	PF00413//PF01400	Matrixin//Astacin (Peptidase family M12A)	GO:0006508	proteolysis	GO:0008270//GO:0004222	zinc ion binding//metalloendopeptidase activity	GO:0031012	extracellular matrix	--	--
Cluster-1007.66845	7326	--	--	XM_013085419.1	PREDICTED: Aplysia californica cilia- and flagella-associated protein 44-like (LOC101850662), mRNA	--	--	Q96MT7	Cilia- and flagella-associated protein 44 OS=Homo sapiens OX=9606 GN=CFAP44 PE=1 SV=1	PF05297//PF00400//PF04625	Herpesvirus latent membrane protein 1 (LMP1)//WD domain, G-beta repeat//DEC-1 protein, N-terminal region	GO:0007304//GO:0019087	chorion-containing eggshell formation//transformation of host cell by virus	GO:0005213//GO:0005515	structural constituent of chorion//protein binding	GO:0042600//GO:0016021//GO:0005576	chorion//integral component of membrane//extracellular region	--	--
Cluster-1007.66844	7324	--	--	XM_013085419.1	PREDICTED: Aplysia californica cilia- and flagella-associated protein 44-like (LOC101850662), mRNA	--	--	Q96MT7	Cilia- and flagella-associated protein 44 OS=Homo sapiens OX=9606 GN=CFAP44 PE=1 SV=1	PF00400//PF05297//PF04625	WD domain, G-beta repeat//Herpesvirus latent membrane protein 1 (LMP1)//DEC-1 protein, N-terminal region	GO:0007304//GO:0019087	chorion-containing eggshell formation//transformation of host cell by virus	GO:0005213//GO:0005515	structural constituent of chorion//protein binding	GO:0042600//GO:0016021//GO:0005576	chorion//integral component of membrane//extracellular region	--	--
Cluster-1007.66849	5235	--	--	--	--	--	--	--	--	PF04828	Glutathione-dependent formaldehyde-activating enzyme	GO:0008152	metabolic process	GO:0016846	carbon-sulfur lyase activity	--	--	--	--
Cluster-1007.66848	3356	--	--	--	--	K17903	calcipressin-2	Q2KIA1	Calcipressin-3 OS=Bos taurus OX=9913 GN=RCAN3 PE=2 SV=1	PF04847	Calcipressin	GO:0019722	calcium-mediated signaling	--	--	--	--	KOG4019	Calcineurin-mediated signaling pathway inhibitor DSCR1
Cluster-1007.120959	947	--	--	--	--	--	--	--	--	PF04139	Rad9	GO:0000077	DNA damage checkpoint	--	--	GO:0030896	checkpoint clamp complex	--	--
Cluster-7848.0	366	--	--	LC027342.1	Haliotis diversicolor genomic DNA, BAC clone: 006_rep_c2414	--	--	--	--	--	--	--	--	--	--	--	--	--	--
Cluster-1007.120958	2843	--	--	--	--	K00517	--	Q09660	Probable cytochrome P450 CYP44 OS=Caenorhabditis elegans OX=6239 GN=cyp-44A1 PE=3 SV=2	PF00067//PF06990//PF01566	Cytochrome P450//Galactose-3-O-sulfotransferase//Natural resistance-associated macrophage protein	GO:0055114//GO:0009058//GO:0006810//GO:0006687	oxidation-reduction process//biosynthetic process//transport//glycosphingolipid metabolic process	GO:0016705//GO:0020037//GO:0005506//GO:0001733//GO:0005215	oxidoreductase activity, acting on paired donors, with incorporation or reduction of molecular oxygen//heme binding//iron ion binding//galactosylceramide sulfotransferase activity//transporter activity	GO:0016020//GO:0005794//GO:0016021	membrane//Golgi apparatus//integral component of membrane	KOG0159	Cytochrome P450 CYP11/CYP12/CYP24/CYP27 subfamilies
Cluster-1402.0	1411	--	--	KU096999.1	Abalone herpesvirus Taiwan/2005, complete genome	--	--	--	--	--	--	--	--	--	--	--	--	--	--
Cluster-30889.0	1561	--	--	--	--	--	--	--	--	--	--	--	--	--	--	--	--	--	--
Cluster-27122.2	1823	--	--	DQ277993.1	Haliotis rubra clone Hrub1.D12 microsatellite sequence	--	--	P07033	Acylphosphatase-2 OS=Bos taurus OX=9913 GN=ACYP2 PE=1 SV=2	--	--	--	--	--	--	--	--	--	--
Cluster-27122.3	940	--	--	DQ277993.1	Haliotis rubra clone Hrub1.D12 microsatellite sequence	K01512	acylphosphatase	P56375	Acylphosphatase-2 OS=Mus musculus OX=10090 GN=Acyp2 PE=1 SV=2	--	--	--	--	--	--	--	--	--	--
Cluster-27122.0	923	--	--	--	--	--	--	--	--	--	--	--	--	--	--	--	--	--	--
Cluster-1007.17199	511	--	--	--	--	--	--	--	--	--	--	--	--	--	--	--	--	--	--
Cluster-1007.138494	2393	--	--	--	--	--	--	--	--	--	--	--	--	--	--	--	--	--	--
Cluster-32417.0	3471	--	--	--	--	--	--	P83472	Chymotrypsin inhibitor OS=Lumbricus terrestris OX=6398 PE=1 SV=2	PF00280	Potato inhibitor I family	GO:0009611	response to wounding	GO:0004867	serine-type endopeptidase inhibitor activity	--	--	--	--
Cluster-37376.0	2786	--	--	--	--	K05970	sialate O-acetylesterase	Q9HAT2	Sialate O-acetylesterase OS=Homo sapiens OX=9606 GN=SIAE PE=1 SV=1	--	--	--	--	--	--	--	--	--	--
Cluster-1007.121087	597	--	--	--	--	--	--	--	--	--	--	--	--	--	--	--	--	--	--
Cluster-23370.0	451	--	--	--	--	--	--	--	--	--	--	--	--	--	--	--	--	--	--
Cluster-1007.145358	741	--	--	--	--	--	--	--	--	--	--	--	--	--	--	--	--	--	--
Cluster-1007.121084	2533	--	--	--	--	K13295	aprataxin and PNK-like factor	A0JNH9	Aprataxin and PNK-like factor OS=Bos taurus OX=9913 GN=APLF PE=2 SV=1	PF05529//PF10186//PF00644//PF02912//PF04977	B-cell receptor-associated protein 31-like//Vacuolar sorting 38 and autophagy-related subunit 14//Poly(ADP-ribose) polymerase catalytic domain//Aminoacyl tRNA synthetase class II, N-terminal domain//Septum formation initiator	GO:0006432//GO:0007049//GO:0006886//GO:0006571//GO:0009094//GO:0000162//GO:0010508	phenylalanyl-tRNA aminoacylation//cell cycle//intracellular protein transport//tyrosine biosynthetic process//L-phenylalanine biosynthetic process//tryptophan biosynthetic process//positive regulation of autophagy	GO:0005524//GO:0003950//GO:0000166//GO:0004826	ATP binding//NAD+ ADP-ribosyltransferase activity//nucleotide binding//phenylalanine-tRNA ligase activity	GO:0016021//GO:0009328//GO:0005783//GO:0005737	integral component of membrane//phenylalanine-tRNA ligase complex//endoplasmic reticulum//cytoplasm	--	--
Cluster-36959.0	1543	--	--	--	--	--	--	--	--	PF09520	Type II restriction endonuclease, TdeIII	GO:0009307//GO:0006308	DNA restriction-modification system//DNA catabolic process	GO:0003677//GO:0009036	DNA binding//Type II site-specific deoxyribonuclease activity	GO:0009359	Type II site-specific deoxyribonuclease complex	--	--
Cluster-1007.145359	445	--	--	--	--	--	--	--	--	--	--	--	--	--	--	--	--	--	--
Cluster-1007.46412	268	--	--	--	--	--	--	--	--	--	--	--	--	--	--	--	--	--	--
Cluster-1007.46413	731	--	--	LC027342.1	Haliotis diversicolor genomic DNA, BAC clone: 006_rep_c2414	--	--	--	--	--	--	--	--	--	--	--	--	--	--
Cluster-1007.46410	730	--	--	--	--	--	--	--	--	--	--	--	--	--	--	--	--	--	--
Cluster-1007.46411	1040	--	--	LC027314.1	Haliotis diversicolor genomic DNA, BAC clone: 002_c14	--	--	--	--	--	--	--	--	--	--	--	--	--	--
Cluster-1007.25198	2248	--	--	--	--	--	--	P0CG31	Putative zinc finger protein 286B OS=Homo sapiens OX=9606 GN=ZNF286B PE=5 SV=1	PF00096//PF13912	Zinc finger, C2H2 type//C2H2-type zinc finger	--	--	GO:0046872	metal ion binding	--	--	KOG1721	FOG: Zn-finger
Cluster-1007.25199	389	--	--	--	--	--	--	--	--	--	--	--	--	--	--	--	--	--	--
Cluster-1007.46414	4141	--	--	--	--	--	--	Q2PZL6	Protocadherin Fat 4 OS=Mus musculus OX=10090 GN=Fat4 PE=1 SV=2	PF00028	Cadherin domain	GO:0007156	homophilic cell adhesion via plasma membrane adhesion molecules	GO:0005509	calcium ion binding	GO:0016020	membrane	--	--
Cluster-1007.46415	2505	--	--	LC027339.1	Haliotis diversicolor genomic DNA, BAC clone: 006_rep_c2411	--	--	--	--	PF02944	BESS motif	--	--	GO:0003677	DNA binding	--	--	--	--
Cluster-1007.25194	2143	--	--	--	--	--	--	Q3T0G5	Pyridoxal phosphate homeostasis protein OS=Bos taurus OX=9913 GN=PLPBP PE=2 SV=1	PF02784	Pyridoxal-dependent decarboxylase, pyridoxal binding domain	--	--	GO:0003824	catalytic activity	--	--	KOG3157	Proline synthetase co-transcribed protein
Cluster-1007.25195	784	--	--	--	--	--	--	--	--	--	--	--	--	--	--	--	--	--	--
Cluster-1007.25196	502	--	--	--	--	--	--	--	--	--	--	--	--	--	--	--	--	--	--
Cluster-1007.25197	3124	--	--	--	--	--	--	Q96IR2	Zinc finger protein 845 OS=Homo sapiens OX=9606 GN=ZNF845 PE=1 SV=3	PF15750//PF00096//PF13912	Ubiquitin-binding zinc-finger//Zinc finger, C2H2 type//C2H2-type zinc finger	--	--	GO:0043130//GO:0046872	ubiquitin binding//metal ion binding	--	--	--	--
Cluster-1007.25190	474	--	--	--	--	--	--	--	--	--	--	--	--	--	--	--	--	--	--
Cluster-1007.25191	484	--	--	LC027358.1	Haliotis diversicolor genomic DNA, BAC clone: 009_rep_c2377	--	--	--	--	--	--	--	--	--	--	--	--	--	--
Cluster-1007.25192	700	--	--	XM_008383547.2	PREDICTED: Malus x domestica ubiquitin carboxyl-terminal hydrolase 2-like (LOC103444593), mRNA	K05610	ubiquitin carboxyl-terminal hydrolase L5	O04482	Ubiquitin carboxyl-terminal hydrolase 2 OS=Arabidopsis thaliana OX=3702 GN=UCH2 PE=1 SV=1	PF01088	Ubiquitin carboxyl-terminal hydrolase, family 1	GO:0006511//GO:0016579//GO:0006508	ubiquitin-dependent protein catabolic process//protein deubiquitination//proteolysis	GO:0004843	ubiquitin-specific protease activity	GO:0005622	intracellular	KOG2778	Ubiquitin C-terminal hydrolase
Cluster-1007.25193	230	--	--	--	--	--	--	--	--	--	--	--	--	--	--	--	--	--	--
Cluster-16825.0	569	--	--	--	--	--	--	--	--	PF03104	DNA polymerase family B, exonuclease domain	--	--	GO:0008408	3'-5' exonuclease activity	--	--	--	--
Cluster-1007.145350	455	--	--	--	--	--	--	--	--	--	--	--	--	--	--	--	--	--	--
Cluster-40920.0	1557	--	--	--	--	--	--	--	--	--	--	--	--	--	--	--	--	--	--
Cluster-31553.0	989	--	--	--	--	K15326	tRNA-splicing endonuclease subunit Sen54	Q8C2A2	tRNA-splicing endonuclease subunit Sen54 OS=Mus musculus OX=10090 GN=Tsen54 PE=2 SV=2	PF02778	tRNA intron endonuclease, N-terminal domain	GO:0051252//GO:0006388	regulation of RNA metabolic process//tRNA splicing, via endonucleolytic cleavage and ligation	GO:0000213	tRNA-intron endonuclease activity	GO:0000214	tRNA-intron endonuclease complex	--	--
Cluster-1007.145351	324	--	--	--	--	--	--	--	--	--	--	--	--	--	--	--	--	--	--
Cluster-30908.0	3187	--	--	--	--	--	--	--	--	--	--	--	--	--	--	--	--	--	--
Cluster-1007.130529	1701	--	--	--	--	--	--	--	--	--	--	--	--	--	--	--	--	--	--
Cluster-1007.130528	873	--	--	GU995898.1	Haliotis discus hannai microsatellite CHh141 sequence	--	--	--	--	--	--	--	--	--	--	--	--	--	--
Cluster-1007.130527	657	--	--	LC027340.1	Haliotis diversicolor genomic DNA, BAC clone: 006_rep_c2412	--	--	--	--	--	--	--	--	--	--	--	--	--	--
Cluster-1007.130526	269	--	--	LC027294.1	Haliotis diversicolor genomic DNA, BAC clone: 001_rep_c977	--	--	--	--	--	--	--	--	--	--	--	--	--	--
Cluster-1007.130525	217	--	--	--	--	--	--	--	--	--	--	--	--	--	--	--	--	--	--
Cluster-1007.130524	3467	--	--	--	--	K17478	FK506-binding protein 15	Q5T1M5	FK506-binding protein 15 OS=Homo sapiens OX=9606 GN=FKBP15 PE=1 SV=2	PF00038//PF17078//PF08702//PF00254	Intermediate filament protein//SWI5-dependent HO expression protein 3//Fibrinogen alpha/beta chain family//FKBP-type peptidyl-prolyl cis-trans isomerase	GO:0006457//GO:0030168//GO:0007165//GO:0051258//GO:0051028//GO:0048309	protein folding//platelet activation//signal transduction//protein polymerization//mRNA transport//endoplasmic reticulum inheritance	GO:0005198//GO:0030674//GO:0005102	structural molecule activity//protein binding, bridging//receptor binding	GO:0005577//GO:0005882	fibrinogen complex//intermediate filament	KOG0549	FKBP-type peptidyl-prolyl cis-trans isomerase
Cluster-1007.130523	309	--	--	--	--	--	--	--	--	--	--	--	--	--	--	--	--	--	--
Cluster-1007.130522	255	--	--	--	--	--	--	--	--	--	--	--	--	--	--	--	--	--	--
Cluster-1007.130521	512	--	--	--	--	--	--	--	--	--	--	--	--	--	--	--	--	--	--
Cluster-1007.130520	434	--	--	JQ906782.1	Haliotis diversicolor hypothetical protein gene, complete cds	--	--	--	--	--	--	--	--	--	--	--	--	--	--
Cluster-34665.0	640	--	--	--	--	--	--	--	--	--	--	--	--	--	--	--	--	--	--
Cluster-24687.0	1988	--	--	--	--	--	--	--	--	PF01424	R3H domain	--	--	GO:0003676	nucleic acid binding	--	--	--	--
Cluster-36478.0	1063	--	--	--	--	--	--	--	--	PF05461	Apolipoprotein L	GO:0042157//GO:0006869	lipoprotein metabolic process//lipid transport	GO:0008289	lipid binding	GO:0005576	extracellular region	--	--
Cluster-1007.27252	2720	--	--	--	--	--	--	--	--	--	--	--	--	--	--	--	--	--	--
Cluster-1007.121088	315	--	--	LC027326.1	Haliotis diversicolor genomic DNA, BAC clone: 003_rep_c698	--	--	--	--	--	--	--	--	--	--	--	--	--	--
Cluster-17439.0	986	--	--	--	--	--	--	--	--	--	--	--	--	--	--	--	--	--	--
Cluster-1007.120355	1164	--	--	--	--	--	--	--	--	--	--	--	--	--	--	--	--	--	--
Cluster-1007.120354	683	--	--	--	--	--	--	--	--	--	--	--	--	--	--	--	--	--	--
Cluster-1007.120357	235	--	--	--	--	--	--	--	--	--	--	--	--	--	--	--	--	--	--
Cluster-1007.120356	289	--	--	--	--	--	--	P86725	Uncharacterized protein 6 OS=Haliotis asinina OX=109174 PE=1 SV=1	--	--	--	--	--	--	--	--	--	--
Cluster-1007.120351	546	--	--	--	--	--	--	--	--	--	--	--	--	--	--	--	--	--	--
Cluster-1007.120350	3303	--	--	EF367115.1	Haliotis midae microsatellite HmNS14R sequence	--	--	--	--	--	--	--	--	--	--	--	--	--	--
Cluster-1007.120353	1577	--	--	--	--	--	--	--	--	PF01708//PF08651//PF08702//PF06009//PF17095//PF05531//PF11744//PF10717//PF05478//PF07926//PF02601	Geminivirus putative movement protein//DASH complex subunit Duo1//Fibrinogen alpha/beta chain family//Laminin Domain II//Spectrin-binding region of Ca2+-Calmodulin//Nucleopolyhedrovirus P10 protein//Aluminium activated malate transporter//Occlusion-derived virus envelope protein ODV-E18//Prominin//TPR/MLP1/MLP2-like protein//Exonuclease VII, large subunit	GO:0006308//GO:0051258//GO:0031175//GO:0007155//GO:0006606//GO:0046740//GO:0030168//GO:0007067//GO:0007165//GO:0015743	DNA catabolic process//protein polymerization//neuron projection development//cell adhesion//protein import into nucleus//transport of virus in host, cell to cell//platelet activation//mitotic nuclear division//signal transduction//malate transport	GO:0030674//GO:0005516//GO:0008855//GO:0030507//GO:0005102	protein binding, bridging//calmodulin binding//exodeoxyribonuclease VII activity//spectrin binding//receptor binding	GO:0019031//GO:0008091//GO:0009318//GO:0072686//GO:0042729//GO:0019028//GO:0005577//GO:0016021	viral envelope//spectrin//exodeoxyribonuclease VII complex//mitotic spindle//DASH complex//viral capsid//fibrinogen complex//integral component of membrane	--	--
Cluster-1007.120352	3859	--	--	LC027314.1	Haliotis diversicolor genomic DNA, BAC clone: 002_c14	--	--	--	--	PF05007	Mannosyltransferase (PIG-M)	GO:0006506	GPI anchor biosynthetic process	GO:0016758	transferase activity, transferring hexosyl groups	GO:0016021	integral component of membrane	--	--
Cluster-1007.121089	1205	--	--	LC027326.1	Haliotis diversicolor genomic DNA, BAC clone: 003_rep_c698	--	--	--	--	--	--	--	--	--	--	--	--	--	--
Cluster-1007.120359	1128	--	--	--	--	--	--	Q9DD78	Toll-like receptor 2 type-1 OS=Gallus gallus OX=9031 GN=TLR2-1 PE=2 SV=1	PF13676//PF01582	TIR domain//TIR domain	GO:0007165	signal transduction	GO:0005515	protein binding	--	--	--	--
Cluster-1007.120358	538	--	--	LC027339.1	Haliotis diversicolor genomic DNA, BAC clone: 006_rep_c2411	--	--	--	--	--	--	--	--	--	--	--	--	--	--
Cluster-1007.82580	2927	--	--	--	--	K02187	caspase 3	Q8MJC3	Caspase-3 OS=Oryctolagus cuniculus OX=9986 GN=CASP3 PE=2 SV=1	PF00656//PF09726//PF00204	Caspase domain//Transmembrane protein//DNA gyrase B	GO:0006265//GO:0006508	DNA topological change//proteolysis	GO:0005524//GO:0003677//GO:0003918//GO:0004197	ATP binding//DNA binding//DNA topoisomerase type II (ATP-hydrolyzing) activity//cysteine-type endopeptidase activity	GO:0016021	integral component of membrane	--	--
Cluster-43178.3	594	--	--	--	--	--	--	--	--	--	--	--	--	--	--	--	--	--	--
Cluster-1007.125659	757	--	--	KT336367.1	Haliotis discus discus signal transducer and activator of transcription 5 (STAT5) gene, complete cds	--	--	--	--	--	--	--	--	--	--	--	--	--	--
Cluster-1007.125658	3196	--	--	FJ607746.1	Haliotis diversicolor microsatellite HUHD64 sequence	K07912	Ras-related protein Rab-24	Q969Q5	Ras-related protein Rab-24 OS=Homo sapiens OX=9606 GN=RAB24 PE=1 SV=1	PF01926//PF05326//PF00071//PF08477//PF10662//PF04670//PF00025//PF03193	50S ribosome-binding GTPase//Seminal vesicle autoantigen (SVA)//Ras family//Ras of Complex, Roc, domain of DAPkinase//Ethanolamine utilisation - propanediol utilisation//Gtr1/RagA G protein conserved region//ADP-ribosylation factor family//Protein of unknown function, DUF258	GO:0007264//GO:0006576	small GTPase mediated signal transduction//cellular biogenic amine metabolic process	GO:0005524//GO:0005525//GO:0003924	ATP binding//GTP binding//GTPase activity	GO:0005576	extracellular region	KOG0092	GTPase Rab5/YPT51 and related small G protein superfamily GTPases
Cluster-1007.125657	2647	--	--	--	--	K07912	Ras-related protein Rab-24	Q969Q5	Ras-related protein Rab-24 OS=Homo sapiens OX=9606 GN=RAB24 PE=1 SV=1	PF00071//PF05326//PF01926//PF04670//PF00025//PF03193//PF10662//PF08477	Ras family//Seminal vesicle autoantigen (SVA)//50S ribosome-binding GTPase//Gtr1/RagA G protein conserved region//ADP-ribosylation factor family//Protein of unknown function, DUF258//Ethanolamine utilisation - propanediol utilisation//Ras of Complex, Roc, domain of DAPkinase	GO:0007264//GO:0006576	small GTPase mediated signal transduction//cellular biogenic amine metabolic process	GO:0005524//GO:0005525//GO:0003924	ATP binding//GTP binding//GTPase activity	GO:0005576	extracellular region	KOG0092	GTPase Rab5/YPT51 and related small G protein superfamily GTPases
Cluster-1007.125656	2152	--	--	--	--	--	--	--	--	PF00071	Ras family	GO:0007264	small GTPase mediated signal transduction	GO:0005525	GTP binding	--	--	--	--
Cluster-22055.0	659	--	--	--	--	--	--	--	--	--	--	--	--	--	--	--	--	--	--
Cluster-1007.125654	831	--	--	--	--	--	--	--	--	--	--	--	--	--	--	--	--	--	--
Cluster-1007.125653	354	--	--	FJ607746.1	Haliotis diversicolor microsatellite HUHD64 sequence	--	--	--	--	--	--	--	--	--	--	--	--	--	--
Cluster-1007.125652	2565	--	--	--	--	K07912	Ras-related protein Rab-24	Q969Q5	Ras-related protein Rab-24 OS=Homo sapiens OX=9606 GN=RAB24 PE=1 SV=1	PF00071//PF03193//PF04670//PF00025//PF10662//PF08477//PF01926	Ras family//Protein of unknown function, DUF258//Gtr1/RagA G protein conserved region//ADP-ribosylation factor family//Ethanolamine utilisation - propanediol utilisation//Ras of Complex, Roc, domain of DAPkinase//50S ribosome-binding GTPase	GO:0007264//GO:0006576	small GTPase mediated signal transduction//cellular biogenic amine metabolic process	GO:0005524//GO:0005525//GO:0003924	ATP binding//GTP binding//GTPase activity	--	--	KOG0092	GTPase Rab5/YPT51 and related small G protein superfamily GTPases
Cluster-1007.125651	495	--	--	--	--	--	--	--	--	--	--	--	--	--	--	--	--	--	--
Cluster-1007.125650	315	--	--	--	--	--	--	--	--	--	--	--	--	--	--	--	--	--	--
Cluster-20430.0	670	--	--	--	--	--	--	--	--	--	--	--	--	--	--	--	--	--	--
Cluster-4375.0	812	--	--	--	--	--	--	--	--	--	--	--	--	--	--	--	--	--	--
Cluster-32073.0	1957	--	--	XM_022434444.1	PREDICTED: Crassostrea virginica ADP-ribosylation factor GTPase-activating protein 2-like (LOC111101822), transcript variant X4, mRNA	K12493	ADP-ribosylation factor GTPase-activating protein 2/3	Q99K28	ADP-ribosylation factor GTPase-activating protein 2 OS=Mus musculus OX=10090 GN=Arfgap2 PE=1 SV=1	PF02271//PF03122//PF01412	Ubiquinol-cytochrome C reductase complex 14kD subunit//Herpes virus major capsid protein//Putative GTPase activating protein for Arf	GO:0006122	mitochondrial electron transport, ubiquinol to cytochrome c	GO:0005096//GO:0005198	GTPase activator activity//structural molecule activity	GO:0019028//GO:0005750	viral capsid//mitochondrial respiratory chain complex III	KOG0706	Predicted GTPase-activating protein
Cluster-19543.0	448	--	--	--	--	--	--	--	--	PF12297	Ellis van Creveld protein 2 like protein	GO:0007224	smoothened signaling pathway	--	--	--	--	--	--
Cluster-19543.1	348	--	--	--	--	--	--	--	--	PF04277	Oxaloacetate decarboxylase, gamma chain	GO:0071436//GO:0006814//GO:0006560//GO:0006525//GO:0006090	sodium ion export//sodium ion transport//proline metabolic process//arginine metabolic process//pyruvate metabolic process	GO:0008948//GO:0015081	oxaloacetate decarboxylase activity//sodium ion transmembrane transporter activity	GO:0016020	membrane	--	--
Cluster-1007.82588	3456	--	--	--	--	K09228	KRAB domain-containing zinc finger protein	Q6ZMW2	Zinc finger protein 782 OS=Homo sapiens OX=9606 GN=ZNF782 PE=2 SV=1	PF00096//PF13465//PF16622	Zinc finger, C2H2 type//Zinc-finger double domain//zinc-finger C2H2-type	--	--	GO:0046872	metal ion binding	--	--	--	--
Cluster-28770.0	1401	--	--	--	--	--	--	Q5ND28	Scavenger receptor class F member 1 OS=Mus musculus OX=10090 GN=Scarf1 PE=1 SV=1	PF05038//PF08177	Cytochrome Cytochrome b558 alpha-subunit//Small acid-soluble spore protein N family	GO:0030436	asexual sporulation	GO:0020037	heme binding	GO:0042601	endospore-forming forespore	--	--
Cluster-40398.0	539	--	--	LC027340.1	Haliotis diversicolor genomic DNA, BAC clone: 006_rep_c2412	--	--	--	--	--	--	--	--	--	--	--	--	--	--
Cluster-7935.0	659	--	--	XM_008355371.2	PREDICTED: Malus x domestica eukaryotic translation initiation factor 1A (LOC103417179), mRNA	K03236	translation initiation factor 1A	P56331	Eukaryotic translation initiation factor 1A OS=Onobrychis viciifolia OX=3882 PE=2 SV=2	PF01176	Translation initiation factor 1A / IF-1	GO:0006446//GO:0006413	regulation of translational initiation//translational initiation	GO:0003743//GO:0003723	translation initiation factor activity//RNA binding	GO:0005840	ribosome	KOG3403	Translation initiation factor 1A (eIF-1A)
Cluster-1007.128580	2099	--	--	--	--	--	--	--	--	--	--	--	--	--	--	--	--	--	--
Cluster-1007.128581	276	--	--	--	--	--	--	--	--	--	--	--	--	--	--	--	--	--	--
Cluster-1007.128582	461	--	--	XM_020608292.1	PREDICTED: Monopterus albus solute carrier family 25 member 3 (slc25a3), transcript variant X2, mRNA	--	--	--	--	--	--	--	--	--	--	--	--	KOG0767	Mitochondrial phosphate carrier protein
Cluster-1007.128583	1614	--	--	--	--	--	--	--	--	PF04548	AIG1 family	--	--	GO:0005525	GTP binding	--	--	--	--
Cluster-1007.128584	477	--	--	--	--	--	--	--	--	--	--	--	--	--	--	--	--	--	--
Cluster-1007.128585	1522	--	--	--	--	--	--	Q9JHX4	Caspase-8 OS=Rattus norvegicus OX=10116 GN=Casp8 PE=1 SV=1	PF01335//PF00089	Death effector domain//Trypsin	GO:0042981//GO:0006508	regulation of apoptotic process//proteolysis	GO:0004252//GO:0005515	serine-type endopeptidase activity//protein binding	--	--	--	--
Cluster-1007.128586	1306	--	--	--	--	--	--	--	--	PF01335//PF05157//PF00089	Death effector domain//Type II secretion system (T2SS), protein E, N-terminal domain//Trypsin	GO:0006508//GO:0042981//GO:0006810	proteolysis//regulation of apoptotic process//transport	GO:0005515//GO:0005524//GO:0004252	protein binding//ATP binding//serine-type endopeptidase activity	--	--	--	--
Cluster-1007.128587	1889	--	--	--	--	--	--	O75095	Multiple epidermal growth factor-like domains protein 6 OS=Homo sapiens OX=9606 GN=MEGF6 PE=1 SV=4	PF01309	Equine arteritis virus small envelope glycoprotein	--	--	--	--	GO:0019031	viral envelope	KOG1218	Proteins containing Ca2+-binding EGF-like domains
Cluster-1007.128588	1755	--	--	--	--	--	--	A0JM12	Multiple epidermal growth factor-like domains protein 10 OS=Xenopus tropicalis OX=8364 GN=megf10 PE=2 SV=1	--	--	--	--	--	--	--	--	KOG1218	Proteins containing Ca2+-binding EGF-like domains
Cluster-1007.128589	975	--	--	--	--	--	--	Q14162	Scavenger receptor class F member 1 OS=Homo sapiens OX=9606 GN=SCARF1 PE=1 SV=3	--	--	--	--	--	--	--	--	KOG1218	Proteins containing Ca2+-binding EGF-like domains
Cluster-17229.1	1592	--	--	--	--	--	--	A1Z9R4	Zinc finger protein 423 homolog OS=Drosophila melanogaster OX=7227 GN=Oaz PE=2 SV=2	PF06112//PF00412//PF13465//PF00096	Gammaherpesvirus capsid protein//LIM domain//Zinc-finger double domain//Zinc finger, C2H2 type	--	--	GO:0046872//GO:0008270	metal ion binding//zinc ion binding	GO:0019028	viral capsid	KOG1721	FOG: Zn-finger
Cluster-7896.0	658	--	--	--	--	--	--	--	--	--	--	--	--	--	--	--	--	--	--
Cluster-1007.109192	355	--	--	LC027295.1	Haliotis diversicolor genomic DNA, BAC clone: 001_rep_c978	--	--	--	--	--	--	--	--	--	--	--	--	--	--
Cluster-1007.109193	8643	--	--	--	--	K13297	receptor-type tyrosine-protein phosphatase T	Q99M80	Receptor-type tyrosine-protein phosphatase T OS=Mus musculus OX=10090 GN=Ptprt PE=1 SV=2	PF00102//PF00782//PF16656//PF00041	Protein-tyrosine phosphatase//Dual specificity phosphatase, catalytic domain//Purple acid Phosphatase, N-terminal domain//Fibronectin type III domain	GO:0019497//GO:0006570//GO:0006470//GO:0006771	hexachlorocyclohexane metabolic process//tyrosine metabolic process//protein dephosphorylation//riboflavin metabolic process	GO:0005515//GO:0008138//GO:0003993//GO:0004725//GO:0046872	protein binding//protein tyrosine/serine/threonine phosphatase activity//acid phosphatase activity//protein tyrosine phosphatase activity//metal ion binding	--	--	--	--
Cluster-1007.109190	1677	--	--	--	--	--	--	--	--	PF09416	RNA helicase (UPF2 interacting domain)	GO:0000184	nuclear-transcribed mRNA catabolic process, nonsense-mediated decay	GO:0004386//GO:0003677//GO:0008270//GO:0005524	helicase activity//DNA binding//zinc ion binding//ATP binding	GO:0005737	cytoplasm	--	--
Cluster-1007.109191	540	--	--	--	--	--	--	--	--	--	--	--	--	--	--	--	--	--	--
Cluster-1007.109196	214	--	--	--	--	--	--	--	--	--	--	--	--	--	--	--	--	--	--
Cluster-1007.109197	1250	--	--	--	--	--	--	--	--	--	--	--	--	--	--	--	--	--	--
Cluster-1007.109194	552	--	--	LM125724.1	Taenia asiatica genome assembly T_asiatica_South_Korea ,scaffold TASK_scaffold0000447	--	--	--	--	PF01221	Dynein light chain type 1	GO:0007017	microtubule-based process	--	--	GO:0005875	microtubule associated complex	--	--
Cluster-1007.109195	1206	--	--	--	--	--	--	--	--	--	--	--	--	--	--	--	--	--	--
Cluster-1007.109198	1085	--	--	--	--	K04576	calcitonin receptor	P32214	Calcitonin receptor OS=Rattus norvegicus OX=10116 GN=Calcr PE=2 SV=1	PF02793	Hormone receptor domain	GO:0007186	G-protein coupled receptor signaling pathway	GO:0004930	G-protein coupled receptor activity	GO:0016020	membrane	--	--
Cluster-1007.109199	654	--	--	LC027341.1	Haliotis diversicolor genomic DNA, BAC clone: 006_rep_c2413	--	--	--	--	PF02976	DNA mismatch repair enzyme MutH	--	--	GO:0003677//GO:0004519	DNA binding//endonuclease activity	--	--	--	--
Cluster-1007.4802	1250	--	--	--	--	--	--	--	--	--	--	--	--	--	--	--	--	--	--
Cluster-1007.4803	201	--	--	--	--	--	--	--	--	PF00253	Ribosomal protein S14p/S29e	GO:0006412//GO:0042254	translation//ribosome biogenesis	GO:0003735	structural constituent of ribosome	GO:0005840//GO:0005622	ribosome//intracellular	--	--
Cluster-1007.4800	480	--	--	KF881014.1	Haliotis diversicolor 14-3-3 zeta mRNA, complete cds	--	--	--	--	--	--	--	--	--	--	--	--	--	--
Cluster-1007.4801	820	--	--	--	--	--	--	--	--	PF07647	SAM domain (Sterile alpha motif)	--	--	GO:0005515	protein binding	--	--	--	--
Cluster-1007.4806	2089	--	--	--	--	--	--	--	--	--	--	--	--	--	--	--	--	--	--
Cluster-1007.4807	3018	--	--	--	--	--	--	--	--	--	--	--	--	--	--	--	--	--	--
Cluster-1007.4804	545	--	--	HQ650425.1	Haliotis diversicolor clone Hdi34 microsatellite sequence	--	--	--	--	PF02535	ZIP Zinc transporter	GO:0030001//GO:0055085	metal ion transport//transmembrane transport	GO:0046873	metal ion transmembrane transporter activity	GO:0016020	membrane	--	--
Cluster-1007.4805	226	--	--	--	--	--	--	--	--	--	--	--	--	--	--	--	--	--	--
Cluster-1007.4808	1603	--	--	--	--	K09228	KRAB domain-containing zinc finger protein	Q5TYW1	Zinc finger protein 658 OS=Homo sapiens OX=9606 GN=ZNF658 PE=1 SV=2	PF13465//PF00158//PF16622//PF13912//PF00096//PF00320	Zinc-finger double domain//Sigma-54 interaction domain//zinc-finger C2H2-type//C2H2-type zinc finger//Zinc finger, C2H2 type//GATA zinc finger	GO:0006355	regulation of transcription, DNA-templated	GO:0008134//GO:0046872//GO:0005524//GO:0008270//GO:0003700//GO:0043565	transcription factor binding//metal ion binding//ATP binding//zinc ion binding//transcription factor activity, sequence-specific DNA binding//sequence-specific DNA binding	GO:0005667	transcription factor complex	--	--
Cluster-1007.4809	1491	--	--	--	--	K09228	KRAB domain-containing zinc finger protein	Q5TYW1	Zinc finger protein 658 OS=Homo sapiens OX=9606 GN=ZNF658 PE=1 SV=2	PF00158//PF01363//PF16622//PF13465//PF00096//PF13912//PF00320	Sigma-54 interaction domain//FYVE zinc finger//zinc-finger C2H2-type//Zinc-finger double domain//Zinc finger, C2H2 type//C2H2-type zinc finger//GATA zinc finger	GO:0006355	regulation of transcription, DNA-templated	GO:0003700//GO:0008270//GO:0005524//GO:0008134//GO:0046872//GO:0043565	transcription factor activity, sequence-specific DNA binding//zinc ion binding//ATP binding//transcription factor binding//metal ion binding//sequence-specific DNA binding	GO:0005667	transcription factor complex	--	--
Cluster-12564.0	580	--	--	--	--	--	--	--	--	--	--	--	--	--	--	--	--	--	--
Cluster-23025.0	723	--	--	--	--	--	--	--	--	--	--	--	--	--	--	--	--	--	--
Cluster-6095.0	1012	--	--	AB545981.1	Pyrus pyrifolia genes for F-box proteins, S ribonuclease, complete cds, haplotype: S4	--	--	--	--	--	--	--	--	--	--	--	--	--	--
Cluster-1007.23901	1475	--	--	KT336367.1	Haliotis discus discus signal transducer and activator of transcription 5 (STAT5) gene, complete cds	--	--	--	--	PF00693	Thymidine kinase from herpesvirus	GO:0006206//GO:0006230	pyrimidine nucleobase metabolic process//TMP biosynthetic process	GO:0005524//GO:0004797	ATP binding//thymidine kinase activity	--	--	--	--
Cluster-1007.23900	403	--	--	--	--	--	--	--	--	--	--	--	--	--	--	--	--	--	--
Cluster-1007.23903	253	--	--	--	--	--	--	--	--	--	--	--	--	--	--	--	--	--	--
Cluster-1007.23902	1459	--	--	KT336367.1	Haliotis discus discus signal transducer and activator of transcription 5 (STAT5) gene, complete cds	--	--	--	--	PF00693	Thymidine kinase from herpesvirus	GO:0006230//GO:0006206	TMP biosynthetic process//pyrimidine nucleobase metabolic process	GO:0005524//GO:0004797	ATP binding//thymidine kinase activity	--	--	--	--
Cluster-1007.23905	1715	--	--	KU351386.1	Haliotis discus discus galectin-4 gene, complete cds	--	--	--	--	--	--	--	--	--	--	--	--	--	--
Cluster-1007.23904	790	--	--	--	--	--	--	Q9XWD6	Cell death abnormality protein 1 OS=Caenorhabditis elegans OX=6239 GN=ced-1 PE=1 SV=1	PF10717	Occlusion-derived virus envelope protein ODV-E18	--	--	--	--	GO:0019031	viral envelope	--	--
Cluster-1007.23907	490	--	--	--	--	--	--	--	--	PF01623	Carlavirus putative nucleic acid binding protein	GO:0006355	regulation of transcription, DNA-templated	GO:0003676	nucleic acid binding	--	--	--	--
Cluster-1007.23906	5573	--	--	--	--	--	--	Q92626	Peroxidasin homolog OS=Homo sapiens OX=9606 GN=PXDN PE=1 SV=2	PF00093	von Willebrand factor type C domain	--	--	GO:0005515	protein binding	--	--	--	--
Cluster-1007.23909	376	--	--	--	--	--	--	--	--	--	--	--	--	--	--	--	--	--	--
Cluster-1007.23908	405	--	--	--	--	--	--	--	--	--	--	--	--	--	--	--	--	--	--
Cluster-17453.0	468	--	--	--	--	--	--	--	--	--	--	--	--	--	--	--	--	--	--
Cluster-28333.0	739	--	--	--	--	--	--	--	--	--	--	--	--	--	--	--	--	--	--
Cluster-1007.70470	4429	--	--	XM_020064872.1	PREDICTED: Crassostrea gigas guanine nucleotide-binding protein subunit beta (LOC105322341), transcript variant X3, mRNA	K04536	guanine nucleotide-binding protein G(I)/G(S)/G(T) subunit beta-1	Q5GIS3	Guanine nucleotide-binding protein subunit beta OS=Pinctada fucata OX=50426 PE=1 SV=1	PF17001//PF04565//PF13085//PF00400	Type III secretion basal body protein I, YscI, HrpB, PscI//RNA polymerase Rpb2, domain 3//2Fe-2S iron-sulfur cluster binding domain//WD domain, G-beta repeat	GO:0006206//GO:0006351//GO:0009306//GO:0006144//GO:0006118	pyrimidine nucleobase metabolic process//transcription, DNA-templated//protein secretion//purine nucleobase metabolic process//obsolete electron transport	GO:0051536//GO:0003899//GO:0009055//GO:0003677//GO:0005515	iron-sulfur cluster binding//DNA-directed RNA polymerase activity//electron carrier activity//DNA binding//protein binding	GO:0005730	nucleolus	KOG0286	G-protein beta subunit
Cluster-33070.0	1536	--	--	--	--	--	--	--	--	PF02165	Wilm's tumour protein	GO:0006355	regulation of transcription, DNA-templated	--	--	GO:0005634	nucleus	--	--
Cluster-1007.108241	523	--	--	--	--	--	--	O88450	Deformed epidermal autoregulatory factor 1 homolog OS=Rattus norvegicus OX=10116 GN=Deaf1 PE=1 SV=1	PF01342	SAND domain	--	--	GO:0003677	DNA binding	--	--	--	--
Cluster-1007.108240	230	--	--	--	--	--	--	--	--	--	--	--	--	--	--	--	--	--	--
Cluster-1007.108243	296	--	--	--	--	--	--	--	--	--	--	--	--	--	--	--	--	--	--
Cluster-1007.108242	935	--	--	--	--	--	--	--	--	--	--	--	--	--	--	--	--	--	--
Cluster-1007.108245	1659	--	--	--	--	--	--	--	--	--	--	--	--	--	--	--	--	--	--
Cluster-1007.108244	1077	--	--	--	--	K09935	uncharacterized protein	Q5UR67	N-glycosidase R617 OS=Acanthamoeba polyphaga mimivirus OX=212035 GN=MIMI_R617 PE=3 SV=1	PF16588//PF02229	C2H2 zinc-finger//Transcriptional Coactivator p15 (PC4)	GO:0006355	regulation of transcription, DNA-templated	GO:0003676//GO:0003677//GO:0008270//GO:0003713	nucleic acid binding//DNA binding//zinc ion binding//transcription coactivator activity	GO:0005667	transcription factor complex	--	--
Cluster-1007.108247	364	--	--	LC027336.1	Haliotis diversicolor genomic DNA, BAC clone: 005_rep_c27301	--	--	--	--	--	--	--	--	--	--	--	--	--	--
Cluster-1007.108246	262	--	--	--	--	--	--	--	--	PF01422	NF-X1 type zinc finger	GO:0006355	regulation of transcription, DNA-templated	GO:0008270//GO:0003700	zinc ion binding//transcription factor activity, sequence-specific DNA binding	GO:0005634//GO:0005667	nucleus//transcription factor complex	--	--
Cluster-1007.108249	951	--	--	--	--	--	--	--	--	--	--	--	--	--	--	--	--	--	--
Cluster-1007.108248	815	--	--	--	--	--	--	--	--	--	--	--	--	--	--	--	--	--	--
Cluster-39555.0	1508	--	--	--	--	--	--	--	--	PF02536//PF02293	mTERF//AmiS/UreI family transporter	GO:0006355//GO:0006810	regulation of transcription, DNA-templated//transport	GO:0003690	double-stranded DNA binding	GO:0016020//GO:0005739	membrane//mitochondrion	--	--
Cluster-25764.0	1238	--	--	--	--	--	--	--	--	--	--	--	--	--	--	--	--	--	--
Cluster-1007.100814	683	--	--	--	--	--	--	--	--	--	--	--	--	--	--	--	--	--	--
Cluster-1007.100815	650	--	--	--	--	--	--	--	--	--	--	--	--	--	--	--	--	--	--
Cluster-1007.100816	3199	--	--	--	--	--	--	--	--	--	--	--	--	--	--	--	--	--	--
Cluster-5818.0	1107	--	--	--	--	--	--	D4AUF4	WSC domain-containing protein ARB_07870 OS=Arthroderma benhamiae (strain ATCC MYA-4681 / CBS 112371) OX=663331 GN=ARB_07870 PE=1 SV=1	--	--	--	--	--	--	--	--	--	--
Cluster-1007.100810	893	--	--	LC027312.1	Haliotis diversicolor genomic DNA, BAC clone: 002_c12	--	--	--	--	--	--	--	--	--	--	--	--	--	--
Cluster-1007.100811	1011	--	--	LC027340.1	Haliotis diversicolor genomic DNA, BAC clone: 006_rep_c2412	--	--	--	--	--	--	--	--	--	--	--	--	--	--
Cluster-1007.100812	982	--	--	LC027340.1	Haliotis diversicolor genomic DNA, BAC clone: 006_rep_c2412	--	--	--	--	--	--	--	--	--	--	--	--	--	--
Cluster-1007.58979	704	--	--	--	--	--	--	--	--	--	--	--	--	--	--	--	--	--	--
Cluster-1007.58976	2249	--	--	--	--	--	--	--	--	--	--	--	--	--	--	--	--	--	--
Cluster-1007.58977	542	--	--	--	--	--	--	--	--	--	--	--	--	--	--	--	--	--	--
Cluster-1007.58974	641	--	--	--	--	K06530	CD109 antigen	P06238	Alpha-2-macroglobulin OS=Rattus norvegicus OX=10116 GN=A2m PE=2 SV=2	PF07677	A-macroglobulin receptor	--	--	--	--	GO:0005576	extracellular region	KOG1366	Alpha-macroglobulin
Cluster-1007.58975	1264	--	--	--	--	--	--	--	--	PF10598	RNA recognition motif of the spliceosomal PrP8	--	--	GO:0003723	RNA binding	--	--	--	--
Cluster-1007.58972	289	--	--	LC027330.1	Haliotis diversicolor genomic DNA, BAC clone: 003_rep_c702	--	--	--	--	--	--	--	--	--	--	--	--	--	--
Cluster-1007.58973	977	--	--	--	--	--	--	--	--	PF07677	A-macroglobulin receptor	--	--	--	--	GO:0005576	extracellular region	--	--
Cluster-1007.58970	870	--	--	--	--	--	--	--	--	--	--	--	--	--	--	--	--	--	--
Cluster-1007.58971	1476	--	--	--	--	--	--	--	--	--	--	--	--	--	--	--	--	--	--
Cluster-1007.27109	211	--	--	--	--	--	--	--	--	--	--	--	--	--	--	--	--	--	--
Cluster-1007.27108	985	--	--	--	--	--	--	--	--	--	--	--	--	--	--	--	--	--	--
Cluster-1007.27105	494	--	--	--	--	--	--	--	--	--	--	--	--	--	--	--	--	--	--
Cluster-1007.27104	733	--	--	DQ785770.1	Haliotis midae clone HmR39T microsatellite sequence	--	--	--	--	--	--	--	--	--	--	--	--	--	--
Cluster-1007.27107	1116	--	--	--	--	--	--	--	--	--	--	--	--	--	--	--	--	--	--
Cluster-1007.27106	1026	--	--	LC027341.1	Haliotis diversicolor genomic DNA, BAC clone: 006_rep_c2413	--	--	--	--	PF03973	Triabin	GO:0030682	evasion or tolerance of host defense response	--	--	--	--	--	--
Cluster-1007.27101	495	--	--	--	--	--	--	--	--	--	--	--	--	--	--	--	--	--	--
Cluster-1007.27100	3004	--	--	--	--	--	--	Q8BP56	Protein-glucosylgalactosylhydroxylysine glucosidase OS=Mus musculus OX=10090 GN=Pgghg PE=1 SV=1	PF03632//PF03160	Glycosyl hydrolase family 65 central catalytic domain//Calx-beta domain	GO:0005975//GO:0007154	carbohydrate metabolic process//cell communication	GO:0003824	catalytic activity	GO:0016021	integral component of membrane	KOG4125	Acid trehalase
Cluster-1007.27103	652	--	--	DQ785770.1	Haliotis midae clone HmR39T microsatellite sequence	--	--	--	--	--	--	--	--	--	--	--	--	--	--
Cluster-1007.27102	1780	--	--	XM_009053811.1	Lottia gigantea hypothetical protein partial mRNA	--	--	Q0VC03	Molybdate-anion transporter OS=Bos taurus OX=9913 GN=MFSD5 PE=2 SV=1	PF07690//PF05631	Major Facilitator Superfamily//Sugar-tranasporters, 12 TM	GO:0015689//GO:0055085	molybdate ion transport//transmembrane transport	GO:0015098	molybdate ion transmembrane transporter activity	GO:0016021	integral component of membrane	KOG4332	Predicted sugar transporter
Cluster-29728.0	2290	--	--	--	--	--	--	P51471	Blue-sensitive opsin OS=Anolis carolinensis OX=28377 PE=1 SV=1	PF03503//PF00001	Chlamydia cysteine-rich outer membrane protein 3//7 transmembrane receptor (rhodopsin family)	GO:0007186	G-protein coupled receptor signaling pathway	GO:0004930//GO:0005201	G-protein coupled receptor activity//extracellular matrix structural constituent	GO:0016021//GO:0005578	integral component of membrane//proteinaceous extracellular matrix	--	--
Cluster-3131.2	663	--	--	--	--	--	--	--	--	--	--	--	--	--	--	--	--	--	--
Cluster-3131.1	2538	--	--	--	--	--	--	O94779	Contactin-5 OS=Homo sapiens OX=9606 GN=CNTN5 PE=1 SV=2	PF07354//PF02480//PF13895//PF11770	Zona-pellucida-binding protein (Sp38)//Alphaherpesvirus glycoprotein E//Immunoglobulin domain//GRB2-binding adapter (GAPT)	GO:0007339	binding of sperm to zona pellucida	GO:0005515	protein binding	GO:0016021//GO:0016020//GO:0005576	integral component of membrane//membrane//extracellular region	--	--
Cluster-3131.0	914	--	--	--	--	--	--	--	--	--	--	--	--	--	--	--	--	--	--
Cluster-28250.0	340	--	--	--	--	--	--	--	--	--	--	--	--	--	--	--	--	--	--
Cluster-19665.0	411	--	--	--	--	--	--	--	--	--	--	--	--	--	--	--	--	--	--
Cluster-1007.119922	2551	--	--	LC027302.1	Haliotis diversicolor genomic DNA, BAC clone: 002_c2	--	--	Q05196	Polyadenylate-binding protein 5 OS=Arabidopsis thaliana OX=3702 GN=PAB5 PE=1 SV=3	PF00619//PF00658	Caspase recruitment domain//Poly-adenylate binding protein, unique domain	GO:0042981	regulation of apoptotic process	GO:0003723	RNA binding	--	--	KOG0123	Polyadenylate-binding protein (RRM superfamily)
Cluster-1007.119923	461	--	--	--	--	--	--	--	--	--	--	--	--	--	--	--	--	--	--
Cluster-1007.119920	2876	--	--	--	--	--	--	--	--	PF01342	SAND domain	--	--	GO:0003677	DNA binding	--	--	--	--
Cluster-1007.119921	2411	--	--	--	--	--	--	--	--	PF01342	SAND domain	--	--	GO:0003677	DNA binding	--	--	--	--
Cluster-1007.119926	1611	--	--	--	--	--	--	--	--	--	--	--	--	--	--	--	--	--	--
Cluster-1007.119927	2633	--	--	--	--	--	--	--	--	--	--	--	--	--	--	--	--	--	--
Cluster-1007.119924	479	--	--	LC027358.1	Haliotis diversicolor genomic DNA, BAC clone: 009_rep_c2377	--	--	--	--	--	--	--	--	--	--	--	--	--	--
Cluster-1007.119925	1565	--	--	--	--	--	--	--	--	--	--	--	--	--	--	--	--	--	--
Cluster-38881.2	744	--	--	--	--	--	--	--	--	--	--	--	--	--	--	--	--	--	--
Cluster-1007.119928	1673	--	--	--	--	--	--	A2VE52	Oligoribonuclease, mitochondrial OS=Bos taurus OX=9913 GN=REXO2 PE=2 SV=1	PF06817	Reverse transcriptase thumb domain	GO:0006278	RNA-dependent DNA replication	GO:0003964	RNA-directed DNA polymerase activity	--	--	KOG3242	Oligoribonuclease (3'->5' exoribonuclease)
Cluster-1007.119929	1991	--	--	--	--	--	--	--	--	--	--	--	--	--	--	--	--	--	--
Cluster-38881.1	1620	--	--	--	--	K12035	tripartite motif-containing protein 71	D2GXS7	Tripartite motif-containing protein 2 OS=Ailuropoda melanoleuca OX=9646 GN=TRIM2 PE=3 SV=1	PF01436//PF10584	NHL repeat//Proteasome subunit A N-terminal signature	GO:0006511	ubiquitin-dependent protein catabolic process	GO:0004175//GO:0005515	endopeptidase activity//protein binding	GO:0019773	proteasome core complex, alpha-subunit complex	KOG2177	Predicted E3 ubiquitin ligase
Cluster-1007.60463	676	--	--	--	--	--	--	--	--	--	--	--	--	--	--	--	--	--	--
Cluster-14985.0	1553	--	--	--	--	--	--	--	--	--	--	--	--	--	--	--	--	--	--
Cluster-1007.60461	505	--	--	--	--	--	--	--	--	PF09194	Restriction endonuclease BsobI	GO:0006308//GO:0009307	DNA catabolic process//DNA restriction-modification system	GO:0009036//GO:0003677	Type II site-specific deoxyribonuclease activity//DNA binding	GO:0009359	Type II site-specific deoxyribonuclease complex	--	--
Cluster-1007.60460	2952	--	--	--	--	--	--	--	--	--	--	--	--	--	--	--	--	--	--
Cluster-1007.60467	3313	--	--	LC027342.1	Haliotis diversicolor genomic DNA, BAC clone: 006_rep_c2414	K15447	tRNASer (uridine44-2'-O)-methyltransferase	Q4KLT3	Probable tRNA (uracil-O(2)-)-methyltransferase OS=Xenopus laevis OX=8355 GN=trmt44 PE=2 SV=1	PF05175//PF07757	Methyltransferase small domain//Predicted AdoMet-dependent methyltransferase	--	--	GO:0008168	methyltransferase activity	--	--	KOG3790	Uncharacterized conserved protein
Cluster-1007.60466	2316	--	--	LC027332.1	Haliotis diversicolor genomic DNA, BAC clone: 004_rep_c861	--	--	--	--	PF13895//PF08925	Immunoglobulin domain//Domain of Unknown Function (DUF1907)	--	--	GO:0005515	protein binding	GO:0005634	nucleus	--	--
Cluster-1007.60465	960	--	--	--	--	--	--	--	--	--	--	--	--	--	--	--	--	--	--
Cluster-1007.60464	1629	--	--	--	--	--	--	--	--	--	--	--	--	--	--	--	--	--	--
Cluster-1007.93384	570	--	--	--	--	--	--	--	--	PF14867//PF15200	Lantibiotic alpha//Keratinocyte differentiation-associated	GO:0050830	defense response to Gram-positive bacterium	--	--	GO:0005576	extracellular region	--	--
Cluster-1007.93385	1045	--	--	--	--	--	--	--	--	--	--	--	--	--	--	--	--	--	--
Cluster-1007.93386	681	--	--	--	--	--	--	--	--	--	--	--	--	--	--	--	--	--	--
Cluster-1007.93387	287	--	--	--	--	--	--	--	--	--	--	--	--	--	--	--	--	--	--
Cluster-1007.93380	1557	--	--	LC027339.1	Haliotis diversicolor genomic DNA, BAC clone: 006_rep_c2411	--	--	--	--	PF08063	PADR1 (NUC008) domain	--	--	GO:0003950	NAD+ ADP-ribosyltransferase activity	GO:0005634	nucleus	--	--
Cluster-1007.93381	471	--	--	--	--	K08848	receptor-interacting serine/threonine-protein kinase 4	Q9Z148	Histone-lysine N-methyltransferase EHMT2 OS=Mus musculus OX=10090 GN=Ehmt2 PE=1 SV=2	PF00023//PF13606	Ankyrin repeat//Ankyrin repeat	--	--	GO:0005515	protein binding	--	--	--	--
Cluster-1007.93382	2569	--	--	--	--	--	--	Q8BQB6	Stabilizer of axonemal microtubules 2 OS=Mus musculus OX=10090 GN=Saxo2 PE=2 SV=2	--	--	--	--	--	--	--	--	--	--
Cluster-1007.93383	351	--	--	--	--	--	--	Q658L1	Stabilizer of axonemal microtubules 2 OS=Homo sapiens OX=9606 GN=SAXO2 PE=2 SV=1	--	--	--	--	--	--	--	--	--	--
Cluster-1007.142632	2200	--	--	--	--	--	--	--	--	--	--	--	--	--	--	--	--	--	--
Cluster-1007.142633	5034	--	--	--	--	--	--	Q9U1M8	Myosin-I heavy chain OS=Dictyostelium discoideum OX=44689 GN=myoI PE=1 SV=1	PF03166//PF00612//PF00005//PF00063//PF02099//PF05496	MH2 domain//IQ calmodulin-binding motif//ABC transporter//Myosin head (motor domain)//Josephin//Holliday junction DNA helicase ruvB N-terminus	GO:0006355//GO:0006281//GO:0006310	regulation of transcription, DNA-templated//DNA repair//DNA recombination	GO:0008242//GO:0016887//GO:0009378//GO:0005524//GO:0003774//GO:0005515	omega peptidase activity//ATPase activity//four-way junction helicase activity//ATP binding//motor activity//protein binding	GO:0016459//GO:0005657//GO:0009379//GO:0005622	myosin complex//replication fork//Holliday junction helicase complex//intracellular	--	--
Cluster-1007.142630	494	--	--	--	--	--	--	--	--	--	--	--	--	--	--	--	--	--	--
Cluster-1007.142631	1740	--	--	--	--	--	--	--	--	PF00001//PF02487//PF06783//PF04977//PF02950	7 transmembrane receptor (rhodopsin family)//CLN3 protein//Uncharacterised protein family (UPF0239)//Septum formation initiator//Conotoxin	GO:0009405//GO:0007186//GO:0006810//GO:0007049	pathogenesis//G-protein coupled receptor signaling pathway//transport//cell cycle	GO:0008200//GO:0004930	ion channel inhibitor activity//G-protein coupled receptor activity	GO:0005576//GO:0016020//GO:0016021	extracellular region//membrane//integral component of membrane	--	--
Cluster-1007.142636	292	--	--	LC027342.1	Haliotis diversicolor genomic DNA, BAC clone: 006_rep_c2414	--	--	--	--	--	--	--	--	--	--	--	--	--	--
Cluster-1007.142637	598	--	--	--	--	K05302	N-lysine methyltransferase SETD6	Q9CWY3	N-lysine methyltransferase SETD6 OS=Mus musculus OX=10090 GN=Setd6 PE=1 SV=1	--	--	--	--	--	--	--	--	--	--
Cluster-1007.24454	1474	--	--	--	--	--	--	--	--	PF01637//PF00910//PF03796//PF04851//PF03266//PF05496//PF00004//PF08477//PF01695//PF07728//PF12105	Archaeal ATPase//RNA helicase//DnaB-like helicase C terminal domain//Type III restriction enzyme, res subunit//NTPase//Holliday junction DNA helicase ruvB N-terminus//ATPase family associated with various cellular activities (AAA)//Ras of Complex, Roc, domain of DAPkinase//IstB-like ATP binding protein//AAA domain (dynein-related subfamily)//SpoU, rRNA methylase, C-terminal	GO:0006281//GO:0009451//GO:0006310//GO:0008033//GO:0006260//GO:0007264	DNA repair//RNA modification//DNA recombination//tRNA processing//DNA replication//small GTPase mediated signal transduction	GO:0003724//GO:0003678//GO:0016887//GO:0003723//GO:0098519//GO:0016787//GO:0005524//GO:0005525//GO:0009378//GO:0009020//GO:0003677	RNA helicase activity//DNA helicase activity//ATPase activity//RNA binding//nucleotide phosphatase activity, acting on free nucleotides//hydrolase activity//ATP binding//GTP binding//four-way junction helicase activity//tRNA (guanosine-2'-O-)-methyltransferase activity//DNA binding	GO:0005657//GO:0009379	replication fork//Holliday junction helicase complex	--	--
Cluster-1007.142635	1953	--	--	--	--	K05613	solute carrier family 1 (glial high affinity glutamate transporter), member 2	P43006	Excitatory amino acid transporter 2 OS=Mus musculus OX=10090 GN=Slc1a2 PE=1 SV=1	PF00375	Sodium:dicarboxylate symporter family	GO:0006820//GO:0006835//GO:0006812	anion transport//dicarboxylic acid transport//cation transport	GO:0017153	sodium:dicarboxylate symporter activity	GO:0016020	membrane	KOG3787	Glutamate/aspartate and neutral amino acid transporters
Cluster-1007.24458	1050	--	--	HQ650243.1	Haliotis diversicolor clone Hdi436 microsatellite sequence	--	--	--	--	--	--	--	--	--	--	--	--	--	--
Cluster-1007.142639	537	--	--	--	--	--	--	--	--	--	--	--	--	--	--	--	--	--	--
Cluster-1007.21992	506	--	--	--	--	--	--	--	--	--	--	--	--	--	--	--	--	--	--
Cluster-23750.0	1806	--	--	NM_001085130.2	Arabidopsis thaliana Cobalamin-independent synthase family protein (ATMS1), mRNA	--	--	O50008	5-methyltetrahydropteroyltriglutamate--homocysteine methyltransferase 1 OS=Arabidopsis thaliana OX=3702 GN=MS1 PE=1 SV=1	PF01717//PF08267	Cobalamin-independent synthase, Catalytic domain//Cobalamin-independent synthase, N-terminal domain	GO:0009086//GO:0008652	methionine biosynthetic process//cellular amino acid biosynthetic process	GO:0003871//GO:0008270	5-methyltetrahydropteroyltriglutamate-homocysteine S-methyltransferase activity//zinc ion binding	--	--	KOG2263	Methionine synthase II (cobalamin-independent)
Cluster-1007.120347	602	--	--	--	--	--	--	--	--	--	--	--	--	--	--	--	--	--	--
Cluster-1007.72265	4689	--	--	XM_022444338.1	PREDICTED: Crassostrea virginica protein transport protein Sec61 subunit alpha (LOC111108442), mRNA	K10956	protein transport protein SEC61 subunit alpha	Q2KHX4	Protein transport protein Sec61 subunit alpha isoform 2 OS=Bos taurus OX=9913 GN=SEC61A2 PE=2 SV=3	PF00168//PF00344	C2 domain//SecY translocase	GO:0015031	protein transport	GO:0005515	protein binding	GO:0016020	membrane	KOG1373	Transport protein Sec61, alpha subunit
Cluster-1007.1323	1293	--	--	LC027302.1	Haliotis diversicolor genomic DNA, BAC clone: 002_c2	--	--	--	--	PF02884	Polysaccharide lyase family 8, C-terminal beta-sandwich domain	--	--	GO:0016829	lyase activity	GO:0005576	extracellular region	--	--
Cluster-1007.39256	811	--	--	--	--	--	--	--	--	--	--	--	--	--	--	--	--	--	--
Cluster-1007.39257	482	--	--	LC027336.1	Haliotis diversicolor genomic DNA, BAC clone: 005_rep_c27301	--	--	--	--	--	--	--	--	--	--	--	--	--	--
Cluster-1007.39254	1825	--	--	MG613735.1	Pectocera sp. INB159 cyclin-dependent kinase 7 (Cdk7) gene, partial cds	K02202	cyclin-dependent kinase 7	P20911	Cyclin-dependent kinase 7 OS=Xenopus laevis OX=8355 GN=cdk7 PE=1 SV=1	PF05000//PF07714//PF00069	RNA polymerase Rpb1, domain 4//Protein tyrosine kinase//Protein kinase domain	GO:0006206//GO:0006351//GO:0006144//GO:0006468	pyrimidine nucleobase metabolic process//transcription, DNA-templated//purine nucleobase metabolic process//protein phosphorylation	GO:0005524//GO:0004672//GO:0003899//GO:0003677	ATP binding//protein kinase activity//DNA-directed RNA polymerase activity//DNA binding	GO:0005730	nucleolus	KOG0659	Cdk activating kinase (CAK)/RNA polymerase II transcription initiation/nucleotide excision repair factor TFIIH/TFIIK, kinase subunit CDK7
Cluster-1007.39255	978	--	--	LC027297.1	Haliotis diversicolor genomic DNA, BAC clone: 001_rep_c980	--	--	--	--	--	--	--	--	--	--	--	--	--	--
Cluster-1007.39252	633	--	--	--	--	--	--	--	--	--	--	--	--	--	--	--	--	--	--
Cluster-1007.39253	1793	--	--	XM_023729569.1	PREDICTED: Trichechus manatus latirostris cyclin dependent kinase 7 (LOC101346727), transcript variant X2, mRNA	K02202	cyclin-dependent kinase 7	P20911	Cyclin-dependent kinase 7 OS=Xenopus laevis OX=8355 GN=cdk7 PE=1 SV=1	PF07714//PF00069//PF05000	Protein tyrosine kinase//Protein kinase domain//RNA polymerase Rpb1, domain 4	GO:0006206//GO:0006351//GO:0006468//GO:0006144	pyrimidine nucleobase metabolic process//transcription, DNA-templated//protein phosphorylation//purine nucleobase metabolic process	GO:0005524//GO:0003677//GO:0004672//GO:0003899	ATP binding//DNA binding//protein kinase activity//DNA-directed RNA polymerase activity	GO:0005730	nucleolus	KOG0659	Cdk activating kinase (CAK)/RNA polymerase II transcription initiation/nucleotide excision repair factor TFIIH/TFIIK, kinase subunit CDK7
Cluster-1007.39250	5262	--	--	XM_009056734.1	Lottia gigantea hypothetical protein partial mRNA	--	--	O94880	PHD finger protein 14 OS=Homo sapiens OX=9606 GN=PHF14 PE=1 SV=2	PF01166//PF00727//PF05887//PF00628	TSC-22/dip/bun family//Interleukin 4//Procyclic acidic repetitive protein (PARP)//PHD-finger	GO:0006355//GO:0040007//GO:0006955//GO:0007165//GO:0008283	regulation of transcription, DNA-templated//growth//immune response//signal transduction//cell proliferation	GO:0003700//GO:0005136//GO:0008083//GO:0005515	transcription factor activity, sequence-specific DNA binding//interleukin-4 receptor binding//growth factor activity//protein binding	GO:0005667//GO:0016020//GO:0016516//GO:0005576	transcription factor complex//membrane//interleukin-4 receptor complex//extracellular region	KOG0957	PHD finger protein
Cluster-1007.39251	971	--	--	--	--	--	--	Q04336	Uncharacterized protein YMR196W OS=Saccharomyces cerevisiae (strain ATCC 204508 / S288c) OX=559292 GN=YMR196W PE=1 SV=1	--	--	--	--	--	--	--	--	--	--
Cluster-8346.0	839	--	--	XM_009356977.2	PREDICTED: Pyrus x bretschneideri serine/threonine-protein kinase SRK2A-like (LOC103946318), mRNA	K07198	5'-AMP-activated protein kinase, catalytic alpha subunit	P43291	Serine/threonine-protein kinase SRK2A OS=Arabidopsis thaliana OX=3702 GN=SRK2A PE=1 SV=1	PF11705//PF00069//PF08015//PF07714	DNA-directed RNA polymerase III subunit Rpc31//Protein kinase domain//Fungal mating-type pheromone//Protein tyrosine kinase	GO:0006359//GO:0006468//GO:0007165	regulation of transcription from RNA polymerase III promoter//protein phosphorylation//signal transduction	GO:0005524//GO:0000772//GO:0004672	ATP binding//mating pheromone activity//protein kinase activity	GO:0016020	membrane	--	--
Cluster-1007.39258	660	--	--	LC027344.1	Haliotis diversicolor genomic DNA, BAC clone: 006_rep_c2416	--	--	--	--	PF00593	TonB dependent receptor	GO:0007165//GO:0006810	signal transduction//transport	GO:0004872	receptor activity	GO:0016020	membrane	--	--
Cluster-1007.39259	2318	--	--	--	--	--	--	--	--	--	--	--	--	--	--	--	--	--	--
Cluster-1242.0	721	--	--	--	--	--	--	--	--	--	--	--	--	--	--	--	--	--	--
Cluster-17062.0	422	--	--	--	--	--	--	--	--	--	--	--	--	--	--	--	--	--	--
Cluster-17062.1	433	--	--	--	--	--	--	--	--	--	--	--	--	--	--	--	--	--	--
Cluster-17062.2	507	--	--	--	--	--	--	--	--	--	--	--	--	--	--	--	--	--	--
Cluster-1007.10617	248	--	--	--	--	--	--	--	--	--	--	--	--	--	--	--	--	--	--
Cluster-1007.24247	1932	--	--	--	--	--	--	--	--	--	--	--	--	--	--	--	--	--	--
Cluster-1007.10615	262	--	--	--	--	--	--	--	--	--	--	--	--	--	--	--	--	--	--
Cluster-1007.10614	741	--	--	--	--	--	--	--	--	--	--	--	--	--	--	--	--	--	--
Cluster-1007.10613	2142	--	--	GU995900.1	Haliotis discus hannai microsatellite CHh146 sequence	--	--	--	--	PF01641	SelR domain	GO:0055114	oxidation-reduction process	GO:0033743	peptide-methionine (R)-S-oxide reductase activity	--	--	--	--
Cluster-1007.10612	524	--	--	EU244339.1	Haliotis diversicolor clone HDr4CJ78 hypothetical protein mRNA, complete cds	--	--	--	--	--	--	--	--	--	--	--	--	--	--
Cluster-1007.10611	572	--	--	--	--	--	--	--	--	--	--	--	--	--	--	--	--	--	--
Cluster-1007.24246	1511	--	--	--	--	--	--	--	--	--	--	--	--	--	--	--	--	--	--
Cluster-44131.0	950	--	--	--	--	--	--	--	--	--	--	--	--	--	--	--	--	--	--
Cluster-1007.51021	417	--	--	HQ650379.1	Haliotis diversicolor clone Hdi159 microsatellite sequence	--	--	--	--	--	--	--	--	--	--	--	--	--	--
Cluster-1007.139269	3058	--	--	--	--	--	--	--	--	PF03604//PF07992//PF00070	DNA directed RNA polymerase, 7 kDa subunit//Pyridine nucleotide-disulphide oxidoreductase//Pyridine nucleotide-disulphide oxidoreductase	GO:0006351//GO:0006206//GO:0055114//GO:0006144	transcription, DNA-templated//pyrimidine nucleobase metabolic process//oxidation-reduction process//purine nucleobase metabolic process	GO:0016491//GO:0003899//GO:0003677	oxidoreductase activity//DNA-directed RNA polymerase activity//DNA binding	GO:0005730	nucleolus	--	--
Cluster-1007.10618	2206	--	--	KP982895.1	Haliotis discus discus C1q domain containing protein 1 gene, complete cds	--	--	--	--	PF04513	Baculovirus polyhedron envelope protein, PEP, C terminus	--	--	GO:0005198	structural molecule activity	GO:0019028//GO:0019031	viral capsid//viral envelope	--	--
Cluster-19213.0	432	--	--	--	--	--	--	--	--	--	--	--	--	--	--	--	--	--	--
Cluster-1007.71332	282	--	--	--	--	--	--	--	--	--	--	--	--	--	--	--	--	--	--
Cluster-23633.2	758	--	--	--	--	--	--	--	--	PF08052	PyrBI operon leader peptide	GO:0019856	pyrimidine nucleobase biosynthetic process	--	--	--	--	--	--
Cluster-17444.0	536	--	--	AY013578.1	Haliotis kamtschatkana clone Hka48 microsatellite sequence	--	--	--	--	--	--	--	--	--	--	--	--	--	--
Cluster-11858.0	655	--	--	--	--	--	--	--	--	--	--	--	--	--	--	--	--	--	--
Cluster-34841.0	3736	--	--	LC027339.1	Haliotis diversicolor genomic DNA, BAC clone: 006_rep_c2411	--	--	--	--	--	--	--	--	--	--	--	--	--	--
Cluster-1007.71334	1122	--	--	--	--	--	--	--	--	--	--	--	--	--	--	--	--	--	--
Cluster-23633.0	1417	--	--	--	--	--	--	--	--	PF08052	PyrBI operon leader peptide	GO:0019856	pyrimidine nucleobase biosynthetic process	--	--	--	--	--	--
Cluster-1007.51025	1690	--	--	--	--	K17409	small subunit ribosomal protein S30	P82924	28S ribosomal protein S30, mitochondrial OS=Bos taurus OX=9913 GN=MRPS30 PE=1 SV=4	PF07147	Mitochondrial 28S ribosomal protein S30 (PDCD9)	GO:0042254//GO:0006412	ribosome biogenesis//translation	GO:0003735	structural constituent of ribosome	GO:0005840//GO:0005739	ribosome//mitochondrion	KOG4461	Mitochondrial 28S ribosomal protein S30
Cluster-1007.71336	312	--	--	--	--	--	--	--	--	--	--	--	--	--	--	--	--	--	--
Cluster-1007.17344	339	--	--	--	--	--	--	--	--	--	--	--	--	--	--	--	--	--	--
Cluster-1007.17345	455	--	--	--	--	--	--	--	--	PF02188//PF08210	GoLoco motif//APOBEC-like N-terminal domain	GO:0006807	nitrogen compound metabolic process	GO:0016814//GO:0008270//GO:0030695	hydrolase activity, acting on carbon-nitrogen (but not peptide) bonds, in cyclic amidines//zinc ion binding//GTPase regulator activity	--	--	--	--
Cluster-1007.17346	2460	--	--	--	--	--	--	--	--	--	--	--	--	--	--	--	--	--	--
Cluster-1007.17347	596	--	--	--	--	--	--	--	--	PF08675	RNA binding domain	GO:0051252//GO:0006402	regulation of RNA metabolic process//mRNA catabolic process	GO:0046872//GO:0004535//GO:0003723	metal ion binding//poly(A)-specific ribonuclease activity//RNA binding	GO:0005737//GO:0005634	cytoplasm//nucleus	--	--
Cluster-1007.17340	322	--	--	--	--	--	--	--	--	--	--	--	--	--	--	--	--	--	--
Cluster-1007.17341	933	--	--	LC027332.1	Haliotis diversicolor genomic DNA, BAC clone: 004_rep_c861	--	--	--	--	--	--	--	--	--	--	--	--	--	--
Cluster-1007.17342	1439	--	--	--	--	--	--	--	--	--	--	--	--	--	--	--	--	--	--
Cluster-1007.17343	1393	--	--	--	--	--	--	--	--	PF00383//PF08210	Cytidine and deoxycytidylate deaminase zinc-binding region//APOBEC-like N-terminal domain	GO:0006807	nitrogen compound metabolic process	GO:0016814//GO:0008270	hydrolase activity, acting on carbon-nitrogen (but not peptide) bonds, in cyclic amidines//zinc ion binding	--	--	--	--
Cluster-1007.68683	1205	--	--	--	--	K16060	baculoviral IAP repeat-containing protein 2/3	A1E2V0	Baculoviral IAP repeat-containing protein 3 OS=Canis lupus familiaris OX=9615 GN=BIRC3 PE=2 SV=1	PF07967	C3HC zinc finger-like	--	--	GO:0008270	zinc ion binding	GO:0005634	nucleus	--	--
Cluster-43825.0	700	--	--	--	--	--	--	--	--	--	--	--	--	--	--	--	--	--	--
Cluster-1007.11650	972	--	--	--	--	--	--	--	--	--	--	--	--	--	--	--	--	--	--
Cluster-1007.17348	1559	--	--	LC027342.1	Haliotis diversicolor genomic DNA, BAC clone: 006_rep_c2414	--	--	--	--	PF03408	Foamy virus envelope protein	--	--	--	--	GO:0019031	viral envelope	--	--
Cluster-1007.17349	297	--	--	KP734099.1	Haliotis madaka thioredoxin peroxidase 1 mRNA, complete cds	--	--	--	--	--	--	--	--	--	--	--	--	--	--
Cluster-25167.0	742	--	--	--	--	--	--	--	--	--	--	--	--	--	--	--	--	--	--
Cluster-1007.68681	251	--	--	KP698946.1	Haliotis discus hannai ribosomal protein L7A (RPL7A) mRNA, partial cds	K02936	large subunit ribosomal protein L7Ae	P46223	60S ribosomal protein L7a OS=Drosophila melanogaster OX=7227 GN=RpL7A PE=1 SV=2	--	--	--	--	--	--	--	--	KOG3166	60S ribosomal protein L7A
Cluster-29726.0	601	--	--	--	--	--	--	--	--	--	--	--	--	--	--	--	--	--	--
Cluster-29726.1	462	--	--	--	--	--	--	--	--	--	--	--	--	--	--	--	--	--	--
Cluster-34465.0	2602	--	--	--	--	--	--	--	--	PF00619	Caspase recruitment domain	GO:0042981	regulation of apoptotic process	--	--	--	--	--	--
Cluster-46313.0	1133	--	--	--	--	--	--	--	--	--	--	--	--	--	--	--	--	--	--
Cluster-1007.68680	2822	--	--	--	--	--	--	--	--	--	--	--	--	--	--	--	--	--	--
Cluster-1007.92479	4619	--	--	XM_017724151.1	PREDICTED: Pygocentrus nattereri cAMP-specific 3',5'-cyclic phosphodiesterase 4B-like (LOC108443455), transcript variant X2, mRNA	K13293	cAMP-specific phosphodiesterase 4	Q07343	cAMP-specific 3',5'-cyclic phosphodiesterase 4B OS=Homo sapiens OX=9606 GN=PDE4B PE=1 SV=1	PF00233//PF01487	3'5'-cyclic nucleotide phosphodiesterase//Type I 3-dehydroquinase	GO:0000162//GO:0006571//GO:0009094//GO:0006144//GO:0007165	tryptophan biosynthetic process//tyrosine biosynthetic process//L-phenylalanine biosynthetic process//purine nucleobase metabolic process//signal transduction	GO:0004114//GO:0003855	3',5'-cyclic-nucleotide phosphodiesterase activity//3-dehydroquinate dehydratase activity	--	--	KOG3689	Cyclic nucleotide phosphodiesterase
Cluster-1007.92478	8325	--	--	XM_008335440.2	PREDICTED: Cynoglossus semilaevis cAMP-specific 3',5'-cyclic phosphodiesterase 4D-like (LOC103397220), mRNA	K13293	cAMP-specific phosphodiesterase 4	Q9W4S9	cAMP-specific 3',5'-cyclic phosphodiesterase, isoforms N/G OS=Drosophila melanogaster OX=7227 GN=dnc PE=3 SV=2	PF00233//PF06495//PF01487	3'5'-cyclic nucleotide phosphodiesterase//Fruit fly transformer protein//Type I 3-dehydroquinase	GO:0046660//GO:0006571//GO:0009094//GO:0006144//GO:0007165//GO:0000162//GO:0006397	female sex differentiation//tyrosine biosynthetic process//L-phenylalanine biosynthetic process//purine nucleobase metabolic process//signal transduction//tryptophan biosynthetic process//mRNA processing	GO:0003855//GO:0004114	3-dehydroquinate dehydratase activity//3',5'-cyclic-nucleotide phosphodiesterase activity	GO:0005634	nucleus	KOG3689	Cyclic nucleotide phosphodiesterase
Cluster-1007.108446	379	--	--	--	--	--	--	--	--	--	--	--	--	--	--	--	--	--	--
Cluster-1007.92475	617	--	--	--	--	--	--	--	--	--	--	--	--	--	--	--	--	--	--
Cluster-1007.92474	3828	--	--	XM_007245554.2	PREDICTED: Astyanax mexicanus chloride voltage-gated channel 7 (clcn7), mRNA	K05016	chloride channel 7	O70496	H(+)/Cl(-) exchange transporter 7 OS=Mus musculus OX=10090 GN=Clcn7 PE=1 SV=1	PF00654//PF10660	Voltage gated chloride channel//Iron-containing outer mitochondrial membrane protein N-terminus	GO:0055085//GO:0006821	transmembrane transport//chloride transport	GO:0051537//GO:0005247	2 iron, 2 sulfur cluster binding//voltage-gated chloride channel activity	GO:0016020//GO:0043231	membrane//intracellular membrane-bounded organelle	KOG0474	Cl- channel CLC-7 and related proteins (CLC superfamily)
Cluster-1007.92477	3871	--	--	XM_007245554.2	PREDICTED: Astyanax mexicanus chloride voltage-gated channel 7 (clcn7), mRNA	K05016	chloride channel 7	O70496	H(+)/Cl(-) exchange transporter 7 OS=Mus musculus OX=10090 GN=Clcn7 PE=1 SV=1	PF10660//PF00654	Iron-containing outer mitochondrial membrane protein N-terminus//Voltage gated chloride channel	GO:0055085//GO:0006821	transmembrane transport//chloride transport	GO:0051537//GO:0005247	2 iron, 2 sulfur cluster binding//voltage-gated chloride channel activity	GO:0016020//GO:0043231	membrane//intracellular membrane-bounded organelle	KOG0474	Cl- channel CLC-7 and related proteins (CLC superfamily)
Cluster-1007.24248	1283	--	--	LC027342.1	Haliotis diversicolor genomic DNA, BAC clone: 006_rep_c2414	K12343	3-oxo-5-alpha-steroid 4-dehydrogenase 1	A5PJS2	3-oxo-5-alpha-steroid 4-dehydrogenase 1 OS=Bos taurus OX=9913 GN=SRD5A1 PE=2 SV=1	PF02544	3-oxo-5-alpha-steroid 4-dehydrogenase	GO:0006629	lipid metabolic process	GO:0016627	oxidoreductase activity, acting on the CH-CH group of donors	GO:0005737//GO:0016021	cytoplasm//integral component of membrane	KOG1638	Steroid reductase
Cluster-1007.92471	233	--	--	--	--	--	--	--	--	PF00649//PF01155	Copper fist DNA binding domain//Hydrogenase/urease nickel incorporation, metallochaperone, hypA	GO:0006464//GO:0006355	cellular protein modification process//regulation of transcription, DNA-templated	GO:0016151//GO:0003677//GO:0005507//GO:0003700	nickel cation binding//DNA binding//copper ion binding//transcription factor activity, sequence-specific DNA binding	GO:0005634//GO:0005667	nucleus//transcription factor complex	--	--
Cluster-1007.92470	737	--	--	--	--	--	--	--	--	--	--	--	--	--	--	--	--	--	--
Cluster-1007.92473	3804	--	--	XM_007245554.2	PREDICTED: Astyanax mexicanus chloride voltage-gated channel 7 (clcn7), mRNA	K05016	chloride channel 7	O70496	H(+)/Cl(-) exchange transporter 7 OS=Mus musculus OX=10090 GN=Clcn7 PE=1 SV=1	PF10660//PF00654	Iron-containing outer mitochondrial membrane protein N-terminus//Voltage gated chloride channel	GO:0055085//GO:0006821	transmembrane transport//chloride transport	GO:0051537//GO:0005247	2 iron, 2 sulfur cluster binding//voltage-gated chloride channel activity	GO:0016020//GO:0043231	membrane//intracellular membrane-bounded organelle	KOG0474	Cl- channel CLC-7 and related proteins (CLC superfamily)
Cluster-1007.92472	3206	--	--	XM_022190818.1	PREDICTED: Acanthochromis polyacanthus talin 2 (tln2), transcript variant X6, mRNA	K06271	talin	P54939	Talin-1 OS=Gallus gallus OX=9031 GN=TLN1 PE=1 SV=2	PF01608//PF02255//PF04825	I/LWEQ domain//PTS system, Lactose/Cellobiose specific IIA subunit//N terminus of Rad21 / Rec8 like protein	GO:0009401	phosphoenolpyruvate-dependent sugar phosphotransferase system	GO:0003779//GO:0005515	actin binding//protein binding	--	--	KOG0980	Actin-binding protein SLA2/Huntingtin-interacting protein Hip1
Cluster-1007.108444	308	--	--	--	--	--	--	--	--	--	--	--	--	--	--	--	--	--	--
Cluster-43115.0	274	--	--	--	--	--	--	--	--	--	--	--	--	--	--	--	--	--	--
Cluster-1007.68689	3513	--	--	--	--	K03068	low density lipoprotein receptor-related protein 5/6	Q91VN0	Low-density lipoprotein receptor-related protein 5 OS=Mus musculus OX=10090 GN=Lrp5 PE=1 SV=3	PF06455	NADH dehydrogenase subunit 5 C-terminus	GO:0055114//GO:0006744//GO:0006120//GO:0042773//GO:0006814//GO:0015992	oxidation-reduction process//ubiquinone biosynthetic process//mitochondrial electron transport, NADH to ubiquinone//ATP synthesis coupled electron transport//sodium ion transport//proton transport	GO:0008137	NADH dehydrogenase (ubiquinone) activity	--	--	--	--
Cluster-1007.108440	281	--	--	--	--	--	--	--	--	--	--	--	--	--	--	--	--	--	--
Cluster-1007.20229	418	--	--	LC027336.1	Haliotis diversicolor genomic DNA, BAC clone: 005_rep_c27301	--	--	--	--	--	--	--	--	--	--	--	--	--	--
Cluster-1007.20228	1430	--	--	--	--	K12603	CCR4-NOT transcription complex subunit 6	Q4P9T3	Glucose-repressible alcohol dehydrogenase transcriptional effector OS=Ustilago maydis (strain 521 / FGSC 9021) OX=237631 GN=CCR4 PE=3 SV=1	--	--	--	--	--	--	--	--	KOG0620	Glucose-repressible alcohol dehydrogenase transcriptional effector CCR4 and related proteins
Cluster-1007.108403	491	--	--	--	--	--	--	--	--	--	--	--	--	--	--	--	--	--	--
Cluster-1007.20224	2404	--	--	XM_013230274.1	PREDICTED: Biomphalaria glabrata dual specificity mitogen-activated protein kinase kinase 1-like (LOC106070384), transcript variant X1, mRNA	--	--	--	--	PF02066//PF10890//PF02468	Metallothionein family 11//Protein of unknown function (DUF2741)//Photosystem II reaction centre N protein (psbN)	GO:0022900//GO:0015979	electron transport chain//photosynthesis	GO:0005507	copper ion binding	GO:0005743//GO:0016020//GO:0009539//GO:0009523//GO:0070469	mitochondrial inner membrane//membrane//photosystem II reaction center//photosystem II//respiratory chain	--	--
Cluster-1007.20227	403	--	--	--	--	--	--	--	--	--	--	--	--	--	--	--	--	--	--
Cluster-1007.20226	1154	--	--	--	--	--	--	--	--	--	--	--	--	--	--	--	--	--	--
Cluster-1007.20221	3769	--	--	--	--	--	--	--	--	PF05297	Herpesvirus latent membrane protein 1 (LMP1)	GO:0019087	transformation of host cell by virus	--	--	GO:0016021	integral component of membrane	--	--
Cluster-1007.20220	3812	--	--	--	--	--	--	--	--	PF05297	Herpesvirus latent membrane protein 1 (LMP1)	GO:0019087	transformation of host cell by virus	--	--	GO:0016021	integral component of membrane	--	--
Cluster-1007.20223	2185	--	--	LC027297.1	Haliotis diversicolor genomic DNA, BAC clone: 001_rep_c980	--	--	--	--	--	--	--	--	--	--	--	--	--	--
Cluster-1007.20222	617	--	--	--	--	--	--	--	--	PF13367	Protease prsW family	--	--	GO:0008233	peptidase activity	--	--	--	--
Cluster-1007.45835	2075	--	--	--	--	--	--	Q96RW7	Hemicentin-1 OS=Homo sapiens OX=9606 GN=HMCN1 PE=1 SV=2	PF13895//PF05699	Immunoglobulin domain//hAT family C-terminal dimerisation region	--	--	GO:0046983//GO:0005515	protein dimerization activity//protein binding	--	--	--	--
Cluster-1007.45834	624	--	--	--	--	--	--	--	--	PF14102//PF01498	Capsule biosynthesis CapC//Transposase	GO:0015074//GO:0045227//GO:0006313	DNA integration//capsule polysaccharide biosynthetic process//transposition, DNA-mediated	GO:0003677	DNA binding	GO:0016020	membrane	--	--
Cluster-1007.45837	375	--	--	--	--	--	--	--	--	PF01498	Transposase	GO:0006313//GO:0015074	transposition, DNA-mediated//DNA integration	GO:0003677	DNA binding	--	--	--	--
Cluster-1007.45836	450	--	--	--	--	--	--	--	--	--	--	--	--	--	--	--	--	--	--
Cluster-1007.45831	5100	--	--	XM_017705810.1	PREDICTED: Pygocentrus nattereri PR/SET domain 16 (prdm16), transcript variant X7, mRNA	K04462	ecotropic virus integration site 1 protein	Q6ZNH5	Zinc finger protein 497 OS=Homo sapiens OX=9606 GN=ZNF497 PE=1 SV=2	PF13465//PF16622//PF02892//PF13912//PF00096	Zinc-finger double domain//zinc-finger C2H2-type//BED zinc finger//C2H2-type zinc finger//Zinc finger, C2H2 type	--	--	GO:0046872//GO:0003677	metal ion binding//DNA binding	--	--	--	--
Cluster-1007.11653	784	--	--	CP013254.1	Kocuria flava strain HO-9041, complete genome	--	--	--	--	--	--	--	--	--	--	--	--	--	--
Cluster-1007.45833	1756	--	--	--	--	--	--	Q5JS13	Ras-specific guanine nucleotide-releasing factor RalGPS1 OS=Homo sapiens OX=9606 GN=RALGPS1 PE=1 SV=1	--	--	--	--	--	--	--	--	--	--
Cluster-1007.45832	591	--	--	LC027336.1	Haliotis diversicolor genomic DNA, BAC clone: 005_rep_c27301	--	--	--	--	--	--	--	--	--	--	--	--	--	--
Cluster-41542.0	2721	--	--	--	--	--	--	Q9V5L3	Probable cytochrome P450 49a1 OS=Drosophila melanogaster OX=7227 GN=Cyp49a1 PE=2 SV=3	PF00067	Cytochrome P450	GO:0055114	oxidation-reduction process	GO:0005506//GO:0020037//GO:0016705	iron ion binding//heme binding//oxidoreductase activity, acting on paired donors, with incorporation or reduction of molecular oxygen	--	--	KOG0159	Cytochrome P450 CYP11/CYP12/CYP24/CYP27 subfamilies
Cluster-1007.45839	6428	--	--	--	--	--	--	Q6DIB5	Multiple epidermal growth factor-like domains protein 10 OS=Mus musculus OX=10090 GN=Megf10 PE=1 SV=1	PF00102//PF00782//PF02183	Protein-tyrosine phosphatase//Dual specificity phosphatase, catalytic domain//Homeobox associated leucine zipper	GO:0006570//GO:0006355//GO:0006470	tyrosine metabolic process//regulation of transcription, DNA-templated//protein dephosphorylation	GO:0003700//GO:0004725//GO:0008138//GO:0043565	transcription factor activity, sequence-specific DNA binding//protein tyrosine phosphatase activity//protein tyrosine/serine/threonine phosphatase activity//sequence-specific DNA binding	GO:0005667	transcription factor complex	KOG1218	Proteins containing Ca2+-binding EGF-like domains
Cluster-1007.45838	283	--	--	--	--	--	--	--	--	PF05699	hAT family C-terminal dimerisation region	--	--	GO:0046983	protein dimerization activity	--	--	--	--
Cluster-36275.0	1511	--	--	--	--	--	--	--	--	PF02765	Telomeric single stranded DNA binding POT1/CDC13	GO:0000723	telomere maintenance	GO:0003677	DNA binding	GO:0000784	nuclear chromosome, telomeric region	--	--
Cluster-21004.0	383	--	--	--	--	--	--	--	--	--	--	--	--	--	--	--	--	--	--
Cluster-38963.0	907	--	--	--	--	K00251	3-oxo-5-beta-steroid 4-dehydrogenase	P51652	Aldo-keto reductase family 1 member C18 OS=Rattus norvegicus OX=10116 GN=Akr1c18 PE=1 SV=1	PF01316//PF07074	Arginine repressor, DNA binding domain//Translocon-associated protein, gamma subunit (TRAP-gamma)	GO:0006613//GO:0006355//GO:0006525	cotranslational protein targeting to membrane//regulation of transcription, DNA-templated//arginine metabolic process	GO:0003700	transcription factor activity, sequence-specific DNA binding	GO:0005667//GO:0030176//GO:0005784	transcription factor complex//integral component of endoplasmic reticulum membrane//Sec61 translocon complex	KOG1577	Aldo/keto reductase family proteins
Cluster-19699.0	791	--	--	NM_116511.4	Arabidopsis thaliana photosystem I subunit D-1 (PSAD-1), mRNA	--	--	Q9S7H1	Photosystem I reaction center subunit II-1, chloroplastic OS=Arabidopsis thaliana OX=3702 GN=psaD1 PE=1 SV=1	PF02531	PsaD	GO:0015979	photosynthesis	--	--	GO:0009538//GO:0009522	photosystem I reaction center//photosystem I	--	--
Cluster-2997.0	966	--	--	--	--	--	--	--	--	--	--	--	--	--	--	--	--	--	--
Cluster-1007.6037	655	--	--	--	--	--	--	--	--	--	--	--	--	--	--	--	--	--	--
Cluster-1007.138012	645	--	--	--	--	--	--	--	--	--	--	--	--	--	--	--	--	--	--
Cluster-1007.140090	510	--	--	XM_024164969.1	PREDICTED: Morus notabilis aspartic proteinase Asp1 (LOC21396540), transcript variant X3, mRNA	--	--	Q0IU52	Aspartic proteinase Asp1 OS=Oryza sativa subsp. japonica OX=39947 GN=ASP1 PE=2 SV=1	PF00026	Eukaryotic aspartyl protease	GO:0006508	proteolysis	GO:0004190	aspartic-type endopeptidase activity	--	--	--	--
Cluster-1007.140091	7981	--	--	XM_022459549.1	PREDICTED: Crassostrea virginica cyclin-G-associated kinase-like (LOC111119409), mRNA	K08855	cyclin G-associated kinase	O14976	Cyclin-G-associated kinase OS=Homo sapiens OX=9606 GN=GAK PE=1 SV=2	PF00102//PF05038//PF00782	Protein-tyrosine phosphatase//Cytochrome Cytochrome b558 alpha-subunit//Dual specificity phosphatase, catalytic domain	GO:0006470//GO:0006570	protein dephosphorylation//tyrosine metabolic process	GO:0020037//GO:0008138//GO:0004725	heme binding//protein tyrosine/serine/threonine phosphatase activity//protein tyrosine phosphatase activity	--	--	KOG0431	Auxilin-like protein and related proteins containing DnaJ domain
Cluster-1007.140092	2419	--	--	--	--	--	--	--	--	PF02740	Colipase, C-terminal domain	GO:0016042//GO:0007586	lipid catabolic process//digestion	GO:0008047	enzyme activator activity	GO:0005576	extracellular region	--	--
Cluster-1007.140093	2406	--	--	--	--	--	--	--	--	PF02740	Colipase, C-terminal domain	GO:0007586//GO:0016042	digestion//lipid catabolic process	GO:0008047	enzyme activator activity	GO:0005576	extracellular region	--	--
Cluster-1007.140094	268	--	--	KU351386.1	Haliotis discus discus galectin-4 gene, complete cds	--	--	--	--	--	--	--	--	--	--	--	--	--	--
Cluster-1007.140095	476	--	--	KU508828.1	Malus domestica cultivar Granny Smith phytoene desaturase protein mRNA, complete cds	--	--	P28554	Phytoene dehydrogenase, chloroplastic/chromoplastic OS=Solanum lycopersicum OX=4081 GN=PDS PE=2 SV=1	PF01494//PF07992//PF01266	FAD binding domain//Pyridine nucleotide-disulphide oxidoreductase//FAD dependent oxidoreductase	GO:0055114	oxidation-reduction process	GO:0016491//GO:0071949	oxidoreductase activity//FAD binding	--	--	--	--
Cluster-1007.140096	710	--	--	--	--	--	--	--	--	--	--	--	--	--	--	--	--	--	--
Cluster-1007.140097	834	--	--	--	--	--	--	Q0VBB0	PRELI domain-containing protein 2 OS=Mus musculus OX=10090 GN=Prelid2 PE=2 SV=1	--	--	--	--	--	--	--	--	--	--
Cluster-1007.140098	1422	--	--	HQ650376.1	Haliotis diversicolor clone Hdi93 microsatellite sequence	--	--	--	--	--	--	--	--	--	--	--	--	--	--
Cluster-1007.140099	849	--	--	LC027340.1	Haliotis diversicolor genomic DNA, BAC clone: 006_rep_c2412	--	--	--	--	--	--	--	--	--	--	--	--	--	--
Cluster-56.0	704	--	--	--	--	--	--	--	--	--	--	--	--	--	--	--	--	--	--
Cluster-1007.117929	2387	--	--	--	--	--	--	--	--	--	--	--	--	--	--	--	--	--	--
Cluster-1007.117920	232	--	--	--	--	--	--	--	--	--	--	--	--	--	--	--	--	--	--
Cluster-1007.117921	495	--	--	--	--	--	--	P28828	Receptor-type tyrosine-protein phosphatase mu OS=Mus musculus OX=10090 GN=Ptprm PE=1 SV=2	PF00102	Protein-tyrosine phosphatase	GO:0006470//GO:0006570	protein dephosphorylation//tyrosine metabolic process	GO:0004725	protein tyrosine phosphatase activity	--	--	--	--
Cluster-1007.117922	281	--	--	LC027336.1	Haliotis diversicolor genomic DNA, BAC clone: 005_rep_c27301	--	--	--	--	--	--	--	--	--	--	--	--	--	--
Cluster-1007.117923	446	--	--	--	--	--	--	--	--	--	--	--	--	--	--	--	--	--	--
Cluster-1007.117924	1582	--	--	--	--	--	--	--	--	--	--	--	--	--	--	--	--	--	--
Cluster-1007.117925	3298	--	--	LC027358.1	Haliotis diversicolor genomic DNA, BAC clone: 009_rep_c2377	--	--	Q96MB7	Putative nuclease HARBI1 OS=Homo sapiens OX=9606 GN=HARBI1 PE=1 SV=1	PF01047//PF09402//PF04827//PF08437//PF04545	MarR family//Man1-Src1p-C-terminal domain//Plant transposon protein//Glycosyl transferase family 8 C-terminal//Sigma-70, region 4	GO:0006355//GO:0006352//GO:0009103	regulation of transcription, DNA-templated//DNA-templated transcription, initiation//lipopolysaccharide biosynthetic process	GO:0016788//GO:0003700//GO:0008918//GO:0016987//GO:0003677	hydrolase activity, acting on ester bonds//transcription factor activity, sequence-specific DNA binding//lipopolysaccharide 3-alpha-galactosyltransferase activity//sigma factor activity//DNA binding	GO:0005667//GO:0005639	transcription factor complex//integral component of nuclear inner membrane	--	--
Cluster-1007.117926	1450	--	--	--	--	--	--	Q6AZB8	Putative nuclease HARBI1 OS=Danio rerio OX=7955 GN=harbi1 PE=2 SV=1	PF01609//PF04827//PF09402	Transposase DDE domain//Plant transposon protein//Man1-Src1p-C-terminal domain	GO:0006313	transposition, DNA-mediated	GO:0016788//GO:0004803//GO:0003677	hydrolase activity, acting on ester bonds//transposase activity//DNA binding	GO:0005639	integral component of nuclear inner membrane	--	--
Cluster-1007.117927	1202	--	--	XR_531728.2	PREDICTED: Malus x domestica hypersensitive-induced response protein 2-like (LOC103451866), misc_RNA	--	--	Q9CAR7	Hypersensitive-induced response protein 2 OS=Arabidopsis thaliana OX=3702 GN=HIR2 PE=1 SV=1	--	--	--	--	--	--	--	--	--	--
Cluster-12863.0	456	--	--	--	--	--	--	--	--	--	--	--	--	--	--	--	--	--	--
Cluster-32827.0	1586	--	--	AY952211.1	Haliotis fulgens clone Hful603 microsatellite sequence	--	--	--	--	--	--	--	--	--	--	--	--	--	--
Cluster-1007.21172	280	--	--	--	--	--	--	--	--	--	--	--	--	--	--	--	--	--	--
Cluster-1007.21173	1573	--	--	--	--	--	--	Q09575	Uncharacterized protein K02A2.6 OS=Caenorhabditis elegans OX=6239 GN=K02A2.6 PE=4 SV=1	PF00665	Integrase core domain	GO:0015074	DNA integration	--	--	--	--	KOG0017	FOG: Transposon-encoded proteins with TYA, reverse transcriptase, integrase domains in various combinations
Cluster-1007.21170	2211	--	--	--	--	--	--	--	--	PF00096//PF13912//PF13465	Zinc finger, C2H2 type//C2H2-type zinc finger//Zinc-finger double domain	--	--	GO:0046872	metal ion binding	--	--	KOG1721	FOG: Zn-finger
Cluster-1007.21171	236	--	--	--	--	--	--	--	--	--	--	--	--	--	--	--	--	--	--
Cluster-1007.21176	908	--	--	MF113042.1	Haliotis rubra isolate HB3 28S ribosomal RNA gene, partial sequence; 28S-18S ribosomal RNA intergenic spacer, complete sequence; and 18S ribosomal RNA gene, partial sequence	--	--	--	--	--	--	--	--	--	--	--	--	--	--
Cluster-1007.21177	468	--	--	--	--	--	--	--	--	--	--	--	--	--	--	--	--	--	--
Cluster-1007.21174	307	--	--	KU096999.1	Abalone herpesvirus Taiwan/2005, complete genome	--	--	--	--	--	--	--	--	--	--	--	--	--	--
Cluster-8800.0	763	--	--	--	--	K07438	25-hydroxyvitamin D3 1alpha-hydroxylase	Q9DBG1	Sterol 26-hydroxylase, mitochondrial OS=Mus musculus OX=10090 GN=Cyp27a1 PE=1 SV=1	PF00067	Cytochrome P450	GO:0055114	oxidation-reduction process	GO:0016705//GO:0005506//GO:0020037	oxidoreductase activity, acting on paired donors, with incorporation or reduction of molecular oxygen//iron ion binding//heme binding	--	--	--	--
Cluster-1007.21178	751	--	--	--	--	--	--	--	--	--	--	--	--	--	--	--	--	--	--
Cluster-1007.21179	4984	--	--	XM_014284192.1	PREDICTED: Falco cherrug anoctamin 8 (ANO8), mRNA	K19502	anoctamin-8	Q9HCE9	Anoctamin-8 OS=Homo sapiens OX=9606 GN=ANO8 PE=1 SV=3	--	--	--	--	--	--	--	--	--	--
Cluster-1007.11657	649	--	--	CP023676.1	Cutibacterium acnes strain ATCC 6919 chromosome, complete genome	--	--	--	--	--	--	--	--	--	--	--	--	--	--
Cluster-1007.101923	1164	--	--	LC027342.1	Haliotis diversicolor genomic DNA, BAC clone: 006_rep_c2414	--	--	--	--	--	--	--	--	--	--	--	--	--	--
Cluster-1007.101922	994	--	--	--	--	--	--	--	--	--	--	--	--	--	--	--	--	--	--
Cluster-1007.101921	1363	--	--	--	--	--	--	--	--	--	--	--	--	--	--	--	--	--	--
Cluster-1007.101920	1291	--	--	LC027297.1	Haliotis diversicolor genomic DNA, BAC clone: 001_rep_c980	--	--	--	--	--	--	--	--	--	--	--	--	--	--
Cluster-1007.101927	247	--	--	LC027306.1	Haliotis diversicolor genomic DNA, BAC clone: 002_c6	--	--	--	--	--	--	--	--	--	--	--	--	--	--
Cluster-1007.101926	1537	--	--	--	--	--	--	--	--	PF09392	Type III secretion needle MxiH, YscF, SsaG, EprI, PscF, EscF	GO:0015031//GO:0009405	protein transport//pathogenesis	--	--	--	--	--	--
Cluster-1007.101925	333	--	--	FJ607698.1	Haliotis diversicolor microsatellite HUHD16 sequence	--	--	--	--	--	--	--	--	--	--	--	--	--	--
Cluster-1007.101924	786	--	--	LC027342.1	Haliotis diversicolor genomic DNA, BAC clone: 006_rep_c2414	--	--	--	--	--	--	--	--	--	--	--	--	--	--
Cluster-45274.0	966	--	--	--	--	--	--	--	--	--	--	--	--	--	--	--	--	--	--
Cluster-1007.101929	757	--	--	--	--	--	--	--	--	--	--	--	--	--	--	--	--	--	--
Cluster-1007.101928	332	--	--	LC027302.1	Haliotis diversicolor genomic DNA, BAC clone: 002_c2	--	--	--	--	--	--	--	--	--	--	--	--	--	--
Cluster-19538.0	1169	--	--	XM_024496243.1	Echinococcus granulosus Eukaryotic initiation factor 4A (EGR_06994), partial mRNA	K03257	translation initiation factor 4A	Q2HFP1	ATP-dependent RNA helicase eIF4A OS=Chaetomium globosum (strain ATCC 6205 / CBS 148.51 / DSM 1962 / NBRC 6347 / NRRL 1970) OX=306901 GN=TIF1 PE=3 SV=1	PF00270//PF07652//PF00580//PF04851	DEAD/DEAH box helicase//Flavivirus DEAD domain//UvrD/REP helicase N-terminal domain//Type III restriction enzyme, res subunit	GO:0019079	viral genome replication	GO:0003677//GO:0005524//GO:0003676//GO:0016787//GO:0008026	DNA binding//ATP binding//nucleic acid binding//hydrolase activity//ATP-dependent helicase activity	--	--	KOG0327	Translation initiation factor 4F, helicase subunit (eIF-4A) and related helicases
Cluster-1007.41688	249	--	--	--	--	--	--	--	--	--	--	--	--	--	--	--	--	--	--
Cluster-1007.41689	7914	--	--	--	--	K05126	proto-oncogene tyrosine-protein kinase Ret	G3V9H8	Proto-oncogene tyrosine-protein kinase receptor Ret OS=Rattus norvegicus OX=10116 GN=Ret PE=1 SV=1	PF03854//PF00041//PF07714//PF00069	P-11 zinc finger//Fibronectin type III domain//Protein tyrosine kinase//Protein kinase domain	GO:0006468	protein phosphorylation	GO:0008270//GO:0005524//GO:0005515//GO:0003723//GO:0004672	zinc ion binding//ATP binding//protein binding//RNA binding//protein kinase activity	--	--	--	--
Cluster-13995.0	452	--	--	--	--	--	--	--	--	--	--	--	--	--	--	--	--	--	--
Cluster-35711.0	866	--	--	--	--	--	--	--	--	--	--	--	--	--	--	--	--	--	--
Cluster-1007.41682	1600	--	--	--	--	--	--	--	--	PF15957	Commissureless	GO:0007411	axon guidance	--	--	--	--	--	--
Cluster-1007.41683	1464	--	--	LC027342.1	Haliotis diversicolor genomic DNA, BAC clone: 006_rep_c2414	--	--	--	--	PF15957	Commissureless	GO:0007411	axon guidance	--	--	--	--	--	--
Cluster-1007.41680	1496	--	--	--	--	--	--	--	--	--	--	--	--	--	--	--	--	--	--
Cluster-1007.41681	304	--	--	LC027342.1	Haliotis diversicolor genomic DNA, BAC clone: 006_rep_c2414	--	--	--	--	--	--	--	--	--	--	--	--	--	--
Cluster-1007.41686	3327	--	--	LC027303.1	Haliotis diversicolor genomic DNA, BAC clone: 002_c3	--	--	--	--	PF15225	Interleukin 32	GO:0006955	immune response	--	--	--	--	--	--
Cluster-1007.41687	1278	--	--	LC027342.1	Haliotis diversicolor genomic DNA, BAC clone: 006_rep_c2414	--	--	--	--	--	--	--	--	--	--	--	--	--	--
Cluster-1007.41684	310	--	--	LC027303.1	Haliotis diversicolor genomic DNA, BAC clone: 002_c3	--	--	--	--	--	--	--	--	--	--	--	--	--	--
Cluster-1007.41685	3333	--	--	LC027303.1	Haliotis diversicolor genomic DNA, BAC clone: 002_c3	--	--	--	--	PF15225	Interleukin 32	GO:0006955	immune response	--	--	--	--	--	--
Cluster-1007.139234	359	--	--	--	--	--	--	--	--	--	--	--	--	--	--	--	--	--	--
Cluster-33511.0	2180	--	--	--	--	--	--	B3A0S3	EGF-like domain-containing protein 2 OS=Lottia gigantea OX=225164 PE=1 SV=1	PF00008	EGF-like domain	--	--	GO:0005515	protein binding	--	--	KOG1217	Fibrillins and related proteins containing Ca2+-binding EGF-like domains
Cluster-1007.95128	364	--	--	LC027340.1	Haliotis diversicolor genomic DNA, BAC clone: 006_rep_c2412	--	--	--	--	--	--	--	--	--	--	--	--	--	--
Cluster-1007.95129	1255	--	--	--	--	K10693	E3 ubiquitin-protein ligase MYCBP2	O75592	E3 ubiquitin-protein ligase MYCBP2 OS=Homo sapiens OX=9606 GN=MYCBP2 PE=1 SV=3	--	--	--	--	--	--	--	--	KOG1428	Inhibitor of type V adenylyl cyclases/Neuronal presynaptic protein Highwire/PAM/RPM-1
Cluster-1007.95126	822	--	--	XM_013249859.1	PREDICTED: Stomoxys calcitrans RNA-binding protein pno1 (LOC106085554), transcript variant X2, mRNA	K11884	RNA-binding protein PNO1	Q8AVH4	RNA-binding protein PNO1 OS=Xenopus laevis OX=8355 GN=pno1 PE=2 SV=1	PF00013	KH domain	--	--	GO:0003723	RNA binding	--	--	KOG3273	Predicted RNA-binding protein Pno1p interacting with Nob1p and involved in 26S proteasome assembly
Cluster-1007.95127	318	--	--	LC027341.1	Haliotis diversicolor genomic DNA, BAC clone: 006_rep_c2413	--	--	--	--	--	--	--	--	--	--	--	--	--	--
Cluster-1007.95124	621	--	--	DQ785770.1	Haliotis midae clone HmR39T microsatellite sequence	--	--	--	--	--	--	--	--	--	--	--	--	--	--
Cluster-1007.95125	609	--	--	DQ785770.1	Haliotis midae clone HmR39T microsatellite sequence	--	--	--	--	--	--	--	--	--	--	--	--	--	--
Cluster-1007.95122	2783	--	--	--	--	--	--	--	--	--	--	--	--	--	--	--	--	--	--
Cluster-1007.95123	3596	--	--	XM_013270107.2	PREDICTED: Oreochromis niloticus autophagy related 9A (atg9a), transcript variant X2, mRNA	K17907	autophagy-related protein 9	Q5RCS0	Autophagy-related protein 9A OS=Pongo abelii OX=9601 GN=ATG9A PE=2 SV=1	PF01105	emp24/gp25L/p24 family/GOLD	GO:0006810	transport	--	--	GO:0016021	integral component of membrane	KOG2173	Integral membrane protein
Cluster-1007.95120	276	--	--	--	--	--	--	--	--	--	--	--	--	--	--	--	--	--	--
Cluster-1007.95121	2794	--	--	--	--	--	--	--	--	--	--	--	--	--	--	--	--	--	--
Cluster-40629.1	1997	--	--	XM_019893529.1	PREDICTED: Hippocampus comes histone acetyltransferase KAT7-like (LOC109530028), transcript variant X5, mRNA	K11307	histone acetyltransferase MYST2	Q5SVQ0	Histone acetyltransferase KAT7 OS=Mus musculus OX=10090 GN=Kat7 PE=1 SV=1	PF01530//PF13673//PF01853//PF13508	Zinc finger, C2HC type//Acetyltransferase (GNAT) domain//MOZ/SAS family//Acetyltransferase (GNAT) domain	GO:0042967//GO:0006355	acyl-carrier-protein biosynthetic process//regulation of transcription, DNA-templated	GO:0008080//GO:0003700//GO:0016747//GO:0008270	N-acetyltransferase activity//transcription factor activity, sequence-specific DNA binding//transferase activity, transferring acyl groups other than amino-acyl groups//zinc ion binding	GO:0005634//GO:0005667	nucleus//transcription factor complex	KOG2747	Histone acetyltransferase (MYST family)
Cluster-40629.0	2014	--	--	XM_019893529.1	PREDICTED: Hippocampus comes histone acetyltransferase KAT7-like (LOC109530028), transcript variant X5, mRNA	K11307	histone acetyltransferase MYST2	Q5SVQ0	Histone acetyltransferase KAT7 OS=Mus musculus OX=10090 GN=Kat7 PE=1 SV=1	PF13673//PF01853//PF13508//PF01530	Acetyltransferase (GNAT) domain//MOZ/SAS family//Acetyltransferase (GNAT) domain//Zinc finger, C2HC type	GO:0006355//GO:0042967	regulation of transcription, DNA-templated//acyl-carrier-protein biosynthetic process	GO:0008080//GO:0003700//GO:0016747//GO:0008270	N-acetyltransferase activity//transcription factor activity, sequence-specific DNA binding//transferase activity, transferring acyl groups other than amino-acyl groups//zinc ion binding	GO:0005634//GO:0005667	nucleus//transcription factor complex	KOG2747	Histone acetyltransferase (MYST family)
Cluster-17411.0	941	--	--	--	--	--	--	--	--	--	--	--	--	--	--	--	--	--	--
Cluster-18685.0	639	--	--	NM_127156.4	Arabidopsis thaliana cold regulated 413 plasma membrane 1 (COR413-PM1), mRNA	--	--	Q9XIM7	Cold-regulated 413 plasma membrane protein 1 OS=Arabidopsis thaliana OX=3702 GN=COR413PM1 PE=2 SV=1	--	--	--	--	--	--	--	--	--	--
Cluster-41588.0	602	--	--	--	--	--	--	--	--	--	--	--	--	--	--	--	--	--	--
Cluster-26794.0	574	--	--	--	--	--	--	--	--	--	--	--	--	--	--	--	--	--	--
Cluster-31001.0	1195	--	--	--	--	--	--	--	--	--	--	--	--	--	--	--	--	--	--
Cluster-44783.0	642	--	--	--	--	--	--	--	--	--	--	--	--	--	--	--	--	--	--
Cluster-1007.8823	540	--	--	--	--	--	--	--	--	--	--	--	--	--	--	--	--	--	--
Cluster-10410.0	592	--	--	--	--	--	--	--	--	--	--	--	--	--	--	--	--	--	--
Cluster-1007.147706	438	--	--	--	--	--	--	--	--	--	--	--	--	--	--	--	--	--	--
Cluster-31316.0	857	--	--	LC027326.1	Haliotis diversicolor genomic DNA, BAC clone: 003_rep_c698	--	--	--	--	--	--	--	--	--	--	--	--	--	--
Cluster-1007.10435	1548	--	--	--	--	--	--	--	--	PF03859	CG-1 domain	--	--	GO:0003677	DNA binding	GO:0005634	nucleus	--	--
Cluster-38017.2	1174	--	--	--	--	--	--	--	--	--	--	--	--	--	--	--	--	--	--
Cluster-22148.0	570	--	--	--	--	--	--	--	--	--	--	--	--	--	--	--	--	--	--
Cluster-38017.0	817	--	--	--	--	--	--	--	--	--	--	--	--	--	--	--	--	--	--
Cluster-46155.0	873	--	--	LC027302.1	Haliotis diversicolor genomic DNA, BAC clone: 002_c2	--	--	--	--	--	--	--	--	--	--	--	--	--	--
Cluster-43003.0	835	--	--	--	--	--	--	--	--	PF00412	LIM domain	--	--	GO:0008270	zinc ion binding	--	--	--	--
Cluster-7019.0	213	--	--	--	--	--	--	--	--	--	--	--	--	--	--	--	--	--	--
Cluster-36435.0	821	--	--	--	--	K01446	N-acetylmuramoyl-L-alanine amidase	Q96PD5	N-acetylmuramoyl-L-alanine amidase OS=Homo sapiens OX=9606 GN=PGLYRP2 PE=1 SV=1	PF01510//PF07936	N-acetylmuramoyl-L-alanine amidase//Potassium-channel blocking toxin	GO:0006807//GO:0009253//GO:0009405//GO:0006810//GO:0009252	nitrogen compound metabolic process//peptidoglycan catabolic process//pathogenesis//transport//peptidoglycan biosynthetic process	GO:0008745//GO:0008200	N-acetylmuramoyl-L-alanine amidase activity//ion channel inhibitor activity	GO:0042151	nematocyst	--	--
Cluster-27754.0	230	--	--	--	--	--	--	--	--	PF04554//PF15723//PF00543	Extensin-like region//Motility quorum-sensing regulator, toxin of MqsA//Nitrogen regulatory protein P-II	GO:0006808//GO:0009664//GO:0042710//GO:0042546//GO:0009372//GO:0017148	regulation of nitrogen utilization//plant-type cell wall organization//biofilm formation//cell wall biogenesis//quorum sensing//negative regulation of translation	GO:0030234//GO:0005199	enzyme regulator activity//structural constituent of cell wall	GO:0005618	cell wall	--	--
Cluster-1007.108409	4393	--	--	LC027337.1	Haliotis diversicolor genomic DNA, BAC clone: 005_rep_c2730	--	--	--	--	--	--	--	--	--	--	--	--	--	--
Cluster-1007.72486	5271	--	--	--	--	K17391	insulin-like growth factor 2 mRNA-binding protein 1	O57526	Insulin-like growth factor 2 mRNA-binding protein 3-B OS=Xenopus laevis OX=8355 GN=igf2bp3-b PE=1 SV=1	PF07650//PF08417//PF13014//PF00760//PF00076//PF06444//PF13184//PF00013//PF02166	KH domain//Pheophorbide a oxygenase//KH domain//Cucumovirus coat protein//RNA recognition motif. (a.k.a. RRM, RBD, or RNP domain)//NADH dehydrogenase subunit 2 C-terminus//NusA-like KH domain//KH domain//Androgen receptor	GO:0007165//GO:0015992//GO:0006120//GO:0006355//GO:0055114//GO:0006814//GO:0006744//GO:0030521	signal transduction//proton transport//mitochondrial electron transport, NADH to ubiquinone//regulation of transcription, DNA-templated//oxidation-reduction process//sodium ion transport//ubiquinone biosynthetic process//androgen receptor signaling pathway	GO:0003677//GO:0003676//GO:0003723//GO:0008137//GO:0010277//GO:0004882//GO:0005496	DNA binding//nucleic acid binding//RNA binding//NADH dehydrogenase (ubiquinone) activity//chlorophyllide a oxygenase [overall] activity//androgen receptor activity//steroid binding	GO:0019028//GO:0005634	viral capsid//nucleus	KOG2193	IGF-II mRNA-binding protein IMP, contains RRM and KH domains
Cluster-1007.133517	447	--	--	--	--	--	--	--	--	--	--	--	--	--	--	--	--	--	--
Cluster-1007.113339	415	--	--	--	--	--	--	--	--	--	--	--	--	--	--	--	--	--	--
Cluster-1007.113338	511	--	--	--	--	--	--	--	--	--	--	--	--	--	--	--	--	--	--
Cluster-1007.36934	272	--	--	LC027358.1	Haliotis diversicolor genomic DNA, BAC clone: 009_rep_c2377	--	--	--	--	--	--	--	--	--	--	--	--	--	--
Cluster-1007.36935	447	--	--	HQ650531.1	Haliotis diversicolor clone Hdi3-78 microsatellite sequence	--	--	--	--	--	--	--	--	--	--	--	--	--	--
Cluster-1007.36932	1572	--	--	LC027339.1	Haliotis diversicolor genomic DNA, BAC clone: 006_rep_c2411	--	--	--	--	PF00075	RNase H	GO:0051252	regulation of RNA metabolic process	GO:0003676//GO:0004523	nucleic acid binding//RNA-DNA hybrid ribonuclease activity	--	--	--	--
Cluster-1007.36933	985	--	--	HQ650445.1	Haliotis diversicolor clone Hdi3-168 microsatellite sequence	--	--	--	--	--	--	--	--	--	--	--	--	--	--
Cluster-1007.36930	493	--	--	--	--	--	--	--	--	--	--	--	--	--	--	--	--	--	--
Cluster-1007.36931	593	--	--	LC027330.1	Haliotis diversicolor genomic DNA, BAC clone: 003_rep_c702	--	--	--	--	--	--	--	--	--	--	--	--	--	--
Cluster-1007.113331	2670	--	--	--	--	K01081	5'-nucleotidase	P21589	5'-nucleotidase OS=Homo sapiens OX=9606 GN=NT5E PE=1 SV=1	PF02872//PF03176//PF00149	5'-nucleotidase, C-terminal domain//MMPL family//Calcineurin-like phosphoesterase	GO:0009166	nucleotide catabolic process	GO:0016787	hydrolase activity	GO:0016020	membrane	--	--
Cluster-1007.113330	2695	--	--	--	--	K01081	5'-nucleotidase	P21589	5'-nucleotidase OS=Homo sapiens OX=9606 GN=NT5E PE=1 SV=1	PF02872//PF03176//PF00149	5'-nucleotidase, C-terminal domain//MMPL family//Calcineurin-like phosphoesterase	GO:0009166	nucleotide catabolic process	GO:0016787	hydrolase activity	GO:0016020	membrane	--	--
Cluster-1007.113333	610	--	--	--	--	--	--	B3A0N5	Apyrase OS=Tabanus yao OX=485572 PE=1 SV=1	PF02872	5'-nucleotidase, C-terminal domain	GO:0009166	nucleotide catabolic process	GO:0016787	hydrolase activity	--	--	--	--
Cluster-1007.113332	514	--	--	--	--	--	--	--	--	--	--	--	--	--	--	--	--	--	--
Cluster-1007.113335	231	--	--	--	--	--	--	--	--	--	--	--	--	--	--	--	--	--	--
Cluster-1007.113334	237	--	--	--	--	--	--	--	--	--	--	--	--	--	--	--	--	--	--
Cluster-1007.113337	346	--	--	--	--	--	--	--	--	--	--	--	--	--	--	--	--	--	--
Cluster-1007.36939	2355	--	--	LC027302.1	Haliotis diversicolor genomic DNA, BAC clone: 002_c2	--	--	--	--	--	--	--	--	--	--	--	--	--	--
Cluster-1007.42339	577	--	--	--	--	--	--	--	--	--	--	--	--	--	--	--	--	--	--
Cluster-1007.42338	526	--	--	--	--	--	--	--	--	--	--	--	--	--	--	--	--	--	--
Cluster-26547.0	899	--	--	--	--	--	--	--	--	--	--	--	--	--	--	--	--	--	--
Cluster-1007.42333	577	--	--	--	--	--	--	--	--	--	--	--	--	--	--	--	--	--	--
Cluster-1007.42332	689	--	--	--	--	--	--	--	--	PF02980	Restriction endonuclease FokI, catalytic domain	GO:0006308//GO:0009307	DNA catabolic process//DNA restriction-modification system	GO:0009036//GO:0003677	Type II site-specific deoxyribonuclease activity//DNA binding	GO:0009359	Type II site-specific deoxyribonuclease complex	--	--
Cluster-1007.42331	227	--	--	AB183456.1	Haliotis diversicolor MIP-II gene for molluscan indoleamine 2,3-dioxygenase like protein II, exon 1-6, partial cds	--	--	--	--	--	--	--	--	--	--	--	--	--	--
Cluster-1007.42330	251	--	--	--	--	--	--	--	--	--	--	--	--	--	--	--	--	--	--
Cluster-1007.42337	760	--	--	--	--	--	--	Q9EPW9	Toll-like receptor 6 OS=Mus musculus OX=10090 GN=Tlr6 PE=1 SV=2	PF13676//PF01582	TIR domain//TIR domain	GO:0007165	signal transduction	GO:0005515	protein binding	--	--	--	--
Cluster-1007.42336	1485	--	--	--	--	--	--	--	--	PF16276	Nucleophosmin C-terminal domain	--	--	GO:0003676	nucleic acid binding	--	--	--	--
Cluster-1007.42335	755	--	--	--	--	--	--	--	--	--	--	--	--	--	--	--	--	--	--
Cluster-1007.42334	711	--	--	--	--	--	--	--	--	PF00002	7 transmembrane receptor (Secretin family)	GO:0007186	G-protein coupled receptor signaling pathway	GO:0004930	G-protein coupled receptor activity	GO:0016021	integral component of membrane	--	--
Cluster-6812.0	422	--	--	--	--	--	--	Q8I7P9	Retrovirus-related Pol polyprotein from transposon opus OS=Drosophila melanogaster OX=7227 GN=pol PE=3 SV=1	--	--	--	--	--	--	--	--	KOG0017	FOG: Transposon-encoded proteins with TYA, reverse transcriptase, integrase domains in various combinations
Cluster-1007.144089	858	--	--	--	--	--	--	Q8CAK3	Repressor of yield of DENV protein homolog OS=Mus musculus OX=10090 GN=Ryden PE=2 SV=1	--	--	--	--	--	--	--	--	--	--
Cluster-1007.144088	270	--	--	--	--	--	--	--	--	--	--	--	--	--	--	--	--	--	--
Cluster-1007.121176	672	--	--	--	--	--	--	--	--	--	--	--	--	--	--	--	--	--	--
Cluster-1007.114649	2077	--	--	--	--	--	--	--	--	--	--	--	--	--	--	--	--	--	--
Cluster-1007.121174	3989	--	--	--	--	--	--	D3ZGS3	Inositol polyphosphate 5-phosphatase OCRL-1 OS=Rattus norvegicus OX=10116 GN=Ocrl PE=1 SV=1	PF00620//PF05956	RhoGAP domain//APC basic domain	GO:0007165//GO:0016055	signal transduction//Wnt signaling pathway	GO:0008017	microtubule binding	GO:0045298	tubulin complex	KOG0566	Inositol-1,4,5-triphosphate 5-phosphatase (synaptojanin), INP51/INP52/INP53 family
Cluster-1007.121175	466	--	--	--	--	--	--	--	--	--	--	--	--	--	--	--	--	--	--
Cluster-1007.121172	582	--	--	LC027342.1	Haliotis diversicolor genomic DNA, BAC clone: 006_rep_c2414	--	--	--	--	--	--	--	--	--	--	--	--	--	--
Cluster-1007.121173	433	--	--	--	--	--	--	--	--	--	--	--	--	--	--	--	--	--	--
Cluster-1007.121170	576	--	--	--	--	--	--	Q58588	Uncharacterized protein MJ1187 OS=Methanocaldococcus jannaschii (strain ATCC 43067 / DSM 2661 / JAL-1 / JCM 10045 / NBRC 100440) OX=243232 GN=MJ1187 PE=1 SV=1	PF00390	Malic enzyme, N-terminal domain	GO:0055114//GO:0015976//GO:0006108//GO:0006099//GO:0006090	oxidation-reduction process//carbon utilization//malate metabolic process//tricarboxylic acid cycle//pyruvate metabolic process	GO:0004471	malate dehydrogenase (decarboxylating) (NAD+) activity	--	--	--	--
Cluster-1007.121171	1934	--	--	--	--	--	--	--	--	PF00501	AMP-binding enzyme	GO:0008152	metabolic process	GO:0003824	catalytic activity	--	--	--	--
Cluster-1007.114640	1232	--	--	AB178074.1	Haliotis discus hannai DNA, microsatellite marker Hd715	--	--	--	--	--	--	--	--	--	--	--	--	--	--
Cluster-1007.114641	400	--	--	--	--	--	--	--	--	--	--	--	--	--	--	--	--	--	--
Cluster-1007.114642	837	--	--	LC027332.1	Haliotis diversicolor genomic DNA, BAC clone: 004_rep_c861	--	--	--	--	--	--	--	--	--	--	--	--	--	--
Cluster-1007.114643	4224	--	--	--	--	--	--	Q24423	Zinc finger protein Noc OS=Drosophila melanogaster OX=7227 GN=noc PE=1 SV=1	PF00096	Zinc finger, C2H2 type	--	--	GO:0046872	metal ion binding	--	--	--	--
Cluster-1007.114644	3217	--	--	--	--	--	--	Q24423	Zinc finger protein Noc OS=Drosophila melanogaster OX=7227 GN=noc PE=1 SV=1	PF00096	Zinc finger, C2H2 type	--	--	GO:0046872	metal ion binding	--	--	--	--
Cluster-1007.114645	1498	--	--	LC027337.1	Haliotis diversicolor genomic DNA, BAC clone: 005_rep_c2730	--	--	--	--	--	--	--	--	--	--	--	--	--	--
Cluster-1007.121178	520	--	--	--	--	--	--	--	--	--	--	--	--	--	--	--	--	--	--
Cluster-1007.121179	353	--	--	GU996125.1	Haliotis discus hannai clone CHh510 microsatellite sequence	--	--	--	--	PF00075	RNase H	GO:0051252	regulation of RNA metabolic process	GO:0003676//GO:0004523	nucleic acid binding//RNA-DNA hybrid ribonuclease activity	--	--	--	--
Cluster-13189.0	723	--	--	--	--	--	--	--	--	--	--	--	--	--	--	--	--	--	--
Cluster-4606.0	1652	--	--	XM_008365567.2	PREDICTED: Malus x domestica glutamate-1-semialdehyde 2,1-aminomutase, chloroplastic-like (LOC103427512), mRNA	--	--	Q85WB7	Glutamate-1-semialdehyde 2,1-aminomutase, chloroplastic OS=Brassica napus OX=3708 GN=GSA PE=2 SV=1	PF00155//PF00202	Aminotransferase class I and II//Aminotransferase class-III	GO:0009058	biosynthetic process	GO:0008483//GO:0030170	transaminase activity//pyridoxal phosphate binding	--	--	KOG1402	Ornithine aminotransferase
Cluster-1007.91719	3935	--	--	--	--	--	--	--	--	PF00819	Myotoxin, crotamine	GO:0044564	envenomation resulting in occlusion of the pore of voltage-gated potassium channel in other organism	--	--	--	--	--	--
Cluster-1007.91718	668	--	--	--	--	--	--	--	--	--	--	--	--	--	--	--	--	--	--
Cluster-1007.91711	289	--	--	--	--	--	--	--	--	--	--	--	--	--	--	--	--	--	--
Cluster-1007.91710	214	--	--	--	--	--	--	--	--	--	--	--	--	--	--	--	--	--	--
Cluster-1007.91713	627	--	--	LC027335.1	Haliotis diversicolor genomic DNA, BAC clone: 004_rep_c864	--	--	--	--	--	--	--	--	--	--	--	--	--	--
Cluster-4787.0	839	--	--	--	--	--	--	--	--	--	--	--	--	--	--	--	--	--	--
Cluster-1007.91715	2125	--	--	--	--	K01930	folylpolyglutamate synthase	Q05932	Folylpolyglutamate synthase, mitochondrial OS=Homo sapiens OX=9606 GN=FPGS PE=1 SV=3	PF13397	RNA polymerase-binding protein	GO:0045893	positive regulation of transcription, DNA-templated	GO:0001000	bacterial-type RNA polymerase core enzyme binding	--	--	--	--
Cluster-1007.91714	620	--	--	LC027312.1	Haliotis diversicolor genomic DNA, BAC clone: 002_c12	--	--	--	--	--	--	--	--	--	--	--	--	--	--
Cluster-1007.91717	9891	--	--	--	--	--	--	--	--	PF14991//PF00057//PF01064	Protein melan-A//Low-density lipoprotein receptor domain class A//Activin types I and II receptor domain	GO:0009069//GO:0007178//GO:0016310	serine family amino acid metabolic process//transmembrane receptor protein serine/threonine kinase signaling pathway//phosphorylation	GO:0004675//GO:0005515	transmembrane receptor protein serine/threonine kinase activity//protein binding	GO:0016020//GO:0042470	membrane//melanosome	--	--
Cluster-1007.91716	1945	--	--	--	--	--	--	--	--	PF02166	Androgen receptor	GO:0030521//GO:0006355//GO:0007165	androgen receptor signaling pathway//regulation of transcription, DNA-templated//signal transduction	GO:0005496//GO:0004882//GO:0003677	steroid binding//androgen receptor activity//DNA binding	GO:0005634	nucleus	--	--
Cluster-1007.66010	1805	--	--	GU995857.1	Haliotis discus hannai microsatellite CHh059 sequence	--	--	--	--	--	--	--	--	--	--	--	--	--	--
Cluster-42564.0	1708	--	--	--	--	--	--	--	--	--	--	--	--	--	--	--	--	--	--
Cluster-30985.0	280	--	--	--	--	--	--	--	--	--	--	--	--	--	--	--	--	--	--
Cluster-13465.0	894	--	--	--	--	--	--	--	--	--	--	--	--	--	--	--	--	--	--
Cluster-19871.0	552	--	--	--	--	--	--	--	--	PF01412	Putative GTPase activating protein for Arf	--	--	GO:0005096	GTPase activator activity	--	--	--	--
Cluster-18240.0	302	--	--	HQ650263.1	Haliotis diversicolor clone Hdi71 microsatellite sequence	--	--	--	--	--	--	--	--	--	--	--	--	--	--
Cluster-1007.35170	226	--	--	--	--	--	--	--	--	PF00157//PF09497//PF05461	Pou domain - N-terminal to homeobox domain//Transcription mediator complex subunit Med12//Apolipoprotein L	GO:0006869//GO:0006355//GO:0006357//GO:0042157	lipid transport//regulation of transcription, DNA-templated//regulation of transcription from RNA polymerase II promoter//lipoprotein metabolic process	GO:0003700//GO:0008289//GO:0001104	transcription factor activity, sequence-specific DNA binding//lipid binding//RNA polymerase II transcription cofactor activity	GO:0005667//GO:0005576//GO:0016592	transcription factor complex//extracellular region//mediator complex	--	--
Cluster-47293.0	1807	--	--	--	--	K07555	ATP synthase mitochondrial F1 complex assembly factor 1	Q66JD1	ATP synthase mitochondrial F1 complex assembly factor 1 OS=Xenopus tropicalis OX=8364 GN=atpaf1 PE=2 SV=1	PF05445//PF06644	Poxvirus serine/threonine protein kinase//ATP11 protein	GO:0006461	protein complex assembly	GO:0004672//GO:0005524	protein kinase activity//ATP binding	GO:0005739	mitochondrion	KOG3281	Mitochondrial F1-ATPase assembly protein
Cluster-19952.0	692	--	--	--	--	--	--	--	--	--	--	--	--	--	--	--	--	--	--
Cluster-44216.0	921	--	--	--	--	K10595	E3 ubiquitin-protein ligase HERC2	Q4U2R1	E3 ubiquitin-protein ligase HERC2 OS=Mus musculus OX=10090 GN=Herc2 PE=1 SV=3	--	--	--	--	--	--	--	--	KOG1426	FOG: RCC1 domain
Cluster-4947.0	961	--	--	LC027304.1	Haliotis diversicolor genomic DNA, BAC clone: 002_c4	--	--	--	--	--	--	--	--	--	--	--	--	--	--
Cluster-7525.0	725	--	--	XR_530692.2	PREDICTED: Malus x domestica uncharacterized LOC103444778 (LOC103444778), ncRNA	--	--	--	--	--	--	--	--	--	--	--	--	--	--
Cluster-1007.35177	211	--	--	--	--	--	--	--	--	PF00157	Pou domain - N-terminal to homeobox domain	GO:0006355	regulation of transcription, DNA-templated	GO:0003700	transcription factor activity, sequence-specific DNA binding	GO:0005667	transcription factor complex	--	--
Cluster-1007.8712	569	--	--	LC027358.1	Haliotis diversicolor genomic DNA, BAC clone: 009_rep_c2377	--	--	--	--	--	--	--	--	--	--	--	--	--	--
Cluster-1007.8713	440	--	--	--	--	--	--	--	--	--	--	--	--	--	--	--	--	--	--
Cluster-1007.8710	591	--	--	--	--	--	--	--	--	--	--	--	--	--	--	--	--	--	--
Cluster-1007.8711	628	--	--	KM892963.1	Haliotis fulgens microsatellite Hfulgens63 sequence	--	--	--	--	--	--	--	--	--	--	--	--	--	--
Cluster-1007.8716	251	--	--	--	--	--	--	--	--	--	--	--	--	--	--	--	--	--	--
Cluster-23068.0	435	--	--	--	--	--	--	--	--	--	--	--	--	--	--	--	--	--	--
Cluster-1007.8714	978	--	--	LC027329.1	Haliotis diversicolor genomic DNA, BAC clone: 003_rep_c701	--	--	--	--	--	--	--	--	--	--	--	--	--	--
Cluster-1007.8715	1828	--	--	LC027329.1	Haliotis diversicolor genomic DNA, BAC clone: 003_rep_c701	--	--	--	--	--	--	--	--	--	--	--	--	--	--
Cluster-1007.115997	5002	--	--	--	--	K16342	cytosolic phospholipase A2	P49147	Cytosolic phospholipase A2 OS=Gallus gallus OX=9031 GN=PLA2G4A PE=1 SV=1	PF01734//PF08782//PF01735//PF00168	Patatin-like phospholipase//c-SKI Smad4 binding domain//Lysophospholipase catalytic domain//C2 domain	GO:0006629//GO:0009395	lipid metabolic process//phospholipid catabolic process	GO:0004620//GO:0046332//GO:0005515	phospholipase activity//SMAD binding//protein binding	--	--	--	--
Cluster-1007.115996	2346	--	--	LC027358.1	Haliotis diversicolor genomic DNA, BAC clone: 009_rep_c2377	--	--	--	--	PF15247	Histone RNA hairpin-binding protein RNA-binding domain	--	--	GO:0003723	RNA binding	--	--	--	--
Cluster-1007.8718	384	--	--	LC027340.1	Haliotis diversicolor genomic DNA, BAC clone: 006_rep_c2412	--	--	--	--	--	--	--	--	--	--	--	--	--	--
Cluster-1007.8719	2693	--	--	LC027340.1	Haliotis diversicolor genomic DNA, BAC clone: 006_rep_c2412	--	--	--	--	--	--	--	--	--	--	--	--	--	--
Cluster-1007.115993	281	--	--	--	--	--	--	Q9W3W5	Protein shifted OS=Drosophila melanogaster OX=7227 GN=shf PE=1 SV=2	PF00008//PF00954//PF12131//PF07645	EGF-like domain//S-locus glycoprotein domain//Protein of unknown function (DUF3586)//Calcium-binding EGF domain	GO:0048544//GO:0006508	recognition of pollen//proteolysis	GO:0005515//GO:0004197//GO:0005509	protein binding//cysteine-type endopeptidase activity//calcium ion binding	--	--	--	--
Cluster-1007.115992	887	--	--	--	--	K02599	Notch	Q07008	Neurogenic locus notch homolog protein 1 OS=Rattus norvegicus OX=10116 GN=Notch1 PE=1 SV=3	PF00008	EGF-like domain	--	--	GO:0005515	protein binding	--	--	KOG1217	Fibrillins and related proteins containing Ca2+-binding EGF-like domains
Cluster-1007.115991	790	--	--	--	--	K02599	Notch	P07207	Neurogenic locus Notch protein OS=Drosophila melanogaster OX=7227 GN=N PE=1 SV=3	PF00008	EGF-like domain	--	--	GO:0005515	protein binding	--	--	KOG1217	Fibrillins and related proteins containing Ca2+-binding EGF-like domains
Cluster-1007.115990	298	--	--	--	--	--	--	Q9W3W5	Protein shifted OS=Drosophila melanogaster OX=7227 GN=shf PE=1 SV=2	PF07645//PF00954//PF00008	Calcium-binding EGF domain//S-locus glycoprotein domain//EGF-like domain	GO:0048544	recognition of pollen	GO:0005509//GO:0005515	calcium ion binding//protein binding	--	--	--	--
Cluster-1007.133511	588	--	--	HQ650377.1	Haliotis diversicolor clone Hdi456 microsatellite sequence	--	--	--	--	--	--	--	--	--	--	--	--	--	--
Cluster-19392.0	584	--	--	--	--	--	--	--	--	PF03150//PF01770	Di-haem cytochrome c peroxidase//Reduced folate carrier	GO:0055114//GO:0006810	oxidation-reduction process//transport	GO:0016491	oxidoreductase activity	GO:0016020	membrane	--	--
Cluster-32032.0	1672	--	--	--	--	--	--	--	--	PF08375//PF01153//PF11610	Proteasome regulatory subunit C-terminal//Glypican//Scaffold protein Ste5-Fus5 binding region	GO:0042176	regulation of protein catabolic process	GO:0043395//GO:0019900//GO:0030234	heparan sulfate proteoglycan binding//kinase binding//enzyme regulator activity	GO:0016020//GO:0005578//GO:0000502	membrane//proteinaceous extracellular matrix//proteasome complex	--	--
Cluster-1007.35176	696	--	--	--	--	--	--	--	--	PF12464	Maltose acetyltransferase	GO:0042967	acyl-carrier-protein biosynthetic process	GO:0016407	acetyltransferase activity	--	--	--	--
Cluster-1007.75440	1958	--	--	--	--	K05702	afadin	O35889	Afadin OS=Rattus norvegicus OX=10116 GN=Afdn PE=1 SV=1	PF00595//PF13180	PDZ domain (Also known as DHR or GLGF)//PDZ domain	--	--	GO:0005515	protein binding	--	--	KOG1892	Actin filament-binding protein Afadin
Cluster-1007.107455	365	--	--	--	--	--	--	--	--	PF02088	Ornatin	GO:0030193//GO:0007155	regulation of blood coagulation//cell adhesion	--	--	GO:0005576	extracellular region	--	--
Cluster-29225.0	649	--	--	--	--	--	--	Q9NRM2	Zinc finger protein 277 OS=Homo sapiens OX=9606 GN=ZNF277 PE=1 SV=2	--	--	--	--	--	--	--	--	--	--
Cluster-1007.117179	387	--	--	--	--	--	--	--	--	--	--	--	--	--	--	--	--	--	--
Cluster-1007.117178	844	--	--	--	--	--	--	--	--	--	--	--	--	--	--	--	--	--	--
Cluster-1007.117177	4107	--	--	--	--	--	--	Q9JLB4	Cubilin OS=Mus musculus OX=10090 GN=Cubn PE=1 SV=3	PF06682//PF16094	SOCE-associated regulatory factor of calcium homoeostasis//Proteasome assembly chaperone 4	GO:2001256//GO:0043248	regulation of store-operated calcium entry//proteasome assembly	--	--	GO:0005783//GO:0030176	endoplasmic reticulum//integral component of endoplasmic reticulum membrane	KOG4292	Cubilin, multiligand receptor mediating cobalamin absorption
Cluster-1007.117176	581	--	--	LC027304.1	Haliotis diversicolor genomic DNA, BAC clone: 002_c4	--	--	--	--	--	--	--	--	--	--	--	--	--	--
Cluster-1007.117175	1207	--	--	--	--	--	--	--	--	PF01459	Eukaryotic porin	GO:0055085	transmembrane transport	--	--	GO:0005741	mitochondrial outer membrane	--	--
Cluster-1007.117174	651	--	--	--	--	--	--	--	--	--	--	--	--	--	--	--	--	--	--
Cluster-1007.117173	2791	--	--	--	--	K11089	60 kDa SS-A/Ro ribonucleoprotein	P42700	60 kDa SS-A/Ro ribonucleoprotein OS=Xenopus laevis OX=8355 GN=trove2 PE=1 SV=1	PF05731	TROVE domain	--	--	GO:0003723	RNA binding	--	--	--	--
Cluster-1007.117172	1379	--	--	--	--	K11089	60 kDa SS-A/Ro ribonucleoprotein	O08848	60 kDa SS-A/Ro ribonucleoprotein OS=Mus musculus OX=10090 GN=Trove2 PE=1 SV=1	--	--	--	--	--	--	--	--	--	--
Cluster-1007.117171	1233	--	--	--	--	K11089	60 kDa SS-A/Ro ribonucleoprotein	O08848	60 kDa SS-A/Ro ribonucleoprotein OS=Mus musculus OX=10090 GN=Trove2 PE=1 SV=1	--	--	--	--	--	--	--	--	--	--
Cluster-1007.117170	1206	--	--	--	--	K11089	60 kDa SS-A/Ro ribonucleoprotein	O08848	60 kDa SS-A/Ro ribonucleoprotein OS=Mus musculus OX=10090 GN=Trove2 PE=1 SV=1	--	--	--	--	--	--	--	--	--	--
Cluster-1007.133510	2161	--	--	LC027342.1	Haliotis diversicolor genomic DNA, BAC clone: 006_rep_c2414	--	--	--	--	--	--	--	--	--	--	--	--	--	--
Cluster-42028.0	1199	--	--	--	--	--	--	--	--	--	--	--	--	--	--	--	--	--	--
Cluster-1339.0	760	--	--	KY529718.1	Malus domestica AT2G03780 mRNA, partial sequence	K02355	elongation factor G	I1K0K6	Elongation factor G-2, chloroplastic OS=Glycine max OX=3847 GN=fusA2 PE=3 SV=1	PF03144	Elongation factor Tu domain 2	--	--	GO:0005525	GTP binding	--	--	KOG0465	Mitochondrial elongation factor
Cluster-42028.1	523	--	--	--	--	--	--	--	--	--	--	--	--	--	--	--	--	--	--
Cluster-1007.25114	684	--	--	LC027336.1	Haliotis diversicolor genomic DNA, BAC clone: 005_rep_c27301	--	--	--	--	--	--	--	--	--	--	--	--	--	--
Cluster-1007.129273	698	--	--	LC027299.1	Haliotis diversicolor genomic DNA, BAC clone: 001_rep_c982	--	--	--	--	--	--	--	--	--	--	--	--	--	--
Cluster-6679.0	774	--	--	--	--	--	--	--	--	--	--	--	--	--	--	--	--	--	--
Cluster-46489.0	606	--	--	--	--	--	--	--	--	--	--	--	--	--	--	--	--	--	--
Cluster-427.0	526	--	--	--	--	--	--	--	--	--	--	--	--	--	--	--	--	--	--
Cluster-1007.120629	341	--	--	KT336367.1	Haliotis discus discus signal transducer and activator of transcription 5 (STAT5) gene, complete cds	--	--	--	--	--	--	--	--	--	--	--	--	--	--
Cluster-1007.120628	1476	--	--	--	--	--	--	O62169	Nematocin receptor 2 OS=Caenorhabditis elegans OX=6239 GN=ntr-2 PE=2 SV=1	PF00001	7 transmembrane receptor (rhodopsin family)	GO:0007186	G-protein coupled receptor signaling pathway	GO:0004930	G-protein coupled receptor activity	GO:0016021	integral component of membrane	--	--
Cluster-1007.84489	1891	--	--	--	--	K02263	cytochrome c oxidase subunit 4	P80971	Cytochrome c oxidase subunit 4 isoform 2, mitochondrial OS=Thunnus obesus OX=8241 PE=1 SV=2	PF02936	Cytochrome c oxidase subunit IV	GO:0015992//GO:0006123	proton transport//mitochondrial electron transport, cytochrome c to oxygen	GO:0004129	cytochrome-c oxidase activity	GO:0045277	respiratory chain complex IV	KOG4075	Cytochrome c oxidase, subunit IV/COX5b
Cluster-1007.84488	2363	--	--	LC027326.1	Haliotis diversicolor genomic DNA, BAC clone: 003_rep_c698	--	--	--	--	--	--	--	--	--	--	--	--	--	--
Cluster-1007.84487	1304	--	--	--	--	--	--	--	--	--	--	--	--	--	--	--	--	--	--
Cluster-1007.84486	5755	--	--	--	--	--	--	Q5T200	Zinc finger CCCH domain-containing protein 13 OS=Homo sapiens OX=9606 GN=ZC3H13 PE=1 SV=1	PF07359//PF00642	Liver-expressed antimicrobial peptide 2 precursor (LEAP-2)//Zinc finger C-x8-C-x5-C-x3-H type (and similar)	GO:0042742	defense response to bacterium	GO:0046872	metal ion binding	--	--	--	--
Cluster-1007.84485	336	--	--	--	--	--	--	--	--	--	--	--	--	--	--	--	--	--	--
Cluster-1007.84484	291	--	--	LC027358.1	Haliotis diversicolor genomic DNA, BAC clone: 009_rep_c2377	--	--	--	--	--	--	--	--	--	--	--	--	--	--
Cluster-1007.84483	662	--	--	--	--	--	--	--	--	--	--	--	--	--	--	--	--	--	--
Cluster-1007.84482	263	--	--	--	--	--	--	--	--	--	--	--	--	--	--	--	--	--	--
Cluster-1007.84481	705	--	--	--	--	--	--	--	--	PF01858	Retinoblastoma-associated protein A domain	GO:0051726	regulation of cell cycle	--	--	GO:0005634	nucleus	--	--
Cluster-1007.84480	1400	--	--	--	--	--	--	--	--	--	--	--	--	--	--	--	--	--	--
Cluster-1007.79429	478	--	--	--	--	--	--	--	--	PF00643//PF05791//PF00081//PF03092	B-box zinc finger//Bacillus haemolytic enterotoxin (HBL)//Iron/manganese superoxide dismutases, alpha-hairpin domain//BT1 family	GO:0055114//GO:0009405//GO:0006810//GO:0006801	oxidation-reduction process//pathogenesis//transport//superoxide metabolic process	GO:0004784//GO:0046872//GO:0008270	superoxide dismutase activity//metal ion binding//zinc ion binding	GO:0016020//GO:0005622//GO:0016021	membrane//intracellular//integral component of membrane	--	--
Cluster-1007.79428	322	--	--	--	--	--	--	--	--	PF00643	B-box zinc finger	--	--	GO:0008270	zinc ion binding	GO:0005622	intracellular	--	--
Cluster-15979.0	736	--	--	--	--	K01446	N-acetylmuramoyl-L-alanine amidase	C0HK98	Peptidoglycan-recognition protein SC1a OS=Drosophila melanogaster OX=7227 GN=PGRP-SC1a PE=3 SV=1	PF09117	MiAMP1	GO:0006952//GO:0045926	defense response//negative regulation of growth	--	--	--	--	--	--
Cluster-1007.79421	5799	--	--	XM_013542113.1	PREDICTED: Lingula anatina exocyst complex component 1 (LOC106164258), transcript variant X3, mRNA	--	--	Q8R3S6	Exocyst complex component 1 OS=Mus musculus OX=10090 GN=Exoc1 PE=1 SV=4	PF03445//PF08769//PF04947	Putative nucleotidyltransferase DUF294//Sporulation initiation factor Spo0A C terminal//Poxvirus Late Transcription Factor VLTF3 like	GO:0006355//GO:0042173//GO:0046782	regulation of transcription, DNA-templated//regulation of sporulation resulting in formation of a cellular spore//regulation of viral transcription	GO:0003700//GO:0005509//GO:0008773	transcription factor activity, sequence-specific DNA binding//calcium ion binding//[protein-PII] uridylyltransferase activity	GO:0005667//GO:0005737	transcription factor complex//cytoplasm	KOG2148	Exocyst protein Sec3
Cluster-1007.79420	5530	--	--	XM_013080934.1	PREDICTED: Aplysia californica serine/arginine repetitive matrix protein 2-like (LOC101862791), mRNA	--	--	Q9R1Z8	Vinexin OS=Mus musculus OX=10090 GN=Sorbs3 PE=1 SV=1	PF16839//PF04014//PF14604//PF02964//PF00018	Nematode antimicrobial peptide//Antidote-toxin recognition MazE, bacterial antitoxin//Variant SH3 domain//Methane monooxygenase, hydrolase gamma chain//SH3 domain	GO:0015947//GO:0006118//GO:0098542	methane metabolic process//obsolete electron transport//defense response to other organism	GO:0015049//GO:0005515//GO:0003677	methane monooxygenase activity//protein binding//DNA binding	GO:0015050	methane monooxygenase complex	KOG4225	Sorbin and SH3 domain-containing protein
Cluster-1007.79423	254	--	--	--	--	--	--	--	--	PF00643	B-box zinc finger	--	--	GO:0008270	zinc ion binding	GO:0005622	intracellular	--	--
Cluster-1007.79422	1901	--	--	XM_013542113.1	PREDICTED: Lingula anatina exocyst complex component 1 (LOC106164258), transcript variant X3, mRNA	--	--	Q8R3S6	Exocyst complex component 1 OS=Mus musculus OX=10090 GN=Exoc1 PE=1 SV=4	--	--	--	--	--	--	--	--	KOG2148	Exocyst protein Sec3
Cluster-1007.79425	394	--	--	--	--	--	--	--	--	PF05791//PF09728//PF00643//PF00755	Bacillus haemolytic enterotoxin (HBL)//Myosin-like coiled-coil protein//B-box zinc finger//Choline/Carnitine o-acyltransferase	GO:0009405	pathogenesis	GO:0019905//GO:0016746//GO:0008270	syntaxin binding//transferase activity, transferring acyl groups//zinc ion binding	GO:0016020//GO:0005622	membrane//intracellular	--	--
Cluster-1007.79424	346	--	--	--	--	--	--	--	--	--	--	--	--	--	--	--	--	--	--
Cluster-1007.79427	217	--	--	--	--	--	--	--	--	PF00643//PF02106	B-box zinc finger//Fanconi anaemia group C protein	GO:0006281	DNA repair	GO:0008270	zinc ion binding	GO:0005622	intracellular	--	--
Cluster-1007.79426	930	--	--	--	--	--	--	--	--	PF05405//PF00643	Mitochondrial ATP synthase B chain precursor (ATP-synt_B)//B-box zinc finger	GO:0015986//GO:0015992	ATP synthesis coupled proton transport//proton transport	GO:0015078//GO:0008270	hydrogen ion transmembrane transporter activity//zinc ion binding	GO:0005622	intracellular	--	--
Cluster-24218.0	542	--	--	--	--	--	--	--	--	--	--	--	--	--	--	--	--	--	--
Cluster-33039.0	1424	--	--	--	--	K15109	solute carrier family 25 (mitochondrial carnitine/acylcarnitine transporter), member 20/29	Q9Z2Z6	Mitochondrial carnitine/acylcarnitine carrier protein OS=Mus musculus OX=10090 GN=Slc25a20 PE=1 SV=1	PF08992	Quinohemoprotein amine dehydrogenase, gamma subunit	GO:0055114	oxidation-reduction process	GO:0016638	oxidoreductase activity, acting on the CH-NH2 group of donors	--	--	KOG0758	Mitochondrial carnitine-acylcarnitine carrier protein
Cluster-1007.25118	1589	--	--	JQ906782.1	Haliotis diversicolor hypothetical protein gene, complete cds	--	--	--	--	PF15489	CST, telomere maintenance, complex subunit CTC1	--	--	GO:0003697	single-stranded DNA binding	--	--	--	--
Cluster-28239.0	822	--	--	--	--	--	--	--	--	--	--	--	--	--	--	--	--	--	--
Cluster-1007.25119	479	--	--	--	--	--	--	--	--	--	--	--	--	--	--	--	--	--	--
Cluster-901.0	1043	--	--	--	--	--	--	--	--	--	--	--	--	--	--	--	--	--	--
Cluster-13550.0	587	--	--	--	--	--	--	--	--	--	--	--	--	--	--	--	--	--	--
Cluster-41350.0	1265	--	--	--	--	--	--	--	--	PF13631	Cytochrome b(N-terminal)/b6/petB	GO:0006118	obsolete electron transport	GO:0016491//GO:0009055	oxidoreductase activity//electron carrier activity	GO:0016020	membrane	--	--
Cluster-16302.0	403	--	--	--	--	--	--	--	--	--	--	--	--	--	--	--	--	--	--
Cluster-1007.103749	259	--	--	--	--	--	--	--	--	--	--	--	--	--	--	--	--	--	--
Cluster-15784.1	230	--	--	--	--	--	--	--	--	--	--	--	--	--	--	--	--	--	--
Cluster-15784.0	322	--	--	--	--	--	--	--	--	PF01213//PF05038//PF02166	Adenylate cyclase associated (CAP) N terminal//Cytochrome Cytochrome b558 alpha-subunit//Androgen receptor	GO:0030521//GO:0006355//GO:0007010//GO:0007165	androgen receptor signaling pathway//regulation of transcription, DNA-templated//cytoskeleton organization//signal transduction	GO:0020037//GO:0005496//GO:0004882//GO:0003779//GO:0003677	heme binding//steroid binding//androgen receptor activity//actin binding//DNA binding	GO:0005634	nucleus	--	--
Cluster-1007.76117	587	--	--	HM359008.1	Antheraea pernyi internal transcribed spacer 1, 5.8S ribosomal RNA gene, internal transcribed spacer 2, and 28S ribosomal RNA gene, complete sequence	--	--	Q8TGM7	Putative uncharacterized protein ART2 OS=Saccharomyces cerevisiae (strain ATCC 204508 / S288c) OX=559292 GN=ART2 PE=5 SV=1	--	--	--	--	--	--	--	--	--	--
Cluster-1007.129277	1016	--	--	--	--	--	--	--	--	PF05699	hAT family C-terminal dimerisation region	--	--	GO:0046983	protein dimerization activity	--	--	--	--
Cluster-15003.0	345	--	--	LC027358.1	Haliotis diversicolor genomic DNA, BAC clone: 009_rep_c2377	--	--	--	--	--	--	--	--	--	--	--	--	--	--
Cluster-34037.0	710	--	--	--	--	--	--	--	--	PF01299//PF14991//PF05038//PF11857//PF01213	Lysosome-associated membrane glycoprotein (Lamp)//Protein melan-A//Cytochrome Cytochrome b558 alpha-subunit//Domain of unknown function (DUF3377)//Adenylate cyclase associated (CAP) N terminal	GO:0007010	cytoskeleton organization	GO:0004222//GO:0003779//GO:0020037	metalloendopeptidase activity//actin binding//heme binding	GO:0016020//GO:0042470	membrane//melanosome	--	--
Cluster-10167.0	962	--	--	--	--	--	--	--	--	--	--	--	--	--	--	--	--	--	--
Cluster-13024.0	468	--	--	--	--	--	--	--	--	--	--	--	--	--	--	--	--	--	--
Cluster-1007.27709	957	--	--	--	--	--	--	--	--	--	--	--	--	--	--	--	--	--	--
Cluster-1007.27708	621	--	--	--	--	--	--	--	--	--	--	--	--	--	--	--	--	--	--
Cluster-16467.0	540	--	--	--	--	--	--	--	--	--	--	--	--	--	--	--	--	--	--
Cluster-8543.0	897	--	--	XM_009380911.2	PREDICTED: Pyrus x bretschneideri NEDD8-conjugating enzyme Ubc12 (LOC103967636), transcript variant X1, mRNA	K10579	ubiquitin-conjugating enzyme E2 M	Q9SDY5	NEDD8-conjugating enzyme Ubc12 OS=Arabidopsis thaliana OX=3702 GN=RCE1 PE=1 SV=1	PF05773//PF05743	RWD domain//UEV domain	GO:0015031//GO:0006464	protein transport//cellular protein modification process	GO:0005515	protein binding	--	--	KOG0420	Ubiquitin-protein ligase
Cluster-4949.0	633	--	--	--	--	--	--	--	--	--	--	--	--	--	--	--	--	--	--
Cluster-47368.0	1251	--	--	LC027342.1	Haliotis diversicolor genomic DNA, BAC clone: 006_rep_c2414	--	--	--	--	--	--	--	--	--	--	--	--	--	--
Cluster-39813.0	905	--	--	--	--	--	--	--	--	--	--	--	--	--	--	--	--	--	--
Cluster-43627.2	321	--	--	--	--	--	--	--	--	PF00953	Glycosyl transferase family 4	GO:0006629//GO:0009252	lipid metabolic process//peptidoglycan biosynthetic process	GO:0008963	phospho-N-acetylmuramoyl-pentapeptide-transferase activity	GO:0016021	integral component of membrane	--	--
Cluster-44179.0	1730	--	--	--	--	--	--	--	--	PF00957//PF00001//PF08114	Synaptobrevin//7 transmembrane receptor (rhodopsin family)//ATPase proteolipid family	GO:0007186//GO:0050790//GO:0016192	G-protein coupled receptor signaling pathway//regulation of catalytic activity//vesicle-mediated transport	GO:0004930//GO:0030234	G-protein coupled receptor activity//enzyme regulator activity	GO:0016021	integral component of membrane	--	--
Cluster-31886.0	1918	--	--	--	--	--	--	--	--	PF10473//PF00589	Leucine-rich repeats of kinetochore protein Cenp-F/LEK1//Phage integrase family	GO:0015074//GO:0006310	DNA integration//DNA recombination	GO:0008134//GO:0042803//GO:0045502//GO:0003677	transcription factor binding//protein homodimerization activity//dynein binding//DNA binding	GO:0030286//GO:0005667	dynein complex//transcription factor complex	--	--
Cluster-1007.27702	821	--	--	--	--	--	--	--	--	--	--	--	--	--	--	--	--	--	--
Cluster-1007.129279	422	--	--	LC027358.1	Haliotis diversicolor genomic DNA, BAC clone: 009_rep_c2377	--	--	--	--	PF12906	RING-variant domain	--	--	GO:0008270	zinc ion binding	--	--	--	--
Cluster-1007.27701	373	--	--	--	--	--	--	--	--	--	--	--	--	--	--	--	--	--	--
Cluster-1007.18767	589	--	--	XM_008382323.2	PREDICTED: Malus x domestica elongation factor 1-alpha (LOC103443464), mRNA	K03231	elongation factor 1-alpha	Q03033	Elongation factor 1-alpha OS=Triticum aestivum OX=4565 GN=TEF1 PE=2 SV=1	PF02662//PF01926	Methyl-viologen-reducing hydrogenase, delta subunit//50S ribosome-binding GTPase	GO:0015948//GO:0055114//GO:0006184//GO:0006414//GO:0006448	methanogenesis//oxidation-reduction process//obsolete GTP catabolic process//translational elongation//regulation of translational elongation	GO:0003746//GO:0005525//GO:0003924	translation elongation factor activity//GTP binding//GTPase activity	GO:0005840//GO:0005737	ribosome//cytoplasm	KOG0052	Translation elongation factor EF-1 alpha/Tu
Cluster-1007.23826	361	--	--	EF103445.1	Haliotis discus discus cholinesterase 1 mRNA, partial cds	K01050	cholinesterase	Q64176	Carboxylesterase 1E OS=Mus musculus OX=10090 GN=Ces1e PE=1 SV=1	--	--	--	--	--	--	--	--	KOG1516	Carboxylesterase and related proteins
Cluster-1007.23827	255	--	--	--	--	--	--	--	--	--	--	--	--	--	--	--	--	--	--
Cluster-1007.23824	304	--	--	EF103445.1	Haliotis discus discus cholinesterase 1 mRNA, partial cds	K01049	acetylcholinesterase	Q95000	Cholinesterase 1 (Fragment) OS=Branchiostoma lanceolatum OX=7740 GN=CHE1 PE=3 SV=1	PF07859	alpha/beta hydrolase fold	GO:0008152	metabolic process	GO:0016787	hydrolase activity	--	--	--	--
Cluster-1007.23825	788	--	--	EF103445.1	Haliotis discus discus cholinesterase 1 mRNA, partial cds	K01050	cholinesterase	P21927	Cholinesterase OS=Oryctolagus cuniculus OX=9986 GN=BCHE PE=2 SV=1	--	--	--	--	--	--	--	--	KOG4389	Acetylcholinesterase/Butyrylcholinesterase
Cluster-1007.23822	3522	--	--	XM_016975889.1	PREDICTED: Cricetulus griseus protein kinase AMP-activated catalytic subunit alpha 2 (Prkaa2), transcript variant X1, mRNA	K07198	5'-AMP-activated protein kinase, catalytic alpha subunit	Q09137	5'-AMP-activated protein kinase catalytic subunit alpha-2 OS=Rattus norvegicus OX=10116 GN=Prkaa2 PE=1 SV=1	PF07714//PF00069//PF06293	Protein tyrosine kinase//Protein kinase domain//Lipopolysaccharide kinase (Kdo/WaaP) family	GO:0006468	protein phosphorylation	GO:0004672//GO:0016773//GO:0005524	protein kinase activity//phosphotransferase activity, alcohol group as acceptor//ATP binding	GO:0016020	membrane	KOG0583	Serine/threonine protein kinase
Cluster-1007.23823	1883	--	--	EF103445.1	Haliotis discus discus cholinesterase 1 mRNA, partial cds	K01050	cholinesterase	P04058	Acetylcholinesterase OS=Tetronarce californica OX=7787 GN=ache PE=1 SV=2	PF08184//PF00326//PF07859	Cuticle protein 7 isoform family//Prolyl oligopeptidase family//alpha/beta hydrolase fold	GO:0008152//GO:0006508	metabolic process//proteolysis	GO:0008236//GO:0016787//GO:0042302	serine-type peptidase activity//hydrolase activity//structural constituent of cuticle	--	--	KOG4389	Acetylcholinesterase/Butyrylcholinesterase
Cluster-1007.23820	3001	--	--	LC027297.1	Haliotis diversicolor genomic DNA, BAC clone: 001_rep_c980	--	--	--	--	--	--	--	--	--	--	--	--	--	--
Cluster-1007.23821	542	--	--	--	--	K00106	xanthine dehydrogenase/oxidase	P10351	Xanthine dehydrogenase OS=Drosophila melanogaster OX=7227 GN=ry PE=2 SV=2	PF00111//PF01799//PF13085	2Fe-2S iron-sulfur cluster binding domain//[2Fe-2S] binding domain//2Fe-2S iron-sulfur cluster binding domain	GO:0055114//GO:0006118	oxidation-reduction process//obsolete electron transport	GO:0046872//GO:0016491//GO:0009055//GO:0051536	metal ion binding//oxidoreductase activity//electron carrier activity//iron-sulfur cluster binding	--	--	KOG0430	Xanthine dehydrogenase
Cluster-1007.23828	393	--	--	--	--	--	--	--	--	--	--	--	--	--	--	--	--	--	--
Cluster-1007.23829	3516	--	--	--	--	--	--	O88398	Advillin OS=Mus musculus OX=10090 GN=Avil PE=1 SV=2	PF02209	Villin headpiece domain	GO:0007010	cytoskeleton organization	GO:0003779	actin binding	--	--	KOG0443	Actin regulatory proteins (gelsolin/villin family)
Cluster-1007.103657	963	--	--	HQ650445.1	Haliotis diversicolor clone Hdi3-168 microsatellite sequence	--	--	--	--	--	--	--	--	--	--	--	--	--	--
Cluster-1007.103656	405	--	--	LC027359.1	Haliotis diversicolor genomic DNA, BAC clone: 009_rep_c2378	--	--	--	--	--	--	--	--	--	--	--	--	--	--
Cluster-1007.103655	1085	--	--	--	--	--	--	--	--	PF02165	Wilm's tumour protein	GO:0006355	regulation of transcription, DNA-templated	--	--	GO:0005634	nucleus	--	--
Cluster-1007.127106	245	--	--	JQ653304.1	Haliotis discus discus cystatin B gene, complete cds	--	--	--	--	--	--	--	--	--	--	--	--	--	--
Cluster-1007.127101	1263	--	--	KU096999.1	Abalone herpesvirus Taiwan/2005, complete genome	--	--	Q6R7C1	Uncharacterized protein ORF109 OS=Ostreid herpesvirus 1 (isolate France) OX=654903 GN=ORF109 PE=4 SV=1	--	--	--	--	--	--	--	--	--	--
Cluster-1007.127100	1269	--	--	LC027359.1	Haliotis diversicolor genomic DNA, BAC clone: 009_rep_c2378	--	--	--	--	PF10266	Hereditary spastic paraplegia protein strumpellin	--	--	--	--	GO:0071203	WASH complex	--	--
Cluster-1007.103651	1914	--	--	FJ607739.1	Haliotis diversicolor microsatellite HUHD57 sequence	--	--	--	--	--	--	--	--	--	--	--	--	--	--
Cluster-1007.127102	2807	--	--	--	--	--	--	P36941	Tumor necrosis factor receptor superfamily member 3 OS=Homo sapiens OX=9606 GN=LTBR PE=1 SV=1	PF00020	TNFR/NGFR cysteine-rich region	--	--	GO:0005515	protein binding	--	--	--	--
Cluster-1007.64957	7133	--	--	XM_011441620.2	PREDICTED: Crassostrea gigas pre-mRNA-processing factor 17 (LOC105337060), mRNA	K12816	pre-mRNA-processing factor 17	O60508	Pre-mRNA-processing factor 17 OS=Homo sapiens OX=9606 GN=CDC40 PE=1 SV=1	PF00400//PF00287	WD domain, G-beta repeat//Sodium / potassium ATPase beta chain	GO:0006814//GO:0006813	sodium ion transport//potassium ion transport	GO:0005515	protein binding	GO:0005890	sodium:potassium-exchanging ATPase complex	KOG0282	mRNA splicing factor
Cluster-14580.0	696	--	--	--	--	--	--	--	--	--	--	--	--	--	--	--	--	--	--
Cluster-1007.64955	646	--	--	--	--	K03946	NADH dehydrogenase (ubiquinone) 1 alpha subcomplex subunit 2	O43678	NADH dehydrogenase [ubiquinone] 1 alpha subcomplex subunit 2 OS=Homo sapiens OX=9606 GN=NDUFA2 PE=1 SV=3	--	--	--	--	--	--	--	--	KOG3446	NADH:ubiquinone oxidoreductase NDUFA2/B8 subunit
Cluster-1007.64954	672	--	--	--	--	--	--	--	--	--	--	--	--	--	--	--	--	--	--
Cluster-1007.127109	573	--	--	XM_024013492.1	PREDICTED: Salvelinus alpinus dynein light chain 4, axonemal (LOC111981980), mRNA	--	--	Q32KN5	Dynein light chain 4, axonemal OS=Bos taurus OX=9913 GN=DNAL4 PE=3 SV=1	--	--	--	--	--	--	--	--	--	--
Cluster-1007.127108	1075	--	--	LC027332.1	Haliotis diversicolor genomic DNA, BAC clone: 004_rep_c861	--	--	--	--	--	--	--	--	--	--	--	--	--	--
Cluster-1007.103659	2636	--	--	CT032472.1	Platynereis dumerilii EST IB0AAA37CE11FM1	K11650	SWI/SNF-related matrix-associated actin-dependent regulator of chromatin subfamily D	Q61466	SWI/SNF-related matrix-associated actin-dependent regulator of chromatin subfamily D member 1 OS=Mus musculus OX=10090 GN=Smarcd1 PE=1 SV=3	PF00523	Fusion glycoprotein F0	GO:0006948	induction by virus of host cell-cell fusion	--	--	--	--	KOG2570	SWI/SNF transcription activation complex subunit
Cluster-1007.64950	1134	--	--	--	--	--	--	--	--	PF13895	Immunoglobulin domain	--	--	GO:0005515	protein binding	--	--	--	--
Cluster-20271.0	922	--	--	--	--	--	--	--	--	--	--	--	--	--	--	--	--	--	--
Cluster-47157.0	507	--	--	--	--	--	--	--	--	--	--	--	--	--	--	--	--	--	--
Cluster-15819.0	981	--	--	--	--	--	--	Q8BML2	O-acyltransferase like protein OS=Mus musculus OX=10090 GN=Oacyl PE=2 SV=1	PF10591//PF13405//PF13499//PF13202//PF00036//PF13833	Secreted protein acidic and rich in cysteine Ca binding region//EF-hand domain//EF-hand domain pair//EF hand//EF hand//EF-hand domain pair	GO:0007165	signal transduction	GO:0005509	calcium ion binding	GO:0005578	proteinaceous extracellular matrix	--	--
Cluster-45371.0	1262	--	--	--	--	--	--	--	--	--	--	--	--	--	--	--	--	--	--
Cluster-1007.74886	234	--	--	LC027332.1	Haliotis diversicolor genomic DNA, BAC clone: 004_rep_c861	--	--	--	--	--	--	--	--	--	--	--	--	--	--
Cluster-1007.74887	1384	--	--	--	--	--	--	--	--	PF12567//PF04545	Leukocyte receptor CD45//Sigma-70, region 4	GO:0006470//GO:0006355//GO:0006570//GO:0006352//GO:0050852	protein dephosphorylation//regulation of transcription, DNA-templated//tyrosine metabolic process//DNA-templated transcription, initiation//T cell receptor signaling pathway	GO:0004725//GO:0016987//GO:0003700//GO:0003677	protein tyrosine phosphatase activity//sigma factor activity//transcription factor activity, sequence-specific DNA binding//DNA binding	GO:0005667	transcription factor complex	--	--
Cluster-21532.0	576	--	--	--	--	--	--	--	--	--	--	--	--	--	--	--	--	--	--
Cluster-28424.0	2326	--	--	KP276366.1	Hahniidae sp. ARP-2015 isolate AR22 large subunit ribosomal RNA gene, partial sequence	--	--	P59034	Leucine-rich repeat-containing protein 3 OS=Mus musculus OX=10090 GN=Lrrc3 PE=1 SV=1	PF00560//PF13855	Leucine Rich Repeat//Leucine rich repeat	--	--	GO:0005515	protein binding	--	--	--	--
Cluster-1007.18765	1032	--	--	XM_008387060.2	PREDICTED: Malus x domestica elongation factor 1-alpha (LOC103447856), mRNA	K03231	elongation factor 1-alpha	Q41803	Elongation factor 1-alpha OS=Zea mays OX=4577 GN=EF1A PE=3 SV=1	PF03144//PF02662//PF01926	Elongation factor Tu domain 2//Methyl-viologen-reducing hydrogenase, delta subunit//50S ribosome-binding GTPase	GO:0055114//GO:0015948	oxidation-reduction process//methanogenesis	GO:0005525	GTP binding	--	--	KOG0052	Translation elongation factor EF-1 alpha/Tu
Cluster-39852.0	2492	--	--	LC027340.1	Haliotis diversicolor genomic DNA, BAC clone: 006_rep_c2412	--	--	--	--	PF05393	Human adenovirus early E3A glycoprotein	--	--	--	--	GO:0016021	integral component of membrane	--	--
Cluster-7998.0	1095	--	--	XM_008349771.2	PREDICTED: Malus x domestica glycerophosphodiester phosphodiesterase GDPD1, chloroplastic-like (LOC103411114), mRNA	--	--	Q9SGA2	Glycerophosphodiester phosphodiesterase GDPD1, chloroplastic OS=Arabidopsis thaliana OX=3702 GN=GDPD1 PE=1 SV=1	PF03009	Glycerophosphoryl diester phosphodiesterase family	GO:0006629	lipid metabolic process	GO:0008081	phosphoric diester hydrolase activity	--	--	KOG2421	Predicted starch-binding protein
Cluster-1007.122082	1775	--	--	--	--	--	--	Q6ZFT5	Ribose-phosphate pyrophosphokinase 4 OS=Oryza sativa subsp. japonica OX=39947 GN=Os02g0714600 PE=2 SV=1	PF14572//PF00156//PF02226	Phosphoribosyl synthetase-associated domain//Phosphoribosyl transferase domain//Picornavirus coat protein (VP4)	GO:0009165//GO:0006098//GO:0009116//GO:0006144	nucleotide biosynthetic process//pentose-phosphate shunt//nucleoside metabolic process//purine nucleobase metabolic process	GO:0004749//GO:0000287//GO:0005198	ribose phosphate diphosphokinase activity//magnesium ion binding//structural molecule activity	GO:0019028	viral capsid	--	--
Cluster-1007.122081	492	--	--	LC027358.1	Haliotis diversicolor genomic DNA, BAC clone: 009_rep_c2377	--	--	--	--	--	--	--	--	--	--	--	--	--	--
Cluster-1007.122080	2223	--	--	--	--	--	--	Q6ZFT5	Ribose-phosphate pyrophosphokinase 4 OS=Oryza sativa subsp. japonica OX=39947 GN=Os02g0714600 PE=2 SV=1	PF02226//PF00156//PF14572	Picornavirus coat protein (VP4)//Phosphoribosyl transferase domain//Phosphoribosyl synthetase-associated domain	GO:0009116//GO:0006098//GO:0009165//GO:0006144	nucleoside metabolic process//pentose-phosphate shunt//nucleotide biosynthetic process//purine nucleobase metabolic process	GO:0004749//GO:0005198//GO:0000287	ribose phosphate diphosphokinase activity//structural molecule activity//magnesium ion binding	GO:0019028	viral capsid	--	--
Cluster-1007.122087	3730	--	--	LC027339.1	Haliotis diversicolor genomic DNA, BAC clone: 006_rep_c2411	--	--	Q6TXF1	Arrestin domain-containing protein 3 OS=Rattus norvegicus OX=10116 GN=Arrdc3 PE=2 SV=1	PF08089	Huwentoxin-II family	GO:0009405	pathogenesis	--	--	GO:0005576	extracellular region	KOG3780	Thioredoxin binding protein TBP-2/VDUP1
Cluster-1007.122086	1989	--	--	LC027339.1	Haliotis diversicolor genomic DNA, BAC clone: 006_rep_c2411	--	--	--	--	--	--	--	--	--	--	--	--	--	--
Cluster-1007.122085	278	--	--	--	--	--	--	--	--	--	--	--	--	--	--	--	--	--	--
Cluster-1007.109702	264	--	--	--	--	--	--	--	--	--	--	--	--	--	--	--	--	--	--
Cluster-1007.71890	6864	--	--	--	--	--	--	--	--	PF03219	TLC ATP/ADP transporter	GO:0006810	transport	GO:0005524//GO:0005471	ATP binding//ATP:ADP antiporter activity	GO:0016021	integral component of membrane	--	--
Cluster-1007.71891	990	--	--	--	--	--	--	--	--	--	--	--	--	--	--	--	--	--	--
Cluster-1007.71892	2089	--	--	XM_020066003.1	PREDICTED: Crassostrea gigas tektin-2 (LOC105325415), mRNA	K18629	tektin-2	Q9UIF3	Tektin-2 OS=Homo sapiens OX=9606 GN=TEKT2 PE=1 SV=1	PF02454//PF07195	Sigma 1s protein//Flagellar hook-associated protein 2 C-terminus	GO:0019048//GO:0007155	modulation by virus of host morphology or physiology//cell adhesion	--	--	GO:0009288	bacterial-type flagellum	KOG2685	Cystoskeletal protein Tektin
Cluster-1007.122088	411	--	--	LC027358.1	Haliotis diversicolor genomic DNA, BAC clone: 009_rep_c2377	--	--	--	--	--	--	--	--	--	--	--	--	--	--
Cluster-1007.71894	1964	--	--	--	--	K14457	2-acylglycerol O-acyltransferase 2	Q3SYC2	2-acylglycerol O-acyltransferase 2 OS=Homo sapiens OX=9606 GN=MOGAT2 PE=1 SV=2	PF03982	Diacylglycerol acyltransferase	--	--	GO:0016747	transferase activity, transferring acyl groups other than amino-acyl groups	--	--	KOG0831	Acyl-CoA:diacylglycerol acyltransferase (DGAT)
Cluster-1007.109701	201	--	--	--	--	--	--	--	--	--	--	--	--	--	--	--	--	--	--
Cluster-1007.71896	492	--	--	--	--	--	--	--	--	--	--	--	--	--	--	--	--	--	--
Cluster-1007.71897	1216	--	--	--	--	--	--	--	--	--	--	--	--	--	--	--	--	--	--
Cluster-11727.0	769	--	--	--	--	--	--	--	--	--	--	--	--	--	--	--	--	--	--
Cluster-1007.138776	402	--	--	KU096999.1	Abalone herpesvirus Taiwan/2005, complete genome	--	--	--	--	--	--	--	--	--	--	--	--	--	--
Cluster-1007.109700	970	--	--	GU995388.1	Haliotis discus hannai clone CH1212 microsatellite sequence	--	--	--	--	--	--	--	--	--	--	--	--	--	--
Cluster-1007.138777	934	--	--	LC027296.1	Haliotis diversicolor genomic DNA, BAC clone: 001_rep_c979	--	--	--	--	--	--	--	--	--	--	--	--	--	--
Cluster-1007.109707	408	--	--	--	--	--	--	--	--	--	--	--	--	--	--	--	--	--	--
Cluster-1007.138774	974	--	--	--	--	--	--	--	--	--	--	--	--	--	--	--	--	--	--
Cluster-1007.132362	1428	--	--	--	--	--	--	--	--	PF00010	Helix-loop-helix DNA-binding domain	--	--	GO:0046983	protein dimerization activity	--	--	--	--
Cluster-1007.146060	227	--	--	--	--	--	--	--	--	--	--	--	--	--	--	--	--	--	--
Cluster-1007.132361	335	--	--	--	--	--	--	O18993	Cytochrome P450 3A21 OS=Callithrix jacchus OX=9483 GN=CYP3A21 PE=2 SV=1	PF00067	Cytochrome P450	GO:0055114	oxidation-reduction process	GO:0005506//GO:0020037//GO:0016705	iron ion binding//heme binding//oxidoreductase activity, acting on paired donors, with incorporation or reduction of molecular oxygen	--	--	--	--
Cluster-1007.74888	1025	--	--	LC027332.1	Haliotis diversicolor genomic DNA, BAC clone: 004_rep_c861	--	--	--	--	--	--	--	--	--	--	--	--	--	--
Cluster-1007.109704	433	--	--	--	--	--	--	--	--	--	--	--	--	--	--	--	--	--	--
Cluster-13738.0	587	--	--	LC027298.1	Haliotis diversicolor genomic DNA, BAC clone: 001_rep_c981	--	--	--	--	--	--	--	--	--	--	--	--	--	--
Cluster-1007.146066	280	--	--	--	--	--	--	--	--	--	--	--	--	--	--	--	--	--	--
Cluster-26771.0	863	--	--	--	--	K06233	low density lipoprotein-related protein 2	P35951	Low-density lipoprotein receptor OS=Mus musculus OX=10090 GN=Ldlr PE=1 SV=2	PF00057	Low-density lipoprotein receptor domain class A	--	--	GO:0005515	protein binding	--	--	KOG1215	Low-density lipoprotein receptors containing Ca2+-binding EGF-like domains
Cluster-1007.5669	1329	--	--	--	--	--	--	Q86VH4	Leucine-rich repeat transmembrane neuronal protein 4 OS=Homo sapiens OX=9606 GN=LRRTM4 PE=2 SV=2	PF00560//PF13855	Leucine Rich Repeat//Leucine rich repeat	--	--	GO:0005515	protein binding	--	--	KOG0619	FOG: Leucine rich repeat
Cluster-1007.5668	1244	--	--	--	--	--	--	--	--	PF01708//PF00728	Geminivirus putative movement protein//Glycosyl hydrolase family 20, catalytic domain	GO:0046740//GO:0005975	transport of virus in host, cell to cell//carbohydrate metabolic process	GO:0004553	hydrolase activity, hydrolyzing O-glycosyl compounds	GO:0016021	integral component of membrane	--	--
Cluster-1007.5665	4321	--	--	--	--	--	--	O43822	Protein C21orf2 OS=Homo sapiens OX=9606 GN=C21orf2 PE=1 SV=1	PF10104//PF03343//PF02140//PF13516//PF13855	Di-sulfide bridge nucleocytoplasmic transport domain//SART-1 family//Galactose binding lectin domain//Leucine Rich repeat//Leucine rich repeat	GO:0006611//GO:0006406//GO:0000398//GO:0006998	protein export from nucleus//mRNA export from nucleus//mRNA splicing, via spliceosome//nuclear envelope organization	GO:0030246//GO:0005515	carbohydrate binding//protein binding	GO:0031965	nuclear membrane	KOG2123	Uncharacterized conserved protein
Cluster-1007.5664	4498	--	--	--	--	K05200	glutamate receptor 4	P39087	Glutamate receptor ionotropic, kainate 2 OS=Mus musculus OX=10090 GN=Grik2 PE=1 SV=4	PF10596//PF00060//PF10613//PF02165	U6-snRNA interacting domain of PrP8//Ligand-gated ion channel//Ligated ion channel L-glutamate- and glycine-binding site//Wilm's tumour protein	GO:0006811//GO:0007268//GO:0007165//GO:0006355	ion transport//synaptic transmission//signal transduction//regulation of transcription, DNA-templated	GO:0005234//GO:0004970//GO:0017070	extracellular-glutamate-gated ion channel activity//ionotropic glutamate receptor activity//U6 snRNA binding	GO:0005634//GO:0016020	nucleus//membrane	KOG1052	Glutamate-gated kainate-type ion channel receptor subunit GluR5 and related subunits
Cluster-1007.5667	398	--	--	--	--	K05692	actin beta/gamma 1	P23344	Actin-2 OS=Daucus carota OX=4039 PE=2 SV=1	--	--	--	--	--	--	--	--	--	--
Cluster-1007.5666	2332	--	--	LC027304.1	Haliotis diversicolor genomic DNA, BAC clone: 002_c4	--	--	Q5JXM2	Methyltransferase-like protein 24 OS=Homo sapiens OX=9606 GN=METTL24 PE=2 SV=1	--	--	--	--	--	--	--	--	--	--
Cluster-1007.5661	1654	--	--	--	--	K09458	3-oxoacyl-	Q0VCA7	3-oxoacyl-[acyl-carrier-protein] synthase, mitochondrial OS=Bos taurus OX=9913 GN=OXSM PE=2 SV=1	PF00108//PF03910	Thiolase, N-terminal domain//Adenovirus minor core protein PV	GO:0008152	metabolic process	GO:0016747	transferase activity, transferring acyl groups other than amino-acyl groups	GO:0019012	virion	KOG1394	3-oxoacyl-(acyl-carrier-protein) synthase (I and II)
Cluster-1007.5660	285	--	--	--	--	--	--	--	--	--	--	--	--	--	--	--	--	--	--
Cluster-1007.5663	1282	--	--	--	--	--	--	--	--	PF00531	Death domain	GO:0007165	signal transduction	GO:0005515	protein binding	--	--	--	--
Cluster-1007.5662	4243	--	--	XM_021502599.1	PREDICTED: Mizuhopecten yessoensis conserved oligomeric Golgi complex subunit 4-like (LOC110453602), mRNA	--	--	Q3MHG0	Conserved oligomeric Golgi complex subunit 4 OS=Bos taurus OX=9913 GN=COG4 PE=2 SV=1	PF01918	Alba	--	--	GO:0003676	nucleic acid binding	--	--	KOG0412	Golgi transport complex COD1 protein
Cluster-36100.2	268	--	--	--	--	--	--	--	--	--	--	--	--	--	--	--	--	--	--
Cluster-31956.0	761	--	--	--	--	--	--	--	--	--	--	--	--	--	--	--	--	--	--
Cluster-1007.132368	914	--	--	--	--	--	--	--	--	--	--	--	--	--	--	--	--	--	--
Cluster-1007.9071	3115	--	--	--	--	--	--	--	--	--	--	--	--	--	--	--	--	--	--
Cluster-18479.0	1011	--	--	LM125207.1	Taenia asiatica genome assembly T_asiatica_South_Korea ,scaffold TASK_scaffold0000026	--	--	Q8BHY3	Anoctamin-1 OS=Mus musculus OX=10090 GN=Ano1 PE=1 SV=2	PF16178	Dimerisation domain of Ca+-activated chloride-channel, anoctamin	--	--	GO:0046983	protein dimerization activity	--	--	--	--
Cluster-34063.0	983	--	--	--	--	--	--	Q95JD5	Sulfotransferase family cytosolic 1B member 1 OS=Canis lupus familiaris OX=9615 GN=SULT1B1 PE=1 SV=1	PF00685	Sulfotransferase domain	--	--	GO:0008146	sulfotransferase activity	--	--	--	--
Cluster-40014.0	398	--	--	--	--	--	--	--	--	--	--	--	--	--	--	--	--	--	--
Cluster-24542.0	1063	--	--	--	--	--	--	--	--	--	--	--	--	--	--	--	--	--	--
Cluster-1007.74916	356	--	--	LC027359.1	Haliotis diversicolor genomic DNA, BAC clone: 009_rep_c2378	--	--	--	--	--	--	--	--	--	--	--	--	--	--
Cluster-1007.74917	2309	--	--	GU994925.1	Haliotis discus hannai clone CHd504 microsatellite sequence	--	--	O70244	Cubilin OS=Rattus norvegicus OX=10116 GN=Cubn PE=1 SV=2	PF17122	Zinc-finger	--	--	GO:0005515//GO:0008270	protein binding//zinc ion binding	--	--	--	--
Cluster-1007.74914	923	--	--	--	--	--	--	--	--	--	--	--	--	--	--	--	--	--	--
Cluster-1007.74915	224	--	--	--	--	--	--	--	--	--	--	--	--	--	--	--	--	--	--
Cluster-1007.74912	237	--	--	LC027306.1	Haliotis diversicolor genomic DNA, BAC clone: 002_c6	--	--	--	--	--	--	--	--	--	--	--	--	--	--
Cluster-1007.74913	680	--	--	JQ906782.1	Haliotis diversicolor hypothetical protein gene, complete cds	--	--	--	--	--	--	--	--	--	--	--	--	--	--
Cluster-1007.74910	1021	--	--	--	--	--	--	--	--	--	--	--	--	--	--	--	--	--	--
Cluster-1007.74911	224	--	--	HQ650525.1	Haliotis diversicolor clone Hdi3-71 microsatellite sequence	--	--	--	--	--	--	--	--	--	--	--	--	--	--
Cluster-6498.0	646	--	--	XM_008355375.2	PREDICTED: Malus x domestica uncharacterized LOC103417183 (LOC103417183), mRNA	--	--	--	--	PF10591//PF13833//PF00036//PF13202//PF13405//PF13499	Secreted protein acidic and rich in cysteine Ca binding region//EF-hand domain pair//EF hand//EF hand//EF-hand domain//EF-hand domain pair	GO:0007165	signal transduction	GO:0005509	calcium ion binding	GO:0005578	proteinaceous extracellular matrix	--	--
Cluster-1007.74919	286	--	--	--	--	--	--	--	--	PF02729	Aspartate/ornithine carbamoyltransferase, carbamoyl-P binding domain	GO:0006520	cellular amino acid metabolic process	GO:0016743	carboxyl- or carbamoyltransferase activity	--	--	--	--
Cluster-16969.1	353	--	--	--	--	--	--	--	--	PF12090//PF06305	Spt20 family//Protein of unknown function (DUF1049)	--	--	GO:0003712	transcription cofactor activity	GO:0005667//GO:0000124//GO:0005887	transcription factor complex//SAGA complex//integral component of plasma membrane	--	--
Cluster-36756.0	525	--	--	--	--	--	--	--	--	--	--	--	--	--	--	--	--	--	--
Cluster-44551.0	633	--	--	AL121986.12	Human DNA sequence from clone RP11-101J8 on chromosome 1q21.2-22, complete sequence	--	--	--	--	--	--	--	--	--	--	--	--	--	--
Cluster-1229.0	296	--	--	--	--	--	--	--	--	--	--	--	--	--	--	--	--	--	--
Cluster-28410.0	316	--	--	HM590401.1	Antheraea yamamai ribosomal protein S21 (RpS21) mRNA, complete cds	K02971	small subunit ribosomal protein S21e	Q962Q8	40S ribosomal protein S21 OS=Spodoptera frugiperda OX=7108 GN=RpS21 PE=3 SV=1	PF01249	Ribosomal protein S21e	GO:0042254//GO:0006412	ribosome biogenesis//translation	GO:0003735	structural constituent of ribosome	GO:0005840//GO:0005622	ribosome//intracellular	KOG3486	40S ribosomal protein S21
Cluster-47366.0	558	--	--	--	--	K15162	mediator of RNA polymerase II transcription subunit 12	Q86YW9	Mediator of RNA polymerase II transcription subunit 12-like protein OS=Homo sapiens OX=9606 GN=MED12L PE=1 SV=2	PF01151	GNS1/SUR4 family	--	--	--	--	GO:0016021	integral component of membrane	--	--
Cluster-1007.66040	1276	--	--	XM_784192.4	PREDICTED: Strongylocentrotus purpuratus tubulin alpha-1 chain (LOC584331), mRNA	K07374	tubulin alpha	Q2HJ86	Tubulin alpha-1D chain OS=Bos taurus OX=9913 GN=TUBA1D PE=1 SV=1	--	--	--	--	--	--	--	--	KOG1376	Alpha tubulin
Cluster-21407.0	351	--	--	--	--	--	--	--	--	PF08496	Peptidase family S49 N-terminal	--	--	GO:0004252	serine-type endopeptidase activity	GO:0005886	plasma membrane	--	--
Cluster-3675.0	451	--	--	--	--	--	--	--	--	--	--	--	--	--	--	--	--	--	--
Cluster-25565.0	849	--	--	--	--	--	--	--	--	PF10278//PF01213//PF05038//PF15686	Mediator of RNA pol II transcription subunit 19//Adenylate cyclase associated (CAP) N terminal//Cytochrome Cytochrome b558 alpha-subunit//Lysine-rich CEACAM1 co-isolated protein family	GO:0006357//GO:0043123//GO:0007010//GO:0043066//GO:0045766	regulation of transcription from RNA polymerase II promoter//positive regulation of I-kappaB kinase/NF-kappaB signaling//cytoskeleton organization//negative regulation of apoptotic process//positive regulation of angiogenesis	GO:0020037//GO:0003779//GO:0001104	heme binding//actin binding//RNA polymerase II transcription cofactor activity	GO:0016592	mediator complex	--	--
Cluster-22089.0	761	--	--	--	--	--	--	--	--	--	--	--	--	--	--	--	--	--	--
Cluster-3194.0	1843	--	--	--	--	--	--	--	--	--	--	--	--	--	--	--	--	--	--
Cluster-15895.0	396	--	--	--	--	--	--	--	--	--	--	--	--	--	--	--	--	--	--
Cluster-1007.104408	933	--	--	--	--	--	--	--	--	PF02160	Cauliflower mosaic virus peptidase (A3)	GO:0006508	proteolysis	GO:0004190	aspartic-type endopeptidase activity	--	--	--	--
Cluster-39141.0	4032	--	--	--	--	K11512	centromere protein T	F1NPG5	Centromere protein T OS=Gallus gallus OX=9031 GN=CENPT PE=1 SV=2	PF15202//PF00125	Adipogenin//Core histone H2A/H2B/H3/H4	GO:0045444	fat cell differentiation	GO:0003677	DNA binding	--	--	--	--
Cluster-39141.1	4074	--	--	--	--	K11512	centromere protein T	F1NPG5	Centromere protein T OS=Gallus gallus OX=9031 GN=CENPT PE=1 SV=2	PF00125//PF15202	Core histone H2A/H2B/H3/H4//Adipogenin	GO:0045444	fat cell differentiation	GO:0003677	DNA binding	--	--	--	--
Cluster-8705.0	401	--	--	--	--	--	--	--	--	--	--	--	--	--	--	--	--	--	--
Cluster-31430.1	966	--	--	LC027337.1	Haliotis diversicolor genomic DNA, BAC clone: 005_rep_c2730	--	--	--	--	--	--	--	--	--	--	--	--	--	--
Cluster-1007.137796	798	--	--	--	--	--	--	--	--	--	--	--	--	--	--	--	--	--	--
Cluster-34189.0	1987	--	--	--	--	--	--	Q01812	Glutamate receptor ionotropic, kainate 4 OS=Rattus norvegicus OX=10116 GN=Grik4 PE=1 SV=1	PF00060//PF10613	Ligand-gated ion channel//Ligated ion channel L-glutamate- and glycine-binding site	GO:0007268//GO:0006811//GO:0007165	synaptic transmission//ion transport//signal transduction	GO:0005234//GO:0004970	extracellular-glutamate-gated ion channel activity//ionotropic glutamate receptor activity	GO:0016020	membrane	KOG1052	Glutamate-gated kainate-type ion channel receptor subunit GluR5 and related subunits
Cluster-1007.31298	210	--	--	--	--	--	--	--	--	--	--	--	--	--	--	--	--	--	--
Cluster-1007.31299	5040	--	--	--	--	--	--	Q3UZV7	UPF0577 protein KIAA1324-like homolog OS=Mus musculus OX=10090 PE=1 SV=1	PF00020//PF03742	TNFR/NGFR cysteine-rich region//PetN	GO:0006118//GO:0017004	obsolete electron transport//cytochrome complex assembly	GO:0005515//GO:0045158	protein binding//electron transporter, transferring electrons within cytochrome b6/f complex of photosystem II activity	GO:0009512	cytochrome b6f complex	--	--
Cluster-1007.31292	443	--	--	--	--	--	--	--	--	--	--	--	--	--	--	--	--	--	--
Cluster-1007.31293	1320	--	--	LC027336.1	Haliotis diversicolor genomic DNA, BAC clone: 005_rep_c27301	--	--	--	--	--	--	--	--	--	--	--	--	--	--
Cluster-1007.31290	271	--	--	--	--	--	--	--	--	--	--	--	--	--	--	--	--	--	--
Cluster-1007.31291	1680	--	--	--	--	--	--	--	--	--	--	--	--	--	--	--	--	--	--
Cluster-1007.31296	4772	--	--	LC027336.1	Haliotis diversicolor genomic DNA, BAC clone: 005_rep_c27301	--	--	Q3UZV7	UPF0577 protein KIAA1324-like homolog OS=Mus musculus OX=10090 PE=1 SV=1	PF00020//PF04509//PF03742	TNFR/NGFR cysteine-rich region//CheC-like family//PetN	GO:0017004//GO:0006118	cytochrome complex assembly//obsolete electron transport	GO:0016787//GO:0045158//GO:0005515	hydrolase activity//electron transporter, transferring electrons within cytochrome b6/f complex of photosystem II activity//protein binding	GO:0009512	cytochrome b6f complex	--	--
Cluster-1007.31297	1515	--	--	LC027336.1	Haliotis diversicolor genomic DNA, BAC clone: 005_rep_c27301	--	--	--	--	--	--	--	--	--	--	--	--	--	--
Cluster-1007.31294	4814	--	--	LC027336.1	Haliotis diversicolor genomic DNA, BAC clone: 005_rep_c27301	--	--	Q3UZV7	UPF0577 protein KIAA1324-like homolog OS=Mus musculus OX=10090 PE=1 SV=1	PF03742//PF00020//PF04509	PetN//TNFR/NGFR cysteine-rich region//CheC-like family	GO:0006118//GO:0017004	obsolete electron transport//cytochrome complex assembly	GO:0005515//GO:0045158//GO:0016787	protein binding//electron transporter, transferring electrons within cytochrome b6/f complex of photosystem II activity//hydrolase activity	GO:0009512	cytochrome b6f complex	--	--
Cluster-1007.31295	1433	--	--	LC027336.1	Haliotis diversicolor genomic DNA, BAC clone: 005_rep_c27301	--	--	--	--	--	--	--	--	--	--	--	--	--	--
Cluster-1007.25259	3595	--	--	EF054868.1	Haliotis midae microsatellite HmDL151 sequence	--	--	--	--	--	--	--	--	--	--	--	--	--	--
Cluster-1007.25258	709	--	--	--	--	--	--	--	--	--	--	--	--	--	--	--	--	--	--
Cluster-1007.6509	1024	--	--	LC027336.1	Haliotis diversicolor genomic DNA, BAC clone: 005_rep_c27301	--	--	--	--	--	--	--	--	--	--	--	--	--	--
Cluster-1007.6508	282	--	--	--	--	--	--	--	--	--	--	--	--	--	--	--	--	--	--
Cluster-1007.6505	320	--	--	--	--	--	--	--	--	--	--	--	--	--	--	--	--	--	--
Cluster-1007.6504	971	--	--	--	--	K14973	PAXIP1-associated protein 1	--	--	--	--	--	--	--	--	--	--	--	--
Cluster-1007.6507	1026	--	--	XM_008370565.2	PREDICTED: Malus x domestica chlorophyll a-b binding protein 6, chloroplastic (LOC103432374), mRNA	--	--	Q01667	Chlorophyll a-b binding protein 6, chloroplastic OS=Arabidopsis thaliana OX=3702 GN=LHCA1 PE=1 SV=1	--	--	--	--	--	--	--	--	--	--
Cluster-1007.6506	3138	--	--	--	--	K14165	atypical dual specificity phosphatase	Q8WTR2	Dual specificity protein phosphatase 19 OS=Homo sapiens OX=9606 GN=DUSP19 PE=1 SV=1	PF00465//PF00102//PF01290//PF00782	Iron-containing alcohol dehydrogenase//Protein-tyrosine phosphatase//Thymosin beta-4 family//Dual specificity phosphatase, catalytic domain	GO:0055114//GO:0007015//GO:0006570//GO:0006470	oxidation-reduction process//actin filament organization//tyrosine metabolic process//protein dephosphorylation	GO:0003785//GO:0008138//GO:0004725//GO:0016491//GO:0046872	actin monomer binding//protein tyrosine/serine/threonine phosphatase activity//protein tyrosine phosphatase activity//oxidoreductase activity//metal ion binding	--	--	KOG1716	Dual specificity phosphatase
Cluster-1007.6501	575	--	--	--	--	--	--	--	--	--	--	--	--	--	--	--	--	--	--
Cluster-1007.6500	738	--	--	--	--	--	--	--	--	--	--	--	--	--	--	--	--	--	--
Cluster-1007.6503	929	--	--	--	--	--	--	--	--	--	--	--	--	--	--	--	--	--	--
Cluster-1007.6502	1062	--	--	--	--	--	--	--	--	--	--	--	--	--	--	--	--	--	--
Cluster-27589.0	1047	--	--	--	--	--	--	--	--	--	--	--	--	--	--	--	--	--	--
Cluster-21154.0	878	--	--	--	--	--	--	--	--	--	--	--	--	--	--	--	--	--	--
Cluster-28662.0	701	--	--	--	--	--	--	--	--	--	--	--	--	--	--	--	--	--	--
Cluster-1007.56378	4270	--	--	LC027302.1	Haliotis diversicolor genomic DNA, BAC clone: 002_c2	--	--	Q3U2I3	FTS and Hook-interacting protein OS=Mus musculus OX=10090 GN=Fam160a2 PE=1 SV=2	PF09165	Ubiquinol-cytochrome c reductase 8 kDa, N-terminal	GO:0015992//GO:0006118//GO:0006119//GO:0055114	proton transport//obsolete electron transport//oxidative phosphorylation//oxidation-reduction process	GO:0008121	ubiquinol-cytochrome-c reductase activity	--	--	KOG3695	Uncharacterized conserved protein
Cluster-1007.56379	2787	--	--	--	--	K05757	actin related protein 2/3 complex, subunit 1A/1B	Q92747	Actin-related protein 2/3 complex subunit 1A OS=Homo sapiens OX=9606 GN=ARPC1A PE=2 SV=2	PF00400	WD domain, G-beta repeat	--	--	GO:0005515	protein binding	--	--	KOG1523	Actin-related protein Arp2/3 complex, subunit ARPC1/p41-ARC
Cluster-1007.61208	5753	--	--	--	--	--	--	Q5RHP9	Glutamate-rich protein 3 OS=Homo sapiens OX=9606 GN=ERICH3 PE=2 SV=1	--	--	--	--	--	--	--	--	--	--
Cluster-1007.61209	5564	--	--	--	--	--	--	Q5RHP9	Glutamate-rich protein 3 OS=Homo sapiens OX=9606 GN=ERICH3 PE=2 SV=1	--	--	--	--	--	--	--	--	--	--
Cluster-1007.61200	3782	--	--	--	--	--	--	Q03412	Innexin unc-7 OS=Caenorhabditis elegans OX=6239 GN=unc-7 PE=2 SV=1	PF00876	Innexin	--	--	--	--	GO:0005921	gap junction	--	--
Cluster-1007.61201	1044	--	--	--	--	--	--	--	--	--	--	--	--	--	--	--	--	--	--
Cluster-1007.61202	2005	--	--	--	--	--	--	--	--	--	--	--	--	--	--	--	--	--	--
Cluster-1007.61203	3844	--	--	--	--	--	--	Q03412	Innexin unc-7 OS=Caenorhabditis elegans OX=6239 GN=unc-7 PE=2 SV=1	PF00876	Innexin	--	--	--	--	GO:0005921	gap junction	--	--
Cluster-1007.61204	2103	--	--	--	--	--	--	--	--	--	--	--	--	--	--	--	--	--	--
Cluster-1007.61205	1106	--	--	--	--	--	--	--	--	--	--	--	--	--	--	--	--	--	--
Cluster-1007.61206	272	--	--	--	--	--	--	--	--	--	--	--	--	--	--	--	--	--	--
Cluster-1007.61207	7648	--	--	--	--	--	--	Q5RHP9	Glutamate-rich protein 3 OS=Homo sapiens OX=9606 GN=ERICH3 PE=2 SV=1	--	--	--	--	--	--	--	--	--	--
Cluster-28976.0	758	--	--	--	--	--	--	B1WAS2	Hormonally up-regulated neu tumor-associated kinase homolog OS=Xenopus tropicalis OX=8364 GN=hunk PE=2 SV=1	PF07714//PF00069	Protein tyrosine kinase//Protein kinase domain	GO:0006468	protein phosphorylation	GO:0004672//GO:0005524	protein kinase activity//ATP binding	--	--	KOG0583	Serine/threonine protein kinase
Cluster-1007.56372	511	--	--	--	--	--	--	--	--	--	--	--	--	--	--	--	--	--	--
Cluster-17709.0	754	--	--	--	--	--	--	--	--	PF02535	ZIP Zinc transporter	GO:0030001//GO:0055085	metal ion transport//transmembrane transport	GO:0046873	metal ion transmembrane transporter activity	GO:0016020	membrane	--	--
Cluster-1007.56373	3886	--	--	--	--	--	--	Q99622	Protein C10 OS=Homo sapiens OX=9606 GN=C12orf57 PE=1 SV=1	--	--	--	--	--	--	--	--	--	--
Cluster-26604.0	629	--	--	--	--	--	--	--	--	--	--	--	--	--	--	--	--	--	--
Cluster-44487.0	1380	--	--	--	--	K12739	peptidyl-prolyl cis-trans isomerase-like 6	Q8IXY8	Peptidyl-prolyl cis-trans isomerase-like 6 OS=Homo sapiens OX=9606 GN=PPIL6 PE=2 SV=1	PF00160	Cyclophilin type peptidyl-prolyl cis-trans isomerase/CLD	GO:0000413//GO:0006457	protein peptidyl-prolyl isomerization//protein folding	GO:0003755	peptidyl-prolyl cis-trans isomerase activity	--	--	--	--
Cluster-1007.141782	3722	--	--	KJ160078.1	Haliotis tuberculata tuberculata microsatellite Haltub111 sequence	--	--	--	--	--	--	--	--	--	--	--	--	--	--
Cluster-1007.37105	385	--	--	--	--	--	--	--	--	--	--	--	--	--	--	--	--	--	--
Cluster-41151.0	537	--	--	--	--	K01737	6-pyruvoyltetrahydropterin/6-carboxytetrahydropterin synthase	Q90W95	6-pyruvoyl tetrahydrobiopterin synthase OS=Poecilia reticulata OX=8081 GN=pts PE=2 SV=1	--	--	--	--	--	--	--	--	--	--
Cluster-14745.0	333	--	--	--	--	--	--	--	--	--	--	--	--	--	--	--	--	--	--
Cluster-1007.20755	894	--	--	--	--	--	--	--	--	--	--	--	--	--	--	--	--	--	--
Cluster-1007.20754	1652	--	--	--	--	--	--	Q8K2Y9	Cerebral cavernous malformations protein 2 homolog OS=Mus musculus OX=10090 GN=Ccm2 PE=1 SV=1	PF00667	FAD binding domain	GO:0055114	oxidation-reduction process	GO:0016491	oxidoreductase activity	--	--	--	--
Cluster-1007.20757	1888	--	--	--	--	--	--	--	--	PF08935	Viral protein VP4 subunit	--	--	--	--	GO:0019030	icosahedral viral capsid	--	--
Cluster-1007.20756	1554	--	--	LC027294.1	Haliotis diversicolor genomic DNA, BAC clone: 001_rep_c977	--	--	--	--	--	--	--	--	--	--	--	--	--	--
Cluster-1007.20751	1746	--	--	LC027358.1	Haliotis diversicolor genomic DNA, BAC clone: 009_rep_c2377	K01276	dipeptidyl-peptidase II	Q9ET22	Dipeptidyl peptidase 2 OS=Mus musculus OX=10090 GN=Dpp7 PE=1 SV=2	PF00326//PF05577	Prolyl oligopeptidase family//Serine carboxypeptidase S28	GO:0006508	proteolysis	GO:0008236	serine-type peptidase activity	--	--	KOG2183	Prolylcarboxypeptidase (angiotensinase C)
Cluster-1007.20750	624	--	--	--	--	--	--	--	--	--	--	--	--	--	--	--	--	--	--
Cluster-1007.20753	1342	--	--	--	--	K04402	growth arrest and DNA-damage-inducible protein	P48317	Growth arrest and DNA damage-inducible protein GADD45 alpha OS=Rattus norvegicus OX=10116 GN=Gadd45a PE=2 SV=1	PF06610	L-alanine exporter	--	--	GO:0034639	L-amino acid efflux transmembrane transporter activity	GO:0016021	integral component of membrane	--	--
Cluster-1007.20752	992	--	--	--	--	--	--	--	--	--	--	--	--	--	--	--	--	--	--
Cluster-1007.64184	1271	--	--	--	--	--	--	--	--	PF11789	Zinc-finger of the MIZ type in Nse subunit	--	--	GO:0008270	zinc ion binding	--	--	--	--
Cluster-1007.64185	1332	--	--	--	--	--	--	--	--	PF06305	Protein of unknown function (DUF1049)	--	--	--	--	GO:0005887	integral component of plasma membrane	--	--
Cluster-673.0	677	--	--	LC027358.1	Haliotis diversicolor genomic DNA, BAC clone: 009_rep_c2377	--	--	--	--	--	--	--	--	--	--	--	--	--	--
Cluster-1007.64187	4178	--	--	DQ993226.1	Haliotis midae microsatellite HmLCS55T sequence	--	--	Q3T0Q2	Transmembrane protein 59 OS=Bos taurus OX=9913 GN=TMEM59 PE=2 SV=2	--	--	--	--	--	--	--	--	--	--
Cluster-1007.64180	500	--	--	LC027308.1	Haliotis diversicolor genomic DNA, BAC clone: 002_c8	--	--	--	--	--	--	--	--	--	--	--	--	--	--
Cluster-1007.64181	1555	--	--	LC027342.1	Haliotis diversicolor genomic DNA, BAC clone: 006_rep_c2414	--	--	--	--	--	--	--	--	--	--	--	--	--	--
Cluster-1007.64182	992	--	--	--	--	--	--	--	--	--	--	--	--	--	--	--	--	--	--
Cluster-1007.64183	433	--	--	--	--	K00420	ubiquinol-cytochrome c reductase subunit 10	P07552	Cytochrome b-c1 complex subunit 10 OS=Bos taurus OX=9913 GN=UQCR11 PE=1 SV=2	PF09239//PF08997	Topoisomerase VI B subunit, transducer//Ubiquinol-cytochrome C reductase complex, 6.4kD protein	GO:0006118//GO:0006265//GO:0015992//GO:0006119	obsolete electron transport//DNA topological change//proton transport//oxidative phosphorylation	GO:0003677//GO:0003918//GO:0009055//GO:0008121	DNA binding//DNA topoisomerase type II (ATP-hydrolyzing) activity//electron carrier activity//ubiquinol-cytochrome-c reductase activity	--	--	--	--
Cluster-27825.0	889	--	--	--	--	--	--	--	--	--	--	--	--	--	--	--	--	--	--
Cluster-43404.0	743	--	--	--	--	--	--	--	--	--	--	--	--	--	--	--	--	--	--
Cluster-1007.109019	315	--	--	--	--	--	--	--	--	--	--	--	--	--	--	--	--	--	--
Cluster-1007.109018	540	--	--	--	--	--	--	--	--	--	--	--	--	--	--	--	--	--	--
Cluster-1007.109017	602	--	--	--	--	--	--	--	--	--	--	--	--	--	--	--	--	--	--
Cluster-1007.58969	1650	--	--	--	--	--	--	--	--	PF01577	Potyvirus P1 protease	GO:0006508	proteolysis	GO:0004197	cysteine-type endopeptidase activity	--	--	--	--
Cluster-1007.109015	803	--	--	XM_024498739.1	Echinococcus granulosus Spondin-1 (EGR_09490), partial mRNA	--	--	Q9GLX9	Spondin-1 OS=Bos taurus OX=9913 GN=SPON1 PE=1 SV=1	--	--	--	--	--	--	--	--	KOG3539	Spondins, extracellular matrix proteins
Cluster-1007.109014	322	--	--	--	--	--	--	--	--	PF05735//PF05586//PF14171	Thrombospondin C-terminal region//Anthrax receptor C-terminus region//Toxin SpoIISA, type II toxin-antitoxin system	GO:0007165//GO:0009405//GO:0007155	signal transduction//pathogenesis//cell adhesion	GO:0005509//GO:0004872	calcium ion binding//receptor activity	GO:0016021//GO:0005576	integral component of membrane//extracellular region	--	--
Cluster-1007.109013	348	--	--	--	--	--	--	--	--	--	--	--	--	--	--	--	--	--	--
Cluster-1007.109012	5056	--	--	XM_011934440.1	PREDICTED: Colobus angolensis palliatus ADP-ribosylation factor GTPase activating protein 1 (ARFGAP1), transcript variant X1, mRNA	K12492	ADP-ribosylation factor GTPase-activating protein 1	Q62848	ADP-ribosylation factor GTPase-activating protein 1 OS=Rattus norvegicus OX=10116 GN=Arfgap1 PE=1 SV=1	PF01412//PF01780	Putative GTPase activating protein for Arf//Ribosomal L37ae protein family	GO:0042254//GO:0006412	ribosome biogenesis//translation	GO:0005096//GO:0003735	GTPase activator activity//structural constituent of ribosome	GO:0005622//GO:0005840	intracellular//ribosome	KOG0704	ADP-ribosylation factor GTPase activator
Cluster-1007.109011	1395	--	--	--	--	--	--	--	--	--	--	--	--	--	--	--	--	--	--
Cluster-1007.109010	227	--	--	--	--	--	--	--	--	--	--	--	--	--	--	--	--	--	--
Cluster-13790.0	1148	--	--	--	--	--	--	--	--	--	--	--	--	--	--	--	--	--	--
Cluster-128.0	562	--	--	KX156257.1	Spirobranchus giganteus mitochondrion, complete genome	--	--	--	--	--	--	--	--	--	--	--	--	--	--
Cluster-6446.0	1112	--	--	XM_008384596.2	PREDICTED: Malus x domestica very-long-chain enoyl-CoA reductase (LOC103445586), mRNA	K10258	very-long-chain enoyl-CoA reductase	Q9M2U2	Very-long-chain enoyl-CoA reductase OS=Arabidopsis thaliana OX=3702 GN=ECR PE=1 SV=1	PF02544//PF03930	3-oxo-5-alpha-steroid 4-dehydrogenase//Recombinase Flp protein N-terminus	GO:0006629//GO:0006310	lipid metabolic process//DNA recombination	GO:0016627	oxidoreductase activity, acting on the CH-CH group of donors	GO:0016021//GO:0005737	integral component of membrane//cytoplasm	KOG1639	Steroid reductase required for elongation of the very long chain fatty acids
Cluster-1007.58965	1286	--	--	LC027358.1	Haliotis diversicolor genomic DNA, BAC clone: 009_rep_c2377	--	--	--	--	--	--	--	--	--	--	--	--	--	--
Cluster-45948.0	2266	--	--	--	--	K19613	leucine-rich repeat protein SHOC2	Q5F4C4	Leucine-rich repeat protein SHOC-2 OS=Gallus gallus OX=9031 GN=SHOC2 PE=2 SV=1	PF13516//PF13855//PF00560	Leucine Rich repeat//Leucine rich repeat//Leucine Rich Repeat	--	--	GO:0005515	protein binding	--	--	KOG0619	FOG: Leucine rich repeat
Cluster-1007.100820	4250	--	--	--	--	--	--	J3S836	Venom factor OS=Crotalus adamanteus OX=8729 PE=2 SV=1	PF07678//PF01835//PF00207	A-macroglobulin complement component//MG2 domain//Alpha-2-macroglobulin family	--	--	GO:0004866	endopeptidase inhibitor activity	GO:0005615	extracellular space	KOG1366	Alpha-macroglobulin
Cluster-3057.0	471	--	--	--	--	--	--	--	--	--	--	--	--	--	--	--	--	--	--
Cluster-3057.1	765	--	--	--	--	--	--	--	--	--	--	--	--	--	--	--	--	--	--
Cluster-1007.100823	5766	--	--	--	--	--	--	P14046	Alpha-1-inhibitor 3 OS=Rattus norvegicus OX=10116 GN=A1i3 PE=1 SV=1	PF00207//PF01835//PF07677//PF07678	Alpha-2-macroglobulin family//MG2 domain//A-macroglobulin receptor//A-macroglobulin complement component	--	--	GO:0004866	endopeptidase inhibitor activity	GO:0005576//GO:0005615	extracellular region//extracellular space	KOG1366	Alpha-macroglobulin
Cluster-17688.0	359	--	--	LC027310.1	Haliotis diversicolor genomic DNA, BAC clone: 002_c10	K14402	cleavage and polyadenylation specificity factor subunit 2	Q9W799	Cleavage and polyadenylation specificity factor subunit 2 OS=Xenopus laevis OX=8355 GN=cpsf2 PE=1 SV=1	--	--	--	--	--	--	--	--	KOG1135	mRNA cleavage and polyadenylation factor II complex, subunit CFT2 (CPSF subunit)
Cluster-1007.100822	4091	--	--	--	--	--	--	J3S836	Venom factor OS=Crotalus adamanteus OX=8729 PE=2 SV=1	PF07678//PF00207//PF08496//PF01835	A-macroglobulin complement component//Alpha-2-macroglobulin family//Peptidase family S49 N-terminal//MG2 domain	--	--	GO:0004252//GO:0004866	serine-type endopeptidase activity//endopeptidase inhibitor activity	GO:0005886//GO:0005615	plasma membrane//extracellular space	KOG1366	Alpha-macroglobulin
Cluster-12901.0	649	--	--	--	--	--	--	--	--	--	--	--	--	--	--	--	--	--	--
Cluster-1007.100825	5434	--	--	XM_013234798.1	PREDICTED: Biomphalaria glabrata lysine-specific demethylase 3A-like (LOC106074056), transcript variant X3, mRNA	K11449	jumonji domain-containing protein 1C	Q6PCM1	Lysine-specific demethylase 3A OS=Mus musculus OX=10090 GN=Kdm3a PE=1 SV=1	PF00837//PF02166//PF00762//PF02148//PF03153//PF07649	Iodothyronine deiodinase//Androgen receptor//Ferrochelatase//Zn-finger in ubiquitin-hydrolases and other protein//Transcription factor IIA, alpha/beta subunit//C1-like domain	GO:0006355//GO:0007165//GO:0015994//GO:0006367//GO:0030521//GO:0006783//GO:0055114	regulation of transcription, DNA-templated//signal transduction//chlorophyll metabolic process//transcription initiation from RNA polymerase II promoter//androgen receptor signaling pathway//heme biosynthetic process//oxidation-reduction process	GO:0004325//GO:0003677//GO:0004800//GO:0047134//GO:0008270//GO:0004882//GO:0005496	ferrochelatase activity//DNA binding//thyroxine 5'-deiodinase activity//protein-disulfide reductase activity//zinc ion binding//androgen receptor activity//steroid binding	GO:0005634//GO:0005672	nucleus//transcription factor TFIIA complex	KOG1356	Putative transcription factor 5qNCA, contains JmjC domain
Cluster-9730.0	247	--	--	--	--	--	--	--	--	--	--	--	--	--	--	--	--	--	--
Cluster-1007.100824	4237	--	--	--	--	--	--	J3S836	Venom factor OS=Crotalus adamanteus OX=8729 PE=2 SV=1	PF07678//PF01213//PF00207//PF01835	A-macroglobulin complement component//Adenylate cyclase associated (CAP) N terminal//Alpha-2-macroglobulin family//MG2 domain	GO:0007010	cytoskeleton organization	GO:0004866//GO:0003779	endopeptidase inhibitor activity//actin binding	GO:0005615	extracellular space	KOG1366	Alpha-macroglobulin
Cluster-1007.100827	2461	--	--	--	--	--	--	--	--	PF05374	Mu-Conotoxin	GO:0006810//GO:0009405	transport//pathogenesis	GO:0019871	sodium channel inhibitor activity	GO:0005576	extracellular region	--	--
Cluster-1007.100826	6207	--	--	XM_013234798.1	PREDICTED: Biomphalaria glabrata lysine-specific demethylase 3A-like (LOC106074056), transcript variant X3, mRNA	K11449	jumonji domain-containing protein 1C	Q6PCM1	Lysine-specific demethylase 3A OS=Mus musculus OX=10090 GN=Kdm3a PE=1 SV=1	PF07649//PF00762	C1-like domain//Ferrochelatase	GO:0006783//GO:0015994//GO:0055114	heme biosynthetic process//chlorophyll metabolic process//oxidation-reduction process	GO:0004325//GO:0047134	ferrochelatase activity//protein-disulfide reductase activity	--	--	KOG1356	Putative transcription factor 5qNCA, contains JmjC domain
Cluster-20007.0	431	--	--	--	--	--	--	--	--	--	--	--	--	--	--	--	--	--	--
Cluster-1007.21408	2842	--	--	--	--	K00710	polypeptide N-acetylgalactosaminyltransferase	Q95ZJ1	Polypeptide N-acetylgalactosaminyltransferase 5 OS=Caenorhabditis elegans OX=6239 GN=gly-5 PE=2 SV=2	--	--	--	--	--	--	--	--	KOG3736	Polypeptide N-acetylgalactosaminyltransferase
Cluster-1007.21409	3535	--	--	--	--	K00710	polypeptide N-acetylgalactosaminyltransferase	Q95ZJ1	Polypeptide N-acetylgalactosaminyltransferase 5 OS=Caenorhabditis elegans OX=6239 GN=gly-5 PE=2 SV=2	PF01609//PF00032	Transposase DDE domain//Cytochrome b(C-terminal)/b6/petD	GO:0006313//GO:0006118	transposition, DNA-mediated//obsolete electron transport	GO:0009055//GO:0016491//GO:0004803//GO:0003677	electron carrier activity//oxidoreductase activity//transposase activity//DNA binding	GO:0016020	membrane	KOG3736	Polypeptide N-acetylgalactosaminyltransferase
Cluster-1007.65279	3580	--	--	KP681240.1	Haliotis discus discus serpin B-like protein 2 mRNA, complete cds	K13963	serpin B	Q60854	Serpin B6 OS=Mus musculus OX=10090 GN=Serpinb6 PE=1 SV=1	PF04104//PF00525	Eukaryotic and archaeal DNA primase, large subunit//Alpha crystallin A chain, N terminal	GO:0007423//GO:0006351//GO:0006269	sensory organ development//transcription, DNA-templated//DNA replication, synthesis of RNA primer	GO:0003896//GO:0005212	DNA primase activity//structural constituent of eye lens	GO:0005730//GO:0005657	nucleolus//replication fork	--	--
Cluster-1007.65278	3215	--	--	KP681240.1	Haliotis discus discus serpin B-like protein 2 mRNA, complete cds	K13963	serpin B	Q60854	Serpin B6 OS=Mus musculus OX=10090 GN=Serpinb6 PE=1 SV=1	PF00525//PF04104	Alpha crystallin A chain, N terminal//Eukaryotic and archaeal DNA primase, large subunit	GO:0006269//GO:0006351//GO:0007423	DNA replication, synthesis of RNA primer//transcription, DNA-templated//sensory organ development	GO:0005212//GO:0003896	structural constituent of eye lens//DNA primase activity	GO:0005657//GO:0005730	replication fork//nucleolus	--	--
Cluster-11541.0	491	--	--	--	--	--	--	--	--	--	--	--	--	--	--	--	--	--	--
Cluster-1007.21402	1488	--	--	--	--	--	--	--	--	--	--	--	--	--	--	--	--	--	--
Cluster-1007.21403	1868	--	--	--	--	K00710	polypeptide N-acetylgalactosaminyltransferase	Q95ZJ1	Polypeptide N-acetylgalactosaminyltransferase 5 OS=Caenorhabditis elegans OX=6239 GN=gly-5 PE=2 SV=2	PF01609	Transposase DDE domain	GO:0006313	transposition, DNA-mediated	GO:0003677//GO:0004803	DNA binding//transposase activity	--	--	KOG3736	Polypeptide N-acetylgalactosaminyltransferase
Cluster-1007.21400	841	--	--	--	--	--	--	Q63ZR6	UDP-glucuronosyltransferase 3A1 OS=Xenopus laevis OX=8355 GN=ugt3a1 PE=2 SV=1	PF00201	UDP-glucoronosyl and UDP-glucosyl transferase	GO:0008152	metabolic process	GO:0016758	transferase activity, transferring hexosyl groups	--	--	KOG1192	UDP-glucuronosyl and UDP-glucosyl transferase
Cluster-1007.65276	261	--	--	--	--	--	--	--	--	--	--	--	--	--	--	--	--	--	--
Cluster-1007.21406	2825	--	--	--	--	K00710	polypeptide N-acetylgalactosaminyltransferase	Q95ZJ1	Polypeptide N-acetylgalactosaminyltransferase 5 OS=Caenorhabditis elegans OX=6239 GN=gly-5 PE=2 SV=2	--	--	--	--	--	--	--	--	KOG3736	Polypeptide N-acetylgalactosaminyltransferase
Cluster-1007.65270	449	--	--	LC027302.1	Haliotis diversicolor genomic DNA, BAC clone: 002_c2	--	--	--	--	--	--	--	--	--	--	--	--	--	--
Cluster-1007.65273	281	--	--	LC027302.1	Haliotis diversicolor genomic DNA, BAC clone: 002_c2	--	--	--	--	--	--	--	--	--	--	--	--	--	--
Cluster-1007.65272	541	--	--	--	--	--	--	--	--	PF00580	UvrD/REP helicase N-terminal domain	--	--	GO:0005524	ATP binding	--	--	--	--
Cluster-1007.99816	4129	--	--	LC027332.1	Haliotis diversicolor genomic DNA, BAC clone: 004_rep_c861	--	--	--	--	PF06467	MYM-type Zinc finger with FCS sequence motif	--	--	GO:0008270	zinc ion binding	--	--	--	--
Cluster-1007.99817	258	--	--	LC027297.1	Haliotis diversicolor genomic DNA, BAC clone: 001_rep_c980	--	--	--	--	--	--	--	--	--	--	--	--	--	--
Cluster-1007.99814	3182	--	--	LC027332.1	Haliotis diversicolor genomic DNA, BAC clone: 004_rep_c861	--	--	--	--	PF06467	MYM-type Zinc finger with FCS sequence motif	--	--	GO:0008270	zinc ion binding	--	--	--	--
Cluster-1007.99815	3508	--	--	LC027332.1	Haliotis diversicolor genomic DNA, BAC clone: 004_rep_c861	--	--	--	--	PF06467	MYM-type Zinc finger with FCS sequence motif	--	--	GO:0008270	zinc ion binding	--	--	--	--
Cluster-1007.99812	3509	--	--	LC027332.1	Haliotis diversicolor genomic DNA, BAC clone: 004_rep_c861	--	--	--	--	PF06467	MYM-type Zinc finger with FCS sequence motif	--	--	GO:0008270	zinc ion binding	--	--	--	--
Cluster-1007.20898	361	--	--	--	--	--	--	--	--	PF05887	Procyclic acidic repetitive protein (PARP)	--	--	--	--	GO:0016020	membrane	--	--
Cluster-1007.99810	3782	--	--	--	--	--	--	A2RT91	Ankyrin and armadillo repeat-containing protein OS=Mus musculus OX=10090 GN=Ankar PE=2 SV=1	PF02985//PF00514//PF13606//PF06371	HEAT repeat//Armadillo/beta-catenin-like repeat//Ankyrin repeat//Diaphanous GTPase-binding Domain	GO:0030036	actin cytoskeleton organization	GO:0005515//GO:0017048//GO:0003779	protein binding//Rho GTPase binding//actin binding	--	--	--	--
Cluster-1007.99811	1048	--	--	--	--	--	--	--	--	PF06467	MYM-type Zinc finger with FCS sequence motif	--	--	GO:0008270	zinc ion binding	--	--	--	--
Cluster-17857.0	713	--	--	--	--	--	--	--	--	--	--	--	--	--	--	--	--	--	--
Cluster-1007.99818	4130	--	--	LC027332.1	Haliotis diversicolor genomic DNA, BAC clone: 004_rep_c861	--	--	--	--	PF06467	MYM-type Zinc finger with FCS sequence motif	--	--	GO:0008270	zinc ion binding	--	--	--	--
Cluster-1007.99819	249	--	--	LC027335.1	Haliotis diversicolor genomic DNA, BAC clone: 004_rep_c864	--	--	--	--	--	--	--	--	--	--	--	--	--	--
Cluster-1007.59944	5907	--	--	--	--	--	--	Q6V0I7	Protocadherin Fat 4 OS=Homo sapiens OX=9606 GN=FAT4 PE=1 SV=2	PF03839//PF00942//PF00028	Translocation protein Sec62//Cellulose binding domain//Cadherin domain	GO:0015031//GO:0005975//GO:0007156	protein transport//carbohydrate metabolic process//homophilic cell adhesion via plasma membrane adhesion molecules	GO:0005509//GO:0030248//GO:0008565	calcium ion binding//cellulose binding//protein transporter activity	GO:0016021//GO:0016020	integral component of membrane//membrane	--	--
Cluster-1007.59945	205	--	--	--	--	--	--	--	--	--	--	--	--	--	--	--	--	--	--
Cluster-1007.59946	1742	--	--	EF472916.1	Haliotis discus hannai small heat shock protein 26 mRNA, complete cds	--	--	P06582	Heat shock protein Hsp-16.2 OS=Caenorhabditis elegans OX=6239 GN=hsp-16.2 PE=3 SV=1	PF00096	Zinc finger, C2H2 type	--	--	GO:0046872	metal ion binding	--	--	KOG3591	Alpha crystallins
Cluster-1007.59947	442	--	--	--	--	--	--	--	--	PF04995//PF00964//PF01299	Heme exporter protein D (CcmD)//Elicitin//Lysosome-associated membrane glycoprotein (Lamp)	GO:0009405//GO:0015886//GO:0006952//GO:0017004	pathogenesis//heme transport//defense response//cytochrome complex assembly	--	--	GO:0005576//GO:0016020//GO:0016021	extracellular region//membrane//integral component of membrane	--	--
Cluster-1007.59940	3508	--	--	GU995355.1	Haliotis discus hannai clone CH1142 microsatellite sequence	--	--	--	--	PF05851//PF11973	Lentivirus virion infectivity factor (VIF)//NQRA C-terminal domain	GO:0055114//GO:0019058//GO:0006118	oxidation-reduction process//viral life cycle//obsolete electron transport	GO:0016655	oxidoreductase activity, acting on NAD(P)H, quinone or similar compound as acceptor	--	--	--	--
Cluster-1007.59941	1989	--	--	XM_019068503.1	PREDICTED: Cyprinus carpio proton myo-inositol cotransporter-like (LOC109050967), mRNA	K08150	MFS transporter, SP family, solute carrier family 2 (myo-inositol transporter), member 13	Q96QE2	Proton myo-inositol cotransporter OS=Homo sapiens OX=9606 GN=SLC2A13 PE=1 SV=3	PF07690//PF03419//PF00083//PF15750	Major Facilitator Superfamily//Sporulation factor SpoIIGA//Sugar (and other) transporter//Ubiquitin-binding zinc-finger	GO:0055085//GO:0006508//GO:0030436	transmembrane transport//proteolysis//asexual sporulation	GO:0004190//GO:0043130//GO:0022857	aspartic-type endopeptidase activity//ubiquitin binding//transmembrane transporter activity	GO:0016021	integral component of membrane	KOG0254	Predicted transporter (major facilitator superfamily)
Cluster-1007.59942	833	--	--	LC027340.1	Haliotis diversicolor genomic DNA, BAC clone: 006_rep_c2412	--	--	--	--	--	--	--	--	--	--	--	--	--	--
Cluster-1007.59943	379	--	--	LC027340.1	Haliotis diversicolor genomic DNA, BAC clone: 006_rep_c2412	--	--	--	--	--	--	--	--	--	--	--	--	--	--
Cluster-35209.0	846	--	--	--	--	--	--	--	--	--	--	--	--	--	--	--	--	--	--
Cluster-1007.59948	222	--	--	--	--	--	--	--	--	--	--	--	--	--	--	--	--	--	--
Cluster-1007.59949	483	--	--	--	--	--	--	--	--	--	--	--	--	--	--	--	--	--	--
Cluster-1007.118958	1195	--	--	--	--	--	--	--	--	PF01530	Zinc finger, C2HC type	GO:0006355	regulation of transcription, DNA-templated	GO:0008270//GO:0003700	zinc ion binding//transcription factor activity, sequence-specific DNA binding	GO:0005634//GO:0005667	nucleus//transcription factor complex	--	--
Cluster-1007.118959	204	--	--	--	--	--	--	--	--	--	--	--	--	--	--	--	--	--	--
Cluster-25263.0	843	--	--	--	--	--	--	--	--	--	--	--	--	--	--	--	--	--	--
Cluster-1007.118950	4412	--	--	--	--	--	--	Q54GE6	Probable malate dehydrogenase 1 OS=Dictyostelium discoideum OX=44689 GN=mdhA PE=1 SV=1	PF00891//PF08241//PF01209//PF00197//PF05175//PF02390//PF08704//PF05148//PF03141//PF01135//PF00056//PF05958//PF05401	O-methyltransferase//Methyltransferase domain//ubiE/COQ5 methyltransferase family//Trypsin and protease inhibitor//Methyltransferase small domain//Putative methyltransferase//tRNA methyltransferase complex GCD14 subunit//Hypothetical methyltransferase//Putative S-adenosyl-L-methionine-dependent methyltransferase//Protein-L-isoaspartate(D-aspartate) O-methyltransferase (PCMT)//lactate/malate dehyd…	GO:0006479//GO:0030488//GO:0006396//GO:0008033//GO:0046500//GO:0009451//GO:0055114//GO:0006400//GO:0008152//GO:0009312//GO:0006464//GO:0009877	protein methylation//tRNA methylation//RNA processing//tRNA processing//S-adenosylmethionine metabolic process//RNA modification//oxidation-reduction process//tRNA modification//metabolic process//oligosaccharide biosynthetic process//cellular protein modification process//nodulation	GO:0004719//GO:0008757//GO:0008173//GO:0008171//GO:0016491//GO:0016429//GO:0008176//GO:0008168//GO:0004866	protein-L-isoaspartate (D-aspartate) O-methyltransferase activity//S-adenosylmethionine-dependent methyltransferase activity//RNA methyltransferase activity//O-methyltransferase activity//oxidoreductase activity//tRNA (adenine-N1-)-methyltransferase activity//tRNA (guanine-N7-)-methyltransferase activity//methyltransferase activity//endopeptidase inhibitor activity	GO:0031515	tRNA (m1A) methyltransferase complex	KOG1496	Malate dehydrogenase
Cluster-1007.118951	4422	--	--	--	--	--	--	Q54GE6	Probable malate dehydrogenase 1 OS=Dictyostelium discoideum OX=44689 GN=mdhA PE=1 SV=1	PF00891//PF05175//PF00197//PF01209//PF08241//PF01135//PF05148//PF03141//PF08704//PF02390//PF05401//PF05958//PF00056	O-methyltransferase//Methyltransferase small domain//Trypsin and protease inhibitor//ubiE/COQ5 methyltransferase family//Methyltransferase domain//Protein-L-isoaspartate(D-aspartate) O-methyltransferase (PCMT)//Hypothetical methyltransferase//Putative S-adenosyl-L-methionine-dependent methyltransferase//tRNA methyltransferase complex GCD14 subunit//Putative methyltransferase//Nodulation protein S…	GO:0009877//GO:0006400//GO:0008152//GO:0009312//GO:0006464//GO:0008033//GO:0009451//GO:0046500//GO:0055114//GO:0006479//GO:0030488//GO:0006396	nodulation//tRNA modification//metabolic process//oligosaccharide biosynthetic process//cellular protein modification process//tRNA processing//RNA modification//S-adenosylmethionine metabolic process//oxidation-reduction process//protein methylation//tRNA methylation//RNA processing	GO:0016429//GO:0008168//GO:0008176//GO:0004866//GO:0016491//GO:0008173//GO:0008171//GO:0004719//GO:0008757	tRNA (adenine-N1-)-methyltransferase activity//methyltransferase activity//tRNA (guanine-N7-)-methyltransferase activity//endopeptidase inhibitor activity//oxidoreductase activity//RNA methyltransferase activity//O-methyltransferase activity//protein-L-isoaspartate (D-aspartate) O-methyltransferase activity//S-adenosylmethionine-dependent methyltransferase activity	GO:0031515	tRNA (m1A) methyltransferase complex	KOG1496	Malate dehydrogenase
Cluster-1007.118952	2678	--	--	--	--	K10520	ankyrin repeat and BTB/POZ domain-containing protein 1	Q5XIU1	Ankyrin repeat and BTB/POZ domain-containing protein 1 OS=Rattus norvegicus OX=10116 GN=Abtb1 PE=2 SV=1	PF13606//PF00651//PF08036//PF09798//PF00023	Ankyrin repeat//BTB/POZ domain//Diapausin family of antimicrobial peptide//DNA damage checkpoint protein//Ankyrin repeat	GO:0000077//GO:0050832	DNA damage checkpoint//defense response to fungus	GO:0005515	protein binding	GO:0005576	extracellular region	KOG0511	Ankyrin repeat protein
Cluster-1007.118953	825	--	--	--	--	--	--	--	--	PF01530	Zinc finger, C2HC type	GO:0006355	regulation of transcription, DNA-templated	GO:0008270//GO:0003700	zinc ion binding//transcription factor activity, sequence-specific DNA binding	GO:0005634//GO:0005667	nucleus//transcription factor complex	--	--
Cluster-1007.118954	447	--	--	--	--	--	--	--	--	--	--	--	--	--	--	--	--	--	--
Cluster-1007.118955	844	--	--	LC027302.1	Haliotis diversicolor genomic DNA, BAC clone: 002_c2	--	--	--	--	--	--	--	--	--	--	--	--	--	--
Cluster-1007.118956	451	--	--	LC027297.1	Haliotis diversicolor genomic DNA, BAC clone: 001_rep_c980	--	--	--	--	--	--	--	--	--	--	--	--	--	--
Cluster-1007.118957	477	--	--	--	--	--	--	--	--	--	--	--	--	--	--	--	--	--	--
Cluster-46171.0	826	--	--	JQ867475.1	Haliotis rufescens microsatellite Hr14 sequence	--	--	--	--	--	--	--	--	--	--	--	--	--	--
Cluster-14638.0	465	--	--	--	--	--	--	--	--	--	--	--	--	--	--	--	--	--	--
Cluster-4305.1	692	--	--	XM_008371088.2	PREDICTED: Malus x domestica protein EARLY RESPONSIVE TO DEHYDRATION 15-like (LOC103432879), mRNA	--	--	Q39096	Protein EARLY RESPONSIVE TO DEHYDRATION 15 OS=Arabidopsis thaliana OX=3702 GN=ERD15 PE=1 SV=1	--	--	--	--	--	--	--	--	--	--
Cluster-4305.0	701	--	--	XM_008376199.2	PREDICTED: Malus x domestica protein EARLY RESPONSIVE TO DEHYDRATION 15-like (LOC103437701), mRNA	--	--	Q39096	Protein EARLY RESPONSIVE TO DEHYDRATION 15 OS=Arabidopsis thaliana OX=3702 GN=ERD15 PE=1 SV=1	PF02333	Phytase	--	--	GO:0016158	3-phytase activity	--	--	--	--
Cluster-42187.5	304	--	--	--	--	--	--	--	--	--	--	--	--	--	--	--	--	--	--
Cluster-34501.0	841	--	--	--	--	--	--	--	--	--	--	--	--	--	--	--	--	--	--
Cluster-34992.2	772	--	--	--	--	--	--	--	--	PF02165	Wilm's tumour protein	GO:0006355	regulation of transcription, DNA-templated	--	--	GO:0005634	nucleus	--	--
Cluster-35453.0	1077	--	--	LC027305.1	Haliotis diversicolor genomic DNA, BAC clone: 002_c5	--	--	--	--	PF16752	Tubulin-specific chaperone C N-terminal domain	--	--	GO:0015631	tubulin binding	GO:0045298	tubulin complex	--	--
Cluster-189.0	476	--	--	--	--	--	--	--	--	--	--	--	--	--	--	--	--	--	--
Cluster-34992.0	1474	--	--	--	--	--	--	Q80V70	Multiple epidermal growth factor-like domains protein 6 OS=Mus musculus OX=10090 GN=Megf6 PE=2 SV=3	--	--	--	--	--	--	--	--	--	--
Cluster-37841.1	402	--	--	--	--	--	--	--	--	--	--	--	--	--	--	--	--	--	--
Cluster-37841.0	228	--	--	--	--	--	--	--	--	--	--	--	--	--	--	--	--	--	--
Cluster-37576.0	932	--	--	LC027294.1	Haliotis diversicolor genomic DNA, BAC clone: 001_rep_c977	--	--	--	--	--	--	--	--	--	--	--	--	--	--
Cluster-42257.1	1392	--	--	--	--	--	--	--	--	--	--	--	--	--	--	--	--	--	--
Cluster-42187.3	399	--	--	--	--	--	--	--	--	PF02880	Phosphoglucomutase/phosphomannomutase, alpha/beta/alpha domain III	GO:0005975	carbohydrate metabolic process	GO:0016868	intramolecular transferase activity, phosphotransferases	--	--	--	--
Cluster-1007.62722	1292	--	--	--	--	--	--	--	--	--	--	--	--	--	--	--	--	--	--
Cluster-1007.62723	2750	--	--	XM_017485206.1	PREDICTED: Ictalurus punctatus solute carrier family 39 member 7 (slc39a7), mRNA	K14713	solute carrier family 39 (zinc transporter), member 7	Q9V3A4	Protein catecholamines up OS=Drosophila melanogaster OX=7227 GN=Catsup PE=2 SV=1	PF02535//PF17052	ZIP Zinc transporter//Cap associated factor	GO:0017148//GO:0030001//GO:0055085//GO:0006413	negative regulation of translation//metal ion transport//transmembrane transport//translational initiation	GO:0046873	metal ion transmembrane transporter activity	GO:0016020//GO:0005845	membrane//mRNA cap binding complex	KOG2693	Putative zinc transporter
Cluster-1007.62720	1130	--	--	--	--	--	--	--	--	--	--	--	--	--	--	--	--	--	--
Cluster-1007.62721	1742	--	--	--	--	--	--	--	--	--	--	--	--	--	--	--	--	--	--
Cluster-1007.12938	1946	--	--	GQ368253.1	Haliotis discus hannai L-gulono-gamma-lactone oxidase (GLO) mRNA, complete cds	K00103	L-gulonolactone oxidase	Q90YK3	L-gulonolactone oxidase OS=Scyliorhinus torazame OX=75743 GN=GULO PE=2 SV=1	PF04030//PF01565	D-arabinono-1,4-lactone oxidase//FAD binding domain	GO:0055114	oxidation-reduction process	GO:0016491//GO:0050660//GO:0003885	oxidoreductase activity//flavin adenine dinucleotide binding//D-arabinono-1,4-lactone oxidase activity	GO:0016020	membrane	KOG4730	D-arabinono-1, 4-lactone oxidase
Cluster-1007.62727	8945	--	--	XM_022446147.1	PREDICTED: Crassostrea virginica dynein heavy chain 12, axonemal-like (LOC111109885), transcript variant X6, mRNA	K10408	dynein heavy chain, axonemal	Q63170	Dynein heavy chain 7, axonemal OS=Rattus norvegicus OX=10116 GN=Dnah7 PE=2 SV=2	PF00004//PF07728//PF00158//PF04513//PF05083//PF03028//PF08785//PF00564	ATPase family associated with various cellular activities (AAA)//AAA domain (dynein-related subfamily)//Sigma-54 interaction domain//Baculovirus polyhedron envelope protein, PEP, C terminus//LST-1 protein//Dynein heavy chain and region D6 of dynein motor//Ku C terminal domain like//PB1 domain	GO:0007017//GO:0006955//GO:0000902//GO:0007018//GO:0006355	microtubule-based process//immune response//cell morphogenesis//microtubule-based movement//regulation of transcription, DNA-templated	GO:0016887//GO:0016817//GO:0005198//GO:0005524//GO:0008134//GO:0005515//GO:0003777	ATPase activity//hydrolase activity, acting on acid anhydrides//structural molecule activity//ATP binding//transcription factor binding//protein binding//microtubule motor activity	GO:0030286//GO:0019031//GO:0005667//GO:0005874//GO:0019028//GO:0016020	dynein complex//viral envelope//transcription factor complex//microtubule//viral capsid//membrane	--	--
Cluster-1007.62724	2715	--	--	XM_017485206.1	PREDICTED: Ictalurus punctatus solute carrier family 39 member 7 (slc39a7), mRNA	K14713	solute carrier family 39 (zinc transporter), member 7	Q9V3A4	Protein catecholamines up OS=Drosophila melanogaster OX=7227 GN=Catsup PE=2 SV=1	PF17052//PF02535	Cap associated factor//ZIP Zinc transporter	GO:0006413//GO:0017148//GO:0030001//GO:0055085	translational initiation//negative regulation of translation//metal ion transport//transmembrane transport	GO:0046873	metal ion transmembrane transporter activity	GO:0005845//GO:0016020	mRNA cap binding complex//membrane	KOG2693	Putative zinc transporter
Cluster-1007.62725	789	--	--	LC027294.1	Haliotis diversicolor genomic DNA, BAC clone: 001_rep_c977	--	--	--	--	--	--	--	--	--	--	--	--	--	--
Cluster-19738.0	470	--	--	--	--	--	--	--	--	--	--	--	--	--	--	--	--	--	--
Cluster-1007.12935	222	--	--	--	--	--	--	--	--	--	--	--	--	--	--	--	--	--	--
Cluster-1007.62728	1740	--	--	--	--	--	--	--	--	--	--	--	--	--	--	--	--	--	--
Cluster-1007.62729	1128	--	--	--	--	--	--	--	--	PF00622	SPRY domain	--	--	GO:0005515	protein binding	--	--	--	--
Cluster-1007.12930	280	--	--	--	--	--	--	--	--	--	--	--	--	--	--	--	--	--	--
Cluster-8330.0	1144	--	--	LC027332.1	Haliotis diversicolor genomic DNA, BAC clone: 004_rep_c861	--	--	--	--	--	--	--	--	--	--	--	--	--	--
Cluster-1007.12932	359	--	--	--	--	--	--	--	--	--	--	--	--	--	--	--	--	--	--
Cluster-1007.12933	1737	--	--	GQ368253.1	Haliotis discus hannai L-gulono-gamma-lactone oxidase (GLO) mRNA, complete cds	K00103	L-gulonolactone oxidase	Q90YK3	L-gulonolactone oxidase OS=Scyliorhinus torazame OX=75743 GN=GULO PE=2 SV=1	PF04030//PF07710	D-arabinono-1,4-lactone oxidase//P53 tetramerisation motif	GO:0051262//GO:0055114	protein tetramerization//oxidation-reduction process	GO:0003885	D-arabinono-1,4-lactone oxidase activity	GO:0016020	membrane	KOG4730	D-arabinono-1, 4-lactone oxidase
Cluster-2426.0	673	--	--	--	--	--	--	--	--	--	--	--	--	--	--	--	--	--	--
Cluster-32697.0	1124	--	--	--	--	--	--	--	--	--	--	--	--	--	--	--	--	--	--
Cluster-31384.0	1302	--	--	--	--	--	--	--	--	PF00096	Zinc finger, C2H2 type	--	--	GO:0046872	metal ion binding	--	--	--	--
Cluster-5848.0	1274	--	--	XM_008390181.2	PREDICTED: Malus x domestica 2,3-bisphosphoglycerate-independent phosphoglycerate mutase (LOC103450793), mRNA	--	--	Q42908	2,3-bisphosphoglycerate-independent phosphoglycerate mutase OS=Mesembryanthemum crystallinum OX=3544 GN=PGM1 PE=2 SV=1	PF01676//PF06415	Metalloenzyme superfamily//BPG-independent PGAM N-terminus (iPGM_N)	GO:0006096//GO:0006094//GO:0006007	glycolytic process//gluconeogenesis//glucose catabolic process	GO:0030145//GO:0003824//GO:0004619//GO:0046872	manganese ion binding//catalytic activity//phosphoglycerate mutase activity//metal ion binding	GO:0005737	cytoplasm	KOG4513	Phosphoglycerate mutase
Cluster-1007.138079	645	--	--	LC027339.1	Haliotis diversicolor genomic DNA, BAC clone: 006_rep_c2411	--	--	--	--	--	--	--	--	--	--	--	--	--	--
Cluster-1007.138078	1666	--	--	--	--	--	--	Q5F478	Serine/threonine-protein phosphatase 6 regulatory ankyrin repeat subunit B OS=Gallus gallus OX=9031 GN=ANKRD44 PE=2 SV=1	PF13606//PF00023	Ankyrin repeat//Ankyrin repeat	--	--	GO:0005515	protein binding	--	--	KOG4177	Ankyrin
Cluster-1007.138075	724	--	--	--	--	--	--	--	--	--	--	--	--	--	--	--	--	--	--
Cluster-1007.138074	2017	--	--	--	--	--	--	--	--	--	--	--	--	--	--	--	--	--	--
Cluster-1007.138077	932	--	--	--	--	--	--	Q6T938	Acidic fibroblast growth factor intracellular-binding protein B OS=Danio rerio OX=7955 GN=fibpb PE=1 SV=1	PF06389	Filovirus membrane-associated protein VP24	GO:0016032	viral process	GO:0005198	structural molecule activity	GO:0016020	membrane	--	--
Cluster-1007.138076	445	--	--	--	--	--	--	--	--	--	--	--	--	--	--	--	--	--	--
Cluster-1007.138071	875	--	--	--	--	--	--	Q9M9F9	Interactor of constitutive active ROPs 4 OS=Arabidopsis thaliana OX=3702 GN=ICR4 PE=1 SV=2	PF00643//PF01920//PF02185//PF16331//PF04977//PF10473//PF09726//PF03938//PF14634//PF04111//PF16326//PF05791//PF01496//PF07926//PF02601//PF00097//PF08941//PF04632//PF00170//PF01025//PF04888//PF05929//PF02050//PF13851//PF06810	B-box zinc finger//Prefoldin subunit//Hr1 repeat//TolA binding protein trimerisation//Septum formation initiator//Leucine-rich repeats of kinetochore protein Cenp-F/LEK1//Transmembrane protein//Outer membrane protein (OmpH-like)//zinc-RING finger domain//Autophagy protein Apg6//ABC transporter C-terminal domain//Bacillus haemolytic enterotoxin (HBL)//V-type ATPase 116kDa subunit family//TPR/MLP1/…	GO:0015991//GO:0007049//GO:0009405//GO:0007165//GO:0006457//GO:0071973//GO:0006606//GO:0070206//GO:0006308//GO:0015992//GO:0006355//GO:0006935//GO:0019069//GO:0006914//GO:0048870//GO:0016567//GO:0006810	ATP hydrolysis coupled proton transport//cell cycle//pathogenesis//signal transduction//protein folding//bacterial-type flagellum-dependent cell motility//protein import into nucleus//protein trimerization//DNA catabolic process//proton transport//regulation of transcription, DNA-templated//chemotaxis//viral capsid assembly//autophagy//cell motility//protein ubiquitination//transport	GO:0031386//GO:0016881//GO:0046872//GO:0005515//GO:0003700//GO:0008270//GO:0015078//GO:0008855//GO:0051087//GO:0005198//GO:0000774//GO:0008134//GO:0045502//GO:0051082//GO:0003677//GO:0003774//GO:0043565//GO:0042803	protein tag//acid-amino acid ligase activity//metal ion binding//protein binding//transcription factor activity, sequence-specific DNA binding//zinc ion binding//hydrogen ion transmembrane transporter activity//exodeoxyribonuclease VII activity//chaperone binding//structural molecule activity//adenyl-nucleotide exchange factor activity//transcription factor binding//dynein binding//unfolded prote…	GO:0031514//GO:0005622//GO:0016020//GO:0009288//GO:0030286//GO:0033179//GO:0009318//GO:0005667//GO:0005886//GO:0016021//GO:0016272	motile cilium//intracellular//membrane//bacterial-type flagellum//dynein complex//proton-transporting V-type ATPase, V0 domain//exodeoxyribonuclease VII complex//transcription factor complex//plasma membrane//integral component of membrane//prefoldin complex	--	--
Cluster-1007.138070	853	--	--	--	--	--	--	--	--	PF01025//PF00619	GrpE//Caspase recruitment domain	GO:0006457//GO:0042981	protein folding//regulation of apoptotic process	GO:0042803//GO:0051087//GO:0000774	protein homodimerization activity//chaperone binding//adenyl-nucleotide exchange factor activity	--	--	--	--
Cluster-1007.138073	3255	--	--	--	--	--	--	Q2M1V0	Intestine-specific homeobox OS=Homo sapiens OX=9606 GN=ISX PE=1 SV=2	PF05920//PF00046	Homeobox KN domain//Homeobox domain	GO:0006355	regulation of transcription, DNA-templated	GO:0003677	DNA binding	--	--	--	--
Cluster-1007.138072	350	--	--	--	--	--	--	--	--	--	--	--	--	--	--	--	--	--	--
Cluster-1007.67761	694	--	--	LC027336.1	Haliotis diversicolor genomic DNA, BAC clone: 005_rep_c27301	--	--	--	--	--	--	--	--	--	--	--	--	--	--
Cluster-24491.0	1719	--	--	--	--	--	--	--	--	--	--	--	--	--	--	--	--	--	--
Cluster-1007.67760	289	--	--	LC027336.1	Haliotis diversicolor genomic DNA, BAC clone: 005_rep_c27301	--	--	--	--	--	--	--	--	--	--	--	--	--	--
Cluster-1007.67763	1480	--	--	--	--	--	--	--	--	--	--	--	--	--	--	--	--	--	--
Cluster-26777.0	451	--	--	HM590398.1	Antheraea yamamai ribosomal protein S15A (RpS15a) mRNA, complete cds	K02957	small subunit ribosomal protein S15Ae	P48149	40S ribosomal protein S15Aa OS=Drosophila melanogaster OX=7227 GN=RpS15Aa PE=1 SV=2	PF00410	Ribosomal protein S8	GO:0042254//GO:0006412	ribosome biogenesis//translation	GO:0003735	structural constituent of ribosome	GO:0005840	ribosome	KOG1754	40S ribosomal protein S15/S22
Cluster-1007.100991	3422	--	--	AY952213.1	Haliotis fulgens clone Hful1136 microsatellite sequence	--	--	Q8BZ20	Poly [ADP-ribose] polymerase 12 OS=Mus musculus OX=10090 GN=Parp12 PE=1 SV=3	PF00644//PF04648	Poly(ADP-ribose) polymerase catalytic domain//Yeast mating factor alpha hormone	GO:0019953//GO:0007165	sexual reproduction//signal transduction	GO:0003950//GO:0000772	NAD+ ADP-ribosyltransferase activity//mating pheromone activity	GO:0005576	extracellular region	--	--
Cluster-1007.100990	3012	--	--	--	--	--	--	--	--	PF01108	Tissue factor	--	--	GO:0005515	protein binding	--	--	--	--
Cluster-1007.100993	676	--	--	--	--	--	--	--	--	--	--	--	--	--	--	--	--	--	--
Cluster-1007.100992	376	--	--	--	--	--	--	--	--	--	--	--	--	--	--	--	--	--	--
Cluster-1007.100995	392	--	--	FO538765.1	Magnetospira sp. QH-2 chromosome, complete genome	K01676	fumarate hydratase, class I	Q8X4P8	Fumarate hydratase class I, aerobic OS=Escherichia coli O157:H7 OX=83334 GN=fumA PE=3 SV=3	PF05681	Fumarate hydratase (Fumerase)	--	--	GO:0016829	lyase activity	--	--	--	--
Cluster-1007.100994	2601	--	--	XM_021483571.1	PREDICTED: Mizuhopecten yessoensis fumarate hydratase class I, aerobic-like (LOC110440468), mRNA	K01676	fumarate hydratase, class I	P40720	Fumarate hydratase class I, aerobic OS=Salmonella typhimurium (strain LT2 / SGSC1412 / ATCC 700720) OX=99287 GN=fumA PE=3 SV=3	PF09213//PF05681//PF17070//PF05683	M3//Fumarate hydratase (Fumerase)//30S ribosomal protein Thx//Fumarase C-terminus	--	--	GO:0019956//GO:0016836//GO:0016829	chemokine binding//hydro-lyase activity//lyase activity	GO:0005840	ribosome	--	--
Cluster-1007.100997	3749	--	--	XM_020074956.1	PREDICTED: Crassostrea gigas diacylglycerol kinase beta (LOC105347404), transcript variant X2, mRNA	K00901	diacylglycerol kinase (ATP)	Q6NS52	Diacylglycerol kinase beta OS=Mus musculus OX=10090 GN=Dgkb PE=1 SV=2	PF00130//PF00628//PF00609//PF00036//PF13833//PF13202//PF13499//PF13405//PF10591//PF07649//PF00781	Phorbol esters/diacylglycerol binding domain (C1 domain)//PHD-finger//Diacylglycerol kinase accessory domain//EF hand//EF-hand domain pair//EF hand//EF-hand domain pair//EF-hand domain//Secreted protein acidic and rich in cysteine Ca binding region//C1-like domain//Diacylglycerol kinase catalytic domain	GO:0007205//GO:0035556//GO:0009395//GO:0046486//GO:0055114//GO:0007165	protein kinase C-activating G-protein coupled receptor signaling pathway//intracellular signal transduction//phospholipid catabolic process//glycerolipid metabolic process//oxidation-reduction process//signal transduction	GO:0016301//GO:0005509//GO:0005515//GO:0004143//GO:0047134	kinase activity//calcium ion binding//protein binding//diacylglycerol kinase activity//protein-disulfide reductase activity	GO:0005578	proteinaceous extracellular matrix	KOG1169	Diacylglycerol kinase
Cluster-1007.100996	1136	--	--	--	--	--	--	--	--	--	--	--	--	--	--	--	--	--	--
Cluster-1007.100999	474	--	--	--	--	--	--	--	--	--	--	--	--	--	--	--	--	--	--
Cluster-1007.100998	477	--	--	--	--	--	--	--	--	--	--	--	--	--	--	--	--	--	--
Cluster-18309.1	345	--	--	--	--	--	--	--	--	--	--	--	--	--	--	--	--	--	--
Cluster-1007.67764	1681	--	--	LC027344.1	Haliotis diversicolor genomic DNA, BAC clone: 006_rep_c2416	--	--	--	--	--	--	--	--	--	--	--	--	--	--
Cluster-23534.0	724	--	--	--	--	--	--	--	--	--	--	--	--	--	--	--	--	--	--
Cluster-20463.0	825	--	--	--	--	K08630	a disintegrin and metalloproteinase with thrombospondin motifs 16	Q8TE57	A disintegrin and metalloproteinase with thrombospondin motifs 16 OS=Homo sapiens OX=9606 GN=ADAMTS16 PE=2 SV=3	PF01607//PF03823	Chitin binding Peritrophin-A domain//Neurokinin B	GO:0006030//GO:0007217	chitin metabolic process//tachykinin receptor signaling pathway	GO:0008061	chitin binding	GO:0005576	extracellular region	--	--
Cluster-1007.67767	1988	--	--	--	--	--	--	--	--	PF02148	Zn-finger in ubiquitin-hydrolases and other protein	--	--	GO:0008270	zinc ion binding	--	--	--	--
Cluster-1007.20283	1656	--	--	--	--	--	--	--	--	--	--	--	--	--	--	--	--	--	--
Cluster-1007.57291	211	--	--	--	--	--	--	--	--	--	--	--	--	--	--	--	--	--	--
Cluster-47133.0	1581	--	--	--	--	--	--	--	--	--	--	--	--	--	--	--	--	--	--
Cluster-1007.20282	1643	--	--	--	--	--	--	--	--	--	--	--	--	--	--	--	--	--	--
Cluster-1007.20281	745	--	--	--	--	--	--	--	--	--	--	--	--	--	--	--	--	--	--
Cluster-1007.20280	1643	--	--	--	--	--	--	--	--	--	--	--	--	--	--	--	--	--	--
Cluster-37186.0	2331	--	--	LC027294.1	Haliotis diversicolor genomic DNA, BAC clone: 001_rep_c977	--	--	--	--	PF00985//PF02137	Merozoite Surface Antigen 2 (MSA-2) family//Adenosine-deaminase (editase) domain	GO:0006807//GO:0007155//GO:0006396//GO:0006144	nitrogen compound metabolic process//cell adhesion//RNA processing//purine nucleobase metabolic process	GO:0003723//GO:0004000	RNA binding//adenosine deaminase activity	--	--	--	--
Cluster-23262.0	1905	--	--	KT895223.1	Haliotis discus hannai metallothionein (MT) gene, complete cds	--	--	--	--	--	--	--	--	--	--	--	--	--	--
Cluster-29484.0	1273	--	--	--	--	--	--	--	--	--	--	--	--	--	--	--	--	--	--
Cluster-15422.1	295	--	--	--	--	--	--	--	--	--	--	--	--	--	--	--	--	--	--
Cluster-1007.129200	292	--	--	--	--	--	--	--	--	PF04083	Partial alpha/beta-hydrolase lipase region	GO:0006629	lipid metabolic process	--	--	--	--	--	--
Cluster-1007.19409	1644	--	--	LC027340.1	Haliotis diversicolor genomic DNA, BAC clone: 006_rep_c2412	--	--	Q2PE14	Zinc finger CCHC domain-containing protein 8 homolog OS=Drosophila melanogaster OX=7227 GN=CG4622 PE=1 SV=2	--	--	--	--	--	--	--	--	--	--
Cluster-1007.139388	1206	--	--	--	--	--	--	--	--	--	--	--	--	--	--	--	--	--	--
Cluster-1007.139389	1094	--	--	--	--	K10858	DNA mismatch repair protein PMS2	P54279	Mismatch repair endonuclease PMS2 OS=Mus musculus OX=10090 GN=Pms2 PE=2 SV=1	PF08290	Hepatitis core protein, putative zinc finger	GO:0009405	pathogenesis	GO:0005198	structural molecule activity	--	--	KOG1978	DNA mismatch repair protein - MLH2/PMS1/Pms2 family
Cluster-1007.139384	822	--	--	--	--	--	--	--	--	--	--	--	--	--	--	--	--	--	--
Cluster-1007.139385	247	--	--	--	--	--	--	--	--	--	--	--	--	--	--	--	--	--	--
Cluster-1007.139386	349	--	--	--	--	--	--	--	--	--	--	--	--	--	--	--	--	--	--
Cluster-1007.139387	292	--	--	--	--	--	--	--	--	--	--	--	--	--	--	--	--	--	--
Cluster-1007.139380	1197	--	--	LC027302.1	Haliotis diversicolor genomic DNA, BAC clone: 002_c2	--	--	--	--	--	--	--	--	--	--	--	--	--	--
Cluster-1007.139381	743	--	--	LC027308.1	Haliotis diversicolor genomic DNA, BAC clone: 002_c8	--	--	--	--	--	--	--	--	--	--	--	--	--	--
Cluster-1007.139382	221	--	--	LC027302.1	Haliotis diversicolor genomic DNA, BAC clone: 002_c2	--	--	--	--	--	--	--	--	--	--	--	--	--	--
Cluster-1007.139383	839	--	--	LC027308.1	Haliotis diversicolor genomic DNA, BAC clone: 002_c8	--	--	--	--	--	--	--	--	--	--	--	--	--	--
Cluster-1007.10792	346	--	--	--	--	--	--	--	--	--	--	--	--	--	--	--	--	--	--
Cluster-1007.10793	553	--	--	LC027327.1	Haliotis diversicolor genomic DNA, BAC clone: 003_rep_c699	--	--	--	--	--	--	--	--	--	--	--	--	--	--
Cluster-1007.10790	1167	--	--	--	--	--	--	Q6P5F9	Exportin-1 OS=Mus musculus OX=10090 GN=Xpo1 PE=1 SV=1	--	--	--	--	--	--	--	--	--	--
Cluster-1007.10791	213	--	--	LC027340.1	Haliotis diversicolor genomic DNA, BAC clone: 006_rep_c2412	--	--	--	--	--	--	--	--	--	--	--	--	--	--
Cluster-1007.10796	2342	--	--	LC027310.1	Haliotis diversicolor genomic DNA, BAC clone: 002_c10	--	--	--	--	PF08290	Hepatitis core protein, putative zinc finger	GO:0009405	pathogenesis	GO:0005198	structural molecule activity	--	--	--	--
Cluster-1007.10797	1333	--	--	LC027344.1	Haliotis diversicolor genomic DNA, BAC clone: 006_rep_c2416	--	--	--	--	--	--	--	--	--	--	--	--	--	--
Cluster-1007.10794	555	--	--	--	--	--	--	--	--	--	--	--	--	--	--	--	--	--	--
Cluster-1007.10795	1917	--	--	XM_002609611.1	Branchiostoma floridae hypothetical protein, mRNA	--	--	Q658Y4	Protein FAM91A1 OS=Homo sapiens OX=9606 GN=FAM91A1 PE=1 SV=3	--	--	--	--	--	--	--	--	KOG3707	Uncharacterized conserved protein
Cluster-39845.1	1706	--	--	--	--	--	--	--	--	--	--	--	--	--	--	--	--	--	--
Cluster-1007.10798	802	--	--	--	--	--	--	--	--	--	--	--	--	--	--	--	--	--	--
Cluster-1007.10799	737	--	--	XM_008339889.2	PREDICTED: Malus x domestica water stress-inducible protein Rab21-like (LOC103401165), transcript variant X1, mRNA >gi|1039865464|ref|XM_008339898.2| PREDICTED: Malus x domestica water stress-inducible protein Rab21-like (LOC103401165), transcript variant X2, mRNA	--	--	A8CVF3	Dehydrin DHN1 OS=Avicennia marina OX=82927 GN=DHN1 PE=1 SV=1	PF00257	Dehydrin	GO:0009415//GO:0006950	response to water//response to stress	--	--	--	--	--	--
Cluster-2681.0	930	--	--	AE016877.1	Bacillus cereus ATCC 14579, complete genome	--	--	O34997	Uncharacterized membrane protein YkoY OS=Bacillus subtilis (strain 168) OX=224308 GN=ykoY PE=3 SV=1	PF04689//PF03741//PF04277	DNA binding protein S1FA//Integral membrane protein TerC family//Oxaloacetate decarboxylase, gamma chain	GO:0006090//GO:0006525//GO:0006560//GO:0006814//GO:0006355//GO:0071436	pyruvate metabolic process//arginine metabolic process//proline metabolic process//sodium ion transport//regulation of transcription, DNA-templated//sodium ion export	GO:0003677//GO:0015081//GO:0008948	DNA binding//sodium ion transmembrane transporter activity//oxaloacetate decarboxylase activity	GO:0005634//GO:0016020//GO:0016021	nucleus//membrane//integral component of membrane	--	--
Cluster-1007.137571	5632	--	--	XM_013206148.1	PREDICTED: Biomphalaria glabrata voltage-dependent calcium channel type A subunit alpha-1-like (LOC106051035), mRNA	K04849	voltage-dependent calcium channel N type alpha-1B	C9D7C2	Voltage-dependent calcium channel type A subunit alpha-1 OS=Apis mellifera OX=7460 GN=CAC PE=2 SV=1	PF07645//PF00520	Calcium-binding EGF domain//Ion transport protein	GO:0006811//GO:0055085	ion transport//transmembrane transport	GO:0005216//GO:0005509	ion channel activity//calcium ion binding	GO:0016020	membrane	KOG2301	Voltage-gated Ca2+ channels, alpha1 subunits
Cluster-1007.137570	294	--	--	--	--	--	--	--	--	--	--	--	--	--	--	--	--	--	--
Cluster-1007.137573	612	--	--	--	--	--	--	--	--	PF13895	Immunoglobulin domain	--	--	GO:0005515	protein binding	--	--	--	--
Cluster-1007.137572	252	--	--	--	--	--	--	--	--	--	--	--	--	--	--	--	--	--	--
Cluster-1007.137575	2200	--	--	--	--	--	--	--	--	--	--	--	--	--	--	--	--	--	--
Cluster-1007.137574	759	--	--	--	--	--	--	--	--	--	--	--	--	--	--	--	--	--	--
Cluster-1007.137577	400	--	--	--	--	--	--	--	--	--	--	--	--	--	--	--	--	--	--
Cluster-1007.137576	578	--	--	--	--	--	--	--	--	--	--	--	--	--	--	--	--	--	--
Cluster-1007.137579	401	--	--	D83984.1	Haliotis diversicolor gene for IDO-like myoglobin, complete cds	--	--	--	--	PF00515	Tetratricopeptide repeat	--	--	GO:0005515	protein binding	--	--	--	--
Cluster-1007.137578	2855	--	--	LC027358.1	Haliotis diversicolor genomic DNA, BAC clone: 009_rep_c2377	--	--	--	--	--	--	--	--	--	--	--	--	--	--
Cluster-37403.0	1082	--	--	--	--	--	--	--	--	--	--	--	--	--	--	--	--	--	--
Cluster-1007.93269	4652	--	--	--	--	K13137	serine-threonine kinase receptor-associated protein	Q5ZL33	Serine-threonine kinase receptor-associated protein OS=Gallus gallus OX=9031 GN=STRAP PE=2 SV=2	PF00400//PF16685	WD domain, G-beta repeat//zinc RING finger of MSL2	--	--	GO:0061630//GO:0005515	ubiquitin protein ligase activity//protein binding	--	--	KOG0643	Translation initiation factor 3, subunit i (eIF-3i)/TGF-beta receptor-interacting protein (TRIP-1)
Cluster-1007.93268	1752	--	--	--	--	--	--	--	--	--	--	--	--	--	--	--	--	--	--
Cluster-16091.0	583	--	--	LC027294.1	Haliotis diversicolor genomic DNA, BAC clone: 001_rep_c977	--	--	--	--	--	--	--	--	--	--	--	--	--	--
Cluster-27868.0	1455	--	--	--	--	--	--	--	--	PF02522//PF01607	Aminoglycoside 3-N-acetyltransferase//Chitin binding Peritrophin-A domain	GO:0046677//GO:0042967//GO:0006030	response to antibiotic//acyl-carrier-protein biosynthetic process//chitin metabolic process	GO:0008061//GO:0046353	chitin binding//aminoglycoside 3-N-acetyltransferase activity	GO:0005576	extracellular region	--	--
Cluster-1007.93263	446	--	--	--	--	--	--	--	--	--	--	--	--	--	--	--	--	--	--
Cluster-1007.93262	2446	--	--	LC027310.1	Haliotis diversicolor genomic DNA, BAC clone: 002_c10	K17795	mitochondrial import inner membrane translocase subunit TIM17	Q99595	Mitochondrial import inner membrane translocase subunit Tim17-A OS=Homo sapiens OX=9606 GN=TIMM17A PE=1 SV=1	--	--	--	--	--	--	--	--	KOG1652	Mitochondrial import inner membrane translocase, subunit TIM17
Cluster-1007.93261	1176	--	--	LC027332.1	Haliotis diversicolor genomic DNA, BAC clone: 004_rep_c861	--	--	--	--	--	--	--	--	--	--	--	--	--	--
Cluster-1007.93260	348	--	--	GQ259890.1	Haliotis asinina vasa-like protein mRNA, complete cds	--	--	--	--	PF00098	Zinc knuckle	--	--	GO:0008270//GO:0003676	zinc ion binding//nucleic acid binding	--	--	--	--
Cluster-1007.93267	337	--	--	--	--	--	--	--	--	PF09162	Tap, RNA-binding	GO:0006406	mRNA export from nucleus	GO:0003723	RNA binding	GO:0005737//GO:0005634	cytoplasm//nucleus	--	--
Cluster-1007.93266	1878	--	--	--	--	--	--	--	--	--	--	--	--	--	--	--	--	--	--
Cluster-1007.93265	276	--	--	LC027358.1	Haliotis diversicolor genomic DNA, BAC clone: 009_rep_c2377	--	--	--	--	--	--	--	--	--	--	--	--	--	--
Cluster-1007.93264	1042	--	--	LC027339.1	Haliotis diversicolor genomic DNA, BAC clone: 006_rep_c2411	--	--	--	--	PF15234//PF10468	Linker for activation of T-cells//Carboxypeptidase inhibitor I68	GO:0010951//GO:0007165//GO:0007596	negative regulation of endopeptidase activity//signal transduction//blood coagulation	GO:0008191	metalloendopeptidase inhibitor activity	GO:0016020	membrane	--	--
Cluster-15551.1	1789	--	--	M99061.1	Homo sapiens epidermal cytokeratin 2 mRNA, complete cds	K07605	type II keratin, basic	Q6EIZ1	Keratin, type II cytoskeletal 2 epidermal OS=Canis lupus familiaris OX=9615 GN=KRT2 PE=2 SV=1	PF02050//PF05130//PF01166//PF06657//PF10473//PF07926//PF08074//PF08651//PF04513//PF00038//PF05773//PF08702	Flagellar FliJ protein//FlgN protein//TSC-22/dip/bun family//Centrosome microtubule-binding domain of Cep57//Leucine-rich repeats of kinetochore protein Cenp-F/LEK1//TPR/MLP1/MLP2-like protein//CHDCT2 (NUC038) domain//DASH complex subunit Duo1//Baculovirus polyhedron envelope protein, PEP, C terminus//Intermediate filament protein//RWD domain//Fibrinogen alpha/beta chain family	GO:0006355//GO:0006935//GO:0030168//GO:0051258//GO:0007067//GO:0007165//GO:0071973//GO:0006606//GO:0044780	regulation of transcription, DNA-templated//chemotaxis//platelet activation//protein polymerization//mitotic nuclear division//signal transduction//bacterial-type flagellum-dependent cell motility//protein import into nucleus//bacterial-type flagellum assembly	GO:0005102//GO:0008134//GO:0005524//GO:0008017//GO:0016818//GO:0045502//GO:0003677//GO:0003774//GO:0042803//GO:0030674//GO:0005515//GO:0003700//GO:0008270//GO:0005198	receptor binding//transcription factor binding//ATP binding//microtubule binding//hydrolase activity, acting on acid anhydrides, in phosphorus-containing anhydrides//dynein binding//DNA binding//motor activity//protein homodimerization activity//protein binding, bridging//protein binding//transcription factor activity, sequence-specific DNA binding//zinc ion binding//structural molecule activity	GO:0005667//GO:0005577//GO:0005634//GO:0042729//GO:0019031//GO:0016020//GO:0009288//GO:0019028//GO:0030286//GO:0072686//GO:0005882//GO:0045298	transcription factor complex//fibrinogen complex//nucleus//DASH complex//viral envelope//membrane//bacterial-type flagellum//viral capsid//dynein complex//mitotic spindle//intermediate filament//tubulin complex	--	--
Cluster-15551.0	1936	--	--	M99061.1	Homo sapiens epidermal cytokeratin 2 mRNA, complete cds	K07605	type II keratin, basic	Q6EIZ1	Keratin, type II cytoskeletal 2 epidermal OS=Canis lupus familiaris OX=9615 GN=KRT2 PE=2 SV=1	PF04513//PF02421//PF08651//PF08074//PF08702//PF05773//PF02874//PF00038//PF05130//PF02050//PF07926//PF10473//PF06657	Baculovirus polyhedron envelope protein, PEP, C terminus//Ferrous iron transport protein B//DASH complex subunit Duo1//CHDCT2 (NUC038) domain//Fibrinogen alpha/beta chain family//RWD domain//ATP synthase alpha/beta family, beta-barrel domain//Intermediate filament protein//FlgN protein//Flagellar FliJ protein//TPR/MLP1/MLP2-like protein//Leucine-rich repeats of kinetochore protein Cenp-F/LEK1//Ce…	GO:0015684//GO:0046034//GO:0007165//GO:0007067//GO:0071973//GO:0006606//GO:0044780//GO:0015992//GO:0006355//GO:0006935//GO:0030168//GO:0051258	ferrous iron transport//ATP metabolic process//signal transduction//mitotic nuclear division//bacterial-type flagellum-dependent cell motility//protein import into nucleus//bacterial-type flagellum assembly//proton transport//regulation of transcription, DNA-templated//chemotaxis//platelet activation//protein polymerization	GO:0005515//GO:0015093//GO:0008270//GO:0005198//GO:0005524//GO:0008134//GO:0005102//GO:0005525//GO:0045502//GO:0003774//GO:0003677//GO:0008017//GO:0016818//GO:0030674//GO:0042803	protein binding//ferrous iron transmembrane transporter activity//zinc ion binding//structural molecule activity//ATP binding//transcription factor binding//receptor binding//GTP binding//dynein binding//motor activity//DNA binding//microtubule binding//hydrolase activity, acting on acid anhydrides, in phosphorus-containing anhydrides//protein binding, bridging//protein homodimerization activity	GO:0019028//GO:0009288//GO:0016020//GO:0072686//GO:0005882//GO:0030286//GO:0045298//GO:0005667//GO:0005577//GO:0016021//GO:0005634//GO:0042729//GO:0019031	viral capsid//bacterial-type flagellum//membrane//mitotic spindle//intermediate filament//dynein complex//tubulin complex//transcription factor complex//fibrinogen complex//integral component of membrane//nucleus//DASH complex//viral envelope	--	--
Cluster-15551.3	2437	--	--	NM_000423.2	Homo sapiens keratin 2 (KRT2), mRNA	K07605	type II keratin, basic	Q6EIZ1	Keratin, type II cytoskeletal 2 epidermal OS=Canis lupus familiaris OX=9615 GN=KRT2 PE=2 SV=1	PF05130//PF02050//PF07926//PF06657//PF10473//PF08074//PF04513//PF08651//PF02874//PF05773//PF08702//PF00038	FlgN protein//Flagellar FliJ protein//TPR/MLP1/MLP2-like protein//Centrosome microtubule-binding domain of Cep57//Leucine-rich repeats of kinetochore protein Cenp-F/LEK1//CHDCT2 (NUC038) domain//Baculovirus polyhedron envelope protein, PEP, C terminus//DASH complex subunit Duo1//ATP synthase alpha/beta family, beta-barrel domain//RWD domain//Fibrinogen alpha/beta chain family//Intermediate filame…	GO:0006606//GO:0044780//GO:0007165//GO:0007067//GO:0046034//GO:0071973//GO:0051258//GO:0006355//GO:0006935//GO:0015992//GO:0030168	protein import into nucleus//bacterial-type flagellum assembly//signal transduction//mitotic nuclear division//ATP metabolic process//bacterial-type flagellum-dependent cell motility//protein polymerization//regulation of transcription, DNA-templated//chemotaxis//proton transport//platelet activation	GO:0008270//GO:0005198//GO:0005515//GO:0030674//GO:0042803//GO:0005102//GO:0008134//GO:0005524//GO:0008017//GO:0016818//GO:0045502//GO:0003774//GO:0003677	zinc ion binding//structural molecule activity//protein binding//protein binding, bridging//protein homodimerization activity//receptor binding//transcription factor binding//ATP binding//microtubule binding//hydrolase activity, acting on acid anhydrides, in phosphorus-containing anhydrides//dynein binding//motor activity//DNA binding	GO:0030286//GO:0005882//GO:0072686//GO:0045298//GO:0016020//GO:0009288//GO:0019028//GO:0042729//GO:0019031//GO:0005667//GO:0005577//GO:0005634	dynein complex//intermediate filament//mitotic spindle//tubulin complex//membrane//bacterial-type flagellum//viral capsid//DASH complex//viral envelope//transcription factor complex//fibrinogen complex//nucleus	--	--
Cluster-15551.2	1918	--	--	NM_000423.2	Homo sapiens keratin 2 (KRT2), mRNA	K07605	type II keratin, basic	Q6EIZ1	Keratin, type II cytoskeletal 2 epidermal OS=Canis lupus familiaris OX=9615 GN=KRT2 PE=2 SV=1	PF01166//PF06657//PF10473//PF07926//PF02050//PF05130//PF00038//PF02874//PF08702//PF05773//PF08074//PF08651//PF02421//PF04513	TSC-22/dip/bun family//Centrosome microtubule-binding domain of Cep57//Leucine-rich repeats of kinetochore protein Cenp-F/LEK1//TPR/MLP1/MLP2-like protein//Flagellar FliJ protein//FlgN protein//Intermediate filament protein//ATP synthase alpha/beta family, beta-barrel domain//Fibrinogen alpha/beta chain family//RWD domain//CHDCT2 (NUC038) domain//DASH complex subunit Duo1//Ferrous iron transport …	GO:0051258//GO:0006935//GO:0006355//GO:0015992//GO:0030168//GO:0044780//GO:0006606//GO:0071973//GO:0046034//GO:0007165//GO:0007067//GO:0015684	protein polymerization//chemotaxis//regulation of transcription, DNA-templated//proton transport//platelet activation//bacterial-type flagellum assembly//protein import into nucleus//bacterial-type flagellum-dependent cell motility//ATP metabolic process//signal transduction//mitotic nuclear division//ferrous iron transport	GO:0042803//GO:0030674//GO:0005525//GO:0008134//GO:0005102//GO:0005524//GO:0016818//GO:0008017//GO:0003677//GO:0003774//GO:0045502//GO:0008270//GO:0015093//GO:0003700//GO:0005198//GO:0005515	protein homodimerization activity//protein binding, bridging//GTP binding//transcription factor binding//receptor binding//ATP binding//hydrolase activity, acting on acid anhydrides, in phosphorus-containing anhydrides//microtubule binding//DNA binding//motor activity//dynein binding//zinc ion binding//ferrous iron transmembrane transporter activity//transcription factor activity, sequence-specif…	GO:0042729//GO:0019031//GO:0016021//GO:0005577//GO:0005667//GO:0005634//GO:0030286//GO:0072686//GO:0005882//GO:0045298//GO:0009288//GO:0016020//GO:0019028	DASH complex//viral envelope//integral component of membrane//fibrinogen complex//transcription factor complex//nucleus//dynein complex//mitotic spindle//intermediate filament//tubulin complex//bacterial-type flagellum//membrane//viral capsid	--	--
Cluster-19915.1	399	--	--	--	--	--	--	--	--	PF10176	Protein of unknown function (DUF2370)	GO:0007034//GO:0030001	vacuolar transport//metal ion transport	--	--	--	--	--	--
Cluster-15551.4	1987	--	--	NM_000423.2	Homo sapiens keratin 2 (KRT2), mRNA	K07605	type II keratin, basic	Q6EIZ1	Keratin, type II cytoskeletal 2 epidermal OS=Canis lupus familiaris OX=9615 GN=KRT2 PE=2 SV=1	PF08074//PF02421//PF04513//PF08651//PF00038//PF02874//PF05773//PF08702//PF02050//PF05130//PF06657//PF10473//PF07926	CHDCT2 (NUC038) domain//Ferrous iron transport protein B//Baculovirus polyhedron envelope protein, PEP, C terminus//DASH complex subunit Duo1//Intermediate filament protein//ATP synthase alpha/beta family, beta-barrel domain//RWD domain//Fibrinogen alpha/beta chain family//Flagellar FliJ protein//FlgN protein//Centrosome microtubule-binding domain of Cep57//Leucine-rich repeats of kinetochore pro…	GO:0015684//GO:0071973//GO:0007067//GO:0007165//GO:0046034//GO:0044780//GO:0006606//GO:0030168//GO:0015992//GO:0006935//GO:0006355//GO:0051258	ferrous iron transport//bacterial-type flagellum-dependent cell motility//mitotic nuclear division//signal transduction//ATP metabolic process//bacterial-type flagellum assembly//protein import into nucleus//platelet activation//proton transport//chemotaxis//regulation of transcription, DNA-templated//protein polymerization	GO:0005515//GO:0005198//GO:0008270//GO:0015093//GO:0003774//GO:0003677//GO:0045502//GO:0016818//GO:0008017//GO:0005524//GO:0005525//GO:0005102//GO:0008134//GO:0042803//GO:0030674	protein binding//structural molecule activity//zinc ion binding//ferrous iron transmembrane transporter activity//motor activity//DNA binding//dynein binding//hydrolase activity, acting on acid anhydrides, in phosphorus-containing anhydrides//microtubule binding//ATP binding//GTP binding//receptor binding//transcription factor binding//protein homodimerization activity//protein binding, bridging	GO:0019028//GO:0016020//GO:0009288//GO:0045298//GO:0005882//GO:0072686//GO:0030286//GO:0005634//GO:0005577//GO:0005667//GO:0016021//GO:0019031//GO:0042729	viral capsid//membrane//bacterial-type flagellum//tubulin complex//intermediate filament//mitotic spindle//dynein complex//nucleus//fibrinogen complex//transcription factor complex//integral component of membrane//viral envelope//DASH complex	--	--
Cluster-1007.134000	929	--	--	--	--	--	--	--	--	PF05454//PF01275//PF01080	Dystroglycan (Dystrophin-associated glycoprotein 1)//Myelin proteolipid protein (PLP or lipophilin)//Presenilin	GO:0007016	cytoskeletal anchoring at plasma membrane	GO:0004190	aspartic-type endopeptidase activity	GO:0016010//GO:0016021	dystrophin-associated glycoprotein complex//integral component of membrane	--	--
Cluster-1007.134001	391	--	--	--	--	--	--	--	--	PF02532//PF01114	Photosystem II reaction centre I protein (PSII 4.8 kDa protein)//Colipase, N-terminal domain	GO:0015979//GO:0016042//GO:0007586	photosynthesis//lipid catabolic process//digestion	GO:0008047	enzyme activator activity	GO:0009539//GO:0009523//GO:0016020//GO:0005576	photosystem II reaction center//photosystem II//membrane//extracellular region	--	--
Cluster-1007.134002	959	--	--	--	--	--	--	--	--	PF00997	Kappa casein	--	--	--	--	GO:0005576	extracellular region	--	--
Cluster-1007.134003	1706	--	--	LC027296.1	Haliotis diversicolor genomic DNA, BAC clone: 001_rep_c979	--	--	Q7LHG5	Transposon Ty3-I Gag-Pol polyprotein OS=Saccharomyces cerevisiae (strain ATCC 204508 / S288c) OX=559292 GN=TY3B-I PE=3 SV=2	--	--	--	--	--	--	--	--	KOG0017	FOG: Transposon-encoded proteins with TYA, reverse transcriptase, integrase domains in various combinations
Cluster-1007.134004	405	--	--	--	--	--	--	--	--	--	--	--	--	--	--	--	--	--	--
Cluster-1007.134005	358	--	--	--	--	--	--	--	--	--	--	--	--	--	--	--	--	--	--
Cluster-22271.0	1069	--	--	--	--	--	--	--	--	--	--	--	--	--	--	--	--	--	--
Cluster-1007.134007	1495	--	--	LC027340.1	Haliotis diversicolor genomic DNA, BAC clone: 006_rep_c2412	--	--	--	--	--	--	--	--	--	--	--	--	--	--
Cluster-1007.134008	4479	--	--	KU500613.1	Azumapecten farreri ATP-binding cassette sub-family G member 2 mRNA, complete cds	K05681	ATP-binding cassette, subfamily G (WHITE), member 2	Q5MB13	ATP-binding cassette sub-family G member 2 OS=Macaca mulatta OX=9544 GN=ABCG2 PE=2 SV=1	PF00005//PF01061//PF13304	ABC transporter//ABC-2 type transporter//AAA domain, putative AbiEii toxin, Type IV TA system	--	--	GO:0005524//GO:0016887	ATP binding//ATPase activity	GO:0016020	membrane	KOG0061	Transporter, ABC superfamily (Breast cancer resistance protein)
Cluster-1007.134009	384	--	--	--	--	--	--	--	--	--	--	--	--	--	--	--	--	--	--
Cluster-1007.39599	401	--	--	--	--	--	--	--	--	--	--	--	--	--	--	--	--	--	--
Cluster-1007.39598	1870	--	--	KT336367.1	Haliotis discus discus signal transducer and activator of transcription 5 (STAT5) gene, complete cds	--	--	--	--	PF15146	Fanconi anemia-associated	GO:0006281	DNA repair	--	--	GO:0043240	Fanconi anaemia nuclear complex	--	--
Cluster-19736.0	576	--	--	LC027358.1	Haliotis diversicolor genomic DNA, BAC clone: 009_rep_c2377	--	--	--	--	--	--	--	--	--	--	--	--	--	--
Cluster-1007.39595	4342	--	--	XM_022206108.1	PREDICTED: Acanthochromis polyacanthus transient receptor potential cation channel subfamily M member 5 (trpm5), mRNA	--	--	O94759	Transient receptor potential cation channel subfamily M member 2 OS=Homo sapiens OX=9606 GN=TRPM2 PE=1 SV=2	PF09520//PF00041//PF16656//PF02943//PF04111//PF04977//PF00520	Type II restriction endonuclease, TdeIII//Fibronectin type III domain//Purple acid Phosphatase, N-terminal domain//Ferredoxin thioredoxin reductase catalytic beta chain//Autophagy protein Apg6//Septum formation initiator//Ion transport protein	GO:0006308//GO:0019497//GO:0055114//GO:0006811//GO:0009307//GO:0006771//GO:0006914//GO:0055085//GO:0007049	DNA catabolic process//hexachlorocyclohexane metabolic process//oxidation-reduction process//ion transport//DNA restriction-modification system//riboflavin metabolic process//autophagy//transmembrane transport//cell cycle	GO:0016730//GO:0003677//GO:0005515//GO:0005216//GO:0046872//GO:0009036//GO:0003993	oxidoreductase activity, acting on iron-sulfur proteins as donors//DNA binding//protein binding//ion channel activity//metal ion binding//Type II site-specific deoxyribonuclease activity//acid phosphatase activity	GO:0016020//GO:0009359	membrane//Type II site-specific deoxyribonuclease complex	--	--
Cluster-1007.39594	3846	--	--	XM_022206108.1	PREDICTED: Acanthochromis polyacanthus transient receptor potential cation channel subfamily M member 5 (trpm5), mRNA	--	--	E9PTA2	Transient receptor potential cation channel subfamily M member 2 OS=Rattus norvegicus OX=10116 GN=Trpm2 PE=1 SV=3	PF09520//PF00041//PF16656//PF00520//PF04977//PF04111	Type II restriction endonuclease, TdeIII//Fibronectin type III domain//Purple acid Phosphatase, N-terminal domain//Ion transport protein//Septum formation initiator//Autophagy protein Apg6	GO:0007049//GO:0055085//GO:0006914//GO:0006771//GO:0009307//GO:0019497//GO:0006308//GO:0006811	cell cycle//transmembrane transport//autophagy//riboflavin metabolic process//DNA restriction-modification system//hexachlorocyclohexane metabolic process//DNA catabolic process//ion transport	GO:0009036//GO:0046872//GO:0005216//GO:0003993//GO:0003677//GO:0005515	Type II site-specific deoxyribonuclease activity//metal ion binding//ion channel activity//acid phosphatase activity//DNA binding//protein binding	GO:0009359//GO:0016020	Type II site-specific deoxyribonuclease complex//membrane	--	--
Cluster-19915.0	258	--	--	--	--	--	--	--	--	--	--	--	--	--	--	--	--	--	--
Cluster-1007.39596	554	--	--	KT336367.1	Haliotis discus discus signal transducer and activator of transcription 5 (STAT5) gene, complete cds	--	--	--	--	--	--	--	--	--	--	--	--	--	--
Cluster-1007.39591	255	--	--	LC027351.1	Haliotis diversicolor genomic DNA, BAC clone: 008_rep_c1013	--	--	--	--	--	--	--	--	--	--	--	--	--	--
Cluster-1007.39590	305	--	--	--	--	--	--	--	--	--	--	--	--	--	--	--	--	--	--
Cluster-1007.39593	1438	--	--	--	--	--	--	--	--	PF14942//PF00041//PF00170//PF16656//PF00831//PF02601//PF04977//PF07730//PF04513//PF09520//PF00038//PF04111	Organelle biogenesis, Muted-like protein//Fibronectin type III domain//bZIP transcription factor//Purple acid Phosphatase, N-terminal domain//Ribosomal L29 protein//Exonuclease VII, large subunit//Septum formation initiator//Histidine kinase//Baculovirus polyhedron envelope protein, PEP, C terminus//Type II restriction endonuclease, TdeIII//Intermediate filament protein//Autophagy protein Apg6	GO:0006914//GO:0006355//GO:0042254//GO:0006771//GO:0016310//GO:0006412//GO:0007049//GO:0000160//GO:0019497//GO:0006308//GO:0009307	autophagy//regulation of transcription, DNA-templated//ribosome biogenesis//riboflavin metabolic process//phosphorylation//translation//cell cycle//phosphorelay signal transduction system//hexachlorocyclohexane metabolic process//DNA catabolic process//DNA restriction-modification system	GO:0043565//GO:0003677//GO:0003735//GO:0046983//GO:0005515//GO:0000155//GO:0009036//GO:0046872//GO:0003993//GO:0005198//GO:0008855//GO:0003700	sequence-specific DNA binding//DNA binding//structural constituent of ribosome//protein dimerization activity//protein binding//phosphorelay sensor kinase activity//Type II site-specific deoxyribonuclease activity//metal ion binding//acid phosphatase activity//structural molecule activity//exodeoxyribonuclease VII activity//transcription factor activity, sequence-specific DNA binding	GO:0031083//GO:0005840//GO:0016021//GO:0005667//GO:0019031//GO:0030133//GO:0009365//GO:0019028//GO:0005622//GO:0009359//GO:0009318//GO:0005882	BLOC-1 complex//ribosome//integral component of membrane//transcription factor complex//viral envelope//transport vesicle//protein histidine kinase complex//viral capsid//intracellular//Type II site-specific deoxyribonuclease complex//exodeoxyribonuclease VII complex//intermediate filament	--	--
Cluster-1007.39592	541	--	--	--	--	--	--	--	--	--	--	--	--	--	--	--	--	--	--
Cluster-42198.0	236	--	--	--	--	--	--	--	--	--	--	--	--	--	--	--	--	--	--
Cluster-13760.0	334	--	--	LC027299.1	Haliotis diversicolor genomic DNA, BAC clone: 001_rep_c982	--	--	--	--	PF06449	Mitochondrial domain of unknown function (DUF1082)	--	--	GO:0016820	hydrolase activity, acting on acid anhydrides, catalyzing transmembrane movement of substances	GO:0016021//GO:0005739	integral component of membrane//mitochondrion	--	--
Cluster-22992.0	428	--	--	--	--	--	--	--	--	--	--	--	--	--	--	--	--	--	--
Cluster-22992.1	922	--	--	--	--	--	--	--	--	PF04277//PF08496//PF08046//PF06524	Oxaloacetate decarboxylase, gamma chain//Peptidase family S49 N-terminal//IlvGEDA operon leader peptide//NOA36 protein	GO:0006525//GO:0006560//GO:0006090//GO:0009082//GO:0071436//GO:0006814	arginine metabolic process//proline metabolic process//pyruvate metabolic process//branched-chain amino acid biosynthetic process//sodium ion export//sodium ion transport	GO:0015081//GO:0004252//GO:0008948//GO:0008270	sodium ion transmembrane transporter activity//serine-type endopeptidase activity//oxaloacetate decarboxylase activity//zinc ion binding	GO:0016020//GO:0005634//GO:0005886	membrane//nucleus//plasma membrane	--	--
Cluster-37150.0	2374	--	--	--	--	--	--	--	--	--	--	--	--	--	--	--	--	--	--
Cluster-15472.0	597	--	--	--	--	--	--	--	--	PF15108	Voltage-dependent calcium channel gamma-like subunit protein family	GO:0006816//GO:0006811	calcium ion transport//ion transport	GO:0005244//GO:0005262	voltage-gated ion channel activity//calcium channel activity	GO:0016021	integral component of membrane	--	--
Cluster-1007.6766	1689	--	--	LC027327.1	Haliotis diversicolor genomic DNA, BAC clone: 003_rep_c699	--	--	--	--	--	--	--	--	--	--	--	--	--	--
Cluster-1007.116996	1504	--	--	DQ785770.1	Haliotis midae clone HmR39T microsatellite sequence	--	--	Q6GL77	UBX domain-containing protein 1 OS=Xenopus tropicalis OX=8364 GN=ubxn1 PE=2 SV=1	PF09004//PF02386//PF04111//PF02601//PF00789	Domain of unknown function (DUF1891)//Cation transport protein//Autophagy protein Apg6//Exonuclease VII, large subunit//UBX domain	GO:0055114//GO:0006308//GO:0006914//GO:0006812//GO:0055085	oxidation-reduction process//DNA catabolic process//autophagy//cation transport//transmembrane transport	GO:0008324//GO:0008168//GO:0016706//GO:0005515//GO:0008855	cation transmembrane transporter activity//methyltransferase activity//oxidoreductase activity, acting on paired donors, with incorporation or reduction of molecular oxygen, 2-oxoglutarate as one donor, and incorporation of one atom each of oxygen into both donors//protein binding//exodeoxyribonuclease VII activity	GO:0009318	exodeoxyribonuclease VII complex	KOG2689	Predicted ubiquitin regulatory protein
Cluster-1007.116997	780	--	--	LC027342.1	Haliotis diversicolor genomic DNA, BAC clone: 006_rep_c2414	--	--	--	--	--	--	--	--	--	--	--	--	--	--
Cluster-1007.116994	1489	--	--	--	--	--	--	--	--	--	--	--	--	--	--	--	--	--	--
Cluster-1007.116995	1425	--	--	--	--	--	--	--	--	--	--	--	--	--	--	--	--	--	--
Cluster-1007.116992	1260	--	--	KT895223.1	Haliotis discus hannai metallothionein (MT) gene, complete cds	--	--	Q8BGT8	Phytanoyl-CoA hydroxylase-interacting protein-like OS=Mus musculus OX=10090 GN=Phyhipl PE=1 SV=1	--	--	--	--	--	--	--	--	--	--
Cluster-1007.116993	728	--	--	--	--	--	--	--	--	--	--	--	--	--	--	--	--	--	--
Cluster-1007.116990	583	--	--	--	--	--	--	--	--	--	--	--	--	--	--	--	--	--	--
Cluster-1007.27131	1322	--	--	LC027294.1	Haliotis diversicolor genomic DNA, BAC clone: 001_rep_c977	K05545	tRNA-dihydrouridine synthase 4	Q32M08	tRNA-dihydrouridine(20a/20b) synthase [NAD(P)+]-like OS=Mus musculus OX=10090 GN=Dus4l PE=2 SV=1	PF01207//PF04309//PF00977//PF02581	Dihydrouridine synthase (Dus)//Glycerol-3-phosphate responsive antiterminator//Histidine biosynthesis protein//Thiamine monophosphate synthase/TENI	GO:0055114//GO:0009228//GO:0009607//GO:0000105//GO:0008033//GO:0006355	oxidation-reduction process//thiamine biosynthetic process//response to biotic stimulus//histidine biosynthetic process//tRNA processing//regulation of transcription, DNA-templated	GO:0004789//GO:0050660//GO:0017150	thiamine-phosphate diphosphorylase activity//flavin adenine dinucleotide binding//tRNA dihydrouridine synthase activity	--	--	KOG2335	tRNA-dihydrouridine synthase
Cluster-26730.0	531	--	--	--	--	--	--	--	--	--	--	--	--	--	--	--	--	--	--
Cluster-1007.35808	2316	--	--	--	--	K08288	protein kinase C substrate 80K-H	Q28034	Glucosidase 2 subunit beta OS=Bos taurus OX=9913 GN=PRKCSH PE=2 SV=1	PF00878	Cation-independent mannose-6-phosphate receptor repeat	GO:0006810	transport	GO:0005215	transporter activity	GO:0016021//GO:0005737	integral component of membrane//cytoplasm	KOG2397	Protein kinase C substrate, 80 KD protein, heavy chain
Cluster-1007.119955	534	--	--	LC027297.1	Haliotis diversicolor genomic DNA, BAC clone: 001_rep_c980	--	--	--	--	--	--	--	--	--	--	--	--	--	--
Cluster-1007.116998	1380	--	--	LC027297.1	Haliotis diversicolor genomic DNA, BAC clone: 001_rep_c980	--	--	--	--	--	--	--	--	--	--	--	--	--	--
Cluster-1007.116999	285	--	--	LC027340.1	Haliotis diversicolor genomic DNA, BAC clone: 006_rep_c2412	--	--	--	--	--	--	--	--	--	--	--	--	--	--
Cluster-1007.119954	265	--	--	--	--	--	--	--	--	--	--	--	--	--	--	--	--	--	--
Cluster-1007.119953	1125	--	--	LC027297.1	Haliotis diversicolor genomic DNA, BAC clone: 001_rep_c980	--	--	--	--	--	--	--	--	--	--	--	--	--	--
Cluster-1007.6761	2103	--	--	KT336367.1	Haliotis discus discus signal transducer and activator of transcription 5 (STAT5) gene, complete cds	--	--	--	--	--	--	--	--	--	--	--	--	--	--
Cluster-1007.119952	461	--	--	LC027297.1	Haliotis diversicolor genomic DNA, BAC clone: 001_rep_c980	--	--	--	--	PF04881	Adenovirus GP19K	GO:0050690	regulation of defense response to virus by virus	GO:0005537	mannose binding	--	--	--	--
Cluster-1007.119951	268	--	--	--	--	--	--	--	--	--	--	--	--	--	--	--	--	--	--
Cluster-1007.119950	1210	--	--	LC027304.1	Haliotis diversicolor genomic DNA, BAC clone: 002_c4	--	--	--	--	--	--	--	--	--	--	--	--	--	--
Cluster-19990.0	420	--	--	--	--	--	--	--	--	--	--	--	--	--	--	--	--	--	--
Cluster-1131.0	438	--	--	HQ650238.1	Haliotis diversicolor clone Hdi59 microsatellite sequence	--	--	--	--	--	--	--	--	--	--	--	--	--	--
Cluster-1007.40850	687	--	--	LC027337.1	Haliotis diversicolor genomic DNA, BAC clone: 005_rep_c2730	--	--	--	--	--	--	--	--	--	--	--	--	--	--
Cluster-1007.40851	304	--	--	--	--	--	--	--	--	--	--	--	--	--	--	--	--	--	--
Cluster-1007.111418	876	--	--	LC027332.1	Haliotis diversicolor genomic DNA, BAC clone: 004_rep_c861	--	--	Q14592	Zinc finger protein 460 OS=Homo sapiens OX=9606 GN=ZNF460 PE=1 SV=2	PF13465//PF01096//PF02146//PF01258//PF16622//PF00412//PF13912//PF00096//PF03604//PF05443	Zinc-finger double domain//Transcription factor S-II (TFIIS)//Sir2 family//Prokaryotic dksA/traR C4-type zinc finger//zinc-finger C2H2-type//LIM domain//C2H2-type zinc finger//Zinc finger, C2H2 type//DNA directed RNA polymerase, 7 kDa subunit//ROS/MUCR transcriptional regulator protein	GO:0006144//GO:0006351//GO:0006206//GO:0006355	purine nucleobase metabolic process//transcription, DNA-templated//pyrimidine nucleobase metabolic process//regulation of transcription, DNA-templated	GO:0003676//GO:0003677//GO:0003899//GO:0008270//GO:0070403//GO:0046872	nucleic acid binding//DNA binding//DNA-directed RNA polymerase activity//zinc ion binding//NAD+ binding//metal ion binding	GO:0005730	nucleolus	--	--
Cluster-1007.111419	313	--	--	XM_010593256.2	PREDICTED: Loxodonta africana zinc finger protein 699-like (LOC100663525), transcript variant X6, mRNA	K09228	KRAB domain-containing zinc finger protein	Q147U1	Zinc finger protein 846 OS=Homo sapiens OX=9606 GN=ZNF846 PE=1 SV=2	PF05443//PF01096//PF03604//PF00096//PF13912//PF13465//PF16622	ROS/MUCR transcriptional regulator protein//Transcription factor S-II (TFIIS)//DNA directed RNA polymerase, 7 kDa subunit//Zinc finger, C2H2 type//C2H2-type zinc finger//Zinc-finger double domain//zinc-finger C2H2-type	GO:0006206//GO:0006351//GO:0006355//GO:0006144	pyrimidine nucleobase metabolic process//transcription, DNA-templated//regulation of transcription, DNA-templated//purine nucleobase metabolic process	GO:0008270//GO:0046872//GO:0003676//GO:0003677//GO:0003899	zinc ion binding//metal ion binding//nucleic acid binding//DNA binding//DNA-directed RNA polymerase activity	GO:0005730	nucleolus	--	--
Cluster-1007.40854	222	--	--	--	--	K00273	D-amino-acid oxidase	P22942	D-amino-acid oxidase OS=Oryctolagus cuniculus OX=9986 GN=DAO PE=2 SV=1	PF01266	FAD dependent oxidoreductase	GO:0055114	oxidation-reduction process	GO:0016491	oxidoreductase activity	--	--	--	--
Cluster-1007.40855	1455	--	--	--	--	--	--	Q6PAY6	Hydroxyproline dehydrogenase OS=Xenopus laevis OX=8355 GN=prodh2 PE=2 SV=1	--	--	--	--	--	--	--	--	KOG0186	Proline oxidase
Cluster-1007.40856	820	--	--	--	--	K00273	D-amino-acid oxidase	P22942	D-amino-acid oxidase OS=Oryctolagus cuniculus OX=9986 GN=DAO PE=2 SV=1	PF01266	FAD dependent oxidoreductase	GO:0055114	oxidation-reduction process	GO:0016491	oxidoreductase activity	--	--	KOG3923	D-aspartate oxidase
Cluster-1007.40857	640	--	--	--	--	K00273	D-amino-acid oxidase	A2V9Y8	D-amino-acid oxidase OS=Macaca fascicularis OX=9541 GN=DAO PE=2 SV=1	PF07992//PF03721//PF01266	Pyridine nucleotide-disulphide oxidoreductase//UDP-glucose/GDP-mannose dehydrogenase family, NAD binding domain//FAD dependent oxidoreductase	GO:0055114	oxidation-reduction process	GO:0016491//GO:0051287//GO:0016616	oxidoreductase activity//NAD binding//oxidoreductase activity, acting on the CH-OH group of donors, NAD or NADP as acceptor	--	--	KOG3923	D-aspartate oxidase
Cluster-1007.111412	740	--	--	XM_010593256.2	PREDICTED: Loxodonta africana zinc finger protein 699-like (LOC100663525), transcript variant X6, mRNA	K09228	KRAB domain-containing zinc finger protein	Q14592	Zinc finger protein 460 OS=Homo sapiens OX=9606 GN=ZNF460 PE=1 SV=2	PF13465//PF02146//PF01096//PF01258//PF16622//PF00412//PF13912//PF00096//PF03604//PF05443	Zinc-finger double domain//Sir2 family//Transcription factor S-II (TFIIS)//Prokaryotic dksA/traR C4-type zinc finger//zinc-finger C2H2-type//LIM domain//C2H2-type zinc finger//Zinc finger, C2H2 type//DNA directed RNA polymerase, 7 kDa subunit//ROS/MUCR transcriptional regulator protein	GO:0006355//GO:0006351//GO:0006206//GO:0006144	regulation of transcription, DNA-templated//transcription, DNA-templated//pyrimidine nucleobase metabolic process//purine nucleobase metabolic process	GO:0046872//GO:0070403//GO:0008270//GO:0003899//GO:0003676//GO:0003677	metal ion binding//NAD+ binding//zinc ion binding//DNA-directed RNA polymerase activity//nucleic acid binding//DNA binding	GO:0005730	nucleolus	--	--
Cluster-1007.111413	351	--	--	XM_011736970.1	PREDICTED: Macaca nemestrina zinc finger protein 562-like (LOC105479121), mRNA	K09228	KRAB domain-containing zinc finger protein	Q147U1	Zinc finger protein 846 OS=Homo sapiens OX=9606 GN=ZNF846 PE=1 SV=2	PF16622//PF01428//PF13912//PF00096//PF00569//PF01844//PF13465//PF00935//PF07975//PF01096	zinc-finger C2H2-type//AN1-like Zinc finger//C2H2-type zinc finger//Zinc finger, C2H2 type//Zinc finger, ZZ type//HNH endonuclease//Zinc-finger double domain//Ribosomal protein L44//TFIIH C1-like domain//Transcription factor S-II (TFIIS)	GO:0006351//GO:0006281//GO:0006412//GO:0042254	transcription, DNA-templated//DNA repair//translation//ribosome biogenesis	GO:0008270//GO:0046872//GO:0003735//GO:0003676//GO:0004519	zinc ion binding//metal ion binding//structural constituent of ribosome//nucleic acid binding//endonuclease activity	GO:0005840//GO:0005622	ribosome//intracellular	--	--
Cluster-1007.111410	711	--	--	XM_004715418.2	PREDICTED: Echinops telfairi zinc finger protein OZF-like (LOC101639490), mRNA	K09228	KRAB domain-containing zinc finger protein	Q147U1	Zinc finger protein 846 OS=Homo sapiens OX=9606 GN=ZNF846 PE=1 SV=2	PF16622//PF13912//PF00096//PF05191//PF02892//PF13465//PF01844//PF01096//PF07975	zinc-finger C2H2-type//C2H2-type zinc finger//Zinc finger, C2H2 type//Adenylate kinase, active site lid//BED zinc finger//Zinc-finger double domain//HNH endonuclease//Transcription factor S-II (TFIIS)//TFIIH C1-like domain	GO:0046034//GO:0006144//GO:0006351//GO:0006281	ATP metabolic process//purine nucleobase metabolic process//transcription, DNA-templated//DNA repair	GO:0003677//GO:0003676//GO:0004519//GO:0008270//GO:0004017//GO:0046872	DNA binding//nucleic acid binding//endonuclease activity//zinc ion binding//adenylate kinase activity//metal ion binding	--	--	--	--
Cluster-1007.111411	1354	--	--	--	--	K09228	KRAB domain-containing zinc finger protein	Q96MU6	Zinc finger protein 778 OS=Homo sapiens OX=9606 GN=ZNF778 PE=1 SV=3	PF05443//PF13912//PF07498//PF00096//PF01180//PF13465//PF16622	ROS/MUCR transcriptional regulator protein//C2H2-type zinc finger//Rho termination factor, N-terminal domain//Zinc finger, C2H2 type//Dihydroorotate dehydrogenase//Zinc-finger double domain//zinc-finger C2H2-type	GO:0006355//GO:0006353//GO:0055114	regulation of transcription, DNA-templated//DNA-templated transcription, termination//oxidation-reduction process	GO:0008270//GO:0046872//GO:0003677//GO:0016627	zinc ion binding//metal ion binding//DNA binding//oxidoreductase activity, acting on the CH-CH group of donors	GO:0005737	cytoplasm	--	--
Cluster-1007.111416	998	--	--	XM_006897982.1	PREDICTED: Elephantulus edwardii zinc finger protein 135-like (LOC102876808), mRNA	K09228	KRAB domain-containing zinc finger protein	P52742	Zinc finger protein 135 OS=Homo sapiens OX=9606 GN=ZNF135 PE=2 SV=3	PF01096//PF07975//PF13465//PF02892//PF13639//PF13912//PF00096//PF00412//PF10588//PF01363//PF16622	Transcription factor S-II (TFIIS)//TFIIH C1-like domain//Zinc-finger double domain//BED zinc finger//Ring finger domain//C2H2-type zinc finger//Zinc finger, C2H2 type//LIM domain//NADH-ubiquinone oxidoreductase-G iron-sulfur binding region//FYVE zinc finger//zinc-finger C2H2-type	GO:0006351//GO:0006281//GO:0055114	transcription, DNA-templated//DNA repair//oxidation-reduction process	GO:0016491//GO:0046872//GO:0008270//GO:0003676//GO:0003677//GO:0005515	oxidoreductase activity//metal ion binding//zinc ion binding//nucleic acid binding//DNA binding//protein binding	--	--	--	--
Cluster-1007.111417	440	--	--	XM_011736970.1	PREDICTED: Macaca nemestrina zinc finger protein 562-like (LOC105479121), mRNA	K09228	KRAB domain-containing zinc finger protein	Q4R6C2	Zinc finger protein 383 OS=Macaca fascicularis OX=9541 GN=ZNF383 PE=2 SV=1	PF04997//PF01096//PF05191//PF13912//PF00096//PF13465//PF16622	RNA polymerase Rpb1, domain 1//Transcription factor S-II (TFIIS)//Adenylate kinase, active site lid//C2H2-type zinc finger//Zinc finger, C2H2 type//Zinc-finger double domain//zinc-finger C2H2-type	GO:0046034//GO:0006144//GO:0006351//GO:0006206	ATP metabolic process//purine nucleobase metabolic process//transcription, DNA-templated//pyrimidine nucleobase metabolic process	GO:0003899//GO:0003676//GO:0003677//GO:0046872//GO:0008270//GO:0004017	DNA-directed RNA polymerase activity//nucleic acid binding//DNA binding//metal ion binding//zinc ion binding//adenylate kinase activity	GO:0005730	nucleolus	--	--
Cluster-1007.111414	314	--	--	XM_014865619.1	PREDICTED: Equus asinus zinc finger protein 132-like (LOC106846673), transcript variant X3, mRNA	K09228	KRAB domain-containing zinc finger protein	Q147U1	Zinc finger protein 846 OS=Homo sapiens OX=9606 GN=ZNF846 PE=1 SV=2	PF13465//PF01844//PF01155//PF02892//PF07975//PF01096//PF16622//PF05443//PF03604//PF13912//PF00096	Zinc-finger double domain//HNH endonuclease//Hydrogenase/urease nickel incorporation, metallochaperone, hypA//BED zinc finger//TFIIH C1-like domain//Transcription factor S-II (TFIIS)//zinc-finger C2H2-type//ROS/MUCR transcriptional regulator protein//DNA directed RNA polymerase, 7 kDa subunit//C2H2-type zinc finger//Zinc finger, C2H2 type	GO:0006144//GO:0006355//GO:0006464//GO:0006206//GO:0006351//GO:0006281	purine nucleobase metabolic process//regulation of transcription, DNA-templated//cellular protein modification process//pyrimidine nucleobase metabolic process//transcription, DNA-templated//DNA repair	GO:0003899//GO:0016151//GO:0004519//GO:0003676//GO:0003677//GO:0046872//GO:0008270	DNA-directed RNA polymerase activity//nickel cation binding//endonuclease activity//nucleic acid binding//DNA binding//metal ion binding//zinc ion binding	GO:0005730	nucleolus	--	--
Cluster-1007.111415	325	--	--	XM_023525059.1	PREDICTED: Pteropus vampyrus zinc finger protein 782 (ZNF782), mRNA	K09228	KRAB domain-containing zinc finger protein	Q15935	Zinc finger protein 77 OS=Homo sapiens OX=9606 GN=ZNF77 PE=2 SV=2	PF01096//PF07975//PF13465//PF01844//PF05191//PF00096//PF13912//PF16622	Transcription factor S-II (TFIIS)//TFIIH C1-like domain//Zinc-finger double domain//HNH endonuclease//Adenylate kinase, active site lid//Zinc finger, C2H2 type//C2H2-type zinc finger//zinc-finger C2H2-type	GO:0006281//GO:0006351//GO:0006144//GO:0046034	DNA repair//transcription, DNA-templated//purine nucleobase metabolic process//ATP metabolic process	GO:0046872//GO:0004017//GO:0008270//GO:0004519//GO:0003676	metal ion binding//adenylate kinase activity//zinc ion binding//endonuclease activity//nucleic acid binding	--	--	--	--
Cluster-1007.123844	727	--	--	--	--	--	--	--	--	--	--	--	--	--	--	--	--	--	--
Cluster-1007.123845	786	--	--	--	--	--	--	--	--	--	--	--	--	--	--	--	--	--	--
Cluster-1007.123846	454	--	--	--	--	--	--	--	--	--	--	--	--	--	--	--	--	--	--
Cluster-1007.123847	491	--	--	LC027339.1	Haliotis diversicolor genomic DNA, BAC clone: 006_rep_c2411	--	--	--	--	--	--	--	--	--	--	--	--	--	--
Cluster-1007.123840	432	--	--	--	--	--	--	--	--	--	--	--	--	--	--	--	--	--	--
Cluster-1007.123841	1661	--	--	--	--	K00742	N-acetyllactosaminide beta-1,6-N-acetylglucosaminyltransferase	Q9P109	Beta-1,3-galactosyl-O-glycosyl-glycoprotein beta-1,6-N-acetylglucosaminyltransferase 4 OS=Homo sapiens OX=9606 GN=GCNT4 PE=2 SV=1	PF02485	Core-2/I-Branching enzyme	--	--	GO:0008375	acetylglucosaminyltransferase activity	GO:0016020	membrane	--	--
Cluster-1007.123842	1608	--	--	--	--	--	--	--	--	--	--	--	--	--	--	--	--	--	--
Cluster-1007.123843	1584	--	--	--	--	--	--	--	--	--	--	--	--	--	--	--	--	--	--
Cluster-17292.0	347	--	--	--	--	--	--	--	--	--	--	--	--	--	--	--	--	--	--
Cluster-13484.0	666	--	--	--	--	--	--	--	--	--	--	--	--	--	--	--	--	--	--
Cluster-1007.123849	1091	--	--	--	--	K14847	ribosome production factor 2	Q9JJ80	Ribosome production factor 2 homolog OS=Mus musculus OX=10090 GN=Rpf2 PE=2 SV=2	PF01702//PF08911	Queuine tRNA-ribosyltransferase//NUP50 (Nucleoporin 50 kDa)	GO:0008616//GO:0006400	queuosine biosynthetic process//tRNA modification	GO:0008479	queuine tRNA-ribosyltransferase activity	GO:0005643	nuclear pore	KOG3031	Protein required for biogenesis of the ribosomal 60S subunit
Cluster-1007.121129	619	--	--	--	--	--	--	--	--	--	--	--	--	--	--	--	--	--	--
Cluster-1007.48674	1471	--	--	XM_002605654.1	Branchiostoma floridae hypothetical protein, mRNA	K15423	serine/threonine-protein phosphatase 4 catalytic subunit	Q5R6K8	Serine/threonine-protein phosphatase 4 catalytic subunit OS=Pongo abelii OX=9601 GN=PPP4C PE=2 SV=1	PF00149	Calcineurin-like phosphoesterase	--	--	GO:0016787	hydrolase activity	--	--	KOG0372	Serine/threonine specific protein phosphatase involved in glycogen accumulation, PP2A-related
Cluster-1007.48675	278	--	--	--	--	--	--	--	--	--	--	--	--	--	--	--	--	--	--
Cluster-1007.48676	552	--	--	LC027301.1	Haliotis diversicolor genomic DNA, BAC clone: 002_c1	--	--	--	--	--	--	--	--	--	--	--	--	--	--
Cluster-1007.48677	516	--	--	--	--	--	--	--	--	--	--	--	--	--	--	--	--	--	--
Cluster-1007.48670	3164	--	--	LC027303.1	Haliotis diversicolor genomic DNA, BAC clone: 002_c3	--	--	Q6GR34	Uncharacterized protein C16orf52 homolog A OS=Xenopus laevis OX=8355 PE=2 SV=1	PF01654//PF08057	Cytochrome bd terminal oxidase subunit I//Erythromycin resistance leader peptide	GO:0046677	response to antibiotic	--	--	GO:0016020	membrane	--	--
Cluster-1007.48671	475	--	--	--	--	--	--	O43405	Cochlin OS=Homo sapiens OX=9606 GN=COCH PE=1 SV=1	--	--	--	--	--	--	--	--	--	--
Cluster-1007.48672	774	--	--	--	--	--	--	--	--	--	--	--	--	--	--	--	--	--	--
Cluster-1007.48673	1255	--	--	XM_002605654.1	Branchiostoma floridae hypothetical protein, mRNA	K15423	serine/threonine-protein phosphatase 4 catalytic subunit	P97470	Serine/threonine-protein phosphatase 4 catalytic subunit OS=Mus musculus OX=10090 GN=Ppp4c PE=1 SV=2	PF00149	Calcineurin-like phosphoesterase	--	--	GO:0016787	hydrolase activity	--	--	KOG0372	Serine/threonine specific protein phosphatase involved in glycogen accumulation, PP2A-related
Cluster-1007.48678	553	--	--	--	--	--	--	--	--	--	--	--	--	--	--	--	--	--	--
Cluster-1007.48679	290	--	--	LC027336.1	Haliotis diversicolor genomic DNA, BAC clone: 005_rep_c27301	--	--	--	--	--	--	--	--	--	--	--	--	--	--
Cluster-31478.0	1848	--	--	--	--	--	--	P34299	Glutamate receptor 1 OS=Caenorhabditis elegans OX=6239 GN=glr-1 PE=1 SV=2	PF00060//PF10613	Ligand-gated ion channel//Ligated ion channel L-glutamate- and glycine-binding site	GO:0007165//GO:0007268//GO:0006811	signal transduction//synaptic transmission//ion transport	GO:0004970//GO:0005234	ionotropic glutamate receptor activity//extracellular-glutamate-gated ion channel activity	GO:0016020	membrane	KOG1052	Glutamate-gated kainate-type ion channel receptor subunit GluR5 and related subunits
Cluster-1007.121128	1725	--	--	--	--	--	--	--	--	PF02116	Fungal pheromone mating factor STE2 GPCR	GO:0007606//GO:0019236//GO:0007186	sensory perception of chemical stimulus//response to pheromone//G-protein coupled receptor signaling pathway	GO:0004932	mating-type factor pheromone receptor activity	GO:0016020	membrane	--	--
Cluster-26017.2	2592	--	--	--	--	K04153	5-hydroxytryptamine receptor 1	Q9N296	5-hydroxytryptamine receptor 1A OS=Pongo pygmaeus OX=9600 GN=HTR1A PE=3 SV=1	PF00001//PF05829	7 transmembrane receptor (rhodopsin family)//Adenovirus late L2 mu core protein (Protein X)	GO:0007186	G-protein coupled receptor signaling pathway	GO:0003677//GO:0004930	DNA binding//G-protein coupled receptor activity	GO:0019013//GO:0016021	viral nucleocapsid//integral component of membrane	KOG3656	FOG: 7 transmembrane receptor
Cluster-41383.0	846	--	--	--	--	--	--	--	--	--	--	--	--	--	--	--	--	--	--
Cluster-1007.15689	3586	--	--	--	--	--	--	--	--	PF00071//PF07527	Ras family//Hairy Orange	GO:0007264//GO:0006355	small GTPase mediated signal transduction//regulation of transcription, DNA-templated	GO:0003677//GO:0005525	DNA binding//GTP binding	--	--	--	--
Cluster-1007.15688	2716	--	--	--	--	--	--	--	--	--	--	--	--	--	--	--	--	--	--
Cluster-1007.15687	1220	--	--	--	--	--	--	--	--	--	--	--	--	--	--	--	--	--	--
Cluster-1007.15686	249	--	--	--	--	--	--	--	--	--	--	--	--	--	--	--	--	--	--
Cluster-1007.15685	375	--	--	--	--	--	--	--	--	--	--	--	--	--	--	--	--	--	--
Cluster-1007.15684	334	--	--	--	--	--	--	--	--	--	--	--	--	--	--	--	--	--	--
Cluster-1007.15683	514	--	--	--	--	--	--	--	--	--	--	--	--	--	--	--	--	--	--
Cluster-1007.15682	902	--	--	--	--	--	--	--	--	PF02468	Photosystem II reaction centre N protein (psbN)	GO:0015979	photosynthesis	--	--	GO:0016020//GO:0009523//GO:0009539	membrane//photosystem II//photosystem II reaction center	--	--
Cluster-1007.15681	249	--	--	--	--	--	--	--	--	--	--	--	--	--	--	--	--	--	--
Cluster-1007.15680	2086	--	--	--	--	K11810	MFS transporter, MCP family, solute carrier family 16 (monocarboxylic acid transporters), member 12	O15374	Monocarboxylate transporter 5 OS=Homo sapiens OX=9606 GN=SLC16A4 PE=2 SV=1	PF07690	Major Facilitator Superfamily	GO:0055085	transmembrane transport	--	--	GO:0016021	integral component of membrane	KOG2504	Monocarboxylate transporter
Cluster-27044.0	490	--	--	LC027359.1	Haliotis diversicolor genomic DNA, BAC clone: 009_rep_c2378	--	--	--	--	--	--	--	--	--	--	--	--	--	--
Cluster-1007.127699	3075	--	--	--	--	--	--	--	--	--	--	--	--	--	--	--	--	--	--
Cluster-1007.127698	717	--	--	--	--	--	--	--	--	--	--	--	--	--	--	--	--	--	--
Cluster-1007.127695	3121	--	--	--	--	--	--	--	--	--	--	--	--	--	--	--	--	--	--
Cluster-1007.127694	1241	--	--	LC027297.1	Haliotis diversicolor genomic DNA, BAC clone: 001_rep_c980	--	--	--	--	PF00895	ATP synthase protein 8	GO:0015992//GO:0015986	proton transport//ATP synthesis coupled proton transport	GO:0015078	hydrogen ion transmembrane transporter activity	GO:0000276	mitochondrial proton-transporting ATP synthase complex, coupling factor F(o)	--	--
Cluster-1007.127697	919	--	--	--	--	--	--	--	--	--	--	--	--	--	--	--	--	--	--
Cluster-1007.127696	633	--	--	LC027358.1	Haliotis diversicolor genomic DNA, BAC clone: 009_rep_c2377	--	--	--	--	--	--	--	--	--	--	--	--	--	--
Cluster-1007.127691	859	--	--	--	--	--	--	--	--	--	--	--	--	--	--	--	--	--	--
Cluster-1007.127690	1376	--	--	--	--	--	--	--	--	--	--	--	--	--	--	--	--	--	--
Cluster-1007.127693	1167	--	--	LC027302.1	Haliotis diversicolor genomic DNA, BAC clone: 002_c2	--	--	--	--	--	--	--	--	--	--	--	--	--	--
Cluster-1007.127692	1700	--	--	--	--	--	--	--	--	--	--	--	--	--	--	--	--	--	--
Cluster-27873.1	2822	--	--	--	--	--	--	Q6RT24	Centromere-associated protein E OS=Mus musculus OX=10090 GN=Cenpe PE=1 SV=1	PF06005//PF00225	Protein of unknown function (DUF904)//Kinesin motor domain	GO:0007018//GO:0007017//GO:0043093//GO:0000917	microtubule-based movement//microtubule-based process//FtsZ-dependent cytokinesis//barrier septum assembly	GO:0005524//GO:0003777//GO:0008017	ATP binding//microtubule motor activity//microtubule binding	GO:0005874//GO:0045298//GO:0005737	microtubule//tubulin complex//cytoplasm	KOG0242	Kinesin-like protein
Cluster-20336.0	858	--	--	NM_128638.3	Arabidopsis thaliana glutathione S-transferase PHI 9 (GSTF9), mRNA	--	--	O80852	Glutathione S-transferase F9 OS=Arabidopsis thaliana OX=3702 GN=GSTF9 PE=1 SV=1	PF02798//PF13409//PF00462//PF13417	Glutathione S-transferase, N-terminal domain//Glutathione S-transferase, N-terminal domain//Glutaredoxin//Glutathione S-transferase, N-terminal domain	GO:0045454//GO:0006118	cell redox homeostasis//obsolete electron transport	GO:0009055//GO:0005515//GO:0015035	electron carrier activity//protein binding//protein disulfide oxidoreductase activity	--	--	--	--
Cluster-4407.0	597	--	--	--	--	--	--	--	--	--	--	--	--	--	--	--	--	--	--
Cluster-27873.0	2630	--	--	--	--	K11498	centromeric protein E	Q6RT24	Centromere-associated protein E OS=Mus musculus OX=10090 GN=Cenpe PE=1 SV=1	PF06005//PF00225	Protein of unknown function (DUF904)//Kinesin motor domain	GO:0000917//GO:0043093//GO:0007017//GO:0007018	barrier septum assembly//FtsZ-dependent cytokinesis//microtubule-based process//microtubule-based movement	GO:0008017//GO:0003777//GO:0005524	microtubule binding//microtubule motor activity//ATP binding	GO:0045298//GO:0005737//GO:0005874	tubulin complex//cytoplasm//microtubule	KOG0242	Kinesin-like protein
Cluster-27873.2	2759	--	--	--	--	K11498	centromeric protein E	Q6RT24	Centromere-associated protein E OS=Mus musculus OX=10090 GN=Cenpe PE=1 SV=1	PF00225//PF06005	Kinesin motor domain//Protein of unknown function (DUF904)	GO:0000917//GO:0043093//GO:0007017//GO:0007018	barrier septum assembly//FtsZ-dependent cytokinesis//microtubule-based process//microtubule-based movement	GO:0003777//GO:0008017//GO:0005524	microtubule motor activity//microtubule binding//ATP binding	GO:0005737//GO:0045298//GO:0005874	cytoplasm//tubulin complex//microtubule	KOG0242	Kinesin-like protein
Cluster-41365.0	766	--	--	LC027294.1	Haliotis diversicolor genomic DNA, BAC clone: 001_rep_c977	--	--	--	--	--	--	--	--	--	--	--	--	--	--
Cluster-1007.57432	748	--	--	--	--	--	--	--	--	PF08138	Sex peptide (SP) family	GO:0046008//GO:0007165	regulation of female receptivity, post-mating//signal transduction	GO:0005179	hormone activity	GO:0005576	extracellular region	--	--
Cluster-43797.0	3234	--	--	--	--	--	--	--	--	PF01213//PF13443//PF15200//PF01698//PF10541	Adenylate cyclase associated (CAP) N terminal//Cro/C1-type HTH DNA-binding domain//Keratinocyte differentiation-associated//Floricaula / Leafy protein//Nuclear envelope localisation domain	GO:0007010//GO:0006355	cytoskeleton organization//regulation of transcription, DNA-templated	GO:0043565//GO:0003779//GO:0003677	sequence-specific DNA binding//actin binding//DNA binding	GO:0016021//GO:0005576	integral component of membrane//extracellular region	--	--
Cluster-21963.0	883	--	--	--	--	--	--	--	--	PF00209	Sodium:neurotransmitter symporter family	GO:0006836//GO:0006812	neurotransmitter transport//cation transport	GO:0005328	neurotransmitter:sodium symporter activity	GO:0016021	integral component of membrane	--	--
Cluster-1007.57433	321	--	--	--	--	--	--	Q28C44	CWF19-like protein 2 OS=Xenopus tropicalis OX=8364 GN=cwf19l2 PE=2 SV=1	PF02778	tRNA intron endonuclease, N-terminal domain	GO:0051252//GO:0006388	regulation of RNA metabolic process//tRNA splicing, via endonucleolytic cleavage and ligation	GO:0000213	tRNA-intron endonuclease activity	GO:0000214	tRNA-intron endonuclease complex	KOG2477	Uncharacterized conserved protein
Cluster-20914.0	599	--	--	--	--	--	--	--	--	--	--	--	--	--	--	--	--	--	--
Cluster-1007.57430	2611	--	--	--	--	--	--	--	--	PF16671	Actin cross-linking domain	GO:0090527	actin filament reorganization	--	--	--	--	--	--
Cluster-1007.57431	1040	--	--	GU995969.1	Haliotis discus hannai clone CHh089 microsatellite sequence	--	--	--	--	PF13912//PF00096//PF16622	C2H2-type zinc finger//Zinc finger, C2H2 type//zinc-finger C2H2-type	--	--	GO:0046872	metal ion binding	--	--	--	--
Cluster-1007.57436	2249	--	--	LC027342.1	Haliotis diversicolor genomic DNA, BAC clone: 006_rep_c2414	--	--	--	--	--	--	--	--	--	--	--	--	--	--
Cluster-24369.0	3471	--	--	--	--	--	--	--	--	PF16251//PF02739//PF00867	Nucleic acid-binding domain (NAR)//5'-3' exonuclease, N-terminal resolvase-like domain//XPG I-region	--	--	GO:0003677//GO:0003676//GO:0004518	DNA binding//nucleic acid binding//nuclease activity	--	--	--	--
Cluster-1007.57437	1907	--	--	--	--	--	--	--	--	PF08093	Magi 5 toxic peptide family	GO:0006810//GO:0009405	transport//pathogenesis	GO:0019871	sodium channel inhibitor activity	GO:0005576	extracellular region	--	--
Cluster-1007.60410	4990	--	--	--	--	--	--	--	--	PF02387	IncFII RepA protein family	GO:0006276	plasmid maintenance	--	--	--	--	--	--
Cluster-1007.60411	1262	--	--	--	--	--	--	--	--	--	--	--	--	--	--	--	--	--	--
Cluster-36358.0	657	--	--	--	--	--	--	Q13416	Origin recognition complex subunit 2 OS=Homo sapiens OX=9606 GN=ORC2 PE=1 SV=2	--	--	--	--	--	--	--	--	--	--
Cluster-1007.18305	2115	--	--	--	--	K13130	survival of motor neuron protein-interacting protein 1	O42260	Gem-associated protein 2 OS=Xenopus laevis OX=8355 GN=gemin2 PE=2 SV=1	PF02434//PF16588	Fringe-like//C2H2 zinc-finger	--	--	GO:0016757//GO:0003676//GO:0008270	transferase activity, transferring glycosyl groups//nucleic acid binding//zinc ion binding	GO:0016020	membrane	--	--
Cluster-1007.18304	1131	--	--	--	--	--	--	--	--	PF09810	Exonuclease V - a 5' deoxyribonuclease	GO:0006308	DNA catabolic process	GO:0045145	single-stranded DNA 5'-3' exodeoxyribonuclease activity	--	--	--	--
Cluster-1007.18307	2144	--	--	--	--	K13130	survival of motor neuron protein-interacting protein 1	O14893	Gem-associated protein 2 OS=Homo sapiens OX=9606 GN=GEMIN2 PE=1 SV=1	PF16588//PF02434	C2H2 zinc-finger//Fringe-like	--	--	GO:0008270//GO:0016757//GO:0003676	zinc ion binding//transferase activity, transferring glycosyl groups//nucleic acid binding	GO:0016020	membrane	--	--
Cluster-1007.18306	2120	--	--	--	--	K13130	survival of motor neuron protein-interacting protein 1	O14893	Gem-associated protein 2 OS=Homo sapiens OX=9606 GN=GEMIN2 PE=1 SV=1	PF16588//PF02434	C2H2 zinc-finger//Fringe-like	--	--	GO:0008270//GO:0003676//GO:0016757	zinc ion binding//nucleic acid binding//transferase activity, transferring glycosyl groups	GO:0016020	membrane	--	--
Cluster-1007.18301	2040	--	--	XM_012858661.2	PREDICTED: Fundulus heteroclitus PCI domain containing 2 (pcid2), mRNA	--	--	Q5JVF3	PCI domain-containing protein 2 OS=Homo sapiens OX=9606 GN=PCID2 PE=1 SV=2	PF01399//PF01920	PCI domain//Prefoldin subunit	GO:0006457	protein folding	GO:0005515//GO:0051082	protein binding//unfolded protein binding	GO:0016272	prefoldin complex	KOG2688	Transcription-associated recombination protein - Thp1p
Cluster-1007.41724	358	--	--	LC027341.1	Haliotis diversicolor genomic DNA, BAC clone: 006_rep_c2413	--	--	--	--	--	--	--	--	--	--	--	--	--	--
Cluster-1007.18303	777	--	--	XM_007422968.2	PREDICTED: Python bivittatus PCI domain containing 2 (PCID2), transcript variant X5, mRNA	--	--	Q5JVF3	PCI domain-containing protein 2 OS=Homo sapiens OX=9606 GN=PCID2 PE=1 SV=2	PF01399	PCI domain	--	--	GO:0005515	protein binding	--	--	--	--
Cluster-1007.18302	216	--	--	--	--	--	--	--	--	PF08686//PF05353	PLAC (protease and lacunin) domain//Delta Atracotoxin	GO:0006810//GO:0009405	transport//pathogenesis	GO:0008233//GO:0019871	peptidase activity//sodium channel inhibitor activity	GO:0005576	extracellular region	--	--
Cluster-1007.41729	863	--	--	--	--	--	--	P22648	Fasciclin-2 OS=Schistocerca americana OX=7009 GN=FAS2 PE=1 SV=2	PF00041	Fibronectin type III domain	--	--	GO:0005515	protein binding	--	--	--	--
Cluster-1007.41728	1216	--	--	--	--	--	--	D3YXG0	Hemicentin-1 OS=Mus musculus OX=10090 GN=Hmcn1 PE=1 SV=1	PF13895	Immunoglobulin domain	--	--	GO:0005515	protein binding	--	--	KOG3513	Neural cell adhesion molecule L1
Cluster-1007.18309	647	--	--	--	--	--	--	--	--	--	--	--	--	--	--	--	--	--	--
Cluster-1007.18308	273	--	--	--	--	--	--	--	--	--	--	--	--	--	--	--	--	--	--
Cluster-20515.0	933	--	--	--	--	--	--	--	--	--	--	--	--	--	--	--	--	--	--
Cluster-23758.0	546	--	--	--	--	--	--	--	--	--	--	--	--	--	--	--	--	--	--
Cluster-1007.126568	650	--	--	KU096999.1	Abalone herpesvirus Taiwan/2005, complete genome	--	--	--	--	--	--	--	--	--	--	--	--	--	--
Cluster-1007.126569	3816	--	--	JN083851.1	Abalone herpesvirus Taiwan/2004, partial sequence	--	--	Q6R7C7	Uncharacterized protein ORF102 OS=Ostreid herpesvirus 1 (isolate France) OX=654903 GN=ORF102 PE=4 SV=1	--	--	--	--	--	--	--	--	--	--
Cluster-1007.126564	2194	--	--	GU995233.1	Haliotis discus hannai clone CHd744 microsatellite sequence	--	--	Q6P6S0	Synaptosomal-associated protein 47 OS=Rattus norvegicus OX=10116 GN=Snap47 PE=2 SV=1	PF04728	Lipoprotein leucine-zipper	--	--	--	--	GO:0019867	outer membrane	--	--
Cluster-1007.126565	251	--	--	--	--	--	--	--	--	--	--	--	--	--	--	--	--	--	--
Cluster-1007.5506	1171	--	--	LC027319.1	Haliotis diversicolor genomic DNA, BAC clone: 002_c19	--	--	--	--	PF15489	CST, telomere maintenance, complex subunit CTC1	--	--	GO:0003697	single-stranded DNA binding	--	--	--	--
Cluster-1007.126567	269	--	--	KU096999.1	Abalone herpesvirus Taiwan/2005, complete genome	--	--	--	--	PF01120	Alpha-L-fucosidase	GO:0005975	carbohydrate metabolic process	GO:0004560	alpha-L-fucosidase activity	--	--	--	--
Cluster-1007.126560	371	--	--	--	--	--	--	--	--	PF01146	Caveolin	GO:0070836	caveola assembly	--	--	--	--	--	--
Cluster-1007.126561	2809	--	--	KT895223.1	Haliotis discus hannai metallothionein (MT) gene, complete cds	--	--	--	--	--	--	--	--	--	--	--	--	--	--
Cluster-1007.5502	1822	--	--	LC027308.1	Haliotis diversicolor genomic DNA, BAC clone: 002_c8	--	--	--	--	--	--	--	--	--	--	--	--	--	--
Cluster-1007.126563	2162	--	--	GU995233.1	Haliotis discus hannai clone CHd744 microsatellite sequence	--	--	Q6P6S0	Synaptosomal-associated protein 47 OS=Rattus norvegicus OX=10116 GN=Snap47 PE=2 SV=1	PF04728	Lipoprotein leucine-zipper	--	--	--	--	GO:0019867	outer membrane	--	--
Cluster-34101.0	266	--	--	--	--	--	--	H2A0N9	BPTI/Kunitz domain-containing protein 4 OS=Pinctada margaritifera OX=102329 PE=1 SV=1	PF04710//PF02822//PF02069	Pellino//Antistasin family//Prokaryotic metallothionein	GO:0008063	Toll signaling pathway	GO:0046872//GO:0004867	metal ion binding//serine-type endopeptidase inhibitor activity	--	--	--	--
Cluster-39845.2	1011	--	--	--	--	--	--	--	--	--	--	--	--	--	--	--	--	--	--
Cluster-46932.0	1472	--	--	--	--	--	--	--	--	PF00989//PF04505//PF06330	PAS fold//Interferon-induced transmembrane protein//Trichodiene synthase (TRI5)	GO:0016114//GO:0016106//GO:0009607//GO:0006355	terpenoid biosynthetic process//sesquiterpenoid biosynthetic process//response to biotic stimulus//regulation of transcription, DNA-templated	GO:0045482	trichodiene synthase activity	GO:0016021	integral component of membrane	--	--
Cluster-1007.24441	983	--	--	LC027358.1	Haliotis diversicolor genomic DNA, BAC clone: 009_rep_c2377	--	--	--	--	--	--	--	--	--	--	--	--	--	--
Cluster-42026.0	1393	--	--	--	--	--	--	--	--	PF08290	Hepatitis core protein, putative zinc finger	GO:0009405	pathogenesis	GO:0005198	structural molecule activity	--	--	--	--
Cluster-1007.93392	3882	--	--	--	--	--	--	--	--	PF07127//PF06317	Late nodulin protein//Arenavirus RNA polymerase	GO:0006144//GO:0009878//GO:0019079	purine nucleobase metabolic process//nodule morphogenesis//viral genome replication	GO:0003968//GO:0046872	RNA-directed RNA polymerase activity//metal ion binding	GO:0031379	RNA-directed RNA polymerase complex	--	--
Cluster-15424.0	535	--	--	--	--	--	--	--	--	--	--	--	--	--	--	--	--	--	--
Cluster-32701.1	1052	--	--	--	--	--	--	--	--	PF06858	Nucleolar GTP-binding protein 1 (NOG1)	--	--	GO:0005525	GTP binding	--	--	--	--
Cluster-32701.0	774	--	--	--	--	--	--	--	--	--	--	--	--	--	--	--	--	--	--
Cluster-1007.142645	745	--	--	--	--	--	--	--	--	PF05767	Poxvirus virion envelope protein A14	--	--	--	--	GO:0019031	viral envelope	--	--
Cluster-24938.0	739	--	--	--	--	--	--	--	--	--	--	--	--	--	--	--	--	--	--
Cluster-6878.0	825	--	--	XM_008351345.2	PREDICTED: Malus x domestica uncharacterized LOC103412819 (LOC103412819), mRNA	--	--	P62659	30S ribosomal protein S18 OS=Thermus thermophilus (strain HB27 / ATCC BAA-163 / DSM 7039) OX=262724 GN=rpsR PE=1 SV=2	PF01084	Ribosomal protein S18	GO:0006412//GO:0042254	translation//ribosome biogenesis	GO:0003735	structural constituent of ribosome	GO:0005840//GO:0005622	ribosome//intracellular	--	--
Cluster-1007.115417	1697	--	--	--	--	--	--	--	--	PF07649//PF00020//PF01623//PF00130	C1-like domain//TNFR/NGFR cysteine-rich region//Carlavirus putative nucleic acid binding protein//Phorbol esters/diacylglycerol binding domain (C1 domain)	GO:0035556//GO:0055114//GO:0006355	intracellular signal transduction//oxidation-reduction process//regulation of transcription, DNA-templated	GO:0003676//GO:0005515//GO:0047134	nucleic acid binding//protein binding//protein-disulfide reductase activity	--	--	--	--
Cluster-1007.115414	979	--	--	--	--	--	--	--	--	PF11057	Cortexin of kidney	--	--	--	--	GO:0031224	intrinsic component of membrane	--	--
Cluster-1007.115415	565	--	--	--	--	--	--	--	--	--	--	--	--	--	--	--	--	--	--
Cluster-1007.115412	1605	--	--	XM_004382246.2	PREDICTED: Trichechus manatus latirostris replication factor C subunit 4 (LOC101352469), mRNA	K10755	replication factor C subunit 2/4	Q99J62	Replication factor C subunit 4 OS=Mus musculus OX=10090 GN=Rfc4 PE=1 SV=1	PF00004//PF06144	ATPase family associated with various cellular activities (AAA)//DNA polymerase III, delta subunit	GO:0006260	DNA replication	GO:0003677//GO:0005524//GO:0003887	DNA binding//ATP binding//DNA-directed DNA polymerase activity	GO:0009360//GO:0042575	DNA polymerase III complex//DNA polymerase complex	KOG0989	Replication factor C, subunit RFC4
Cluster-1007.115413	598	--	--	HQ650305.1	Haliotis diversicolor clone Hdi406 microsatellite sequence	--	--	--	--	--	--	--	--	--	--	--	--	--	--
Cluster-1007.115410	574	--	--	--	--	--	--	--	--	--	--	--	--	--	--	--	--	--	--
Cluster-1007.115411	2287	--	--	XM_004382246.2	PREDICTED: Trichechus manatus latirostris replication factor C subunit 4 (LOC101352469), mRNA	K10755	replication factor C subunit 2/4	Q99J62	Replication factor C subunit 4 OS=Mus musculus OX=10090 GN=Rfc4 PE=1 SV=1	PF07728//PF06144//PF00004//PF02562//PF05496	AAA domain (dynein-related subfamily)//DNA polymerase III, delta subunit//ATPase family associated with various cellular activities (AAA)//PhoH-like protein//Holliday junction DNA helicase ruvB N-terminus	GO:0006260//GO:0006310//GO:0006281	DNA replication//DNA recombination//DNA repair	GO:0003887//GO:0003677//GO:0016887//GO:0009378//GO:0005524	DNA-directed DNA polymerase activity//DNA binding//ATPase activity//four-way junction helicase activity//ATP binding	GO:0009360//GO:0009379//GO:0042575//GO:0005657	DNA polymerase III complex//Holliday junction helicase complex//DNA polymerase complex//replication fork	KOG0989	Replication factor C, subunit RFC4
Cluster-1007.93397	7018	--	--	HQ650425.1	Haliotis diversicolor clone Hdi34 microsatellite sequence	K19608	ellis van creveld syndrome protein 2	Q86UK5	Limbin OS=Homo sapiens OX=9606 GN=EVC2 PE=1 SV=1	PF12297//PF07967//PF02443	Ellis van Creveld protein 2 like protein//C3HC zinc finger-like//Circovirus capsid protein	GO:0007224//GO:0019069	smoothened signaling pathway//viral capsid assembly	GO:0008270	zinc ion binding	GO:0042025//GO:0005634	host cell nucleus//nucleus	--	--
Cluster-31293.0	431	--	--	--	--	--	--	--	--	--	--	--	--	--	--	--	--	--	--
Cluster-1007.115418	254	--	--	--	--	--	--	--	--	--	--	--	--	--	--	--	--	--	--
Cluster-1007.142642	341	--	--	KU096999.1	Abalone herpesvirus Taiwan/2005, complete genome	--	--	--	--	PF07174	Fibronectin-attachment protein (FAP)	--	--	GO:0050840	extracellular matrix binding	GO:0005576	extracellular region	--	--
Cluster-1007.24447	440	--	--	LC027358.1	Haliotis diversicolor genomic DNA, BAC clone: 009_rep_c2377	--	--	--	--	--	--	--	--	--	--	--	--	--	--
Cluster-1007.93394	230	--	--	--	--	--	--	--	--	--	--	--	--	--	--	--	--	--	--
Cluster-31790.0	1817	--	--	LC027307.1	Haliotis diversicolor genomic DNA, BAC clone: 002_c7	--	--	--	--	--	--	--	--	--	--	--	--	--	--
Cluster-31790.1	1813	--	--	LC027307.1	Haliotis diversicolor genomic DNA, BAC clone: 002_c7	--	--	--	--	PF15957	Commissureless	GO:0007411	axon guidance	--	--	--	--	--	--
Cluster-46222.0	949	--	--	GQ927124.1	Haliotis midae microsatellite Hmid2015M sequence	--	--	--	--	--	--	--	--	--	--	--	--	--	--
Cluster-46222.1	1442	--	--	--	--	--	--	--	--	--	--	--	--	--	--	--	--	--	--
Cluster-15211.0	685	--	--	LM125436.1	Taenia asiatica genome assembly T_asiatica_South_Korea ,scaffold TASK_scaffold0000236	K01365	cathepsin L	P09648	Cathepsin L1 (Fragments) OS=Gallus gallus OX=9031 GN=CTSL PE=1 SV=1	PF00112//PF03051	Papain family cysteine protease//Peptidase C1-like family	GO:0006508	proteolysis	GO:0008234//GO:0004197	cysteine-type peptidase activity//cysteine-type endopeptidase activity	--	--	KOG1543	Cysteine proteinase Cathepsin L
Cluster-5973.0	962	--	--	--	--	--	--	--	--	PF03744	6-carboxyhexanoate--CoA ligase	GO:0006768//GO:0009102	biotin metabolic process//biotin biosynthetic process	GO:0005524//GO:0042410	ATP binding//6-carboxyhexanoate-CoA ligase activity	--	--	--	--
Cluster-38649.0	333	--	--	--	--	--	--	--	--	--	--	--	--	--	--	--	--	--	--
Cluster-15372.0	707	--	--	--	--	--	--	--	--	--	--	--	--	--	--	--	--	--	--
Cluster-1007.121033	5010	--	--	FJ607698.1	Haliotis diversicolor microsatellite HUHD16 sequence	K10277	lysine-specific demethylase 8	--	--	PF13833//PF13405//PF13499//PF13202//PF00036	EF-hand domain pair//EF-hand domain//EF-hand domain pair//EF hand//EF hand	--	--	GO:0005509	calcium ion binding	--	--	--	--
Cluster-5632.0	711	--	--	XM_008353431.2	PREDICTED: Malus x domestica probable polyamine transporter At3g13620 (LOC103415069), mRNA	--	--	Q9LHN7	Probable polyamine transporter At3g13620 OS=Arabidopsis thaliana OX=3702 GN=At3g13620 PE=2 SV=1	PF00324//PF13520	Amino acid permease//Amino acid permease	GO:0003333//GO:0006865//GO:0055085//GO:0006810	amino acid transmembrane transport//amino acid transport//transmembrane transport//transport	GO:0015171	amino acid transmembrane transporter activity	GO:0016020	membrane	--	--
Cluster-1007.121031	521	--	--	--	--	--	--	--	--	--	--	--	--	--	--	--	--	--	--
Cluster-1007.121030	4857	--	--	FJ607698.1	Haliotis diversicolor microsatellite HUHD16 sequence	K10277	lysine-specific demethylase 8	--	--	PF13833//PF00036//PF13405//PF13202//PF13499	EF-hand domain pair//EF hand//EF-hand domain//EF hand//EF-hand domain pair	--	--	GO:0005509	calcium ion binding	--	--	--	--
Cluster-1007.121037	408	--	--	JQ906782.1	Haliotis diversicolor hypothetical protein gene, complete cds	--	--	--	--	--	--	--	--	--	--	--	--	--	--
Cluster-1007.121036	518	--	--	--	--	--	--	--	--	--	--	--	--	--	--	--	--	--	--
Cluster-1007.121035	442	--	--	--	--	--	--	--	--	--	--	--	--	--	--	--	--	--	--
Cluster-1007.121034	2113	--	--	XM_017465761.1	PREDICTED: Ictalurus punctatus unc-51 like kinase 3 (ulk3), mRNA	K08269	serine/threonine-protein kinase ULK/ATG1	D3ZHP7	Serine/threonine-protein kinase ULK3 OS=Rattus norvegicus OX=10116 GN=Ulk3 PE=1 SV=1	PF16785//PF07714//PF00515//PF00069//PF13414//PF13176//PF06293	Small metal-binding protein//Protein tyrosine kinase//Tetratricopeptide repeat//Protein kinase domain//TPR repeat//Tetratricopeptide repeat//Lipopolysaccharide kinase (Kdo/WaaP) family	GO:0006468	protein phosphorylation	GO:0046872//GO:0004672//GO:0005524//GO:0005515//GO:0016773	metal ion binding//protein kinase activity//ATP binding//protein binding//phosphotransferase activity, alcohol group as acceptor	GO:0016020	membrane	KOG0595	Serine/threonine-protein kinase involved in autophagy
Cluster-1007.121039	5534	--	--	--	--	--	--	Q5ZM71	Transcription factor SPT20 homolog OS=Gallus gallus OX=9031 GN=SUPT20H PE=2 SV=1	PF12090	Spt20 family	--	--	GO:0003712	transcription cofactor activity	GO:0000124//GO:0005667	SAGA complex//transcription factor complex	--	--
Cluster-1007.121038	467	--	--	--	--	--	--	--	--	--	--	--	--	--	--	--	--	--	--
Cluster-3032.0	229	--	--	--	--	--	--	--	--	PF04263	Thiamin pyrophosphokinase, catalytic domain	GO:0006772//GO:0009229	thiamine metabolic process//thiamine diphosphate biosynthetic process	GO:0005524//GO:0004788	ATP binding//thiamine diphosphokinase activity	--	--	--	--
Cluster-1007.116145	575	--	--	HQ650293.1	Haliotis diversicolor clone Hdi155 microsatellite sequence	--	--	--	--	--	--	--	--	--	--	--	--	--	--
Cluster-1007.116144	1358	--	--	HQ650293.1	Haliotis diversicolor clone Hdi155 microsatellite sequence	--	--	--	--	--	--	--	--	--	--	--	--	--	--
Cluster-1007.116147	384	--	--	--	--	--	--	--	--	--	--	--	--	--	--	--	--	--	--
Cluster-1007.116146	3015	--	--	--	--	--	--	--	--	--	--	--	--	--	--	--	--	--	--
Cluster-1007.116141	3009	--	--	--	--	--	--	--	--	--	--	--	--	--	--	--	--	--	--
Cluster-1007.91691	1509	--	--	KX639426.1	Haliotis discus discus cathepsin Z (CTSZ) gene, complete cds	--	--	--	--	--	--	--	--	--	--	--	--	--	--
Cluster-1007.116143	1562	--	--	HQ650293.1	Haliotis diversicolor clone Hdi155 microsatellite sequence	--	--	--	--	--	--	--	--	--	--	--	--	--	--
Cluster-1007.116142	2975	--	--	--	--	--	--	--	--	--	--	--	--	--	--	--	--	--	--
Cluster-1007.77917	475	--	--	--	--	--	--	--	--	--	--	--	--	--	--	--	--	--	--
Cluster-1007.77916	400	--	--	--	--	--	--	--	--	PF01393	Chromo shadow domain	--	--	--	--	GO:0005634	nucleus	--	--
Cluster-1007.77915	331	--	--	--	--	--	--	Q9XWD6	Cell death abnormality protein 1 OS=Caenorhabditis elegans OX=6239 GN=ced-1 PE=1 SV=1	--	--	--	--	--	--	--	--	--	--
Cluster-1007.77914	249	--	--	--	--	K11420	euchromatic histone-lysine N-methyltransferase	Q6F6B3	Protein TANC1 OS=Rattus norvegicus OX=10116 GN=Tanc1 PE=1 SV=1	PF13606//PF00023	Ankyrin repeat//Ankyrin repeat	--	--	GO:0005515	protein binding	--	--	--	--
Cluster-1007.116149	4983	--	--	XM_012870040.2	PREDICTED: Fundulus heteroclitus zinc finger protein 367 (znf367), mRNA	--	--	Q5U2Z0	Zinc finger protein 367 OS=Rattus norvegicus OX=10116 GN=Znf367 PE=2 SV=1	PF13912//PF00096//PF02176//PF04805//PF13465	C2H2-type zinc finger//Zinc finger, C2H2 type//TRAF-type zinc finger//E10-like protein conserved region//Zinc-finger double domain	GO:0055114	oxidation-reduction process	GO:0008270//GO:0016972//GO:0046872	zinc ion binding//thiol oxidase activity//metal ion binding	--	--	--	--
Cluster-1007.116148	1212	--	--	LC027303.1	Haliotis diversicolor genomic DNA, BAC clone: 002_c3	--	--	--	--	--	--	--	--	--	--	--	--	--	--
Cluster-1007.77911	638	--	--	--	--	--	--	--	--	--	--	--	--	--	--	--	--	--	--
Cluster-1007.77910	307	--	--	--	--	--	--	Q8Q0U0	Putative ankyrin repeat protein MM_0045 OS=Methanosarcina mazei (strain ATCC BAA-159 / DSM 3647 / Goe1 / Go1 / JCM 11833 / OCM 88) OX=192952 GN=MM_0045 PE=4 SV=1	PF13606//PF00023	Ankyrin repeat//Ankyrin repeat	--	--	GO:0005515	protein binding	--	--	--	--
Cluster-1007.92386	3561	--	--	XM_020930942.1	PREDICTED: Boleophthalmus pectinirostris receptor-type tyrosine-protein phosphatase gamma-like (LOC110165754), mRNA	K06776	receptor-type tyrosine-protein phosphatase kappa	Q15262	Receptor-type tyrosine-protein phosphatase kappa OS=Homo sapiens OX=9606 GN=PTPRK PE=1 SV=2	PF06003//PF00782//PF01599//PF00102	Survival motor neuron protein (SMN)//Dual specificity phosphatase, catalytic domain//Ribosomal protein S27a//Protein-tyrosine phosphatase	GO:0006412//GO:0006470//GO:0006570//GO:0042254//GO:0006397	translation//protein dephosphorylation//tyrosine metabolic process//ribosome biogenesis//mRNA processing	GO:0004725//GO:0008138//GO:0003735//GO:0003723	protein tyrosine phosphatase activity//protein tyrosine/serine/threonine phosphatase activity//structural constituent of ribosome//RNA binding	GO:0005840//GO:0005737//GO:0005634	ribosome//cytoplasm//nucleus	--	--
Cluster-26124.0	659	--	--	--	--	--	--	--	--	--	--	--	--	--	--	--	--	--	--
Cluster-27882.0	649	--	--	--	--	--	--	--	--	PF00784	MyTH4 domain	--	--	--	--	GO:0005856	cytoskeleton	--	--
Cluster-46942.4	1161	--	--	--	--	--	--	--	--	--	--	--	--	--	--	--	--	--	--
Cluster-1007.46841	449	--	--	--	--	--	--	--	--	--	--	--	--	--	--	--	--	--	--
Cluster-1007.46840	7885	--	--	--	--	--	--	Q95SX7	Probable RNA-directed DNA polymerase from transposon BS OS=Drosophila melanogaster OX=7227 GN=RTase PE=2 SV=1	--	--	--	--	--	--	--	--	--	--
Cluster-1007.46843	1369	--	--	--	--	--	--	--	--	--	--	--	--	--	--	--	--	--	--
Cluster-1007.46842	7646	--	--	--	--	--	--	Q95SX7	Probable RNA-directed DNA polymerase from transposon BS OS=Drosophila melanogaster OX=7227 GN=RTase PE=2 SV=1	--	--	--	--	--	--	--	--	--	--
Cluster-1007.46845	2491	--	--	--	--	--	--	--	--	PF14980	TIP39 peptide	GO:0007218	neuropeptide signaling pathway	--	--	GO:0005576	extracellular region	--	--
Cluster-1007.46844	1275	--	--	--	--	--	--	--	--	--	--	--	--	--	--	--	--	--	--
Cluster-1007.46847	2472	--	--	--	--	--	--	--	--	PF02891	MIZ/SP-RING zinc finger	--	--	GO:0008270	zinc ion binding	--	--	--	--
Cluster-1007.46846	541	--	--	LC027294.1	Haliotis diversicolor genomic DNA, BAC clone: 001_rep_c977	--	--	--	--	--	--	--	--	--	--	--	--	--	--
Cluster-1007.46849	995	--	--	--	--	--	--	--	--	--	--	--	--	--	--	--	--	--	--
Cluster-1007.46848	1550	--	--	LC027339.1	Haliotis diversicolor genomic DNA, BAC clone: 006_rep_c2411	--	--	--	--	--	--	--	--	--	--	--	--	--	--
Cluster-1007.83275	394	--	--	--	--	--	--	Q9XWD6	Cell death abnormality protein 1 OS=Caenorhabditis elegans OX=6239 GN=ced-1 PE=1 SV=1	PF01414	Delta serrate ligand	GO:0007154	cell communication	--	--	GO:0016020	membrane	KOG1218	Proteins containing Ca2+-binding EGF-like domains
Cluster-1007.83274	1652	--	--	--	--	--	--	--	--	--	--	--	--	--	--	--	--	--	--
Cluster-1007.83277	232	--	--	--	--	--	--	Q9XWD6	Cell death abnormality protein 1 OS=Caenorhabditis elegans OX=6239 GN=ced-1 PE=1 SV=1	--	--	--	--	--	--	--	--	--	--
Cluster-1007.34118	4911	--	--	--	--	--	--	--	--	PF09726	Transmembrane protein	--	--	--	--	GO:0016021	integral component of membrane	--	--
Cluster-1007.83271	1974	--	--	--	--	--	--	--	--	--	--	--	--	--	--	--	--	--	--
Cluster-1007.83270	625	--	--	KU351386.1	Haliotis discus discus galectin-4 gene, complete cds	--	--	--	--	--	--	--	--	--	--	--	--	--	--
Cluster-1007.83273	1242	--	--	--	--	K18588	coenzyme Q-binding protein COQ10	Q9H8M1	Coenzyme Q-binding protein COQ10 homolog B, mitochondrial OS=Homo sapiens OX=9606 GN=COQ10B PE=2 SV=1	--	--	--	--	--	--	--	--	KOG3177	Oligoketide cyclase/lipid transport protein
Cluster-1007.83272	256	--	--	LC027332.1	Haliotis diversicolor genomic DNA, BAC clone: 004_rep_c861	--	--	--	--	--	--	--	--	--	--	--	--	--	--
Cluster-1007.83279	1614	--	--	--	--	--	--	--	--	PF13833//PF12763//PF00036//PF13202//PF13499//PF13405	EF-hand domain pair//Cytoskeletal-regulatory complex EF hand//EF hand//EF hand//EF-hand domain pair//EF-hand domain	--	--	GO:0005509//GO:0005515	calcium ion binding//protein binding	--	--	--	--
Cluster-1007.83278	1627	--	--	--	--	--	--	--	--	PF12763//PF13833//PF00036//PF13202//PF13405//PF13499	Cytoskeletal-regulatory complex EF hand//EF-hand domain pair//EF hand//EF hand//EF-hand domain//EF-hand domain pair	--	--	GO:0005509//GO:0005515	calcium ion binding//protein binding	--	--	--	--
Cluster-32628.0	2526	--	--	--	--	--	--	Q9UPV0	Centrosomal protein of 164 kDa OS=Homo sapiens OX=9606 GN=CEP164 PE=1 SV=3	PF00854	POT family	GO:0006810	transport	GO:0005215	transporter activity	GO:0016020	membrane	--	--
Cluster-19415.0	487	--	--	--	--	--	--	--	--	--	--	--	--	--	--	--	--	--	--
Cluster-17812.0	481	--	--	--	--	--	--	--	--	--	--	--	--	--	--	--	--	--	--
Cluster-1007.34119	1896	--	--	--	--	--	--	--	--	--	--	--	--	--	--	--	--	--	--
Cluster-8378.0	776	--	--	--	--	--	--	--	--	PF01146	Caveolin	GO:0070836	caveola assembly	--	--	--	--	--	--
Cluster-11647.0	465	--	--	--	--	--	--	--	--	--	--	--	--	--	--	--	--	--	--
Cluster-1007.117131	1462	--	--	--	--	--	--	--	--	--	--	--	--	--	--	--	--	--	--
Cluster-17220.0	738	--	--	--	--	--	--	--	--	--	--	--	--	--	--	--	--	--	--
Cluster-41056.0	383	--	--	--	--	--	--	--	--	--	--	--	--	--	--	--	--	--	--
Cluster-548.0	727	--	--	--	--	--	--	--	--	--	--	--	--	--	--	--	--	--	--
Cluster-8243.0	710	--	--	--	--	--	--	--	--	--	--	--	--	--	--	--	--	--	--
Cluster-1007.30093	1046	--	--	--	--	--	--	--	--	--	--	--	--	--	--	--	--	--	--
Cluster-1007.30092	4929	--	--	XM_014334776.1	PREDICTED: Haplochromis burtoni helicase-like transcription factor (hltf), transcript variant X3, mRNA	K15711	SWI/SNF-related matrix-associated actin-dependent regulator of chromatin subfamily A3	Q14527	Helicase-like transcription factor OS=Homo sapiens OX=9606 GN=HLTF PE=1 SV=2	PF17123//PF12678//PF13639//PF00097//PF12861//PF14634//PF11789//PF00176//PF16685//PF10541//PF08797	RING-like zinc finger//RING-H2 zinc finger//Ring finger domain//Zinc finger, C3HC4 type (RING finger)//Anaphase-promoting complex subunit 11 RING-H2 finger//zinc-RING finger domain//Zinc-finger of the MIZ type in Nse subunit//SNF2 family N-terminal domain//zinc RING finger of MSL2//Nuclear envelope localisation domain//HIRAN domain	GO:0016567	protein ubiquitination	GO:0005515//GO:0003676//GO:0004842//GO:0016818//GO:0005524//GO:0008270//GO:0046872//GO:0061630	protein binding//nucleic acid binding//ubiquitin-protein transferase activity//hydrolase activity, acting on acid anhydrides, in phosphorus-containing anhydrides//ATP binding//zinc ion binding//metal ion binding//ubiquitin protein ligase activity	GO:0005680//GO:0016021	anaphase-promoting complex//integral component of membrane	KOG1001	Helicase-like transcription factor HLTF/DNA helicase RAD5, DEAD-box superfamily
Cluster-1007.30091	4909	--	--	XM_014334776.1	PREDICTED: Haplochromis burtoni helicase-like transcription factor (hltf), transcript variant X3, mRNA	K15711	SWI/SNF-related matrix-associated actin-dependent regulator of chromatin subfamily A3	Q14527	Helicase-like transcription factor OS=Homo sapiens OX=9606 GN=HLTF PE=1 SV=2	PF17123//PF12678//PF13639//PF12861//PF14634//PF00097//PF11789//PF10541//PF08797//PF00176//PF16685	RING-like zinc finger//RING-H2 zinc finger//Ring finger domain//Anaphase-promoting complex subunit 11 RING-H2 finger//zinc-RING finger domain//Zinc finger, C3HC4 type (RING finger)//Zinc-finger of the MIZ type in Nse subunit//Nuclear envelope localisation domain//HIRAN domain//SNF2 family N-terminal domain//zinc RING finger of MSL2	GO:0016567	protein ubiquitination	GO:0003676//GO:0005515//GO:0004842//GO:0016818//GO:0008270//GO:0005524//GO:0046872//GO:0061630	nucleic acid binding//protein binding//ubiquitin-protein transferase activity//hydrolase activity, acting on acid anhydrides, in phosphorus-containing anhydrides//zinc ion binding//ATP binding//metal ion binding//ubiquitin protein ligase activity	GO:0005680//GO:0016021	anaphase-promoting complex//integral component of membrane	KOG1001	Helicase-like transcription factor HLTF/DNA helicase RAD5, DEAD-box superfamily
Cluster-1007.30090	297	--	--	AY013579.1	Haliotis kamtschatkana clone Hka56 microsatellite sequence	--	--	--	--	--	--	--	--	--	--	--	--	--	--
Cluster-1007.30097	1619	--	--	--	--	--	--	--	--	--	--	--	--	--	--	--	--	--	--
Cluster-1007.30096	1496	--	--	--	--	--	--	--	--	--	--	--	--	--	--	--	--	--	--
Cluster-1007.30095	966	--	--	LC027332.1	Haliotis diversicolor genomic DNA, BAC clone: 004_rep_c861	--	--	--	--	--	--	--	--	--	--	--	--	--	--
Cluster-1007.30094	925	--	--	--	--	--	--	--	--	--	--	--	--	--	--	--	--	--	--
Cluster-1007.30099	4432	--	--	--	--	K10703	very-long-chain (3R)-3-hydroxyacyl-CoA dehydratase	A7YY55	Very-long-chain (3R)-3-hydroxyacyl-CoA dehydratase 3 OS=Bos taurus OX=9913 GN=HACD3 PE=2 SV=1	PF15723	Motility quorum-sensing regulator, toxin of MqsA	GO:0017148//GO:0009372//GO:0042710	negative regulation of translation//quorum sensing//biofilm formation	--	--	--	--	KOG3187	Protein tyrosine phosphatase-like protein PTPLA (contains Pro instead of catalytic Arg)
Cluster-1007.30098	565	--	--	--	--	--	--	--	--	--	--	--	--	--	--	--	--	--	--
Cluster-1007.7124	1106	--	--	JQ906782.1	Haliotis diversicolor hypothetical protein gene, complete cds	--	--	--	--	--	--	--	--	--	--	--	--	--	--
Cluster-1007.7125	463	--	--	--	--	--	--	--	--	--	--	--	--	--	--	--	--	--	--
Cluster-1007.84728	372	--	--	--	--	--	--	--	--	--	--	--	--	--	--	--	--	--	--
Cluster-1007.7127	485	--	--	--	--	--	--	--	--	--	--	--	--	--	--	--	--	--	--
Cluster-1007.7120	1546	--	--	--	--	--	--	--	--	--	--	--	--	--	--	--	--	--	--
Cluster-1007.7121	803	--	--	--	--	--	--	--	--	--	--	--	--	--	--	--	--	--	--
Cluster-1007.7122	2211	--	--	KJ160125.1	Haliotis tuberculata tuberculata microsatellite Haltub163 sequence	--	--	--	--	--	--	--	--	--	--	--	--	--	--
Cluster-1007.7123	2240	--	--	XM_011432969.2	PREDICTED: Crassostrea gigas anoctamin-4 (LOC105330982), transcript variant X4, mRNA	--	--	Q6IFT6	Anoctamin-7 OS=Rattus norvegicus OX=10116 GN=Ano7 PE=2 SV=1	PF16178	Dimerisation domain of Ca+-activated chloride-channel, anoctamin	--	--	GO:0046983	protein dimerization activity	--	--	KOG2514	Uncharacterized conserved protein
Cluster-1007.84722	298	--	--	AY043205.1	Haliotis rubra ATPase alpha subunit (ATPSalpha) gene, partial sequence	--	--	--	--	--	--	--	--	--	--	--	--	--	--
Cluster-1007.84723	2456	--	--	AF302830.1	Haliotis rubra clone 2.20 microsatellite VNTR sequence	--	--	--	--	--	--	--	--	--	--	--	--	--	--
Cluster-1007.84720	1180	--	--	LC027345.1	Haliotis diversicolor genomic DNA, BAC clone: 006_rep_c2417	--	--	--	--	--	--	--	--	--	--	--	--	--	--
Cluster-1007.84721	204	--	--	KT336367.1	Haliotis discus discus signal transducer and activator of transcription 5 (STAT5) gene, complete cds	--	--	--	--	--	--	--	--	--	--	--	--	--	--
Cluster-1007.7128	979	--	--	--	--	--	--	--	--	PF01213	Adenylate cyclase associated (CAP) N terminal	GO:0007010	cytoskeleton organization	GO:0003779	actin binding	--	--	--	--
Cluster-1007.7129	688	--	--	--	--	--	--	--	--	PF03325	Herpesvirus polymerase accessory protein	GO:0006260//GO:0019079	DNA replication//viral genome replication	GO:0030337	DNA polymerase processivity factor activity	GO:0042575	DNA polymerase complex	--	--
Cluster-1007.120784	541	--	--	--	--	--	--	--	--	--	--	--	--	--	--	--	--	--	--
Cluster-1007.84725	2817	--	--	--	--	--	--	Q19673	Putative tyrosinase-like protein tyr-3 OS=Caenorhabditis elegans OX=6239 GN=tyr-3 PE=3 SV=5	PF01607//PF03427//PF00264	Chitin binding Peritrophin-A domain//Carbohydrate binding domain (family 19)//Common central domain of tyrosinase	GO:0006030//GO:0008152//GO:0006032	chitin metabolic process//metabolic process//chitin catabolic process	GO:0016491//GO:0008061	oxidoreductase activity//chitin binding	GO:0005576	extracellular region	--	--
Cluster-32186.10	1087	--	--	--	--	--	--	--	--	--	--	--	--	--	--	--	--	--	--
Cluster-2336.0	572	--	--	LC027297.1	Haliotis diversicolor genomic DNA, BAC clone: 001_rep_c980	--	--	--	--	--	--	--	--	--	--	--	--	--	--
Cluster-1007.20862	1336	--	--	XM_014617349.1	PREDICTED: Dinoponera quadriceps aspartate--tRNA ligase, mitochondrial (LOC106743478), mRNA	K01876	aspartyl-tRNA synthetase	A6QPU5	Aspartate--tRNA ligase, mitochondrial OS=Bos taurus OX=9913 GN=DARS2 PE=2 SV=1	PF03525//PF00152//PF01336	Meiotic recombination protein rec114//tRNA synthetases class II (D, K and N)//OB-fold nucleic acid binding domain	GO:0006418//GO:0007131	tRNA aminoacylation for protein translation//reciprocal meiotic recombination	GO:0003676//GO:0000166//GO:0005524//GO:0004812	nucleic acid binding//nucleotide binding//ATP binding//aminoacyl-tRNA ligase activity	--	--	KOG2411	Aspartyl-tRNA synthetase, mitochondrial
Cluster-1007.20861	2601	--	--	XM_014617349.1	PREDICTED: Dinoponera quadriceps aspartate--tRNA ligase, mitochondrial (LOC106743478), mRNA	K01876	aspartyl-tRNA synthetase	A6QPU5	Aspartate--tRNA ligase, mitochondrial OS=Bos taurus OX=9913 GN=DARS2 PE=2 SV=1	PF01409//PF01336//PF03525//PF00152	tRNA synthetases class II core domain (F)//OB-fold nucleic acid binding domain//Meiotic recombination protein rec114//tRNA synthetases class II (D, K and N)	GO:0043039//GO:0006418//GO:0007131	tRNA aminoacylation//tRNA aminoacylation for protein translation//reciprocal meiotic recombination	GO:0000166//GO:0003676//GO:0005524//GO:0004812//GO:0000049	nucleotide binding//nucleic acid binding//ATP binding//aminoacyl-tRNA ligase activity//tRNA binding	GO:0005737	cytoplasm	KOG2411	Aspartyl-tRNA synthetase, mitochondrial
Cluster-1007.86388	1090	--	--	--	--	--	--	--	--	--	--	--	--	--	--	--	--	--	--
Cluster-1007.20860	571	--	--	--	--	--	--	--	--	--	--	--	--	--	--	--	--	--	--
Cluster-40770.0	533	--	--	LC027326.1	Haliotis diversicolor genomic DNA, BAC clone: 003_rep_c698	--	--	--	--	--	--	--	--	--	--	--	--	--	--
Cluster-1007.86382	2599	--	--	--	--	--	--	--	--	PF14719	Phosphotyrosine interaction domain (PTB/PID)	--	--	GO:0005515	protein binding	--	--	--	--
Cluster-1007.86383	455	--	--	--	--	--	--	--	--	--	--	--	--	--	--	--	--	--	--
Cluster-1007.86380	3561	--	--	--	--	--	--	--	--	PF03083	Sugar efflux transporter for intercellular exchange	--	--	--	--	GO:0016021	integral component of membrane	--	--
Cluster-1007.86381	1931	--	--	--	--	--	--	--	--	--	--	--	--	--	--	--	--	--	--
Cluster-1007.86386	8928	--	--	--	--	--	--	Q3UHR0	BAH and coiled-coil domain-containing protein 1 OS=Mus musculus OX=10090 GN=Bahcc1 PE=2 SV=2	PF01426	BAH domain	--	--	GO:0003682	chromatin binding	GO:0000785	chromatin	KOG1886	BAH domain proteins
Cluster-1007.86387	354	--	--	--	--	--	--	--	--	--	--	--	--	--	--	--	--	--	--
Cluster-1007.86384	4977	--	--	--	--	--	--	Q9D311	Dual oxidase maturation factor 2 OS=Mus musculus OX=10090 GN=Duoxa2 PE=2 SV=1	PF10204//PF02083	Dual oxidase maturation factor//Urotensin II	GO:0008217//GO:0015031//GO:0042312//GO:0007165	regulation of blood pressure//protein transport//regulation of vasodilation//signal transduction	GO:0005179	hormone activity	GO:0005789//GO:0016021//GO:0005576	endoplasmic reticulum membrane//integral component of membrane//extracellular region	--	--
Cluster-1007.86385	9368	--	--	--	--	--	--	Q3UHR0	BAH and coiled-coil domain-containing protein 1 OS=Mus musculus OX=10090 GN=Bahcc1 PE=2 SV=2	PF01426	BAH domain	--	--	GO:0003682	chromatin binding	GO:0000785	chromatin	KOG1886	BAH domain proteins
Cluster-32186.16	1922	--	--	--	--	--	--	Q9UQC9	Calcium-activated chloride channel regulator 2 OS=Homo sapiens OX=9606 GN=CLCA2 PE=1 SV=2	PF00041	Fibronectin type III domain	--	--	GO:0005515	protein binding	--	--	--	--
Cluster-36631.0	637	--	--	--	--	--	--	--	--	--	--	--	--	--	--	--	--	--	--
Cluster-32186.17	2490	--	--	--	--	--	--	P54281	Calcium-activated chloride channel regulator 1 OS=Bos taurus OX=9913 PE=1 SV=1	PF00041	Fibronectin type III domain	--	--	GO:0005515	protein binding	--	--	--	--
Cluster-31798.0	1100	--	--	--	--	--	--	--	--	--	--	--	--	--	--	--	--	--	--
Cluster-45537.0	916	--	--	--	--	--	--	--	--	--	--	--	--	--	--	--	--	--	--
Cluster-14544.0	570	--	--	--	--	--	--	--	--	--	--	--	--	--	--	--	--	--	--
Cluster-38205.2	478	--	--	JQ906782.1	Haliotis diversicolor hypothetical protein gene, complete cds	--	--	--	--	--	--	--	--	--	--	--	--	--	--
Cluster-1007.67505	315	--	--	FJ607698.1	Haliotis diversicolor microsatellite HUHD16 sequence	--	--	--	--	--	--	--	--	--	--	--	--	--	--
Cluster-1007.67504	3171	--	--	LC027342.1	Haliotis diversicolor genomic DNA, BAC clone: 006_rep_c2414	K08136	sparc/osteonectin, cwcv and kazal-like domains proteoglycan (testican)	Q9VCR3	Proteoglycan Cow OS=Drosophila melanogaster OX=7227 GN=Cow PE=1 SV=3	PF13499//PF00036//PF10591	EF-hand domain pair//EF hand//Secreted protein acidic and rich in cysteine Ca binding region	GO:0007165	signal transduction	GO:0005509	calcium ion binding	GO:0005578	proteinaceous extracellular matrix	KOG3555	Ca2+-binding proteoglycan Testican
Cluster-1007.67507	1536	--	--	LC027342.1	Haliotis diversicolor genomic DNA, BAC clone: 006_rep_c2414	--	--	--	--	--	--	--	--	--	--	--	--	--	--
Cluster-1007.67506	230	--	--	KP203958.1	Abalone herpesvirus type 2 Taiwan/2007 DNA packaging tegument-like protein gene, complete cds	--	--	--	--	--	--	--	--	--	--	--	--	--	--
Cluster-2827.0	632	--	--	--	--	--	--	--	--	--	--	--	--	--	--	--	--	--	--
Cluster-1007.67500	1094	--	--	--	--	--	--	--	--	PF01112//PF01036//PF01436	Asparaginase//Bacteriorhodopsin-like protein//NHL repeat	--	--	GO:0016787//GO:0005515	hydrolase activity//protein binding	GO:0016020	membrane	--	--
Cluster-1007.67503	3367	--	--	LC027342.1	Haliotis diversicolor genomic DNA, BAC clone: 006_rep_c2414	--	--	O70333	Cysteine-rich PDZ-binding protein OS=Mus musculus OX=10090 GN=Cript PE=1 SV=1	PF02438//PF01020	Late 100kD protein//Ribosomal L40e family	GO:0019060//GO:0006412//GO:0042254	intracellular transport of viral protein in host cell//translation//ribosome biogenesis	GO:0003735	structural constituent of ribosome	GO:0005840	ribosome	KOG3476	Microtubule-associated protein CRIPT
Cluster-1007.67502	1697	--	--	LC027350.1	Haliotis diversicolor genomic DNA, BAC clone: 008_rep_c1012	--	--	--	--	--	--	--	--	--	--	--	--	--	--
Cluster-1007.87033	723	--	--	--	--	--	--	--	--	PF00487	Fatty acid desaturase	GO:0006629	lipid metabolic process	--	--	--	--	--	--
Cluster-1007.87032	4058	--	--	XM_009058286.1	Lottia gigantea hypothetical protein mRNA	K06571	tetraspanin-7	Q7YQL0	Tetraspanin-7 OS=Pan troglodytes OX=9598 GN=TSPAN7 PE=2 SV=1	PF00335//PF13903	Tetraspanin family//PMP-22/EMP/MP20/Claudin tight junction	--	--	--	--	GO:0016021	integral component of membrane	--	--
Cluster-1007.87031	2813	--	--	--	--	--	--	Q6NT76	Homeobox-containing protein 1 OS=Homo sapiens OX=9606 GN=HMBOX1 PE=1 SV=1	PF13411//PF04814//PF05920//PF00046	MerR HTH family regulatory protein//Hepatocyte nuclear factor 1 (HNF-1), N terminus//Homeobox KN domain//Homeobox domain	GO:0045893//GO:0006355	positive regulation of transcription, DNA-templated//regulation of transcription, DNA-templated	GO:0003677	DNA binding	GO:0005634	nucleus	--	--
Cluster-1007.87030	432	--	--	--	--	--	--	--	--	--	--	--	--	--	--	--	--	--	--
Cluster-1007.67509	816	--	--	LC027342.1	Haliotis diversicolor genomic DNA, BAC clone: 006_rep_c2414	--	--	--	--	--	--	--	--	--	--	--	--	--	--
Cluster-1007.67508	726	--	--	--	--	--	--	--	--	--	--	--	--	--	--	--	--	--	--
Cluster-1007.87035	3301	--	--	--	--	K09228	KRAB domain-containing zinc finger protein	A6NN14	Zinc finger protein 729 OS=Homo sapiens OX=9606 GN=ZNF729 PE=2 SV=4	PF00096//PF13465	Zinc finger, C2H2 type//Zinc-finger double domain	--	--	GO:0046872	metal ion binding	--	--	--	--
Cluster-1007.87034	352	--	--	--	--	--	--	--	--	--	--	--	--	--	--	--	--	--	--
Cluster-1007.33540	1752	--	--	KU351388.1	Haliotis discus discus metallothionein mRNA, complete cds	--	--	--	--	PF03435//PF01073//PF01370	Saccharopine dehydrogenase NADP binding domain//3-beta hydroxysteroid dehydrogenase/isomerase family//NAD dependent epimerase/dehydratase family	GO:0008209//GO:0006694//GO:0008207//GO:0008210//GO:0055114	androgen metabolic process//steroid biosynthetic process//C21-steroid hormone metabolic process//estrogen metabolic process//oxidation-reduction process	GO:0050662//GO:0016491//GO:0016616//GO:0003854//GO:0003824	coenzyme binding//oxidoreductase activity//oxidoreductase activity, acting on the CH-OH group of donors, NAD or NADP as acceptor//3-beta-hydroxy-delta5-steroid dehydrogenase activity//catalytic activity	--	--	--	--
Cluster-1007.33541	2168	--	--	--	--	--	--	--	--	--	--	--	--	--	--	--	--	--	--
Cluster-1007.33542	250	--	--	--	--	--	--	--	--	--	--	--	--	--	--	--	--	--	--
Cluster-18510.0	1169	--	--	--	--	--	--	--	--	--	--	--	--	--	--	--	--	--	--
Cluster-1007.33544	4333	--	--	XM_013089938.1	PREDICTED: Aplysia californica adenylate kinase 8-like (LOC101856479), mRNA	--	--	Q9Y6K8	Adenylate kinase isoenzyme 5 OS=Homo sapiens OX=9606 GN=AK5 PE=1 SV=2	PF03266//PF00448//PF06414//PF02224//PF14532//PF00437//PF00004//PF02609//PF00931	NTPase//SRP54-type protein, GTPase domain//Zeta toxin//Cytidylate kinase//Sigma-54 interaction domain//Type II/IV secretion system protein//ATPase family associated with various cellular activities (AAA)//Exonuclease VII small subunit//NB-ARC domain	GO:0006355//GO:0006139//GO:0006810//GO:0006614//GO:0006206//GO:0006308	regulation of transcription, DNA-templated//nucleobase-containing compound metabolic process//transport//SRP-dependent cotranslational protein targeting to membrane//pyrimidine nucleobase metabolic process//DNA catabolic process	GO:0005525//GO:0043531//GO:0008134//GO:0005524//GO:0016301//GO:0008855//GO:0004127//GO:0098519	GTP binding//ADP binding//transcription factor binding//ATP binding//kinase activity//exodeoxyribonuclease VII activity//cytidylate kinase activity//nucleotide phosphatase activity, acting on free nucleotides	GO:0005667//GO:0009318	transcription factor complex//exodeoxyribonuclease VII complex	KOG3079	Uridylate kinase/adenylate kinase
Cluster-1007.33545	282	--	--	--	--	--	--	--	--	--	--	--	--	--	--	--	--	--	--
Cluster-1007.33546	875	--	--	--	--	--	--	--	--	--	--	--	--	--	--	--	--	--	--
Cluster-1007.33547	674	--	--	--	--	--	--	--	--	--	--	--	--	--	--	--	--	--	--
Cluster-1007.33548	1051	--	--	--	--	--	--	--	--	--	--	--	--	--	--	--	--	--	--
Cluster-1007.33549	939	--	--	--	--	--	--	--	--	--	--	--	--	--	--	--	--	--	--
Cluster-4903.1	500	--	--	--	--	--	--	--	--	--	--	--	--	--	--	--	--	--	--
Cluster-36764.0	1835	--	--	--	--	--	--	--	--	--	--	--	--	--	--	--	--	--	--
Cluster-45025.0	2324	--	--	--	--	--	--	--	--	PF02323//PF01249//PF02174	Egg-laying hormone precursor//Ribosomal protein S21e//PTB domain (IRS-1 type)	GO:0006412//GO:0007275//GO:0042254//GO:0007165	translation//multicellular organismal development//ribosome biogenesis//signal transduction	GO:0003735//GO:0005158//GO:0005179	structural constituent of ribosome//insulin receptor binding//hormone activity	GO:0005899//GO:0005840//GO:0005622//GO:0005576	insulin receptor complex//ribosome//intracellular//extracellular region	--	--
Cluster-28088.0	1939	--	--	--	--	--	--	--	--	--	--	--	--	--	--	--	--	--	--
Cluster-25301.0	1482	--	--	--	--	--	--	Q709C8	Vacuolar protein sorting-associated protein 13C OS=Homo sapiens OX=9606 GN=VPS13C PE=1 SV=1	--	--	--	--	--	--	--	--	--	--
Cluster-45729.3	6897	--	--	LC027358.1	Haliotis diversicolor genomic DNA, BAC clone: 009_rep_c2377	K04681	retinoblastoma-like protein 1	Q64701	Retinoblastoma-like protein 1 OS=Mus musculus OX=10090 GN=Rbl1 PE=1 SV=3	PF01858//PF12519//PF01857	Retinoblastoma-associated protein A domain//Mitochondrial distribution and morphology protein 10//Retinoblastoma-associated protein B domain	GO:0051726//GO:0007005	regulation of cell cycle//mitochondrion organization	--	--	GO:0032865//GO:0005634	ERMES complex//nucleus	KOG1010	Rb (Retinoblastoma tumor suppressor)-related protein
Cluster-45729.2	449	--	--	LC027335.1	Haliotis diversicolor genomic DNA, BAC clone: 004_rep_c864	--	--	--	--	--	--	--	--	--	--	--	--	--	--
Cluster-45729.1	2397	--	--	LC027335.1	Haliotis diversicolor genomic DNA, BAC clone: 004_rep_c864	--	--	--	--	--	--	--	--	--	--	--	--	--	--
Cluster-4903.0	522	--	--	--	--	--	--	--	--	--	--	--	--	--	--	--	--	--	--
Cluster-45729.4	450	--	--	LC027335.1	Haliotis diversicolor genomic DNA, BAC clone: 004_rep_c864	--	--	--	--	--	--	--	--	--	--	--	--	--	--
Cluster-1007.32631	284	--	--	--	--	--	--	--	--	--	--	--	--	--	--	--	--	--	--
Cluster-1007.32630	608	--	--	EU135917.1	Haliotis midae clone 3D10 hemocyanin-like mRNA, partial sequence	--	--	--	--	--	--	--	--	--	--	--	--	--	--
Cluster-1007.32633	202	--	--	--	--	--	--	--	--	--	--	--	--	--	--	--	--	--	--
Cluster-1007.108615	1193	--	--	LC027360.1	Haliotis diversicolor genomic DNA, BAC clone: 009_rep_c2379	--	--	--	--	--	--	--	--	--	--	--	--	--	--
Cluster-1007.108612	642	--	--	--	--	--	--	--	--	--	--	--	--	--	--	--	--	--	--
Cluster-1007.108613	1559	--	--	--	--	--	--	--	--	PF01819//PF00356//PF02513	Levivirus coat protein//Bacterial regulatory proteins, lacI family//Spin/Ssty Family	GO:0007276//GO:0006355	gamete generation//regulation of transcription, DNA-templated	GO:0005198//GO:0003700	structural molecule activity//transcription factor activity, sequence-specific DNA binding	GO:0019028//GO:0005667	viral capsid//transcription factor complex	--	--
Cluster-1007.32637	1054	--	--	GQ927124.1	Haliotis midae microsatellite Hmid2015M sequence	--	--	--	--	--	--	--	--	--	--	--	--	--	--
Cluster-1007.32636	2106	--	--	LC027343.1	Haliotis diversicolor genomic DNA, BAC clone: 006_rep_c2415	--	--	--	--	PF08115	SFI toxin family	GO:0009405	pathogenesis	--	--	GO:0005576	extracellular region	--	--
Cluster-1007.32639	567	--	--	--	--	--	--	--	--	--	--	--	--	--	--	--	--	--	--
Cluster-1007.32638	1274	--	--	LC027315.1	Haliotis diversicolor genomic DNA, BAC clone: 002_c15	--	--	--	--	--	--	--	--	--	--	--	--	--	--
Cluster-29478.0	588	--	--	--	--	--	--	--	--	--	--	--	--	--	--	--	--	--	--
Cluster-1007.108618	1265	--	--	XM_002594658.1	Branchiostoma floridae hypothetical protein, mRNA	K05605	3-hydroxyisobutyryl-CoA hydrolase	Q58EB4	3-hydroxyisobutyryl-CoA hydrolase, mitochondrial OS=Danio rerio OX=7955 GN=hibch PE=2 SV=1	PF16113//PF00378//PF02376	Enoyl-CoA hydratase/isomerase//Enoyl-CoA hydratase/isomerase//CUT domain	GO:0008152	metabolic process	GO:0016836//GO:0003824//GO:0003677	hydro-lyase activity//catalytic activity//DNA binding	--	--	KOG1684	Enoyl-CoA hydratase
Cluster-1007.108619	453	--	--	--	--	K05605	3-hydroxyisobutyryl-CoA hydrolase	Q6NVY1	3-hydroxyisobutyryl-CoA hydrolase, mitochondrial OS=Homo sapiens OX=9606 GN=HIBCH PE=1 SV=2	PF16113//PF00378//PF02376	Enoyl-CoA hydratase/isomerase//Enoyl-CoA hydratase/isomerase//CUT domain	GO:0008152	metabolic process	GO:0003677//GO:0016836//GO:0003824	DNA binding//hydro-lyase activity//catalytic activity	--	--	KOG1684	Enoyl-CoA hydratase
Cluster-1007.60020	6906	--	--	--	--	K07752	carboxypeptidase D	Q90240	Carboxypeptidase D OS=Anas platyrhynchos OX=8839 GN=CPD PE=1 SV=1	PF04952//PF01066//PF00246	Succinylglutamate desuccinylase / Aspartoacylase family//CDP-alcohol phosphatidyltransferase//Zinc carboxypeptidase	GO:0006508//GO:0008152//GO:0008654	proteolysis//metabolic process//phospholipid biosynthetic process	GO:0016780//GO:0004181//GO:0008270//GO:0016788	phosphotransferase activity, for other substituted phosphate groups//metallocarboxypeptidase activity//zinc ion binding//hydrolase activity, acting on ester bonds	GO:0016020	membrane	KOG2649	Zinc carboxypeptidase
Cluster-30536.1	3250	--	--	--	--	--	--	--	--	PF10717	Occlusion-derived virus envelope protein ODV-E18	--	--	--	--	GO:0019031	viral envelope	--	--
Cluster-17448.0	538	--	--	--	--	--	--	--	--	--	--	--	--	--	--	--	--	--	--
Cluster-21109.0	531	--	--	--	--	--	--	--	--	--	--	--	--	--	--	--	--	--	--
Cluster-1007.4477	381	--	--	--	--	--	--	--	--	--	--	--	--	--	--	--	--	--	--
Cluster-1007.4476	1380	--	--	--	--	--	--	--	--	--	--	--	--	--	--	--	--	--	--
Cluster-1007.85899	243	--	--	LC027308.1	Haliotis diversicolor genomic DNA, BAC clone: 002_c8	--	--	--	--	--	--	--	--	--	--	--	--	--	--
Cluster-1007.4474	792	--	--	--	--	--	--	--	--	--	--	--	--	--	--	--	--	--	--
Cluster-1007.4473	384	--	--	HQ650238.1	Haliotis diversicolor clone Hdi59 microsatellite sequence	--	--	--	--	--	--	--	--	--	--	--	--	--	--
Cluster-1007.4472	2813	--	--	--	--	--	--	--	--	--	--	--	--	--	--	--	--	--	--
Cluster-1007.4471	652	--	--	XM_008349873.2	PREDICTED: Malus x domestica uncharacterized LOC103411226 (LOC103411226), mRNA	--	--	--	--	PF08288	PIGA (GPI anchor biosynthesis)	GO:0006506	GPI anchor biosynthetic process	--	--	--	--	--	--
Cluster-1007.4470	705	--	--	XM_017329732.1	PREDICTED: Malus x domestica uncharacterized LOC103425898 (LOC103425898), mRNA	--	--	--	--	PF08288	PIGA (GPI anchor biosynthesis)	GO:0006506	GPI anchor biosynthetic process	--	--	--	--	--	--
Cluster-1007.85893	3381	--	--	--	--	--	--	--	--	--	--	--	--	--	--	--	--	--	--
Cluster-1007.85892	3361	--	--	--	--	--	--	--	--	--	--	--	--	--	--	--	--	--	--
Cluster-1007.85891	3508	--	--	LC027332.1	Haliotis diversicolor genomic DNA, BAC clone: 004_rep_c861	--	--	Q6ZNC4	Zinc finger protein 704 OS=Homo sapiens OX=9606 GN=ZNF704 PE=1 SV=1	PF01599	Ribosomal protein S27a	GO:0006412//GO:0042254	translation//ribosome biogenesis	GO:0003735	structural constituent of ribosome	GO:0005840	ribosome	--	--
Cluster-1007.85890	1926	--	--	--	--	--	--	--	--	--	--	--	--	--	--	--	--	--	--
Cluster-1007.85897	2502	--	--	EF650053.1	Haliotis cracherodii Rab7 mRNA, partial cds	--	--	Q3T0F5	Ras-related protein Rab-7a OS=Bos taurus OX=9913 GN=RAB7A PE=2 SV=1	PF08477//PF07728//PF04670//PF00025//PF03193//PF10662//PF03266//PF01926//PF00071//PF01637//PF09048//PF00735	Ras of Complex, Roc, domain of DAPkinase//AAA domain (dynein-related subfamily)//Gtr1/RagA G protein conserved region//ADP-ribosylation factor family//Protein of unknown function, DUF258//Ethanolamine utilisation - propanediol utilisation//NTPase//50S ribosome-binding GTPase//Ras family//Archaeal ATPase//Cro//Septin	GO:0006355//GO:0006576//GO:0007264	regulation of transcription, DNA-templated//cellular biogenic amine metabolic process//small GTPase mediated signal transduction	GO:0005525//GO:0016887//GO:0005524//GO:0003924//GO:0003677//GO:0098519	GTP binding//ATPase activity//ATP binding//GTPase activity//DNA binding//nucleotide phosphatase activity, acting on free nucleotides	--	--	KOG0394	Ras-related GTPase
Cluster-1007.85896	618	--	--	--	--	--	--	--	--	--	--	--	--	--	--	--	--	--	--
Cluster-1007.4479	1572	--	--	XM_008390222.2	PREDICTED: Malus x domestica shaggy-related protein kinase alpha (LOC103450827), transcript variant X1, mRNA	K03083	glycogen synthase kinase 3 beta	P43288	Shaggy-related protein kinase alpha OS=Arabidopsis thaliana OX=3702 GN=ASK1 PE=1 SV=3	PF00069//PF07714	Protein kinase domain//Protein tyrosine kinase	GO:0006468	protein phosphorylation	GO:0004672//GO:0005524	protein kinase activity//ATP binding	--	--	--	--
Cluster-1007.4478	1581	--	--	--	--	--	--	--	--	PF05425	Copper resistance protein D	--	--	--	--	GO:0016021	integral component of membrane	--	--
Cluster-11680.0	771	--	--	--	--	--	--	--	--	--	--	--	--	--	--	--	--	--	--
Cluster-1007.64858	323	--	--	--	--	--	--	--	--	PF00335//PF01414//PF02480	Tetraspanin family//Delta serrate ligand//Alphaherpesvirus glycoprotein E	GO:0007154	cell communication	--	--	GO:0016021//GO:0016020	integral component of membrane//membrane	--	--
Cluster-1007.64859	337	--	--	--	--	--	--	--	--	--	--	--	--	--	--	--	--	--	--
Cluster-1007.64852	369	--	--	--	--	--	--	A6BM72	Multiple epidermal growth factor-like domains protein 11 OS=Homo sapiens OX=9606 GN=MEGF11 PE=2 SV=3	PF01414	Delta serrate ligand	GO:0007154	cell communication	--	--	GO:0016020	membrane	KOG1218	Proteins containing Ca2+-binding EGF-like domains
Cluster-1007.64853	536	--	--	--	--	--	--	O88281	Multiple epidermal growth factor-like domains protein 6 OS=Rattus norvegicus OX=10116 GN=Megf6 PE=1 SV=1	--	--	--	--	--	--	--	--	KOG1218	Proteins containing Ca2+-binding EGF-like domains
Cluster-1007.64850	409	--	--	--	--	--	--	Q6DIB5	Multiple epidermal growth factor-like domains protein 10 OS=Mus musculus OX=10090 GN=Megf10 PE=1 SV=1	PF01414	Delta serrate ligand	GO:0007154	cell communication	--	--	GO:0016020	membrane	--	--
Cluster-1007.83406	2313	--	--	--	--	--	--	O70511	Ankyrin-3 OS=Rattus norvegicus OX=10116 GN=Ank3 PE=1 SV=3	PF13606//PF01588//PF00023	Ankyrin repeat//Putative tRNA binding domain//Ankyrin repeat	--	--	GO:0005515//GO:0000049	protein binding//tRNA binding	--	--	KOG4177	Ankyrin
Cluster-1007.64856	567	--	--	--	--	--	--	--	--	--	--	--	--	--	--	--	--	--	--
Cluster-1007.64857	500	--	--	--	--	--	--	--	--	PF11770//PF12409//PF01414//PF02480	GRB2-binding adapter (GAPT)//P5-type ATPase cation transporter//Delta serrate ligand//Alphaherpesvirus glycoprotein E	GO:0006812//GO:0007154	cation transport//cell communication	GO:0016887	ATPase activity	GO:0016021//GO:0016020	integral component of membrane//membrane	--	--
Cluster-1007.64854	269	--	--	--	--	--	--	Q6DIB5	Multiple epidermal growth factor-like domains protein 10 OS=Mus musculus OX=10090 GN=Megf10 PE=1 SV=1	--	--	--	--	--	--	--	--	--	--
Cluster-1007.64855	518	--	--	--	--	--	--	--	--	--	--	--	--	--	--	--	--	--	--
Cluster-42486.0	3630	--	--	LC027326.1	Haliotis diversicolor genomic DNA, BAC clone: 003_rep_c698	--	--	Q8IVF4	Dynein heavy chain 10, axonemal OS=Homo sapiens OX=9606 GN=DNAH10 PE=1 SV=4	PF04120//PF14867//PF04810//PF03153	Low affinity iron permease//Lantibiotic alpha//Sec23/Sec24 zinc finger//Transcription factor IIA, alpha/beta subunit	GO:0006367//GO:0006886//GO:0055085//GO:0006888//GO:0050830	transcription initiation from RNA polymerase II promoter//intracellular protein transport//transmembrane transport//ER to Golgi vesicle-mediated transport//defense response to Gram-positive bacterium	GO:0008270	zinc ion binding	GO:0030127//GO:0005672	COPII vesicle coat//transcription factor TFIIA complex	--	--
Cluster-17140.0	562	--	--	NM_123664.4	Arabidopsis thaliana thioredoxin 3 (TRX3), mRNA	K03671	thioredoxin 1	Q42403	Thioredoxin H3 OS=Arabidopsis thaliana OX=3702 GN=TRX3 PE=1 SV=1	PF00085//PF08534//PF00578	Thioredoxin//Redoxin//AhpC/TSA family	GO:0055114//GO:0045454	oxidation-reduction process//cell redox homeostasis	GO:0016209//GO:0016491	antioxidant activity//oxidoreductase activity	--	--	--	--
Cluster-20422.0	321	--	--	--	--	--	--	--	--	--	--	--	--	--	--	--	--	--	--
Cluster-20422.1	364	--	--	--	--	--	--	--	--	--	--	--	--	--	--	--	--	--	--
Cluster-38056.0	2682	--	--	--	--	--	--	Q02357	Ankyrin-1 OS=Mus musculus OX=10090 GN=Ank1 PE=1 SV=2	PF06444//PF00799//PF00023//PF13606//PF05887	NADH dehydrogenase subunit 2 C-terminus//Geminivirus Rep catalytic domain//Ankyrin repeat//Ankyrin repeat//Procyclic acidic repetitive protein (PARP)	GO:0015992//GO:0006814//GO:0006120//GO:0006744//GO:0055114//GO:0006260	proton transport//sodium ion transport//mitochondrial electron transport, NADH to ubiquinone//ubiquinone biosynthetic process//oxidation-reduction process//DNA replication	GO:0005515//GO:0008137	protein binding//NADH dehydrogenase (ubiquinone) activity	GO:0016020	membrane	KOG4177	Ankyrin
Cluster-42507.0	1824	--	--	--	--	--	--	--	--	PF02706//PF00057//PF06994	Chain length determinant protein//Low-density lipoprotein receptor domain class A//Involucrin	GO:0009103//GO:0030216	lipopolysaccharide biosynthetic process//keratinocyte differentiation	GO:0005515	protein binding	GO:0001533//GO:0016020	cornified envelope//membrane	--	--
Cluster-11011.0	772	--	--	XM_008349886.2	PREDICTED: Malus x domestica allene oxide cyclase 4, chloroplastic-like (LOC103411240), mRNA	--	--	A2XID3	Allene oxide cyclase, chloroplastic OS=Oryza sativa subsp. indica OX=39946 GN=AOC PE=2 SV=1	PF06351	Allene oxide cyclase	--	--	GO:0016853	isomerase activity	GO:0009507	chloroplast	--	--
Cluster-1007.103198	1192	--	--	HQ650238.1	Haliotis diversicolor clone Hdi59 microsatellite sequence	--	--	--	--	--	--	--	--	--	--	--	--	--	--
Cluster-1007.103199	3960	--	--	LC027302.1	Haliotis diversicolor genomic DNA, BAC clone: 002_c2	--	--	Q09225	Nose resistant to fluoxetine protein 6 OS=Caenorhabditis elegans OX=6239 GN=nrf-6 PE=1 SV=3	PF01757	Acyltransferase family	--	--	GO:0016747	transferase activity, transferring acyl groups other than amino-acyl groups	--	--	--	--
Cluster-1007.103194	753	--	--	--	--	--	--	--	--	--	--	--	--	--	--	--	--	--	--
Cluster-1007.103195	696	--	--	--	--	--	--	--	--	--	--	--	--	--	--	--	--	--	--
Cluster-1007.103196	3112	--	--	LC027302.1	Haliotis diversicolor genomic DNA, BAC clone: 002_c2	--	--	Q09225	Nose resistant to fluoxetine protein 6 OS=Caenorhabditis elegans OX=6239 GN=nrf-6 PE=1 SV=3	PF01213//PF01757	Adenylate cyclase associated (CAP) N terminal//Acyltransferase family	GO:0007010	cytoskeleton organization	GO:0003779//GO:0016747	actin binding//transferase activity, transferring acyl groups other than amino-acyl groups	--	--	--	--
Cluster-1007.34114	2897	--	--	--	--	--	--	--	--	--	--	--	--	--	--	--	--	--	--
Cluster-1007.103190	315	--	--	--	--	--	--	--	--	--	--	--	--	--	--	--	--	--	--
Cluster-1007.103191	554	--	--	--	--	--	--	--	--	--	--	--	--	--	--	--	--	--	--
Cluster-1007.103192	523	--	--	--	--	--	--	--	--	--	--	--	--	--	--	--	--	--	--
Cluster-1007.103193	421	--	--	--	--	--	--	--	--	--	--	--	--	--	--	--	--	--	--
Cluster-36374.0	627	--	--	--	--	--	--	--	--	--	--	--	--	--	--	--	--	--	--
Cluster-39748.0	725	--	--	--	--	--	--	Q60648	Ganglioside GM2 activator OS=Mus musculus OX=10090 GN=Gm2a PE=1 SV=2	--	--	--	--	--	--	--	--	--	--
Cluster-37314.0	446	--	--	--	--	--	--	--	--	PF10410	DnaB-helicase binding domain of primase	--	--	GO:0016779	nucleotidyltransferase activity	--	--	--	--
Cluster-27949.0	1118	--	--	--	--	K01135	arylsulfatase B	P50430	Arylsulfatase B OS=Rattus norvegicus OX=10116 GN=Arsb PE=2 SV=2	PF01663//PF00884	Type I phosphodiesterase / nucleotide pyrophosphatase//Sulfatase	GO:0008152	metabolic process	GO:0008484//GO:0003824	sulfuric ester hydrolase activity//catalytic activity	--	--	KOG3867	Sulfatase
Cluster-42066.0	1194	--	--	--	--	--	--	--	--	--	--	--	--	--	--	--	--	--	--
Cluster-25130.0	582	--	--	--	--	--	--	--	--	--	--	--	--	--	--	--	--	--	--
Cluster-46592.0	1407	--	--	--	--	--	--	--	--	--	--	--	--	--	--	--	--	--	--
Cluster-3973.0	438	--	--	--	--	--	--	--	--	--	--	--	--	--	--	--	--	--	--
Cluster-1007.19778	963	--	--	--	--	--	--	--	--	--	--	--	--	--	--	--	--	--	--
Cluster-2829.0	532	--	--	--	--	--	--	--	--	--	--	--	--	--	--	--	--	--	--
Cluster-1007.104878	468	--	--	--	--	--	--	--	--	--	--	--	--	--	--	--	--	--	--
Cluster-1007.104879	507	--	--	--	--	--	--	--	--	--	--	--	--	--	--	--	--	--	--
Cluster-1007.104876	365	--	--	LC027341.1	Haliotis diversicolor genomic DNA, BAC clone: 006_rep_c2413	--	--	--	--	--	--	--	--	--	--	--	--	--	--
Cluster-1007.104877	469	--	--	--	--	--	--	--	--	PF05767	Poxvirus virion envelope protein A14	--	--	--	--	GO:0019031	viral envelope	--	--
Cluster-1007.104874	4821	--	--	LC027342.1	Haliotis diversicolor genomic DNA, BAC clone: 006_rep_c2414	--	--	--	--	PF05191//PF07503//PF13912//PF00096//PF13465	Adenylate kinase, active site lid//HypF finger//C2H2-type zinc finger//Zinc finger, C2H2 type//Zinc-finger double domain	GO:0046034//GO:0006144	ATP metabolic process//purine nucleobase metabolic process	GO:0004017//GO:0008270//GO:0046872	adenylate kinase activity//zinc ion binding//metal ion binding	--	--	--	--
Cluster-1007.104875	1281	--	--	--	--	--	--	--	--	PF02932	Neurotransmitter-gated ion-channel transmembrane region	GO:0006811	ion transport	--	--	GO:0016020	membrane	--	--
Cluster-1007.104872	614	--	--	HQ650445.1	Haliotis diversicolor clone Hdi3-168 microsatellite sequence	--	--	--	--	--	--	--	--	--	--	--	--	--	--
Cluster-1007.104873	344	--	--	LC027358.1	Haliotis diversicolor genomic DNA, BAC clone: 009_rep_c2377	--	--	--	--	--	--	--	--	--	--	--	--	--	--
Cluster-1007.104870	432	--	--	LC027297.1	Haliotis diversicolor genomic DNA, BAC clone: 001_rep_c980	--	--	--	--	--	--	--	--	--	--	--	--	--	--
Cluster-1007.104871	527	--	--	LC027297.1	Haliotis diversicolor genomic DNA, BAC clone: 001_rep_c980	--	--	--	--	--	--	--	--	--	--	--	--	--	--
Cluster-38508.0	1650	--	--	--	--	--	--	--	--	--	--	--	--	--	--	--	--	--	--
Cluster-1007.36020	502	--	--	--	--	--	--	--	--	--	--	--	--	--	--	--	--	--	--
Cluster-1007.36021	516	--	--	--	--	--	--	--	--	--	--	--	--	--	--	--	--	--	--
Cluster-1007.36022	3312	--	--	--	--	K12311	lysosomal alpha-mannosidase	O46432	Lysosomal alpha-mannosidase OS=Felis catus OX=9685 GN=MAN2B1 PE=2 SV=1	PF09261//PF07748//PF01074//PF00728	Alpha mannosidase, middle domain//Glycosyl hydrolases family 38 C-terminal domain//Glycosyl hydrolases family 38 N-terminal domain//Glycosyl hydrolase family 20, catalytic domain	GO:0006013//GO:0005975	mannose metabolic process//carbohydrate metabolic process	GO:0015923//GO:0008270//GO:0004559//GO:0004553	mannosidase activity//zinc ion binding//alpha-mannosidase activity//hydrolase activity, hydrolyzing O-glycosyl compounds	--	--	KOG1959	Glycosyl hydrolase, family 38 - alpha-mannosidase
Cluster-1007.36023	3497	--	--	--	--	--	--	O00754	Lysosomal alpha-mannosidase OS=Homo sapiens OX=9606 GN=MAN2B1 PE=1 SV=3	PF00728//PF01074//PF07748//PF09261	Glycosyl hydrolase family 20, catalytic domain//Glycosyl hydrolases family 38 N-terminal domain//Glycosyl hydrolases family 38 C-terminal domain//Alpha mannosidase, middle domain	GO:0006013//GO:0005975	mannose metabolic process//carbohydrate metabolic process	GO:0015923//GO:0008270//GO:0004559//GO:0004553	mannosidase activity//zinc ion binding//alpha-mannosidase activity//hydrolase activity, hydrolyzing O-glycosyl compounds	--	--	KOG1959	Glycosyl hydrolase, family 38 - alpha-mannosidase
Cluster-1007.36024	856	--	--	--	--	--	--	--	--	PF14972//PF01296	Mitochondrial morphogenesis regulator//Galanin	GO:0007005//GO:0007165	mitochondrion organization//signal transduction	GO:0005179	hormone activity	GO:0031305//GO:0005576	integral component of mitochondrial inner membrane//extracellular region	--	--
Cluster-1007.36025	542	--	--	--	--	K12311	lysosomal alpha-mannosidase	Q60HE9	Lysosomal alpha-mannosidase OS=Macaca fascicularis OX=9541 GN=MAN2B1 PE=2 SV=1	--	--	--	--	--	--	--	--	KOG1959	Glycosyl hydrolase, family 38 - alpha-mannosidase
Cluster-1007.36026	1594	--	--	--	--	--	--	--	--	--	--	--	--	--	--	--	--	--	--
Cluster-1007.36027	3426	--	--	--	--	K12311	lysosomal alpha-mannosidase	O46432	Lysosomal alpha-mannosidase OS=Felis catus OX=9685 GN=MAN2B1 PE=2 SV=1	PF09261//PF07748//PF01074//PF00728	Alpha mannosidase, middle domain//Glycosyl hydrolases family 38 C-terminal domain//Glycosyl hydrolases family 38 N-terminal domain//Glycosyl hydrolase family 20, catalytic domain	GO:0006013//GO:0005975	mannose metabolic process//carbohydrate metabolic process	GO:0015923//GO:0008270//GO:0004559//GO:0004553	mannosidase activity//zinc ion binding//alpha-mannosidase activity//hydrolase activity, hydrolyzing O-glycosyl compounds	--	--	KOG1959	Glycosyl hydrolase, family 38 - alpha-mannosidase
Cluster-1007.36028	3383	--	--	--	--	K12311	lysosomal alpha-mannosidase	O00754	Lysosomal alpha-mannosidase OS=Homo sapiens OX=9606 GN=MAN2B1 PE=1 SV=3	PF00728//PF07748//PF09261//PF01074	Glycosyl hydrolase family 20, catalytic domain//Glycosyl hydrolases family 38 C-terminal domain//Alpha mannosidase, middle domain//Glycosyl hydrolases family 38 N-terminal domain	GO:0005975//GO:0006013	carbohydrate metabolic process//mannose metabolic process	GO:0015923//GO:0004559//GO:0008270//GO:0004553	mannosidase activity//alpha-mannosidase activity//zinc ion binding//hydrolase activity, hydrolyzing O-glycosyl compounds	--	--	KOG1959	Glycosyl hydrolase, family 38 - alpha-mannosidase
Cluster-1007.36029	3147	--	--	XM_022481374.1	PREDICTED: Crassostrea virginica probable E3 ubiquitin-protein ligase HECTD2 (LOC111133217), mRNA	K12232	E3 ubiquitin-protein ligase HECTD2	Q5RD78	Probable E3 ubiquitin-protein ligase HECTD2 OS=Pongo abelii OX=9601 GN=HECTD2 PE=2 SV=1	PF00632//PF00158	HECT-domain (ubiquitin-transferase)//Sigma-54 interaction domain	GO:0006355//GO:0016567	regulation of transcription, DNA-templated//protein ubiquitination	GO:0008134//GO:0004842//GO:0005524	transcription factor binding//ubiquitin-protein transferase activity//ATP binding	GO:0005667	transcription factor complex	KOG0941	E3 ubiquitin protein ligase
Cluster-38489.0	2853	--	--	LC027350.1	Haliotis diversicolor genomic DNA, BAC clone: 008_rep_c1012	--	--	--	--	--	--	--	--	--	--	--	--	--	--
Cluster-1007.1157	1795	--	--	--	--	--	--	--	--	PF00910//PF02456//PF00931	RNA helicase//Adenovirus IVa2 protein//NB-ARC domain	GO:0019083	viral transcription	GO:0043531//GO:0003723//GO:0003724	ADP binding//RNA binding//RNA helicase activity	--	--	--	--
Cluster-1007.1156	2253	--	--	--	--	--	--	--	--	PF00096//PF00910//PF00931//PF02456	Zinc finger, C2H2 type//RNA helicase//NB-ARC domain//Adenovirus IVa2 protein	GO:0019083	viral transcription	GO:0046872//GO:0043531//GO:0003724//GO:0003723	metal ion binding//ADP binding//RNA helicase activity//RNA binding	--	--	--	--
Cluster-1007.1155	786	--	--	--	--	--	--	--	--	--	--	--	--	--	--	--	--	--	--
Cluster-6529.0	519	--	--	--	--	--	--	--	--	--	--	--	--	--	--	--	--	--	--
Cluster-1007.1153	2679	--	--	LC027339.1	Haliotis diversicolor genomic DNA, BAC clone: 006_rep_c2411	--	--	--	--	PF00931//PF02456//PF00096//PF00910	NB-ARC domain//Adenovirus IVa2 protein//Zinc finger, C2H2 type//RNA helicase	GO:0019083	viral transcription	GO:0003723//GO:0003724//GO:0043531//GO:0046872	RNA binding//RNA helicase activity//ADP binding//metal ion binding	--	--	--	--
Cluster-1007.1152	2295	--	--	--	--	--	--	--	--	PF00096//PF00910//PF00931//PF02456	Zinc finger, C2H2 type//RNA helicase//NB-ARC domain//Adenovirus IVa2 protein	GO:0019083	viral transcription	GO:0043531//GO:0046872//GO:0003724//GO:0003723	ADP binding//metal ion binding//RNA helicase activity//RNA binding	--	--	--	--
Cluster-1007.1151	968	--	--	--	--	--	--	--	--	--	--	--	--	--	--	--	--	--	--
Cluster-1007.1150	693	--	--	LC027332.1	Haliotis diversicolor genomic DNA, BAC clone: 004_rep_c861	--	--	--	--	--	--	--	--	--	--	--	--	--	--
Cluster-1007.24089	1142	--	--	--	--	--	--	--	--	--	--	--	--	--	--	--	--	--	--
Cluster-1007.24088	4117	--	--	LC027337.1	Haliotis diversicolor genomic DNA, BAC clone: 005_rep_c2730	--	--	O00370	LINE-1 retrotransposable element ORF2 protein OS=Homo sapiens OX=9606 PE=1 SV=1	--	--	--	--	--	--	--	--	--	--
Cluster-1007.129237	454	--	--	--	--	--	--	--	--	--	--	--	--	--	--	--	--	--	--
Cluster-1007.1159	395	--	--	--	--	--	--	--	--	--	--	--	--	--	--	--	--	--	--
Cluster-1007.1158	1320	--	--	--	--	--	--	--	--	PF00931//PF02456//PF08540//PF00910	NB-ARC domain//Adenovirus IVa2 protein//Hydroxymethylglutaryl-coenzyme A synthase C terminal//RNA helicase	GO:0046950//GO:0019083//GO:0006574//GO:0006084//GO:0006552//GO:0008299//GO:0006550	cellular ketone body metabolic process//viral transcription//valine catabolic process//acetyl-CoA metabolic process//leucine catabolic process//isoprenoid biosynthetic process//isoleucine catabolic process	GO:0004421//GO:0003723//GO:0003724//GO:0043531	hydroxymethylglutaryl-CoA synthase activity//RNA binding//RNA helicase activity//ADP binding	--	--	--	--
Cluster-1007.139634	705	--	--	EF455618.1	Haliotis midae microsatellite HmNST7T sequence	--	--	--	--	--	--	--	--	--	--	--	--	--	--
Cluster-1007.139635	1610	--	--	--	--	--	--	--	--	PF01422//PF05180	NF-X1 type zinc finger//DNL zinc finger	GO:0006355	regulation of transcription, DNA-templated	GO:0003700//GO:0008270	transcription factor activity, sequence-specific DNA binding//zinc ion binding	GO:0005667//GO:0005634	transcription factor complex//nucleus	--	--
Cluster-1007.139636	686	--	--	--	--	--	--	--	--	PF12404	Peptidase	GO:0006508	proteolysis	GO:0004177//GO:0008235//GO:0030145	aminopeptidase activity//metalloexopeptidase activity//manganese ion binding	GO:0005737	cytoplasm	--	--
Cluster-1007.139637	546	--	--	LC027336.1	Haliotis diversicolor genomic DNA, BAC clone: 005_rep_c27301	--	--	--	--	--	--	--	--	--	--	--	--	--	--
Cluster-1007.139630	507	--	--	--	--	--	--	--	--	--	--	--	--	--	--	--	--	--	--
Cluster-1007.139631	5575	--	--	--	--	--	--	Q28C74	Leucine-rich PPR motif-containing protein, mitochondrial OS=Xenopus tropicalis OX=8364 GN=lrpprc PE=2 SV=1	--	--	--	--	--	--	--	--	--	--
Cluster-1007.139632	1005	--	--	--	--	--	--	--	--	--	--	--	--	--	--	--	--	--	--
Cluster-1007.139633	248	--	--	--	--	--	--	--	--	--	--	--	--	--	--	--	--	--	--
Cluster-1007.100185	2330	--	--	LC027339.1	Haliotis diversicolor genomic DNA, BAC clone: 006_rep_c2411	--	--	Q7V9F9	30S ribosomal protein S6 OS=Prochlorococcus marinus (strain SARG / CCMP1375 / SS120) OX=167539 GN=rpsF PE=3 SV=1	--	--	--	--	--	--	--	--	--	--
Cluster-1007.139638	8901	--	--	--	--	--	--	E9Q9R9	Disks large homolog 5 OS=Mus musculus OX=10090 GN=Dlg5 PE=1 SV=1	PF04111//PF00619//PF13180//PF00595	Autophagy protein Apg6//Caspase recruitment domain//PDZ domain//PDZ domain (Also known as DHR or GLGF)	GO:0006914//GO:0042981	autophagy//regulation of apoptotic process	GO:0005515	protein binding	--	--	--	--
Cluster-1007.139639	8488	--	--	--	--	--	--	E9Q9R9	Disks large homolog 5 OS=Mus musculus OX=10090 GN=Dlg5 PE=1 SV=1	PF04111//PF10473//PF13180//PF00619//PF00595	Autophagy protein Apg6//Leucine-rich repeats of kinetochore protein Cenp-F/LEK1//PDZ domain//Caspase recruitment domain//PDZ domain (Also known as DHR or GLGF)	GO:0006914//GO:0042981	autophagy//regulation of apoptotic process	GO:0008134//GO:0045502//GO:0042803//GO:0005515	transcription factor binding//dynein binding//protein homodimerization activity//protein binding	GO:0005667//GO:0030286	transcription factor complex//dynein complex	--	--
Cluster-17446.0	1239	--	--	XM_024492550.1	Echinococcus granulosus Myosin heavy chain, striated muscle (EGR_03301), partial mRNA	K10352	myosin heavy chain	P24733	Myosin heavy chain, striated muscle OS=Argopecten irradians OX=31199 PE=1 SV=1	PF00038//PF13851//PF03567//PF08702//PF06009//PF04871//PF07926//PF01576//PF05557//PF06160	Intermediate filament protein//Growth-arrest specific micro-tubule binding//Sulfotransferase family//Fibrinogen alpha/beta chain family//Laminin Domain II//Uso1 / p115 like vesicle tethering protein, C terminal region//TPR/MLP1/MLP2-like protein//Myosin tail//Mitotic checkpoint protein//Septation ring formation regulator, EzrA	GO:0006886//GO:0015031//GO:0007165//GO:0007094//GO:0000921//GO:0030168//GO:0006606//GO:0007155//GO:0048870//GO:0051258	intracellular protein transport//protein transport//signal transduction//mitotic spindle assembly checkpoint//septin ring assembly//platelet activation//protein import into nucleus//cell adhesion//cell motility//protein polymerization	GO:0005102//GO:0003774//GO:0008146//GO:0008565//GO:0030674//GO:0005198	receptor binding//motor activity//sulfotransferase activity//protein transporter activity//protein binding, bridging//structural molecule activity	GO:0016021//GO:0031514//GO:0016459//GO:0005577//GO:0016020//GO:0005737//GO:0005882//GO:0005940	integral component of membrane//motile cilium//myosin complex//fibrinogen complex//membrane//cytoplasm//intermediate filament//septin ring	--	--
Cluster-41043.1	379	--	--	--	--	--	--	--	--	--	--	--	--	--	--	--	--	--	--
Cluster-27840.0	1557	--	--	--	--	--	--	C8YR32	Lipoxygenase homology domain-containing protein 1 OS=Mus musculus OX=10090 GN=Loxhd1 PE=2 SV=1	PF01477	PLAT/LH2 domain	--	--	GO:0005515	protein binding	--	--	--	--
Cluster-41043.2	605	--	--	--	--	--	--	--	--	--	--	--	--	--	--	--	--	--	--
Cluster-39863.0	1016	--	--	--	--	--	--	--	--	--	--	--	--	--	--	--	--	--	--
Cluster-32082.0	1352	--	--	--	--	K06238	collagen, type VI, alpha	A2AX52	Collagen alpha-4(VI) chain OS=Mus musculus OX=10090 GN=Col6a4 PE=1 SV=2	--	--	--	--	--	--	--	--	--	--
Cluster-1007.38527	306	--	--	--	--	--	--	--	--	--	--	--	--	--	--	--	--	--	--
Cluster-36102.0	907	--	--	--	--	--	--	--	--	PF06668	Inter-alpha-trypsin inhibitor heavy chain C-terminus	GO:0030212	hyaluronan metabolic process	GO:0004867	serine-type endopeptidase inhibitor activity	--	--	--	--
Cluster-1007.45672	752	--	--	--	--	--	--	--	--	--	--	--	--	--	--	--	--	--	--
Cluster-28587.0	338	--	--	--	--	--	--	Q01484	Ankyrin-2 OS=Homo sapiens OX=9606 GN=ANK2 PE=1 SV=4	PF05271//PF04265	Tobravirus 2B protein//Thiamin pyrophosphokinase, vitamin B1 binding domain	GO:0019089//GO:0009229	transmission of virus//thiamine diphosphate biosynthetic process	GO:0030975	thiamine binding	--	--	--	--
Cluster-35713.1	747	--	--	LC027342.1	Haliotis diversicolor genomic DNA, BAC clone: 006_rep_c2414	--	--	--	--	--	--	--	--	--	--	--	--	--	--
Cluster-30536.3	3230	--	--	--	--	--	--	--	--	PF10717	Occlusion-derived virus envelope protein ODV-E18	--	--	--	--	GO:0019031	viral envelope	--	--
Cluster-33341.1	652	--	--	--	--	--	--	O18739	Connective tissue growth factor OS=Bos taurus OX=9913 GN=CTGF PE=2 SV=2	PF05887//PF00093	Procyclic acidic repetitive protein (PARP)//von Willebrand factor type C domain	--	--	GO:0005515	protein binding	GO:0016020	membrane	--	--
Cluster-13313.0	385	--	--	--	--	--	--	--	--	--	--	--	--	--	--	--	--	--	--
Cluster-1007.31551	2461	--	--	LC027297.1	Haliotis diversicolor genomic DNA, BAC clone: 001_rep_c980	--	--	--	--	--	--	--	--	--	--	--	--	--	--
Cluster-1007.31550	1641	--	--	--	--	--	--	--	--	--	--	--	--	--	--	--	--	--	--
Cluster-1007.31553	2222	--	--	--	--	--	--	--	--	PF02538	Hydantoinase B/oxoprolinase	--	--	GO:0003824	catalytic activity	--	--	--	--
Cluster-1007.31552	544	--	--	--	--	--	--	--	--	--	--	--	--	--	--	--	--	--	--
Cluster-1007.31555	2354	--	--	--	--	--	--	--	--	--	--	--	--	--	--	--	--	--	--
Cluster-1007.31554	1784	--	--	--	--	--	--	--	--	--	--	--	--	--	--	--	--	--	--
Cluster-1007.31557	3938	--	--	--	--	--	--	--	--	--	--	--	--	--	--	--	--	--	--
Cluster-1007.31556	1032	--	--	LC027326.1	Haliotis diversicolor genomic DNA, BAC clone: 003_rep_c698	--	--	--	--	--	--	--	--	--	--	--	--	--	--
Cluster-1007.31559	2808	--	--	--	--	--	--	--	--	PF00096//PF16622//PF07340//PF06573	Zinc finger, C2H2 type//zinc-finger C2H2-type//Cytomegalovirus IE1 protein//Churchill protein	GO:0007275//GO:0045893//GO:0050792	multicellular organismal development//positive regulation of transcription, DNA-templated//regulation of viral process	GO:0008270//GO:0046872	zinc ion binding//metal ion binding	GO:0042025	host cell nucleus	--	--
Cluster-1007.31558	616	--	--	--	--	--	--	--	--	--	--	--	--	--	--	--	--	--	--
Cluster-45341.0	1231	--	--	--	--	--	--	--	--	PF15281	Consortin C-terminus	GO:0042998	positive regulation of Golgi to plasma membrane protein transport	GO:0071253	connexin binding	GO:0005802	trans-Golgi network	--	--
Cluster-34585.0	526	--	--	--	--	--	--	--	--	--	--	--	--	--	--	--	--	--	--
Cluster-44122.1	4376	--	--	--	--	--	--	Q149M9	NACHT domain- and WD repeat-containing protein 1 OS=Homo sapiens OX=9606 GN=NWD1 PE=1 SV=3	PF00400	WD domain, G-beta repeat	--	--	GO:0005515	protein binding	--	--	KOG3602	WD40 repeat-containing protein
Cluster-44122.0	1901	--	--	--	--	--	--	Q9ULI1	NACHT and WD repeat domain-containing protein 2 OS=Homo sapiens OX=9606 GN=NWD2 PE=2 SV=3	PF01637//PF00910//PF00102//PF00004//PF00005//PF03193	Archaeal ATPase//RNA helicase//Protein-tyrosine phosphatase//ATPase family associated with various cellular activities (AAA)//ABC transporter//Protein of unknown function, DUF258	GO:0006470//GO:0006570	protein dephosphorylation//tyrosine metabolic process	GO:0003924//GO:0003723//GO:0005525//GO:0016887//GO:0005524//GO:0004725//GO:0003724	GTPase activity//RNA binding//GTP binding//ATPase activity//ATP binding//protein tyrosine phosphatase activity//RNA helicase activity	--	--	--	--
Cluster-1007.17353	788	--	--	--	--	--	--	--	--	--	--	--	--	--	--	--	--	--	--
Cluster-1222.0	914	--	--	--	--	--	--	--	--	--	--	--	--	--	--	--	--	--	--
Cluster-26393.0	393	--	--	--	--	--	--	--	--	--	--	--	--	--	--	--	--	--	--
Cluster-24216.0	3989	--	--	--	--	--	--	O18875	Sodium- and chloride-dependent creatine transporter 1 OS=Bos taurus OX=9913 GN=SLC6A8 PE=2 SV=1	PF00209	Sodium:neurotransmitter symporter family	GO:0006836//GO:0006812	neurotransmitter transport//cation transport	GO:0005328	neurotransmitter:sodium symporter activity	GO:0016021	integral component of membrane	--	--
Cluster-42429.9	1415	--	--	--	--	--	--	O75197	Low-density lipoprotein receptor-related protein 5 OS=Homo sapiens OX=9606 GN=LRP5 PE=1 SV=2	--	--	--	--	--	--	--	--	--	--
Cluster-42429.8	1201	--	--	--	--	--	--	O75197	Low-density lipoprotein receptor-related protein 5 OS=Homo sapiens OX=9606 GN=LRP5 PE=1 SV=2	--	--	--	--	--	--	--	--	--	--
Cluster-15929.0	821	--	--	--	--	--	--	--	--	--	--	--	--	--	--	--	--	--	--
Cluster-42429.1	1382	--	--	--	--	--	--	--	--	--	--	--	--	--	--	--	--	--	--
Cluster-42429.0	498	--	--	--	--	--	--	--	--	--	--	--	--	--	--	--	--	--	--
Cluster-42429.3	2402	--	--	--	--	--	--	Q9NZR2	Low-density lipoprotein receptor-related protein 1B OS=Homo sapiens OX=9606 GN=LRP1B PE=1 SV=2	--	--	--	--	--	--	--	--	--	--
Cluster-42429.2	1320	--	--	--	--	--	--	--	--	--	--	--	--	--	--	--	--	--	--
Cluster-42429.5	3399	--	--	--	--	--	--	Q9NZR2	Low-density lipoprotein receptor-related protein 1B OS=Homo sapiens OX=9606 GN=LRP1B PE=1 SV=2	--	--	--	--	--	--	--	--	KOG1215	Low-density lipoprotein receptors containing Ca2+-binding EGF-like domains
Cluster-42429.4	2991	--	--	--	--	--	--	O75197	Low-density lipoprotein receptor-related protein 5 OS=Homo sapiens OX=9606 GN=LRP5 PE=1 SV=2	--	--	--	--	--	--	--	--	--	--
Cluster-42429.7	933	--	--	--	--	--	--	--	--	PF07648	Kazal-type serine protease inhibitor domain	--	--	GO:0005515	protein binding	--	--	--	--
Cluster-42429.6	974	--	--	--	--	--	--	--	--	PF02358	Trehalose-phosphatase	GO:0005992	trehalose biosynthetic process	GO:0003824	catalytic activity	--	--	--	--
Cluster-1007.58738	379	--	--	--	--	--	--	--	--	--	--	--	--	--	--	--	--	--	--
Cluster-1007.58739	377	--	--	--	--	--	--	--	--	PF02673	Bacitracin resistance protein BacA	GO:0009252//GO:0016311	peptidoglycan biosynthetic process//dephosphorylation	GO:0050380	undecaprenyl-diphosphatase activity	GO:0016020	membrane	--	--
Cluster-42901.0	689	--	--	--	--	--	--	--	--	--	--	--	--	--	--	--	--	--	--
Cluster-31050.0	721	--	--	--	--	--	--	--	--	--	--	--	--	--	--	--	--	--	--
Cluster-1007.58730	1083	--	--	LC027302.1	Haliotis diversicolor genomic DNA, BAC clone: 002_c2	--	--	--	--	PF17123	RING-like zinc finger	--	--	GO:0005515//GO:0008270	protein binding//zinc ion binding	--	--	--	--
Cluster-1007.58731	7564	--	--	XM_002592928.1	Branchiostoma floridae hypothetical protein, mRNA	K11718	UDP-glucose:glycoprotein glucosyltransferase	Q9JLA3	UDP-glucose:glycoprotein glucosyltransferase 1 OS=Rattus norvegicus OX=10116 GN=Uggt1 PE=1 SV=2	PF06427//PF01501	UDP-glucose:Glycoprotein Glucosyltransferase//Glycosyl transferase family 8	GO:0006486	protein glycosylation	GO:0003980//GO:0016757	UDP-glucose:glycoprotein glucosyltransferase activity//transferase activity, transferring glycosyl groups	--	--	KOG1879	UDP-glucose:glycoprotein glucosyltransferase
Cluster-1007.58732	260	--	--	LC027340.1	Haliotis diversicolor genomic DNA, BAC clone: 006_rep_c2412	--	--	--	--	--	--	--	--	--	--	--	--	--	--
Cluster-1007.58733	1049	--	--	--	--	--	--	--	--	--	--	--	--	--	--	--	--	--	--
Cluster-1007.58734	250	--	--	--	--	--	--	--	--	--	--	--	--	--	--	--	--	--	--
Cluster-1007.58735	366	--	--	LC027297.1	Haliotis diversicolor genomic DNA, BAC clone: 001_rep_c980	--	--	--	--	--	--	--	--	--	--	--	--	--	--
Cluster-1007.58736	223	--	--	--	--	--	--	--	--	--	--	--	--	--	--	--	--	--	--
Cluster-1007.58737	222	--	--	--	--	--	--	--	--	--	--	--	--	--	--	--	--	--	--
Cluster-1007.64069	547	--	--	--	--	--	--	--	--	--	--	--	--	--	--	--	--	--	--
Cluster-1007.64068	1544	--	--	--	--	K02906	large subunit ribosomal protein L3	Q99N95	39S ribosomal protein L3, mitochondrial OS=Mus musculus OX=10090 GN=Mrpl3 PE=1 SV=1	PF00297	Ribosomal protein L3	GO:0006412//GO:0042254	translation//ribosome biogenesis	GO:0003735	structural constituent of ribosome	GO:0005840//GO:0005622	ribosome//intracellular	KOG3141	Mitochondrial/chloroplast ribosomal protein L3
Cluster-40813.0	758	--	--	--	--	--	--	--	--	--	--	--	--	--	--	--	--	--	--
Cluster-1007.64063	2423	--	--	LC027358.1	Haliotis diversicolor genomic DNA, BAC clone: 009_rep_c2377	--	--	--	--	--	--	--	--	--	--	--	--	--	--
Cluster-1007.64062	571	--	--	LC027358.1	Haliotis diversicolor genomic DNA, BAC clone: 009_rep_c2377	--	--	--	--	--	--	--	--	--	--	--	--	--	--
Cluster-1007.64061	1295	--	--	--	--	--	--	--	--	PF05399	Ectropic viral integration site 2A protein (EVI2A)	--	--	--	--	GO:0016021	integral component of membrane	--	--
Cluster-1007.64060	1502	--	--	--	--	--	--	Q9I926	Fucolectin-6 OS=Anguilla japonica OX=7937 PE=2 SV=1	--	--	--	--	--	--	--	--	--	--
Cluster-1007.64067	629	--	--	--	--	--	--	--	--	PF07701	Heme NO binding associated	GO:0046039//GO:0006182//GO:0006144	GTP metabolic process//cGMP biosynthetic process//purine nucleobase metabolic process	GO:0004383	guanylate cyclase activity	--	--	--	--
Cluster-1007.64066	335	--	--	--	--	--	--	--	--	PF02560//PF08653	Cyanate lyase C-terminal domain//DASH complex subunit Dam1	GO:0008608//GO:0009439	attachment of spindle microtubules to kinetochore//cyanate metabolic process	--	--	GO:0042729//GO:0072686	DASH complex//mitotic spindle	--	--
Cluster-1007.64065	2184	--	--	--	--	--	--	--	--	--	--	--	--	--	--	--	--	--	--
Cluster-1007.64064	733	--	--	LC027358.1	Haliotis diversicolor genomic DNA, BAC clone: 009_rep_c2377	--	--	--	--	--	--	--	--	--	--	--	--	--	--
Cluster-11709.0	494	--	--	--	--	--	--	--	--	--	--	--	--	--	--	--	--	--	--
Cluster-17075.0	468	--	--	--	--	--	--	--	--	--	--	--	--	--	--	--	--	--	--
Cluster-1007.54594	2346	--	--	--	--	--	--	--	--	PF08088	Conotoxin I-superfamily	GO:0009405	pathogenesis	--	--	GO:0005576	extracellular region	--	--
Cluster-1007.54595	2539	--	--	--	--	--	--	--	--	PF08088	Conotoxin I-superfamily	GO:0009405	pathogenesis	--	--	GO:0005576	extracellular region	--	--
Cluster-1007.12244	413	--	--	--	--	--	--	--	--	--	--	--	--	--	--	--	--	--	--
Cluster-1007.111382	887	--	--	NM_001328785.1	Malus domestica thaumatin-like protein 1a (LOC103411735), mRNA >gi|10334650|emb|AJ243427.1| Malus domestica mRNA for thaumatin-like protein (tl gene)	--	--	Q9FSG7	Thaumatin-like protein 1a OS=Malus domestica OX=3750 GN=TL1 PE=1 SV=1	PF06525	Sulfocyanin (SoxE) domain	GO:0055114	oxidation-reduction process	GO:0005507	copper ion binding	--	--	--	--
Cluster-1007.111383	588	--	--	--	--	--	--	--	--	--	--	--	--	--	--	--	--	--	--
Cluster-1007.111380	984	--	--	--	--	--	--	A8MTT3	Protein CEBPZOS OS=Homo sapiens OX=9606 GN=CEBPZOS PE=1 SV=2	--	--	--	--	--	--	--	--	--	--
Cluster-1007.111381	1000	--	--	--	--	--	--	A8MTT3	Protein CEBPZOS OS=Homo sapiens OX=9606 GN=CEBPZOS PE=1 SV=2	--	--	--	--	--	--	--	--	--	--
Cluster-1007.111386	934	--	--	--	--	--	--	--	--	--	--	--	--	--	--	--	--	--	--
Cluster-1007.111387	1277	--	--	KU351251.1	Haliotis discus discus proteosome PSMB6/9 (ppsmb6/9) mRNA, complete cds	K02738	20S proteasome subunit beta 1	P28072	Proteasome subunit beta type-6 OS=Homo sapiens OX=9606 GN=PSMB6 PE=1 SV=4	--	--	--	--	--	--	--	--	--	--
Cluster-1007.111384	464	--	--	LC027297.1	Haliotis diversicolor genomic DNA, BAC clone: 001_rep_c980	--	--	--	--	--	--	--	--	--	--	--	--	--	--
Cluster-1007.111385	5612	--	--	--	--	--	--	A1A5G0	CLIP-associating protein 1 OS=Xenopus tropicalis OX=8364 GN=clasp1 PE=1 SV=1	--	--	--	--	--	--	--	--	--	--
Cluster-1007.12242	1463	--	--	--	--	--	--	--	--	--	--	--	--	--	--	--	--	--	--
Cluster-1007.111388	691	--	--	--	--	--	--	--	--	--	--	--	--	--	--	--	--	--	--
Cluster-1007.111389	264	--	--	--	--	--	--	--	--	--	--	--	--	--	--	--	--	--	--
Cluster-1007.138132	637	--	--	--	--	--	--	--	--	--	--	--	--	--	--	--	--	--	--
Cluster-1007.12243	1589	--	--	--	--	--	--	--	--	--	--	--	--	--	--	--	--	--	--
Cluster-1007.148414	3622	--	--	AF327746.1	Haliotis asinina homeobox protein (Hox1) mRNA, partial cds	K09301	homeobox protein HoxA/B/D1	P17919	Homeobox protein Hox-B1 OS=Mus musculus OX=10090 GN=Hoxb1 PE=2 SV=1	PF05920//PF00046	Homeobox KN domain//Homeobox domain	GO:0006355	regulation of transcription, DNA-templated	GO:0003677	DNA binding	--	--	KOG0489	Transcription factor zerknullt and related HOX domain proteins
Cluster-1007.138133	901	--	--	LC027336.1	Haliotis diversicolor genomic DNA, BAC clone: 005_rep_c27301	--	--	--	--	--	--	--	--	--	--	--	--	--	--
Cluster-1007.54592	1231	--	--	--	--	--	--	--	--	--	--	--	--	--	--	--	--	--	--
Cluster-1007.107758	1026	--	--	--	--	--	--	--	--	--	--	--	--	--	--	--	--	--	--
Cluster-1007.107759	771	--	--	--	--	--	--	--	--	--	--	--	--	--	--	--	--	--	--
Cluster-1007.107756	1099	--	--	GU995900.1	Haliotis discus hannai microsatellite CHh146 sequence	--	--	--	--	--	--	--	--	--	--	--	--	--	--
Cluster-1007.107757	720	--	--	--	--	--	--	--	--	--	--	--	--	--	--	--	--	--	--
Cluster-1007.107754	1075	--	--	GU995900.1	Haliotis discus hannai microsatellite CHh146 sequence	--	--	--	--	--	--	--	--	--	--	--	--	--	--
Cluster-1007.12241	7873	--	--	--	--	--	--	--	--	PF02532//PF12300//PF01080	Photosystem II reaction centre I protein (PSII 4.8 kDa protein)//Protein of unknown function (DUF3628)//Presenilin	GO:0015979	photosynthesis	GO:0016817//GO:0004190	hydrolase activity, acting on acid anhydrides//aspartic-type endopeptidase activity	GO:0009539//GO:0009523//GO:0016021//GO:0016020	photosystem II reaction center//photosystem II//integral component of membrane//membrane	--	--
Cluster-1007.107752	1055	--	--	LC027305.1	Haliotis diversicolor genomic DNA, BAC clone: 002_c5	--	--	--	--	--	--	--	--	--	--	--	--	--	--
Cluster-1007.148416	2454	--	--	--	--	--	--	--	--	--	--	--	--	--	--	--	--	--	--
Cluster-1007.107750	584	--	--	--	--	--	--	--	--	--	--	--	--	--	--	--	--	--	--
Cluster-1007.107751	496	--	--	--	--	--	--	--	--	--	--	--	--	--	--	--	--	--	--
Cluster-22390.0	855	--	--	GU995566.1	Haliotis discus hannai clone CH1698 microsatellite sequence	--	--	--	--	--	--	--	--	--	--	--	--	--	--
Cluster-6536.0	1840	--	--	XM_008363309.2	PREDICTED: Malus x domestica bifunctional aspartokinase/homoserine dehydrogenase 1, chloroplastic-like (LOC103425227), transcript variant X2, mRNA	--	--	Q9SA18	Bifunctional aspartokinase/homoserine dehydrogenase 1, chloroplastic OS=Arabidopsis thaliana OX=3702 GN=AKHSDH1 PE=1 SV=1	PF00742//PF03447//PF01842	Homoserine dehydrogenase//Homoserine dehydrogenase, NAD binding domain//ACT domain	GO:0055114//GO:0008152//GO:0006520	oxidation-reduction process//metabolic process//cellular amino acid metabolic process	GO:0016597//GO:0016491//GO:0050661	amino acid binding//oxidoreductase activity//NADP binding	--	--	KOG0456	Aspartate kinase
Cluster-1007.138136	1143	--	--	--	--	--	--	--	--	PF00620	RhoGAP domain	GO:0007165	signal transduction	--	--	--	--	--	--
Cluster-11668.0	328	--	--	--	--	--	--	--	--	--	--	--	--	--	--	--	--	--	--
Cluster-1007.138137	1105	--	--	LC027294.1	Haliotis diversicolor genomic DNA, BAC clone: 001_rep_c977	--	--	A0A1B0GTI8	Transmembrane protein 272 OS=Homo sapiens OX=9606 GN=TMEM272 PE=2 SV=2	PF00536	SAM domain (Sterile alpha motif)	--	--	GO:0005515	protein binding	--	--	--	--
Cluster-27694.0	1103	--	--	LC027336.1	Haliotis diversicolor genomic DNA, BAC clone: 005_rep_c27301	--	--	--	--	--	--	--	--	--	--	--	--	--	--
Cluster-38362.0	624	--	--	--	--	--	--	D3ZQG6	Tripartite motif-containing protein 2 OS=Rattus norvegicus OX=10116 GN=Trim2 PE=1 SV=2	PF01436	NHL repeat	--	--	GO:0005515	protein binding	--	--	--	--
Cluster-44967.0	702	--	--	--	--	--	--	--	--	--	--	--	--	--	--	--	--	--	--
Cluster-1007.106809	1572	--	--	--	--	--	--	--	--	PF11857	Domain of unknown function (DUF3377)	--	--	GO:0004222	metalloendopeptidase activity	--	--	--	--
Cluster-1007.106808	593	--	--	--	--	--	--	--	--	--	--	--	--	--	--	--	--	--	--
Cluster-1007.106805	2595	--	--	--	--	--	--	--	--	PF13851//PF04546	Growth-arrest specific micro-tubule binding//Sigma-70, non-essential region	GO:0006352//GO:0048870//GO:0006355	DNA-templated transcription, initiation//cell motility//regulation of transcription, DNA-templated	GO:0003677//GO:0016987//GO:0003700	DNA binding//sigma factor activity//transcription factor activity, sequence-specific DNA binding	GO:0005667//GO:0031514	transcription factor complex//motile cilium	--	--
Cluster-1007.106804	2049	--	--	GU995882.1	Haliotis discus hannai microsatellite CHh109 sequence	--	--	Q80V70	Multiple epidermal growth factor-like domains protein 6 OS=Mus musculus OX=10090 GN=Megf6 PE=2 SV=3	PF11057	Cortexin of kidney	--	--	--	--	GO:0031224	intrinsic component of membrane	--	--
Cluster-1007.106807	2059	--	--	GU995951.1	Haliotis discus hannai clone CHh056 microsatellite sequence	--	--	--	--	--	--	--	--	--	--	--	--	--	--
Cluster-1007.106806	374	--	--	--	--	--	--	--	--	--	--	--	--	--	--	--	--	--	--
Cluster-1007.106801	660	--	--	--	--	--	--	--	--	--	--	--	--	--	--	--	--	--	--
Cluster-1007.106800	255	--	--	--	--	--	--	--	--	--	--	--	--	--	--	--	--	--	--
Cluster-1007.106803	453	--	--	--	--	--	--	--	--	--	--	--	--	--	--	--	--	--	--
Cluster-1007.106802	591	--	--	--	--	--	--	--	--	--	--	--	--	--	--	--	--	--	--
Cluster-39171.0	1678	--	--	--	--	--	--	Q6NZK8	Protein tyrosine phosphatase domain-containing protein 1 OS=Mus musculus OX=10090 GN=Ptpdc1 PE=1 SV=1	PF09126//PF05706//PF01239//PF13413//PF00782//PF00102	Restriction endonuclease NaeI//Cyclin-dependent kinase inhibitor 3 (CDKN3)//Protein prenyltransferase alpha subunit repeat//Helix-turn-helix domain//Dual specificity phosphatase, catalytic domain//Protein-tyrosine phosphatase	GO:0006308//GO:0018342//GO:0006470//GO:0009307//GO:0006570	DNA catabolic process//protein prenylation//protein dephosphorylation//DNA restriction-modification system//tyrosine metabolic process	GO:0008138//GO:0008318//GO:0003677//GO:0004721//GO:0009036//GO:0004725	protein tyrosine/serine/threonine phosphatase activity//protein prenyltransferase activity//DNA binding//phosphoprotein phosphatase activity//Type II site-specific deoxyribonuclease activity//protein tyrosine phosphatase activity	GO:0009359	Type II site-specific deoxyribonuclease complex	KOG1720	Protein tyrosine phosphatase CDC14
Cluster-1007.13948	3524	--	--	--	--	--	--	--	--	PF16622//PF00283//PF00229	zinc-finger C2H2-type//Cytochrome b559, alpha (gene psbE) and beta (gene psbF)subunits//TNF(Tumour Necrosis Factor) family	GO:0007165//GO:0015979//GO:0006955	signal transduction//photosynthesis//immune response	GO:0046872//GO:0005164	metal ion binding//tumor necrosis factor receptor binding	GO:0016020	membrane	--	--
Cluster-1007.13949	3434	--	--	--	--	--	--	--	--	PF00229//PF16622//PF00283	TNF(Tumour Necrosis Factor) family//zinc-finger C2H2-type//Cytochrome b559, alpha (gene psbE) and beta (gene psbF)subunits	GO:0007165//GO:0015979//GO:0006955	signal transduction//photosynthesis//immune response	GO:0046872//GO:0005164	metal ion binding//tumor necrosis factor receptor binding	GO:0016020	membrane	--	--
Cluster-4720.0	1280	--	--	XM_017330697.1	PREDICTED: Malus x domestica multiple organellar RNA editing factor 8, chloroplastic/mitochondrial-like (LOC103429486), mRNA	--	--	Q9LKA5	Multiple organellar RNA editing factor 8, chloroplastic/mitochondrial OS=Arabidopsis thaliana OX=3702 GN=MORF8 PE=1 SV=1	--	--	--	--	--	--	--	--	--	--
Cluster-1007.13942	3566	--	--	--	--	--	--	--	--	PF00283//PF00229	Cytochrome b559, alpha (gene psbE) and beta (gene psbF)subunits//TNF(Tumour Necrosis Factor) family	GO:0006955//GO:0007165//GO:0015979	immune response//signal transduction//photosynthesis	GO:0005164	tumor necrosis factor receptor binding	GO:0016020	membrane	--	--
Cluster-1007.13943	226	--	--	--	--	--	--	--	--	--	--	--	--	--	--	--	--	--	--
Cluster-1007.13940	253	--	--	--	--	--	--	--	--	PF08603//PF03172//PF00730	Adenylate cyclase associated (CAP) C terminal//Sp100 domain//HhH-GPD superfamily base excision DNA repair protein	GO:0006284//GO:0007010	base-excision repair//cytoskeleton organization	GO:0003779	actin binding	GO:0005634	nucleus	--	--
Cluster-1007.13941	2278	--	--	--	--	--	--	--	--	--	--	--	--	--	--	--	--	--	--
Cluster-1007.13946	3962	--	--	--	--	--	--	--	--	PF15216//PF00229//PF02805//PF16622//PF00283	Thymic stromal lymphopoietin//TNF(Tumour Necrosis Factor) family//Metal binding domain of Ada//zinc-finger C2H2-type//Cytochrome b559, alpha (gene psbE) and beta (gene psbF)subunits	GO:0007165//GO:0006355//GO:0015979//GO:0006281//GO:0006955	signal transduction//regulation of transcription, DNA-templated//photosynthesis//DNA repair//immune response	GO:0005164//GO:0008168//GO:0003677//GO:0046872//GO:0005125//GO:0008270	tumor necrosis factor receptor binding//methyltransferase activity//DNA binding//metal ion binding//cytokine activity//zinc ion binding	GO:0016020	membrane	--	--
Cluster-1007.13947	3476	--	--	--	--	--	--	--	--	PF00283//PF00229	Cytochrome b559, alpha (gene psbE) and beta (gene psbF)subunits//TNF(Tumour Necrosis Factor) family	GO:0006955//GO:0015979//GO:0007165	immune response//photosynthesis//signal transduction	GO:0005164	tumor necrosis factor receptor binding	GO:0016020	membrane	--	--
Cluster-1007.13944	609	--	--	--	--	--	--	--	--	--	--	--	--	--	--	--	--	--	--
Cluster-1007.148419	1291	--	--	--	--	--	--	--	--	--	--	--	--	--	--	--	--	--	--
Cluster-1007.67647	2838	--	--	LC027332.1	Haliotis diversicolor genomic DNA, BAC clone: 004_rep_c861	--	--	--	--	--	--	--	--	--	--	--	--	--	--
Cluster-8817.0	1215	--	--	GU995898.1	Haliotis discus hannai microsatellite CHh141 sequence	--	--	--	--	PF15281	Consortin C-terminus	GO:0042998	positive regulation of Golgi to plasma membrane protein transport	GO:0071253	connexin binding	GO:0005802	trans-Golgi network	--	--
Cluster-19935.0	515	--	--	--	--	--	--	--	--	--	--	--	--	--	--	--	--	--	--
Cluster-36979.0	1724	--	--	--	--	--	--	--	--	--	--	--	--	--	--	--	--	--	--
Cluster-30319.0	1053	--	--	--	--	--	--	--	--	--	--	--	--	--	--	--	--	--	--
Cluster-33375.1	2645	--	--	LC027336.1	Haliotis diversicolor genomic DNA, BAC clone: 005_rep_c27301	K12305	ectonucleoside triphosphate diphosphohydrolase 4	Q9Y227	Ectonucleoside triphosphate diphosphohydrolase 4 OS=Homo sapiens OX=9606 GN=ENTPD4 PE=1 SV=1	PF01150	GDA1/CD39 (nucleoside phosphatase) family	--	--	GO:0016787	hydrolase activity	--	--	KOG1386	Nucleoside phosphatase
Cluster-33375.0	1397	--	--	--	--	K08497	protein transport protein SEC20	Q6QD59	Vesicle transport protein SEC20 OS=Mus musculus OX=10090 GN=Bnip1 PE=1 SV=1	PF05615//PF11744	Tho complex subunit 7//Aluminium activated malate transporter	GO:0015743//GO:0006397	malate transport//mRNA processing	--	--	GO:0000445	THO complex part of transcription export complex	--	--
Cluster-45669.0	839	--	--	--	--	--	--	--	--	--	--	--	--	--	--	--	--	--	--
Cluster-1007.67645	2224	--	--	JF693973.1	Haliotis sieboldii microsatellite A38 sequence	--	--	--	--	PF02983//PF00641//PF06580	Alpha-lytic protease prodomain//Zn-finger in Ran binding protein and others//Histidine kinase	GO:0000160//GO:0006508//GO:0016310	phosphorelay signal transduction system//proteolysis//phosphorylation	GO:0000155//GO:0008236//GO:0008270	phosphorelay sensor kinase activity//serine-type peptidase activity//zinc ion binding	GO:0005576//GO:0009365//GO:0016021	extracellular region//protein histidine kinase complex//integral component of membrane	--	--
Cluster-14668.0	574	--	--	--	--	--	--	--	--	--	--	--	--	--	--	--	--	--	--
Cluster-1007.107587	410	--	--	--	--	--	--	--	--	--	--	--	--	--	--	--	--	--	--
Cluster-1007.106449	474	--	--	LC027359.1	Haliotis diversicolor genomic DNA, BAC clone: 009_rep_c2378	--	--	--	--	--	--	--	--	--	--	--	--	--	--
Cluster-1007.107586	667	--	--	--	--	--	--	--	--	--	--	--	--	--	--	--	--	--	--
Cluster-8757.0	699	--	--	XM_008372451.2	PREDICTED: Malus x domestica mediator-associated protein 1-like (LOC103434143), mRNA	--	--	F4K5T4	Probable transcription factor At5g28040 OS=Arabidopsis thaliana OX=3702 GN=At5g28040 PE=1 SV=1	--	--	--	--	--	--	--	--	--	--
Cluster-29437.0	2267	--	--	--	--	K15502	serine/threonine-protein phosphatase 6 regulatory ankyrin repeat subunit A	Q01484	Ankyrin-2 OS=Homo sapiens OX=9606 GN=ANK2 PE=1 SV=4	PF13606//PF07525//PF10660//PF00023	Ankyrin repeat//SOCS box//Iron-containing outer mitochondrial membrane protein N-terminus//Ankyrin repeat	GO:0035556	intracellular signal transduction	GO:0005515//GO:0051537	protein binding//2 iron, 2 sulfur cluster binding	GO:0043231	intracellular membrane-bounded organelle	--	--
Cluster-1007.48175	956	--	--	--	--	--	--	--	--	--	--	--	--	--	--	--	--	--	--
Cluster-1007.48174	838	--	--	LC027297.1	Haliotis diversicolor genomic DNA, BAC clone: 001_rep_c980	--	--	--	--	--	--	--	--	--	--	--	--	--	--
Cluster-1007.107583	1505	--	--	D83984.1	Haliotis diversicolor gene for IDO-like myoglobin, complete cds	--	--	--	--	PF05439//PF01667	Jumping translocation breakpoint protein (JTB)//Ribosomal protein S27	GO:0006412//GO:0042254	translation//ribosome biogenesis	GO:0003735	structural constituent of ribosome	GO:0005840//GO:0005622//GO:0016021	ribosome//intracellular//integral component of membrane	--	--
Cluster-30896.0	1700	--	--	--	--	--	--	A0JM12	Multiple epidermal growth factor-like domains protein 10 OS=Xenopus tropicalis OX=8364 GN=megf10 PE=2 SV=1	--	--	--	--	--	--	--	--	KOG1836	Extracellular matrix glycoprotein Laminin subunits alpha and gamma
Cluster-1007.107582	904	--	--	--	--	--	--	--	--	--	--	--	--	--	--	--	--	--	--
Cluster-29109.0	381	--	--	--	--	--	--	--	--	--	--	--	--	--	--	--	--	--	--
[truncated: 142,110 more rows]

## Sheet: Table S3
Table S3. GO annotation of the Haliotis diversicolor supertexta transcriptome.
GO ID (Lev1)	GO Term (Lev1)	GO ID (Lev2)	GO Term (Lev2)	GO ID (Lev3)	GO Term (Lev3)	GO ID (Lev4)	GO Term (Lev4)	Gene Number
GO:0005575	Cellular Component	GO:0031974	membrane-enclosed lumen	GO:0043233	organelle lumen	GO:0031983	vesicle lumen	1
[truncated: 2,044 more rows]

## Sheet: Table S4
Table S4. KEGG annotation of the Haliotis diversicolor supertexta transcriptome.
[truncated: 233 more rows]

[truncated: 5 more sheets: Table S5, Table S6, Table S7, Table S8, Table S9]
