# Supplementary figures and images for: Dual Transcriptomic Analysis Reveals a Delayed Antiviral Response of Haliotis diversicolor supertexta against Haliotid Herpesvirus-1
Source: MDPI journal article supplement (doi:10.3390/v11040383), 2019-04-24

Figure S1. Validation of transcriptomic differentially expressed genes (DEGs) by qRT-PCR.

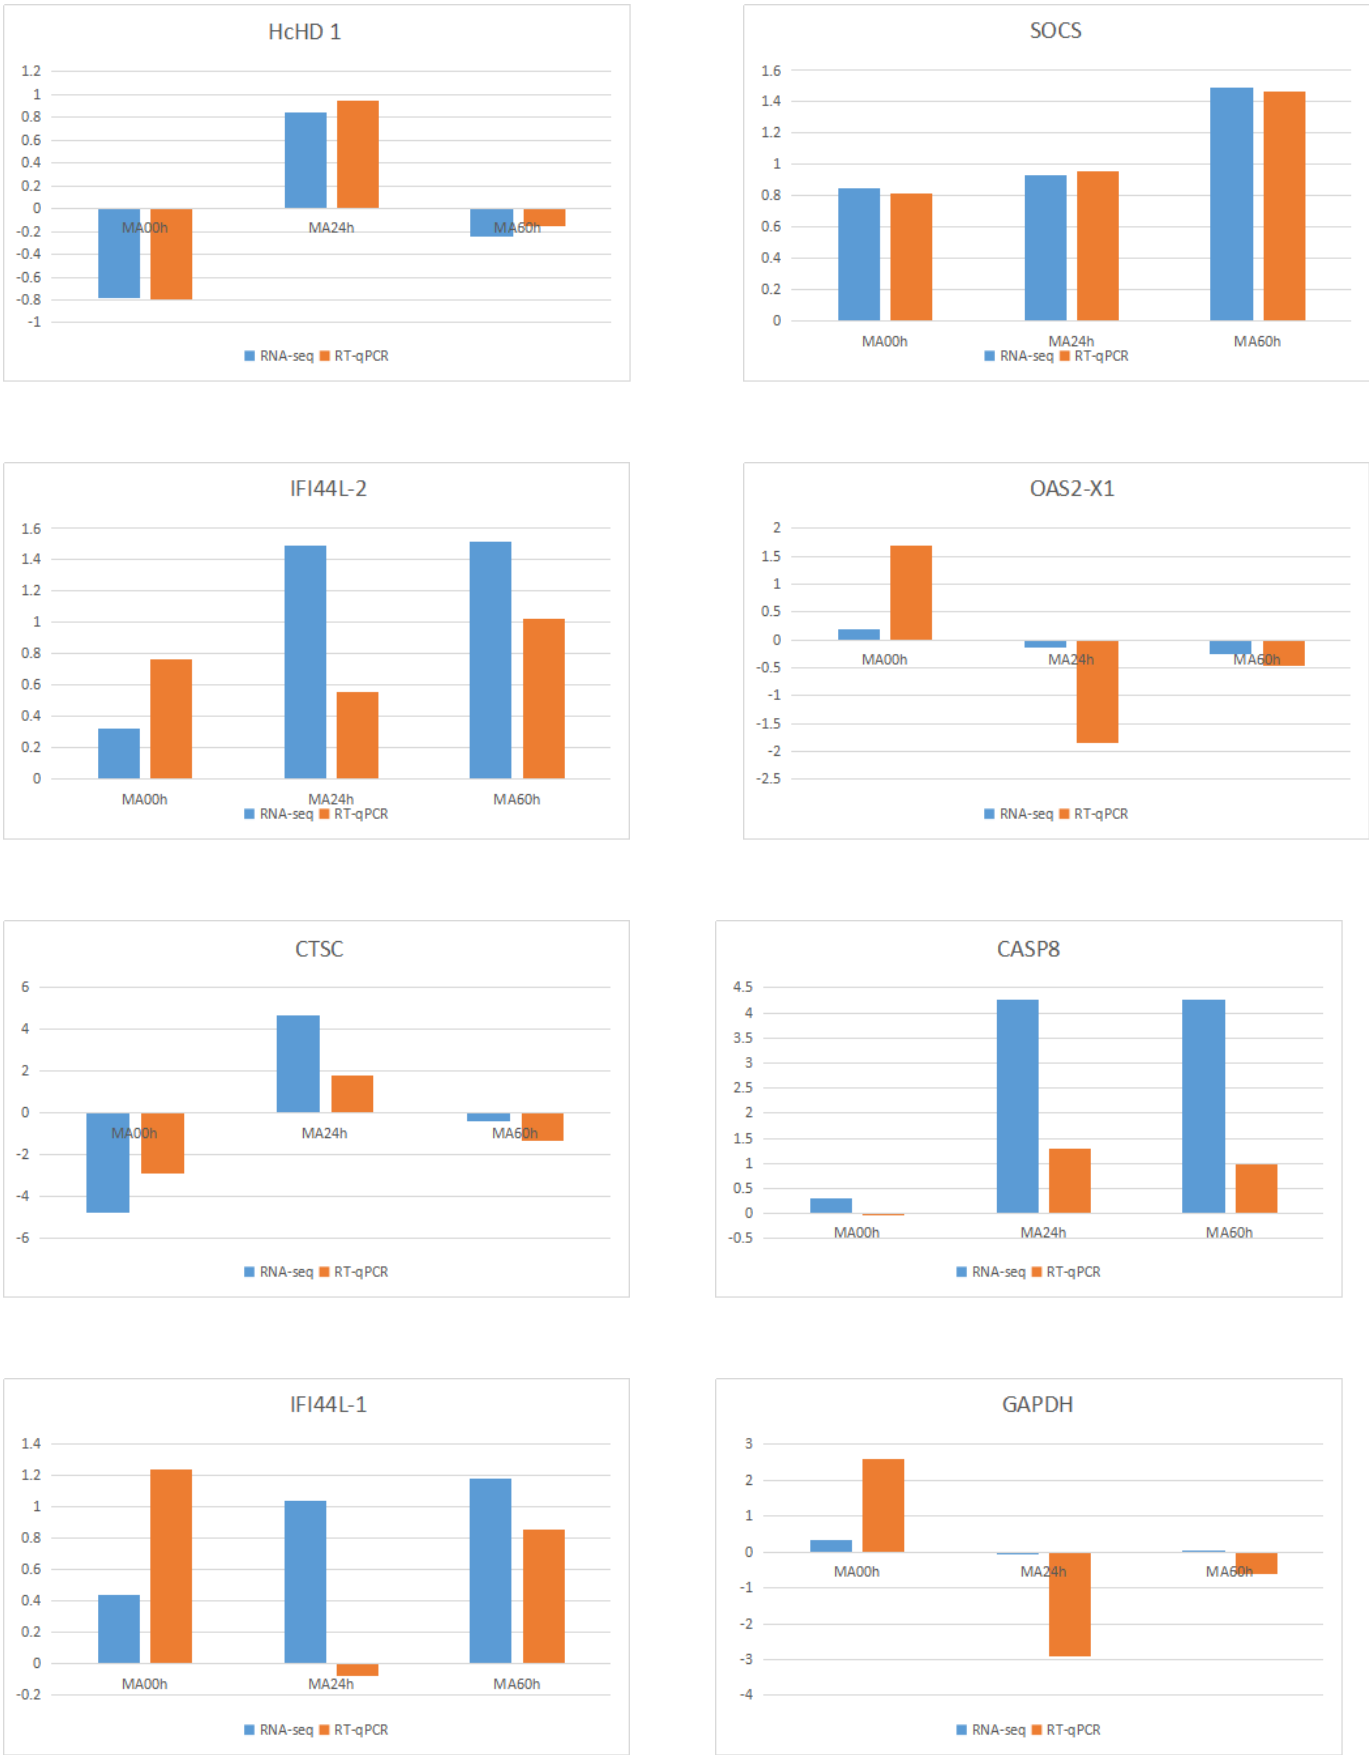

Supplement: s1 [file s1]
